# Supplementary material
Source: PubMed Central journal article supplement (PMC2765571)

**Supporting Information To Accompany:**

**A Simple Microscale Method For**

**Determining the Relative Stereochemistry of**

**Statine Units.**

*Alejandro Preciado, Philip G. Williams\**

Department of Chemistry, University of Hawaii at Manoa, Honolulu, Hawaii 96822

philipwi@hawaii.edu

## Table of Contents

|                                                                                                                |     |
|----------------------------------------------------------------------------------------------------------------|-----|
| <b>Figure S1.</b> $^1\text{H}$ NMR Spectrum of Compound <b>4a</b> at 300 MHz in $\text{CDCl}_3$                | S4  |
| <b>Figure S2.</b> $^1\text{H}$ NMR Spectrum of Compound <b>4b</b> at 300 MHz in $\text{CDCl}_3$                | S5  |
| <b>Figure S3.</b> $^1\text{H}$ NMR Spectrum of Compound <b>4c</b> at 300 MHz in $\text{CDCl}_3$                | S6  |
| <b>Figure S4.</b> $^1\text{H}$ NMR Spectrum of Compound <b>4d</b> at 300 MHz in $\text{CDCl}_3$                | S7  |
| <b>Figure S5.</b> $^1\text{H}$ NMR Spectrum of Compound <b>4e</b> at 300 MHz in $\text{CDCl}_3$                | S8  |
| <b>Figure S6.</b> $^1\text{H}$ NMR Spectrum of Compound <b>4f</b> at 300 MHz in $\text{CDCl}_3$                | S9  |
| <b>Figure S7.</b> $^1\text{H}$ NMR Spectrum of Compound <b>4g</b> at 300 MHz in $\text{CDCl}_3$                | S10 |
| <b>Figure S8.</b> $^1\text{H}$ NMR Spectrum of Compound <b>4h</b> at 300 MHz in $\text{CDCl}_3$                | S11 |
| <b>Figure S9.</b> $^1\text{H}$ NMR Spectrum of Compound <b>4i</b> at 300 MHz in $\text{CDCl}_3$                | S12 |
| <b>Figure S10.</b> $^1\text{H}$ NMR Spectrum of Compound <b>4j</b> at 300 MHz in $\text{CDCl}_3$               | S13 |
| <b>Figure S11.</b> $^1\text{H}$ NMR Spectrum of Compound <b>4k</b> at 300 MHz in $\text{CDCl}_3$               | S14 |
| <b>Figure S12.</b> $^1\text{H}$ NMR Spectrum of Compound <b>4l</b> at 300 MHz in $\text{CDCl}_3$               | S15 |
| <b>Figure S13.</b> $^1\text{H}$ NMR Spectrum of Compound <b>4m</b> at 300 MHz in $\text{CDCl}_3$               | S16 |
| <b>Figure S14.</b> $^1\text{H}$ NMR Spectrum of Compound <b>4n</b> at 300 MHz in $\text{CDCl}_3$               | S17 |
| <b>Figure S15.</b> $^1\text{H}$ NMR Spectrum of Compound <b>4o</b> at 300 MHz in $\text{CDCl}_3$               | S18 |
| <b>Figure S16.</b> $^1\text{H}$ NMR Spectrum of Compound <b>4p</b> at 300 MHz in $\text{CDCl}_3$               | S19 |
| <b>Figure S17.</b> $^1\text{H}$ NMR Spectrum of Compound <b>4q</b> at 300 MHz in $\text{CDCl}_3$               | S20 |
| <b>Figure S18.</b> $^1\text{H}$ NMR Spectrum of Compound <b>4r</b> at 300 MHz in $\text{CDCl}_3$               | S21 |
| <b>Figure S19.</b> $^1\text{H}$ NMR Spectrum of Compound <b>6a</b> at 300 MHz in $\text{CDCl}_3$               | S22 |
| <b>Figure S20.</b> $^1\text{H}$ NMR Spectrum of Compound <b>6b</b> at 300 MHz in $\text{CDCl}_3$               | S23 |
| <b>Figure S21.</b> $^1\text{H}$ NMR Spectrum of Compound <b>7a</b> at 300 MHz in $\text{CDCl}_3$               | S24 |
| <b>Figure S22.</b> $^1\text{H}$ NMR Spectrum of Compound <b>7b</b> at 300 MHz in $\text{CDCl}_3$               | S25 |
| <b>Figure S23.</b> $^1\text{H}$ NMR Spectrum of Compound <b>8a</b> at 300 MHz in $\text{CDCl}_3$               | S26 |
| <b>Figure S24.</b> $^1\text{H}$ NMR Spectrum of Compound <b>8b</b> at 300 MHz in $\text{CDCl}_3$               | S27 |
| <b>Figure S25.</b> $^1\text{H}$ NMR Spectrum of Compound <b>10a</b> at 300 MHz in $\text{CDCl}_3$              | S28 |
| <b>Figure S26.</b> $^1\text{H}$ NMR Spectrum of Compound <b>10a</b> at 300 MHz in $\text{DMSO-}d_6$            | S29 |
| <b>Figure S27.</b> $^1\text{H}$ NMR Spectrum of Compound <b>10b</b> at 300 MHz in $\text{CDCl}_3$              | S30 |
| <b>Figure S28.</b> $^1\text{H}$ NMR Spectrum of Compound <b>10b</b> at 300 MHz in $\text{DMSO-}d_6$            | S31 |
| <b>Figure S29.</b> $^1\text{H}$ NMR Spectrum of Compound <b>11a</b> at 300 MHz in $\text{CDCl}_3$              | S32 |
| <b>Figure S30.</b> $^1\text{H}$ NMR Spectrum of Compound <b>11a</b> at 300 MHz in $\text{DMSO-}d_6$            | S33 |
| <b>Figure S31.</b> $^1\text{H}$ NMR Spectrum of Compound <b>11b</b> at 300 MHz in $\text{CDCl}_3$              | S34 |
| <b>Figure S32.</b> $^1\text{H}$ NMR Spectrum of Compound <b>11b</b> at 300 MHz in $\text{DMSO-}d_6$            | S35 |
| <b>Figure S33.</b> $^1\text{H}$ NMR Spectrum of Compound <b>11c</b> at 300 MHz in $\text{CDCl}_3$              | S36 |
| <b>Figure S34.</b> $^1\text{H}$ NMR Spectrum of Compound <b>12a</b> at 300 MHz in $\text{CDCl}_3$              | S37 |
| <b>Figure S35.</b> $^1\text{H}$ NMR Spectrum of Compound <b>12b</b> at 300 MHz in $\text{CDCl}_3$              | S38 |
| <b>Figure S36.</b> $^1\text{H}$ NMR Spectrum of Compound <b>12c</b> at 500 MHz in $\text{CDCl}_3$              | S39 |
| <b>Figure S37.</b> $^1\text{H}$ NMR Spectrum of Compound <b>12d</b> at 500 MHz in $\text{CDCl}_3$ at $0^\circ$ | S40 |
| <b>Figure S38.</b> $^1\text{H}$ NMR Spectrum of Compound <b>13a</b> at 300 MHz in $\text{CDCl}_3$              | S41 |
| <b>Figure S39.</b> $^1\text{H}$ NMR Spectrum of Compound <b>13b</b> at 300 MHz in $\text{CDCl}_3$              | S42 |
| <b>Figure S40.</b> $^1\text{H}$ NMR Spectrum of Compound <b>14a</b> at 300 MHz in $\text{CDCl}_3$              | S43 |
| <b>Figure S41.</b> $^1\text{H}$ NMR Spectrum of Compound <b>14b</b> at 300 MHz in $\text{CDCl}_3$              | S44 |
| <b>Figure S42.</b> $^1\text{H}$ NMR Spectrum of Compound <b>15a</b> at 300 MHz in $\text{CDCl}_3$              | S45 |
| <b>Figure S43.</b> $^1\text{H}$ NMR Spectrum of Compound <b>15b</b> at 300 MHz in $\text{CDCl}_3$              | S46 |

|                                                                                                      |     |
|------------------------------------------------------------------------------------------------------|-----|
| <b>Figure S44.</b> <sup>1</sup> HNMR Spectrum of Compound <b>16a</b> at 300 MHz in CDCl <sub>3</sub> | S47 |
| <b>Figure S45.</b> <sup>1</sup> HNMR Spectrum of Compound <b>16b</b> at 300 MHz in CDCl <sub>3</sub> | S48 |
| <b>Figure S46.</b> <sup>1</sup> HNMR Spectrum of Compound <b>17a</b> at 300 MHz in CDCl <sub>3</sub> | S49 |
| <b>Figure S47.</b> <sup>1</sup> HNMR Spectrum of Compound <b>17b</b> at 300 MHz in CDCl <sub>3</sub> | S50 |
| <b>Figure S48.</b> <sup>1</sup> HNMR Spectrum of Compound <b>19a</b> at 300 MHz in CDCl <sub>3</sub> | S51 |
| <b>Figure S49.</b> <sup>1</sup> HNMR Spectrum of Compound <b>19b</b> at 300 MHz in CDCl <sub>3</sub> | S52 |
| <b>Figure S50.</b> <sup>1</sup> HNMR Spectrum of Compound <b>20a</b> at 300 MHz in CDCl <sub>3</sub> | S53 |
| <b>Figure S51.</b> <sup>1</sup> HNMR Spectrum of Compound <b>20b</b> at 300 MHz in CDCl <sub>3</sub> | S54 |
| <b>Figure S52.</b> <sup>1</sup> HNMR Spectrum of Compound <b>21a</b> at 300 MHz in CDCl <sub>3</sub> | S55 |
| <b>Figure S53.</b> <sup>1</sup> HNMR Spectrum of Compound <b>21b</b> at 300 MHz in CDCl <sub>3</sub> | S56 |
| <b>Figure S54.</b> <sup>1</sup> HNMR Spectrum of Compound <b>21c</b> at 300 MHz in CDCl <sub>3</sub> | S57 |
| <b>Figure S55.</b> <sup>1</sup> HNMR Spectrum of Compound <b>21d</b> at 300 MHz in CDCl <sub>3</sub> | S58 |
| <b>Figure S56.</b> <sup>1</sup> HNMR Spectrum of Compound <b>22a</b> at 300 MHz in CDCl <sub>3</sub> | S59 |
| <b>Figure S57.</b> <sup>1</sup> HNMR Spectrum of Compound <b>22b</b> at 300 MHz in CDCl <sub>3</sub> | S60 |
| <b>Figure S58.</b> <sup>1</sup> HNMR Spectrum of Compound <b>22c</b> at 300 MHz in CDCl <sub>3</sub> | S61 |
| <b>Figure S59.</b> <sup>1</sup> HNMR Spectrum of Compound <b>23a</b> at 300 MHz in CDCl <sub>3</sub> | S62 |
| <b>Figure S60.</b> <sup>1</sup> HNMR Spectrum of Compound <b>23b</b> at 300 MHz in CDCl <sub>3</sub> | S63 |
| <b>Figure S61.</b> <sup>1</sup> HNMR Spectrum of Compound <b>24a</b> at 300 MHz in CDCl <sub>3</sub> | S64 |
| <b>Figure S62.</b> <sup>1</sup> HNMR Spectrum of Compound <b>24b</b> at 300 MHz in CDCl <sub>3</sub> | S65 |
| <b>Figure S63.</b> <sup>1</sup> HNMR Spectrum of Compound <b>18a</b> at 300 MHz in CDCl <sub>3</sub> | S66 |
| <b>Figure S64.</b> <sup>1</sup> HNMR Spectrum of Compound <b>18b</b> at 300 MHz in CDCl <sub>3</sub> | S67 |
| <b>Figure S65.</b> <sup>1</sup> HNMR Spectrum of Compound <b>16c</b> at 300 MHz in CDCl <sub>3</sub> | S68 |
| <b>Figure S66.</b> <sup>1</sup> HNMR Spectrum of Compound <b>24c</b> at 300 MHz in CDCl <sub>3</sub> | S69 |
| <b>Figure S67.</b> LC Chromatogram of <b>24c</b> with ELSD detection                                 | S70 |
| <b>Figure S68.</b> <sup>1</sup> HNMR Spectrum of Compound <b>9a</b> at 300 MHz in CDCl <sub>3</sub>  | S71 |
| <b>Figure S69.</b> <sup>1</sup> HNMR Spectrum of Compound <b>9b</b> at 300 MHz in CDCl <sub>3</sub>  | S72 |
| <b>Figure S70.</b> LC Chromatogram of <b>12c</b> with ELSD detection                                 | S73 |

Figure S1. <sup>1</sup>H NMR Spectrum of Compound **4a** at 300 MHz in CDCl<sub>3</sub>

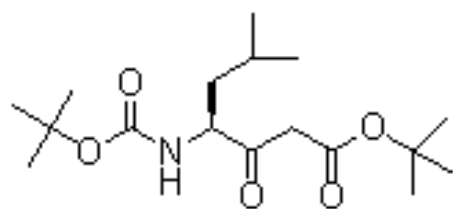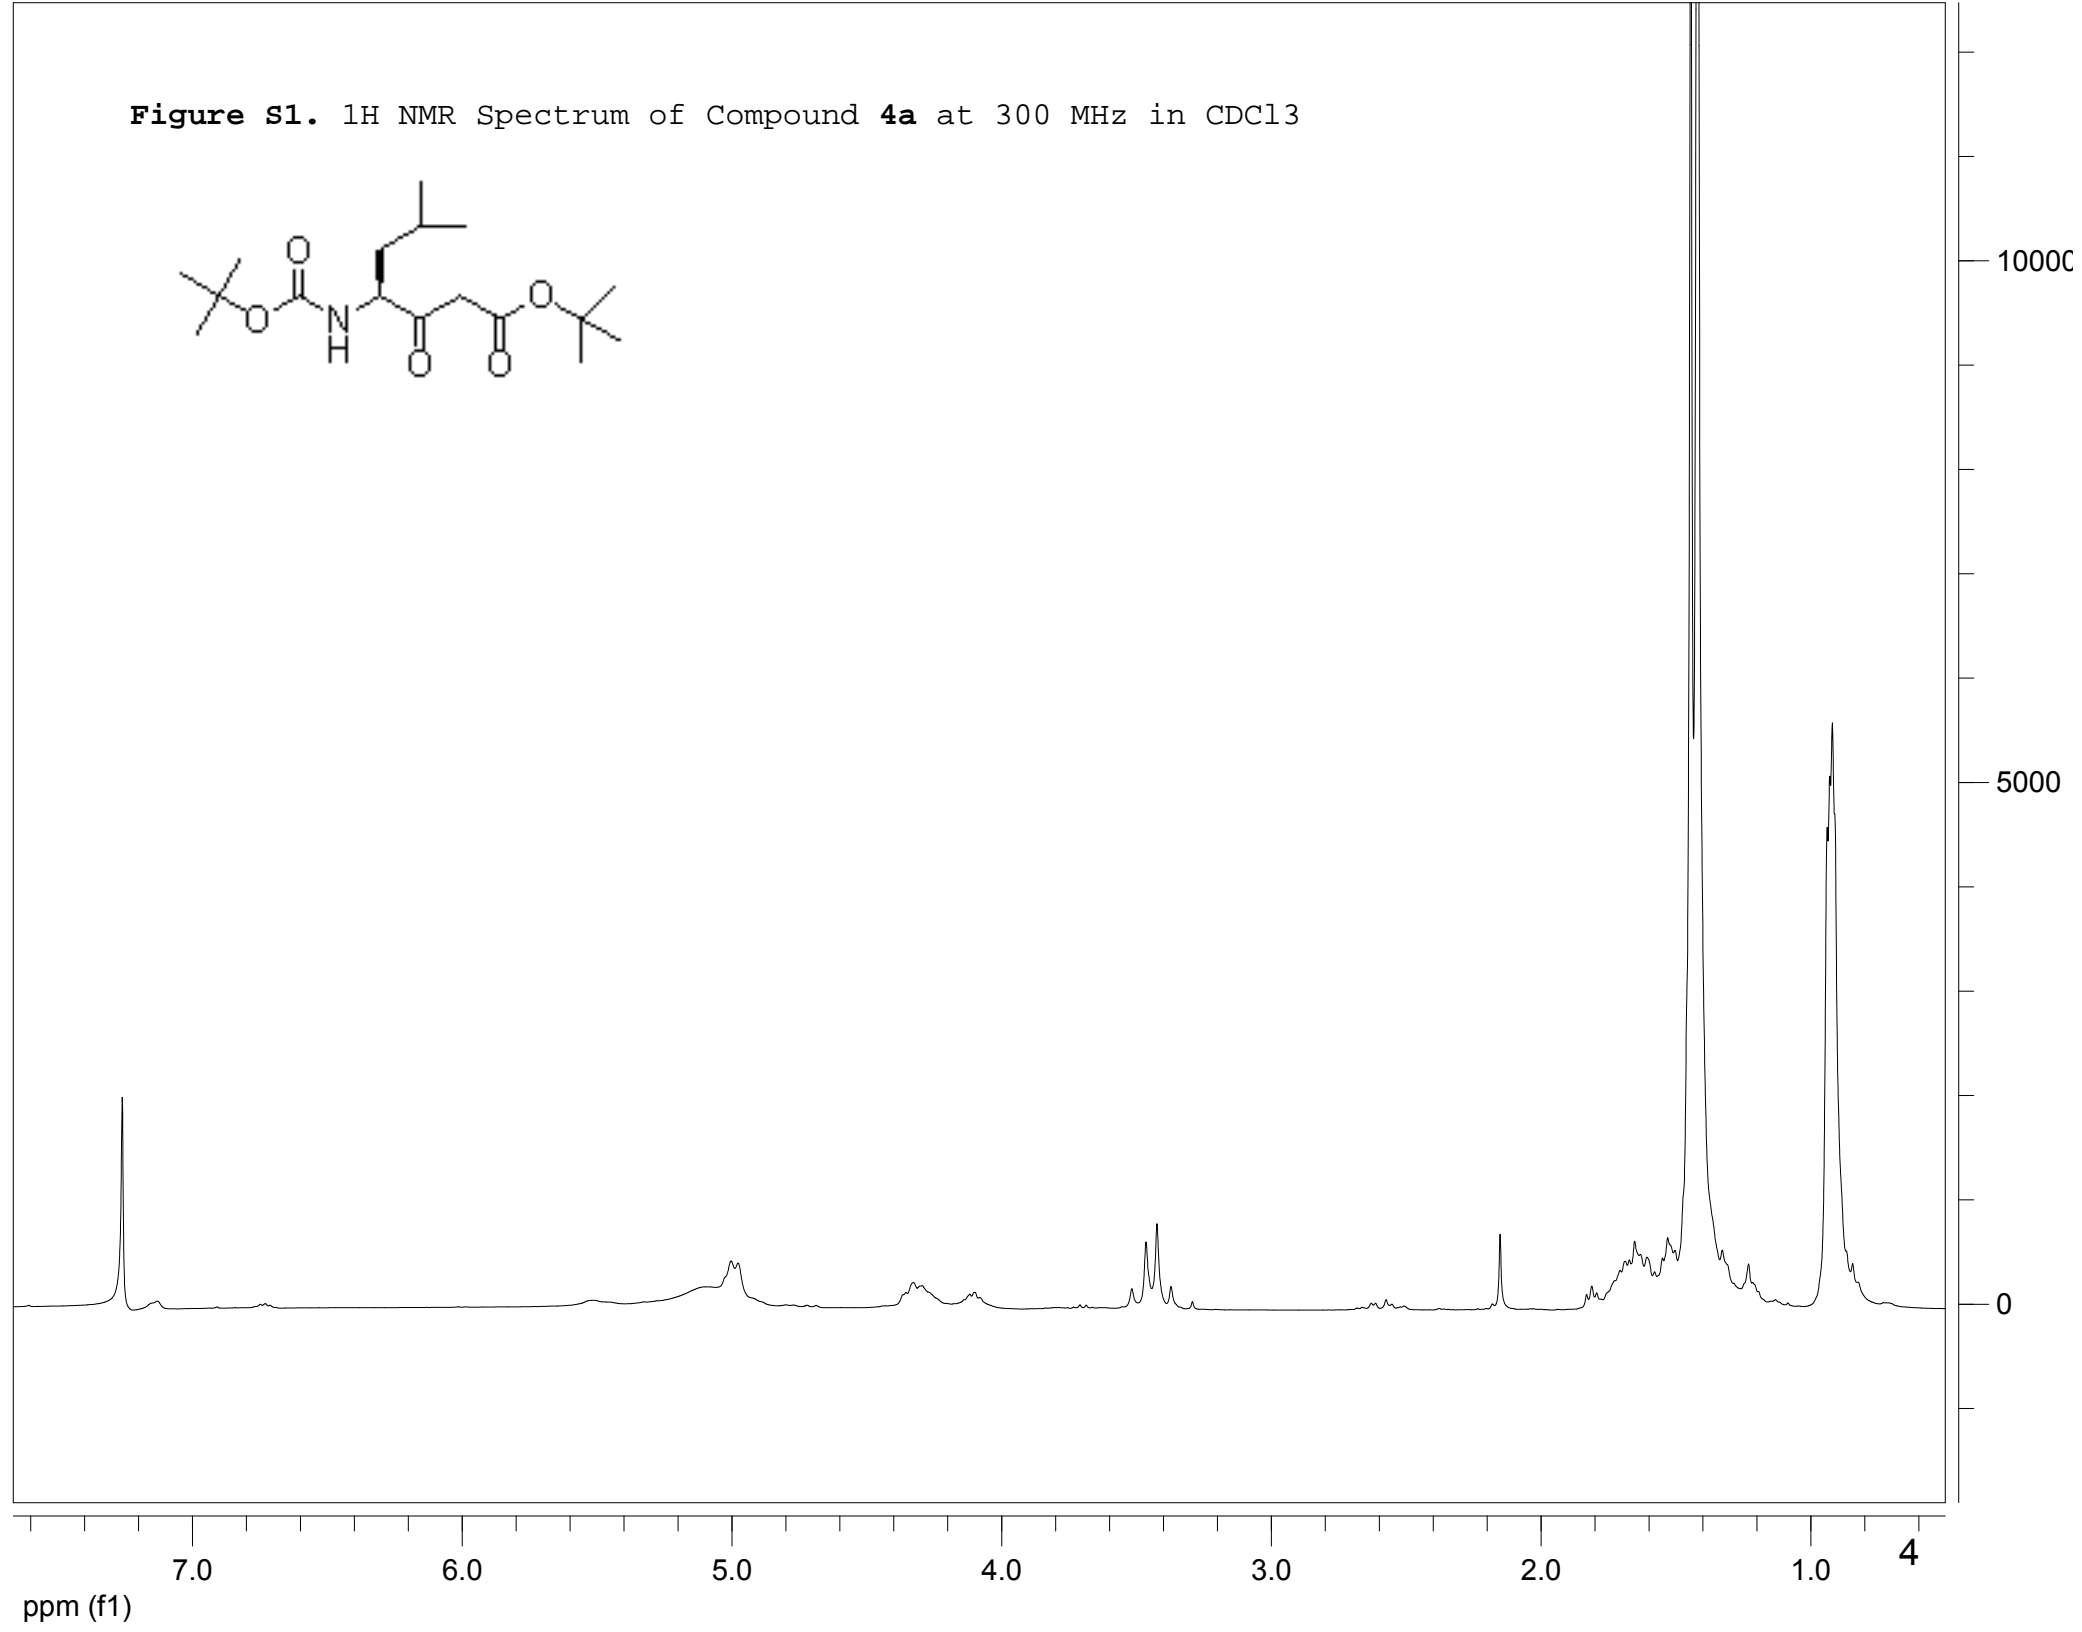

Figure S2. <sup>1</sup>H NMR Spectrum of Compound **4b** at 300 MHz in CDCl<sub>3</sub>

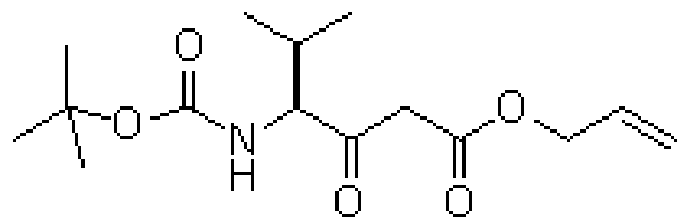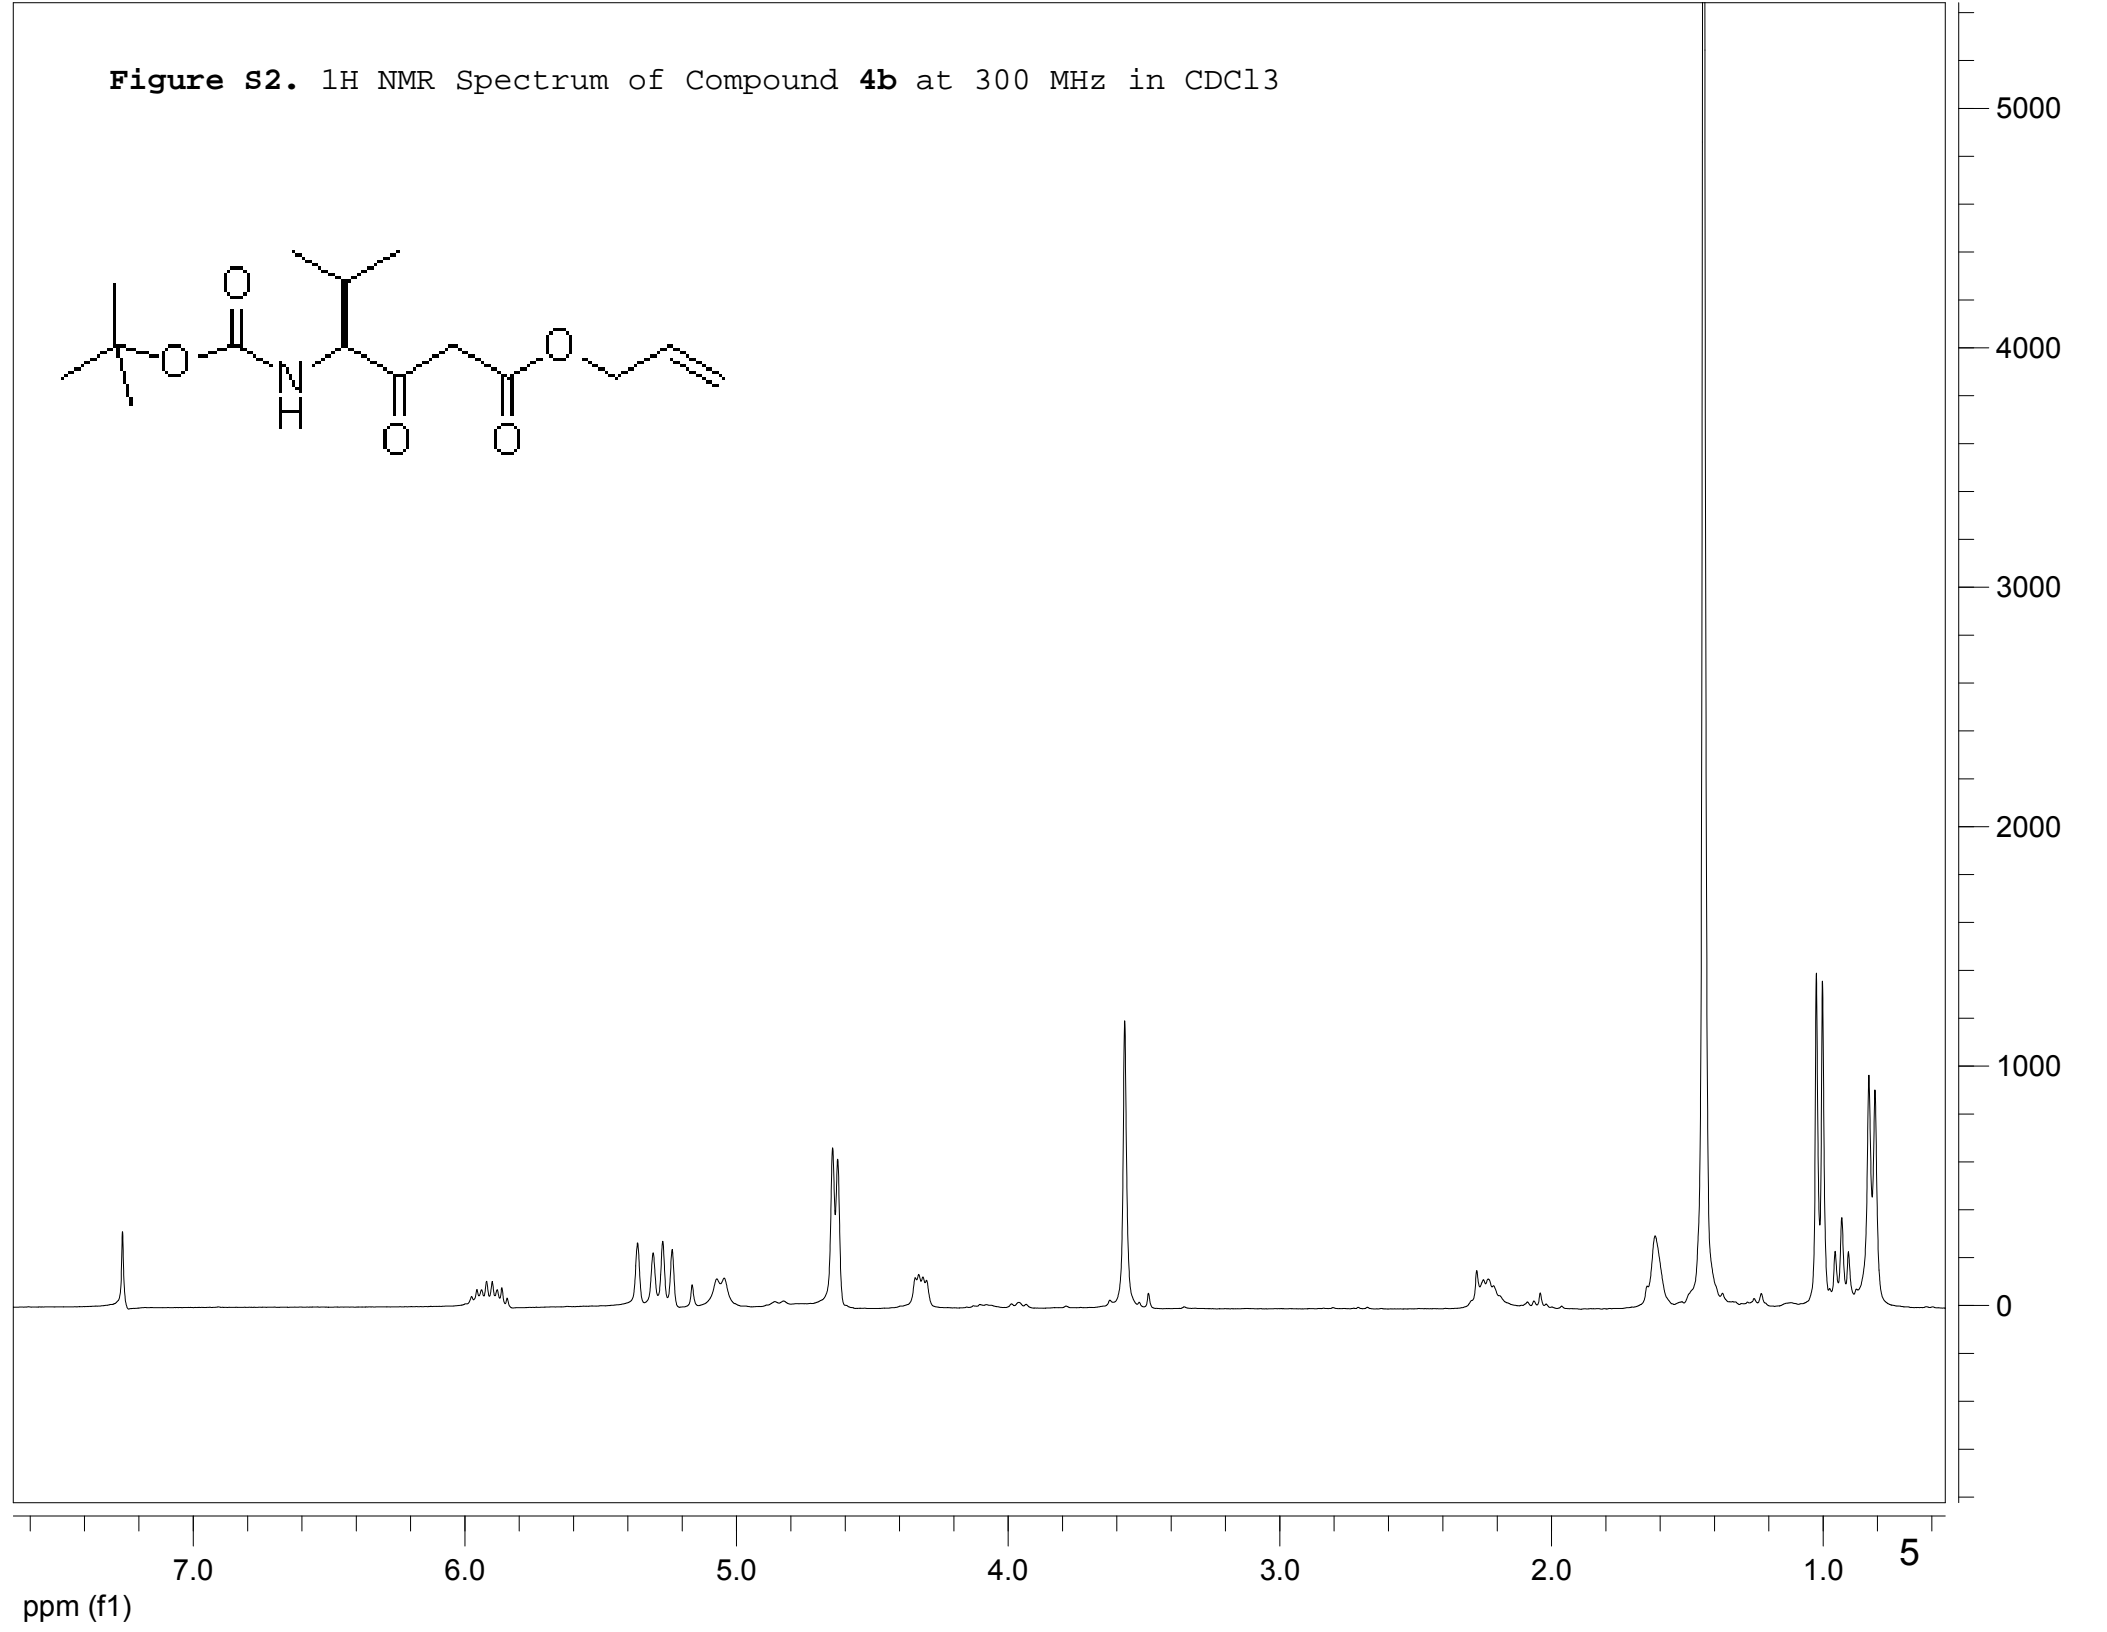

Figure S3. <sup>1</sup>H NMR Spectrum of Compound **4c** at 300 MHz in CDCl<sub>3</sub>

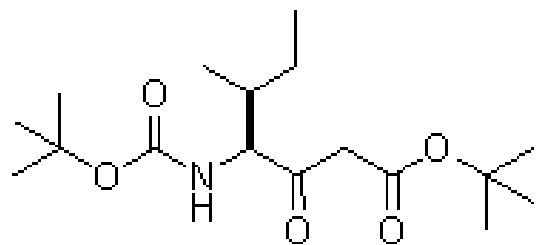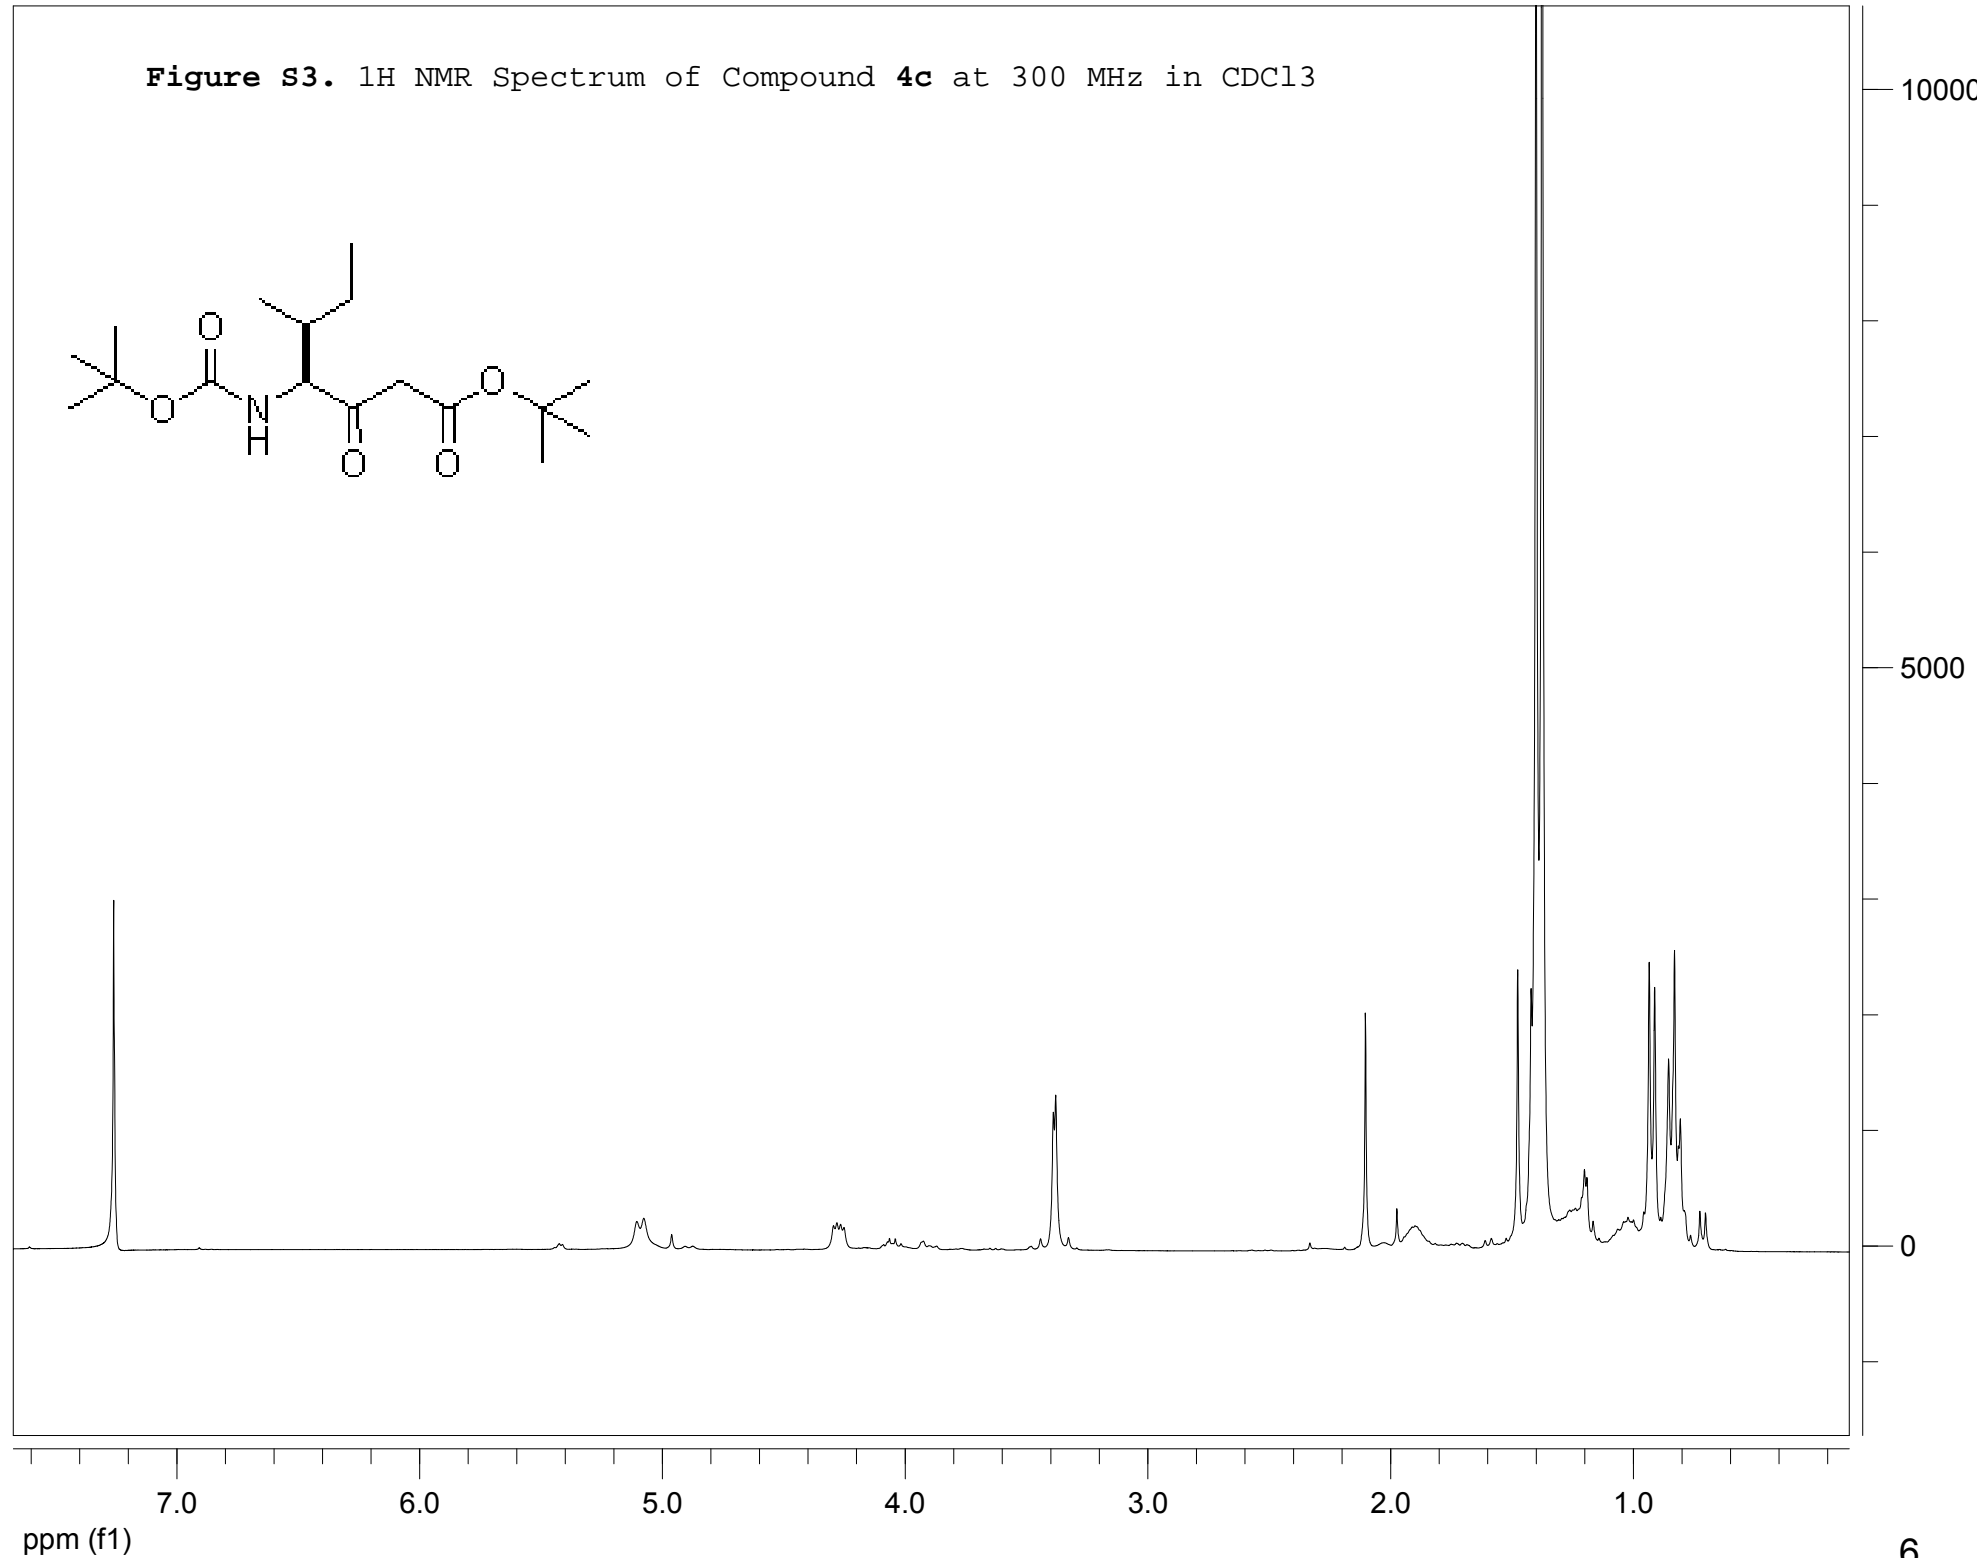

Figure S4. <sup>1</sup>H NMR Spectrum of Compound 4d at 300 MHz in CDCl<sub>3</sub>

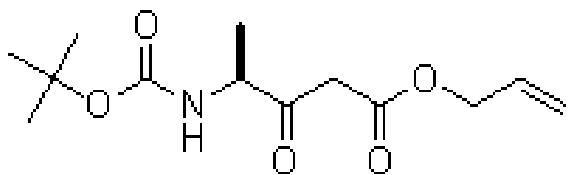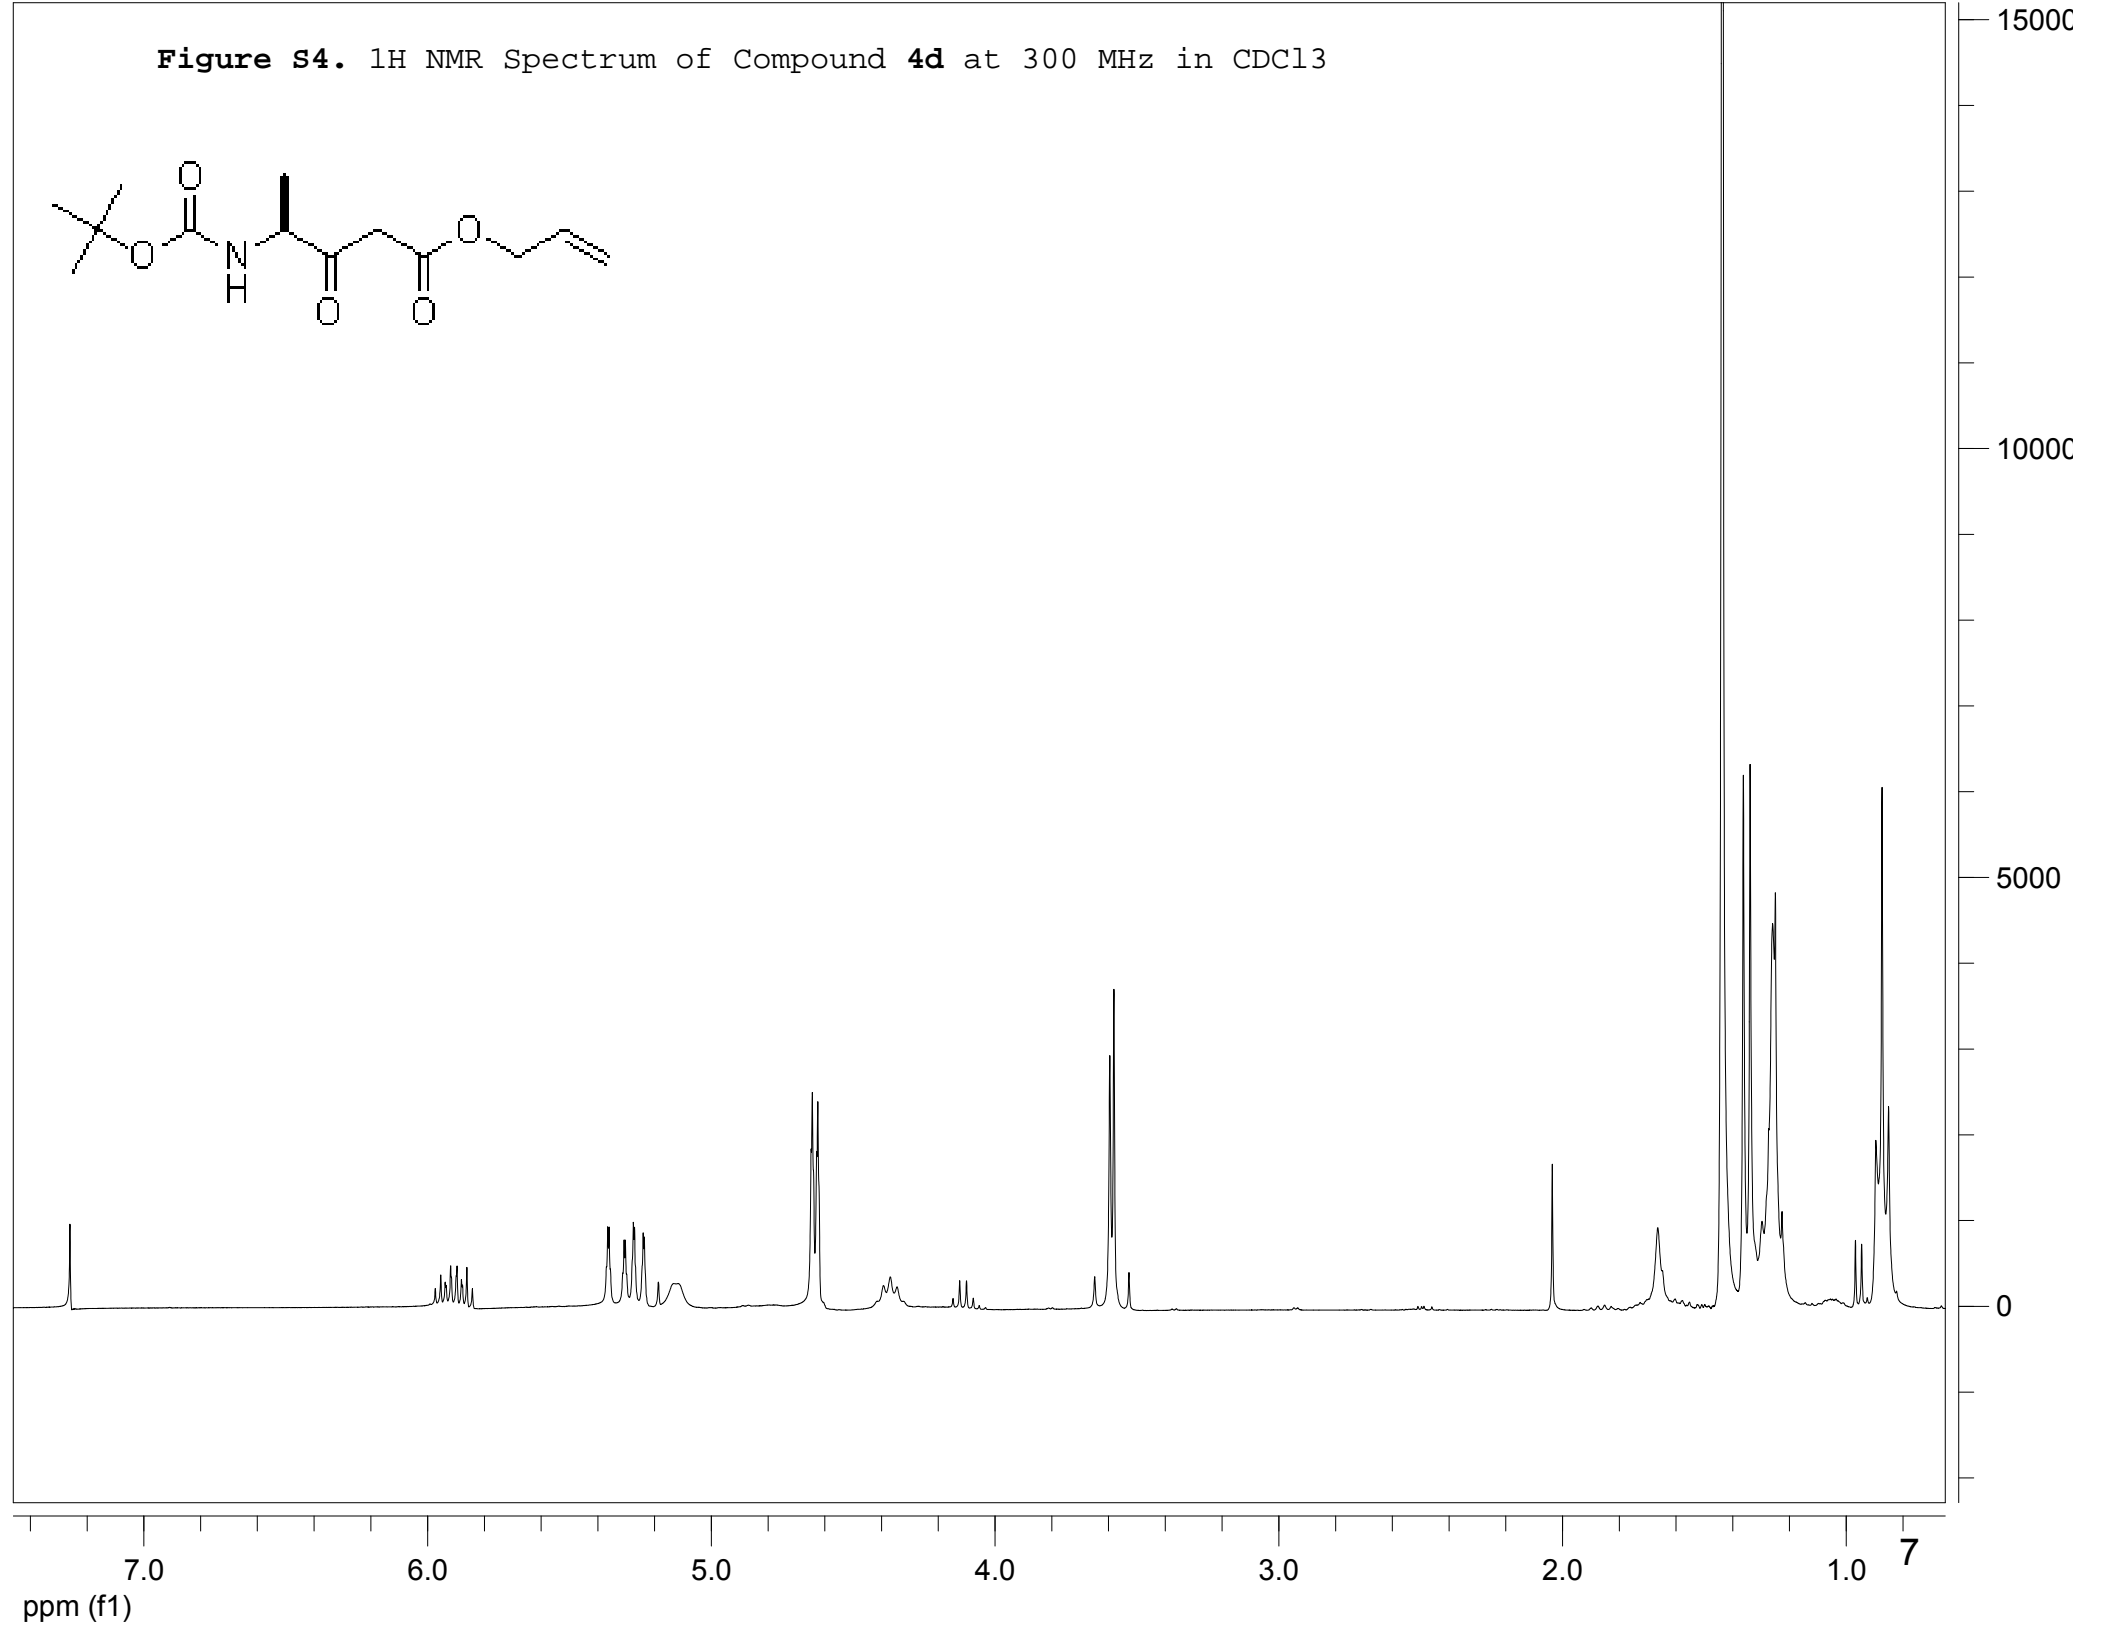

Figure S5. <sup>1</sup>H NMR Spectrum of Compound **4e** at 300 MHz in CDCl<sub>3</sub>

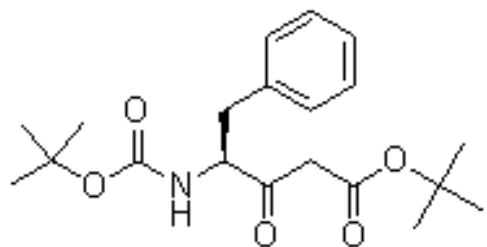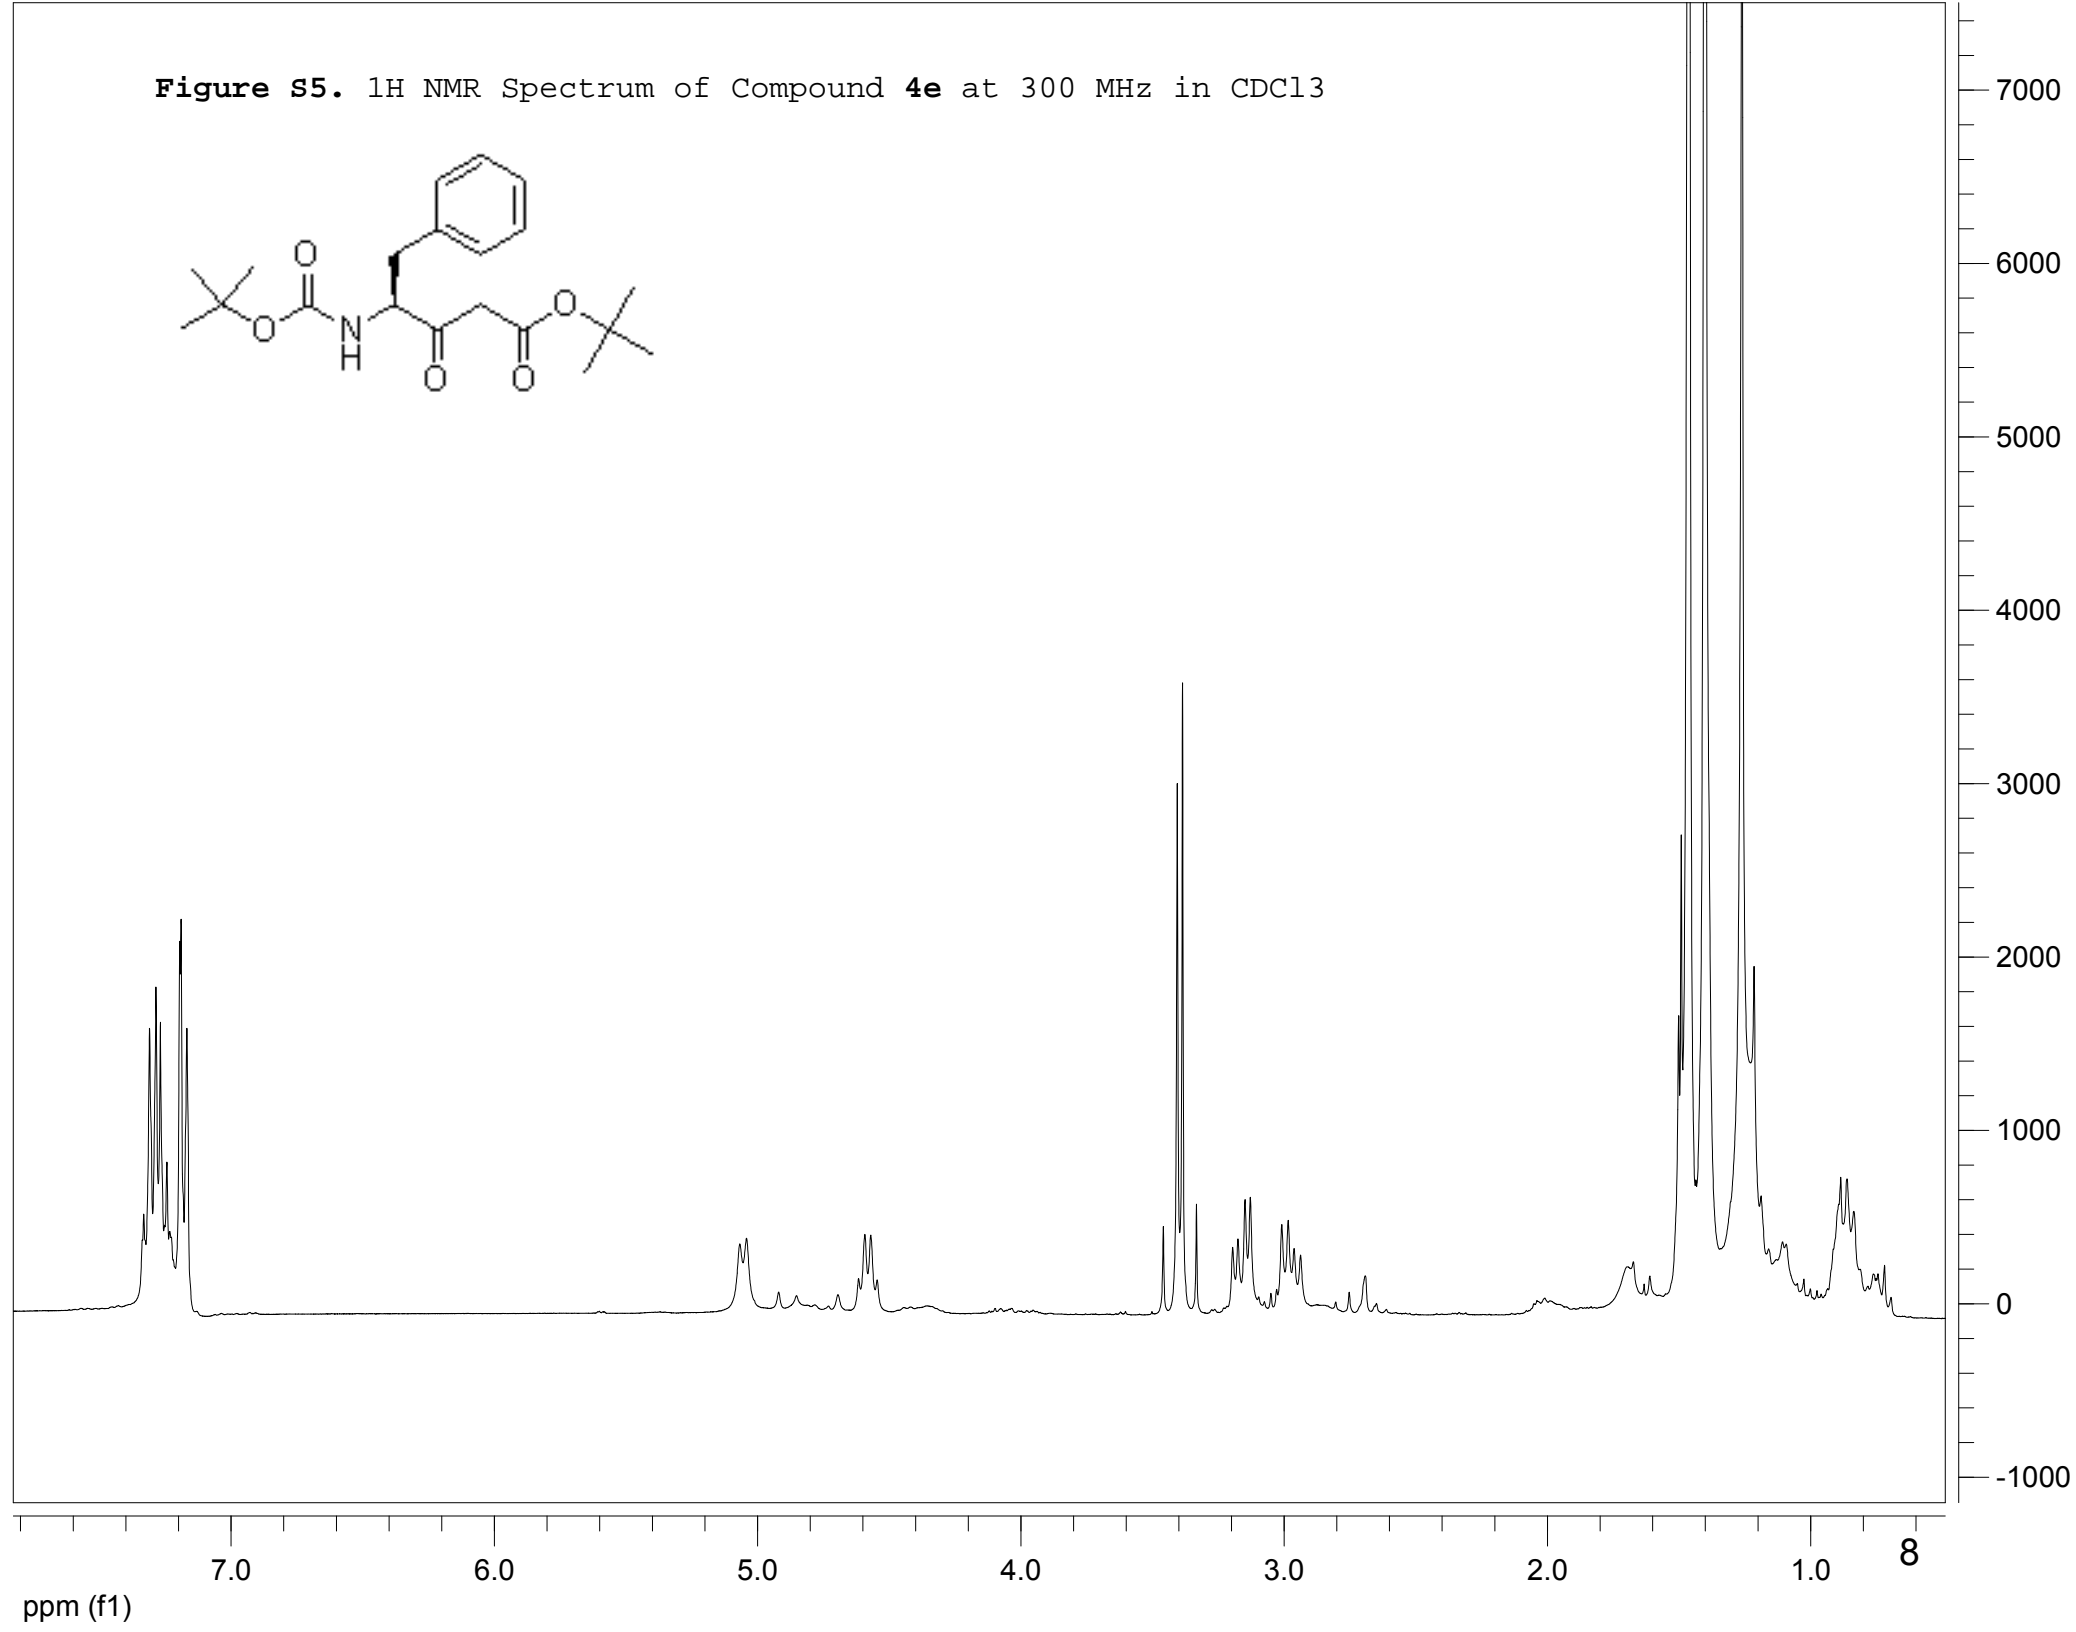



Figure S6. <sup>1</sup>H NMR Spectrum of Compound 4f at 300 MHz in CDCl<sub>3</sub>

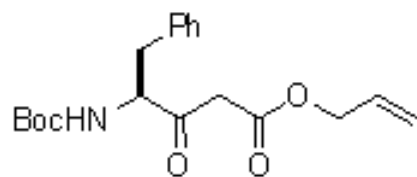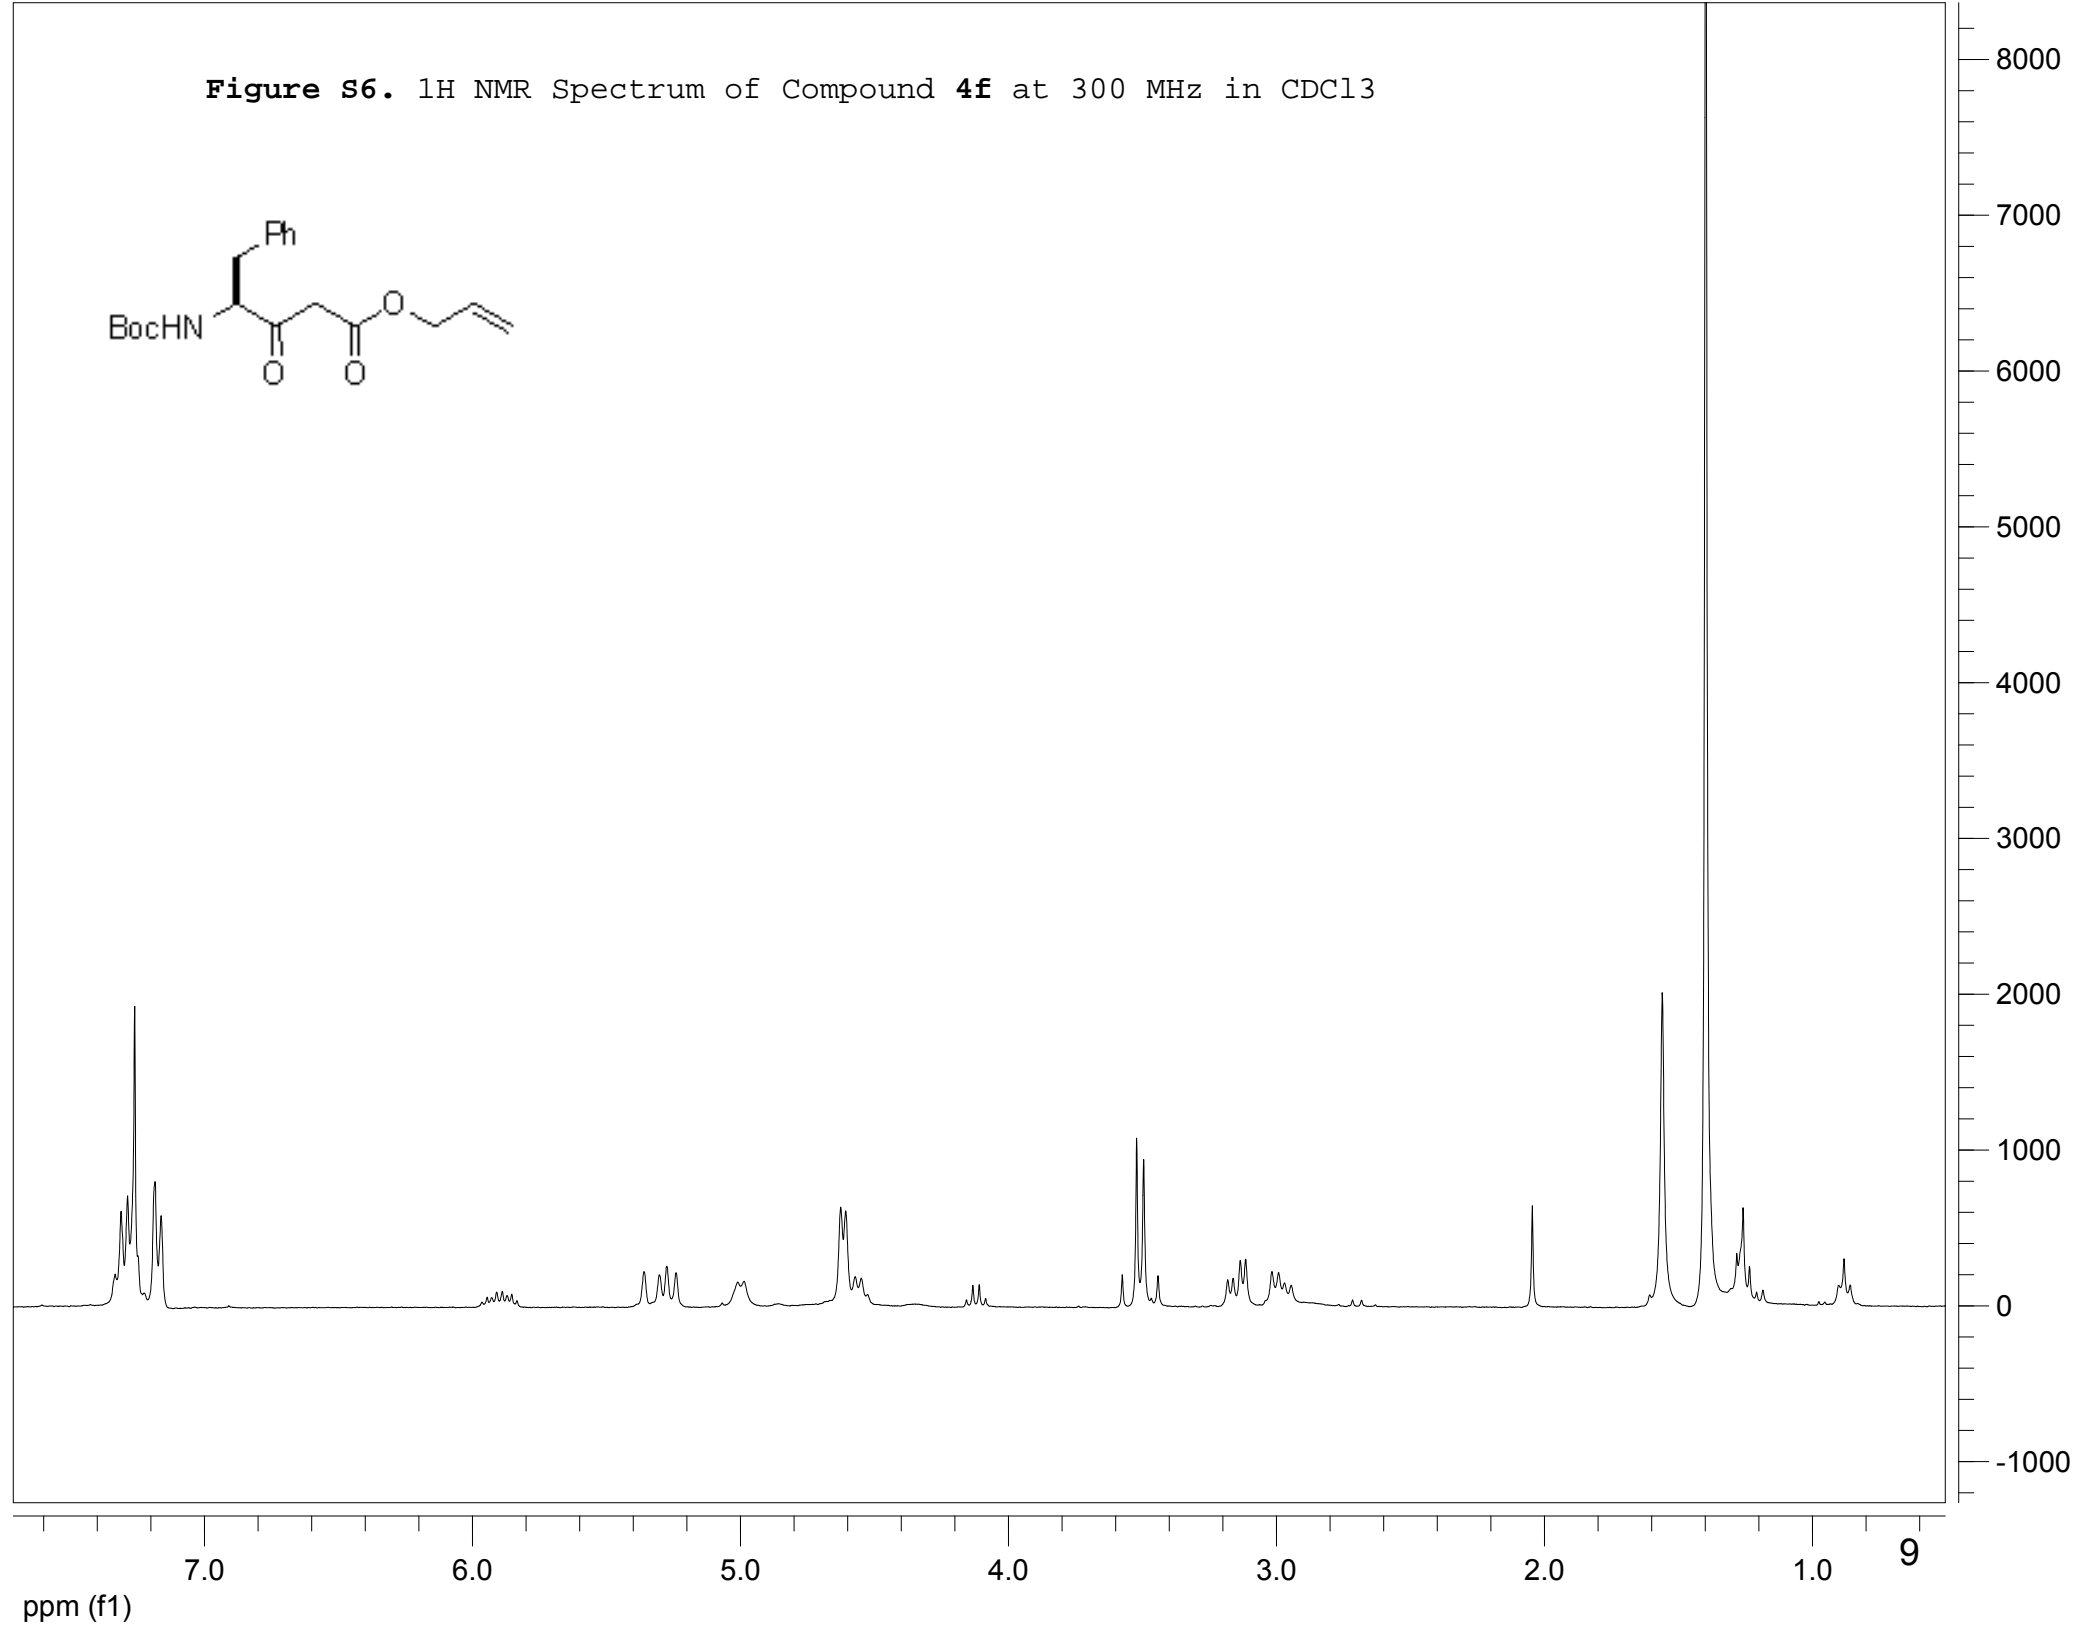

Figure S7. <sup>1</sup>H NMR Spectrum of Compound 4g at 300 MHz in CDCl<sub>3</sub>

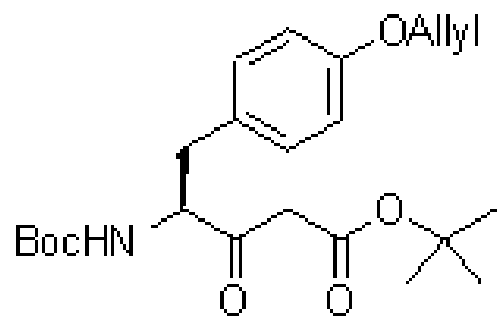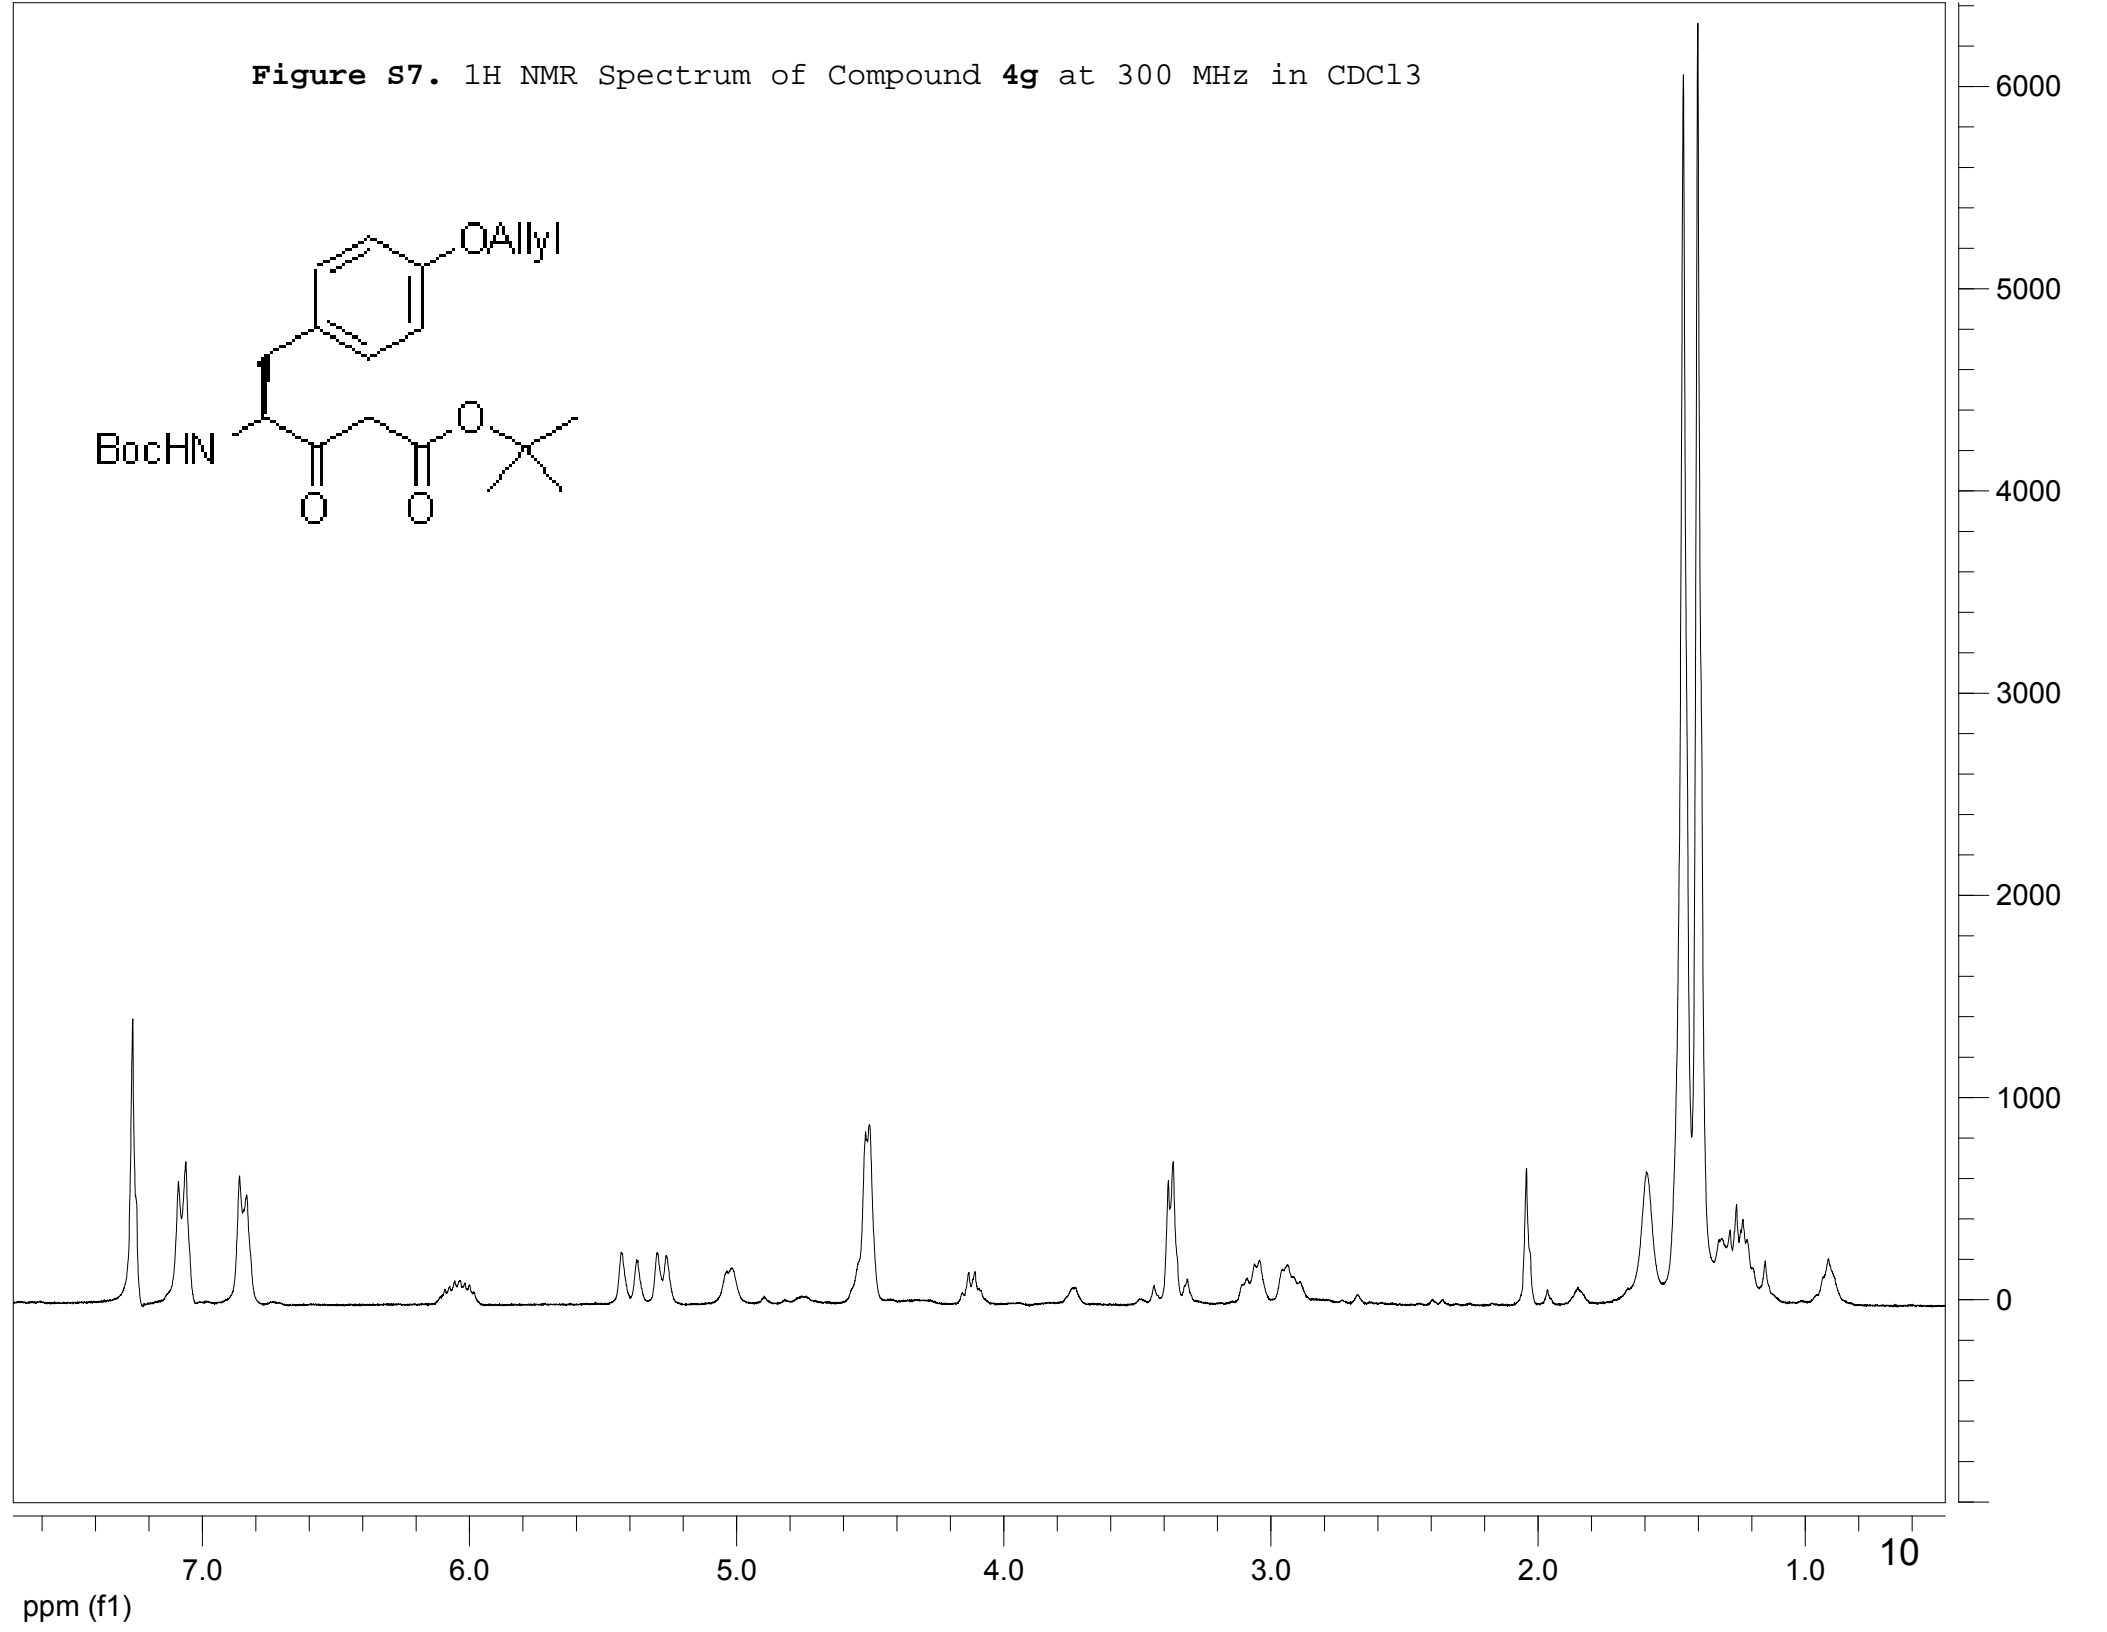

Figure S8. <sup>1</sup>H NMR Spectrum of Compound **4h** at 300 MHz in CDCl<sub>3</sub>

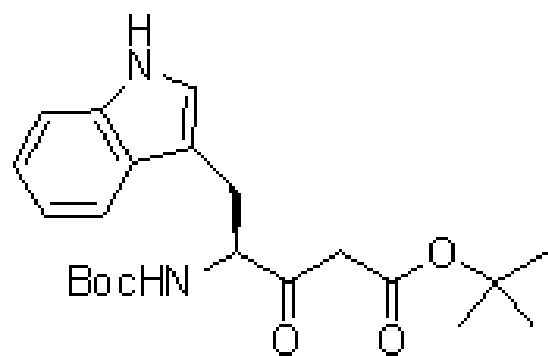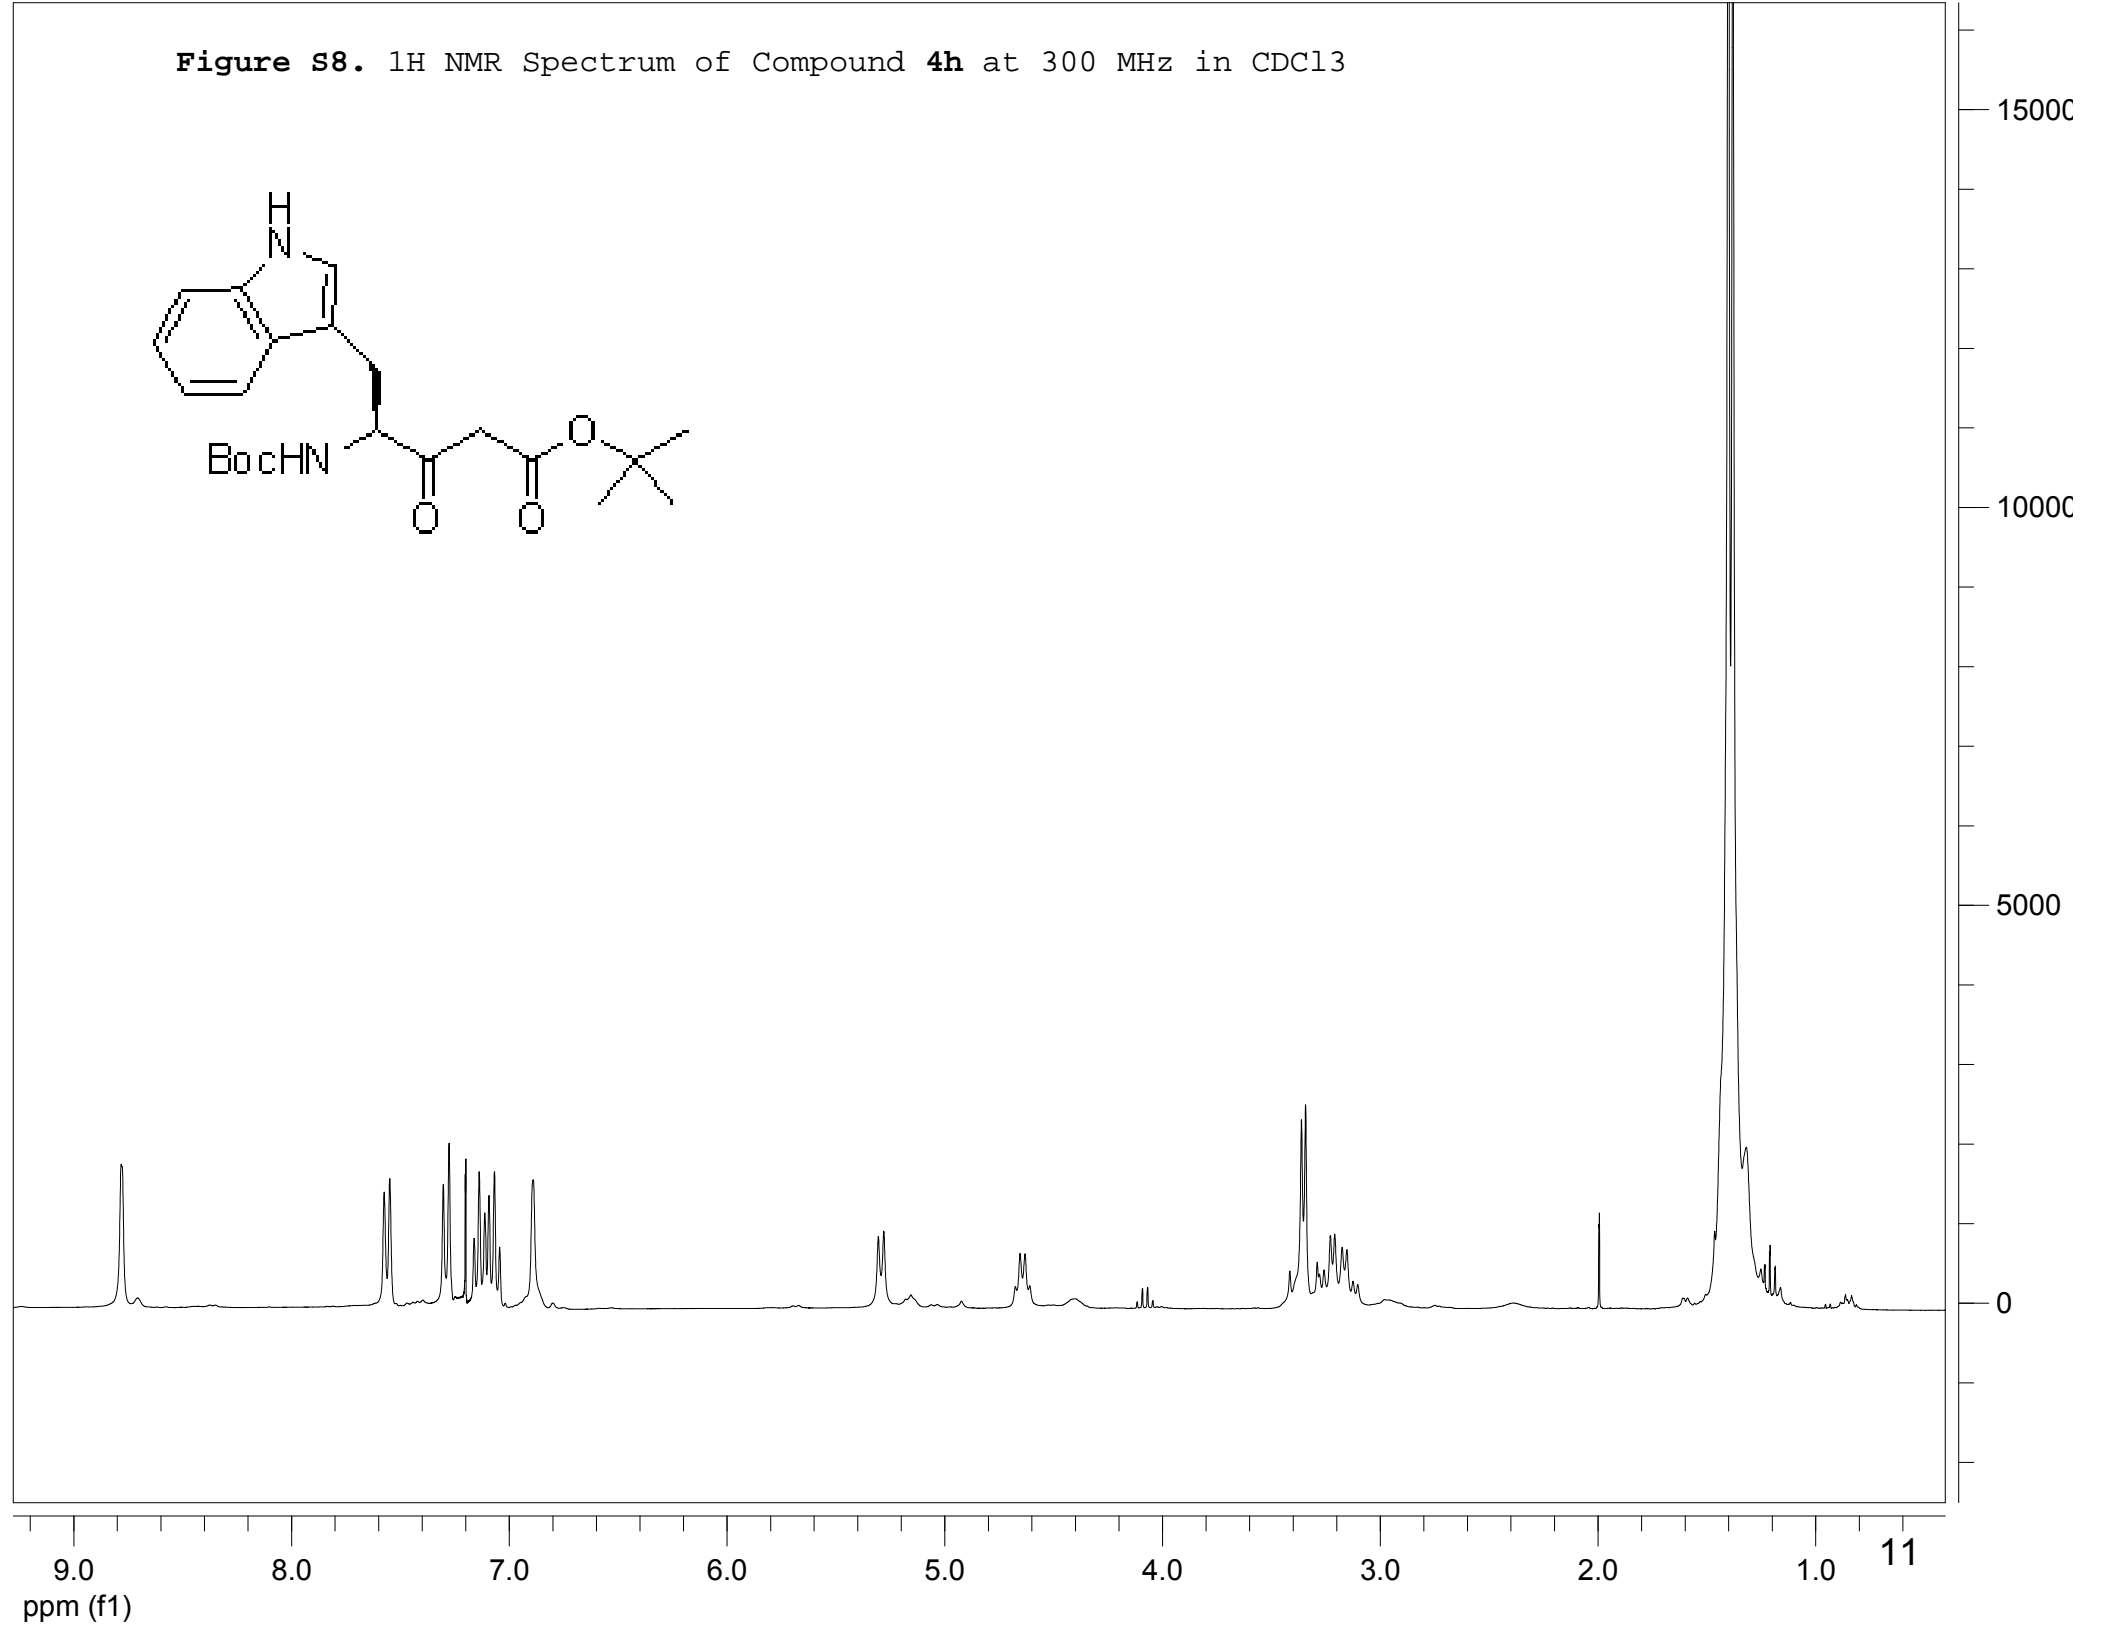

Figure S9. <sup>1</sup>H NMR Spectrum of Compound **4i** at 300 MHz in CDCl<sub>3</sub>

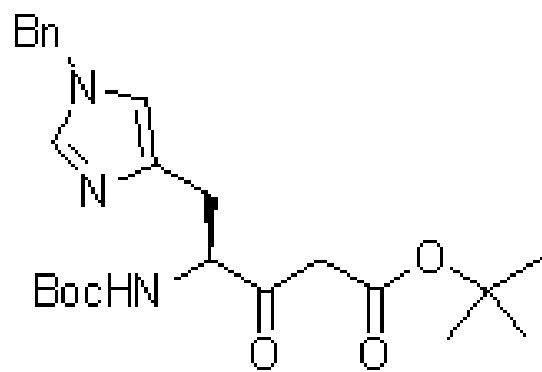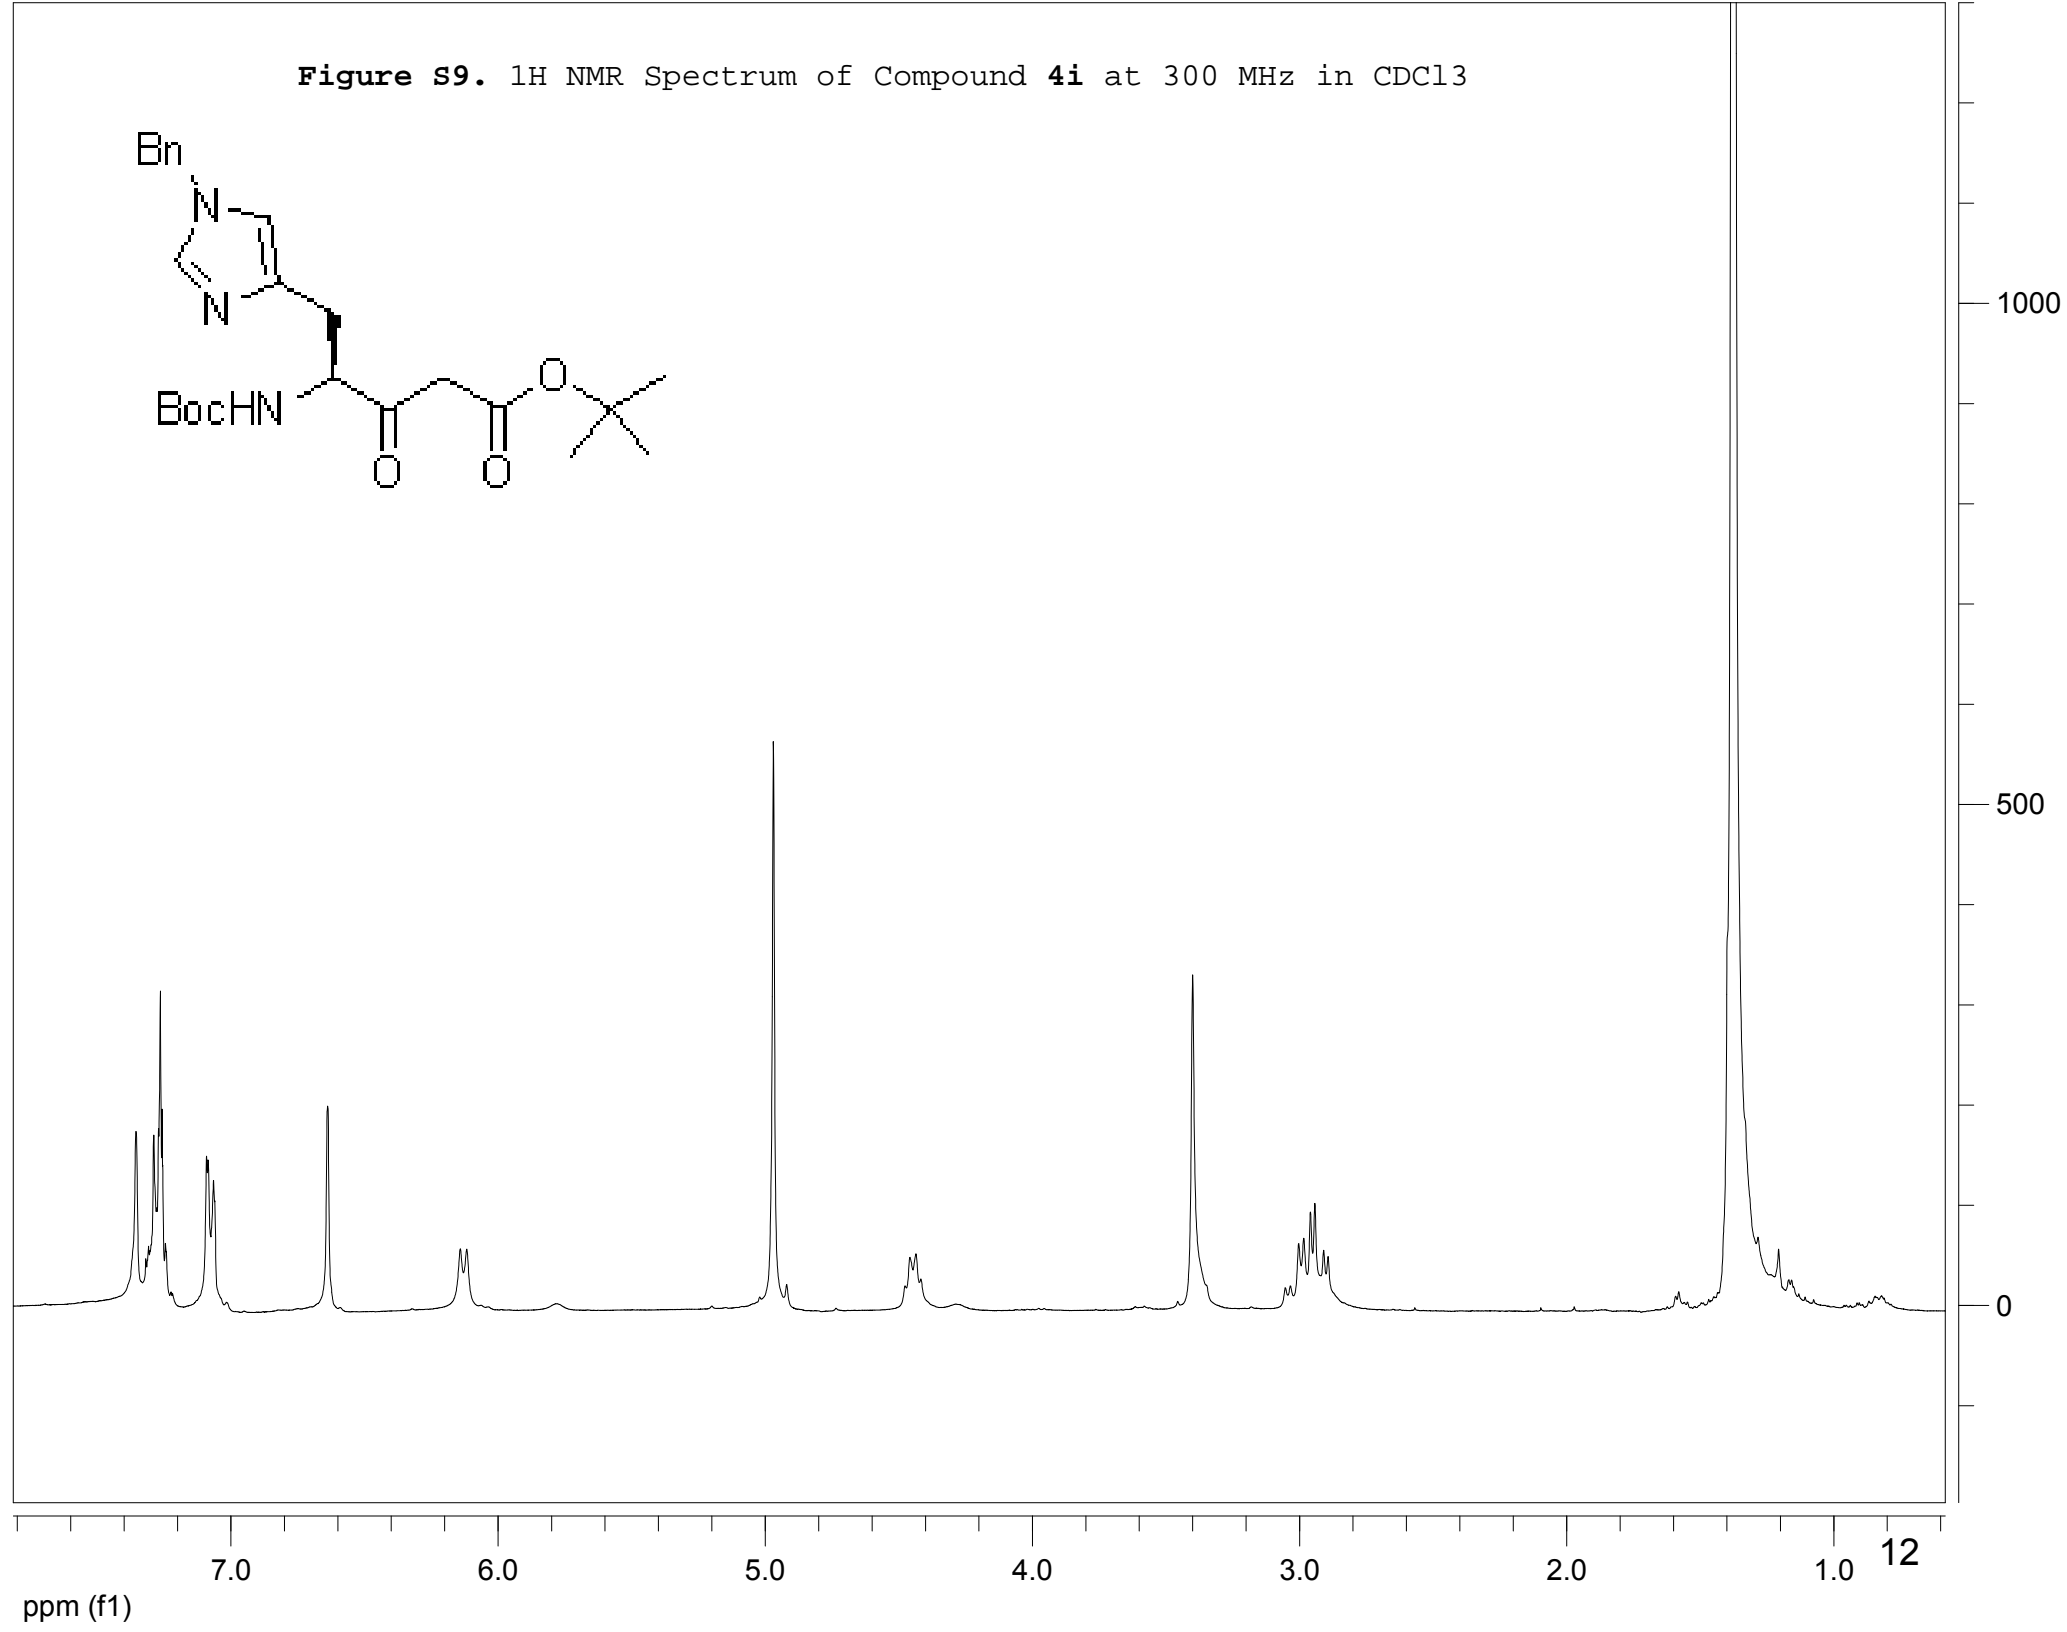

Figure S10. <sup>1</sup>H NMR Spectrum of Compound 4j at 300 MHz in CDCl<sub>3</sub>

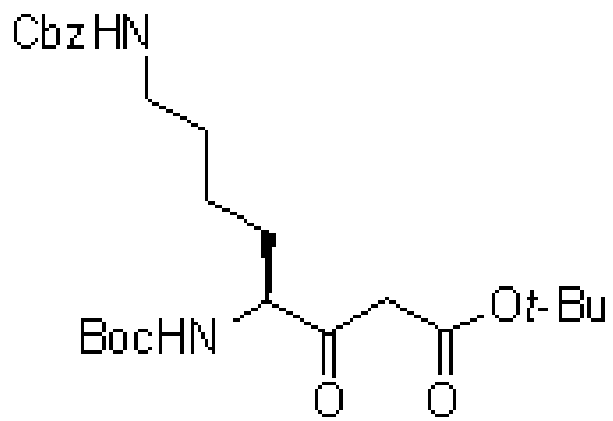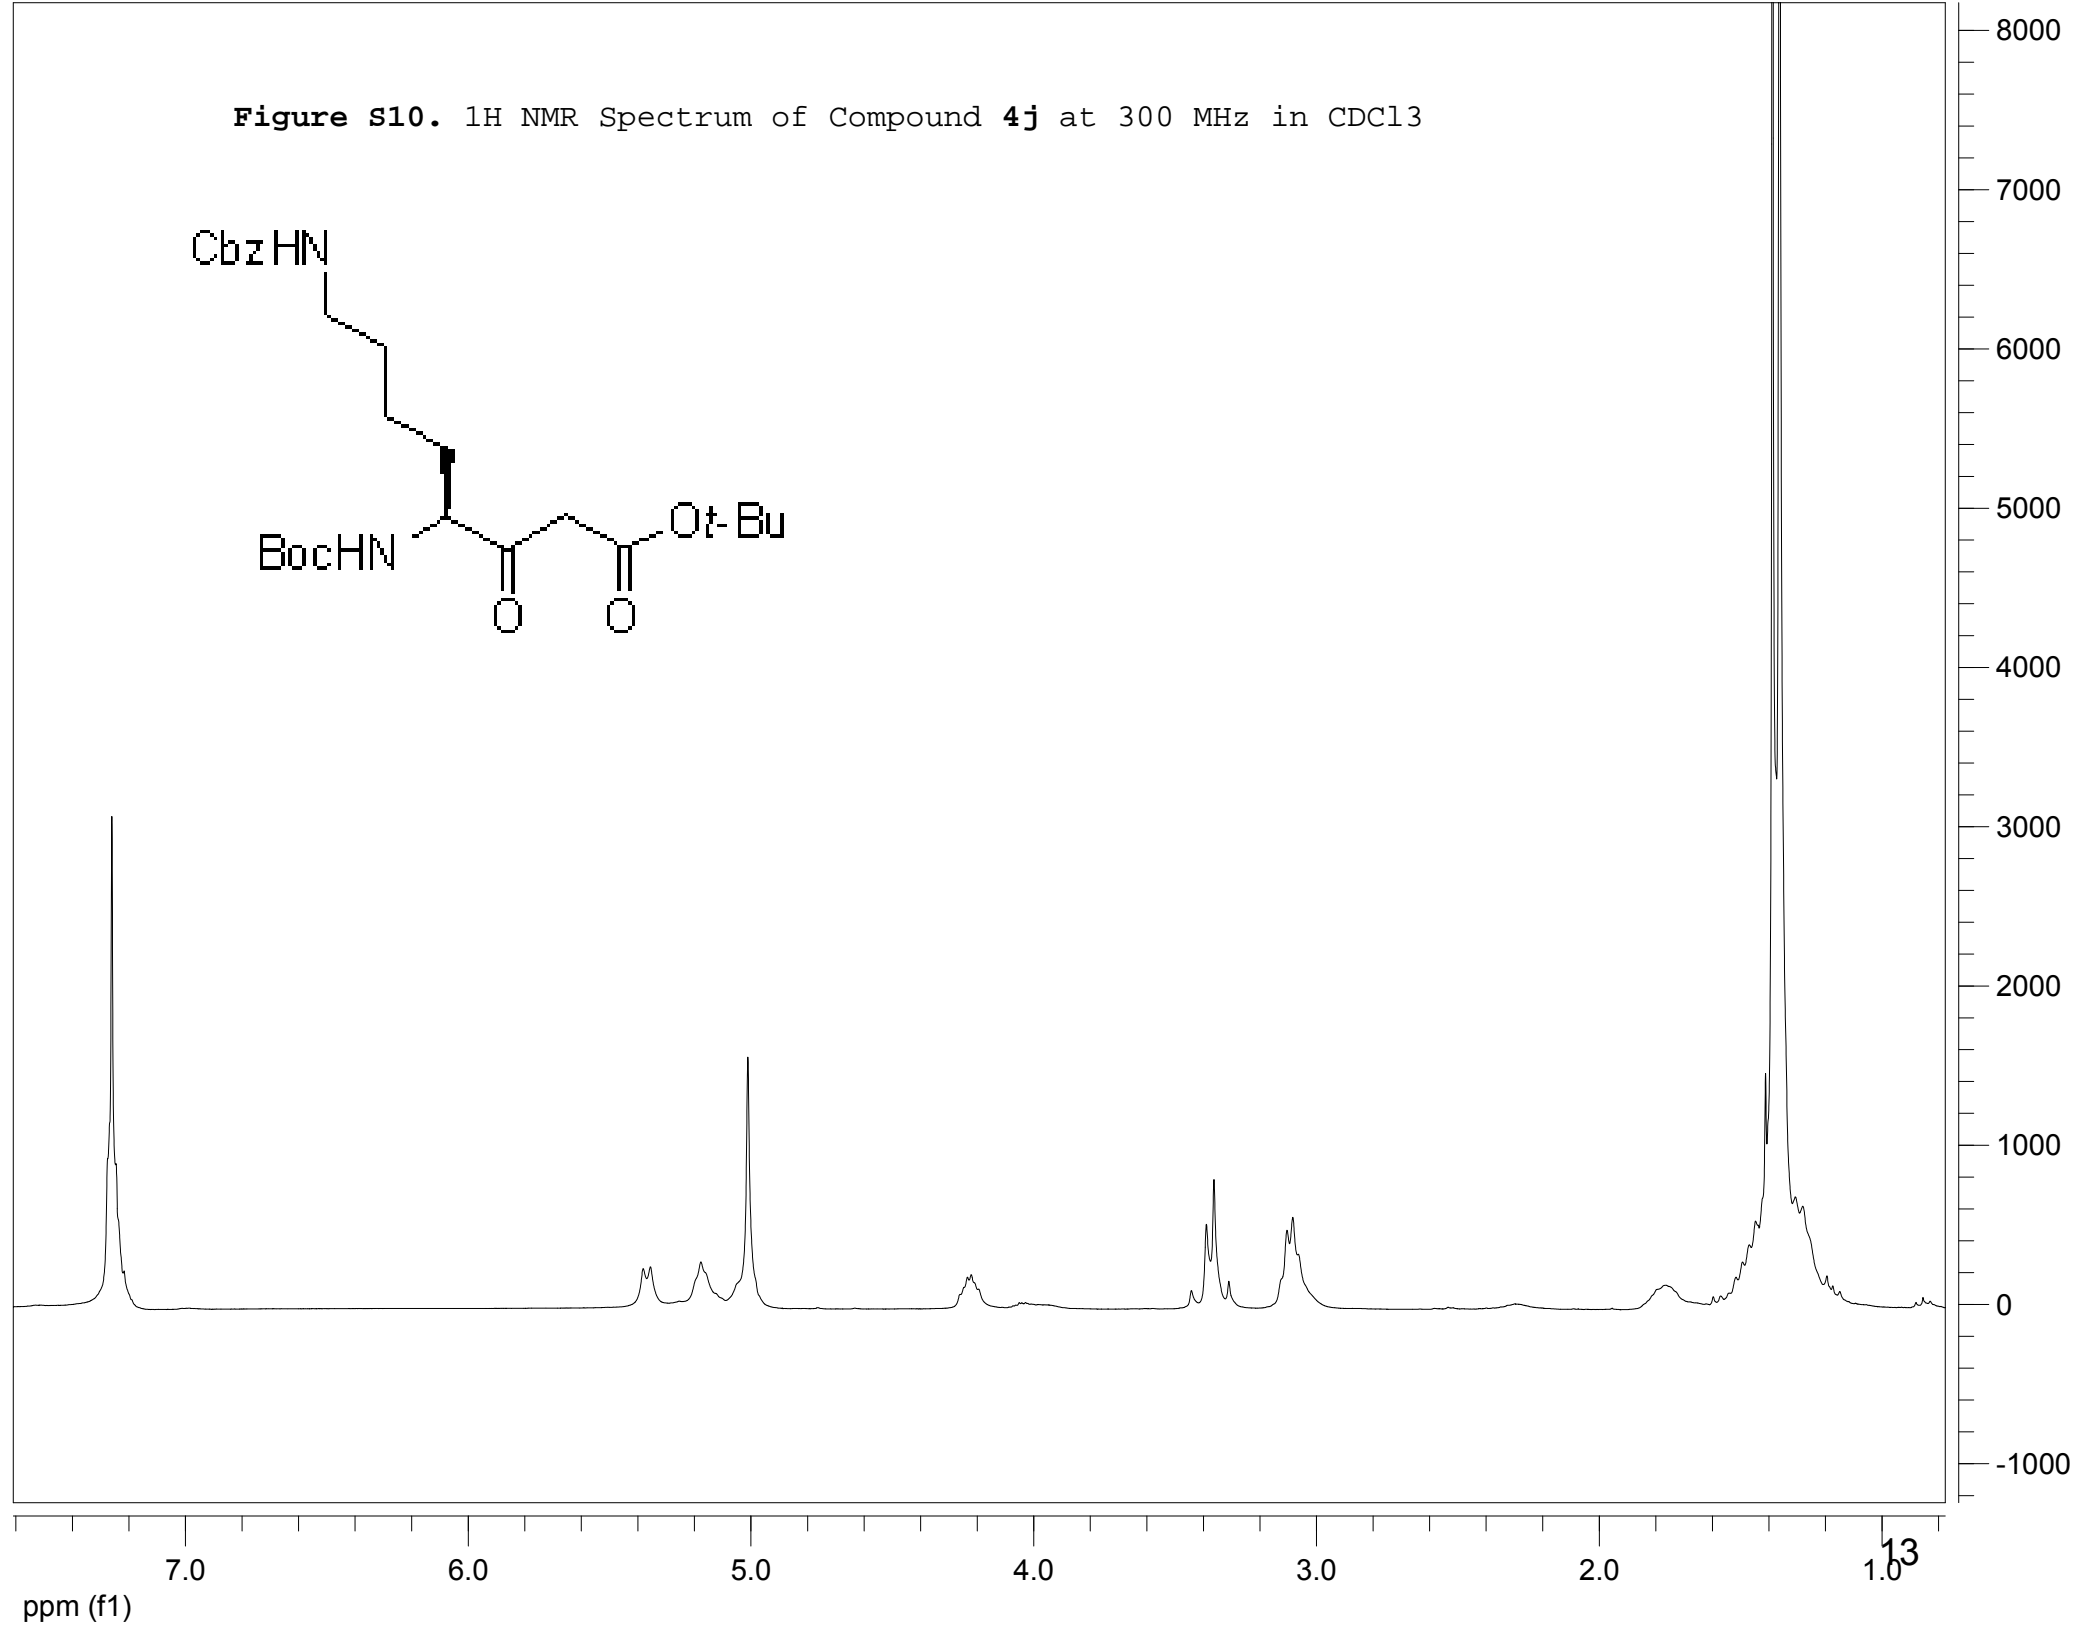

Figure S11. <sup>1</sup>H NMR Spectrum of Compound **4k** at 300 MHz in CDCl<sub>3</sub>

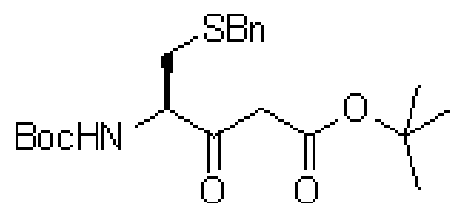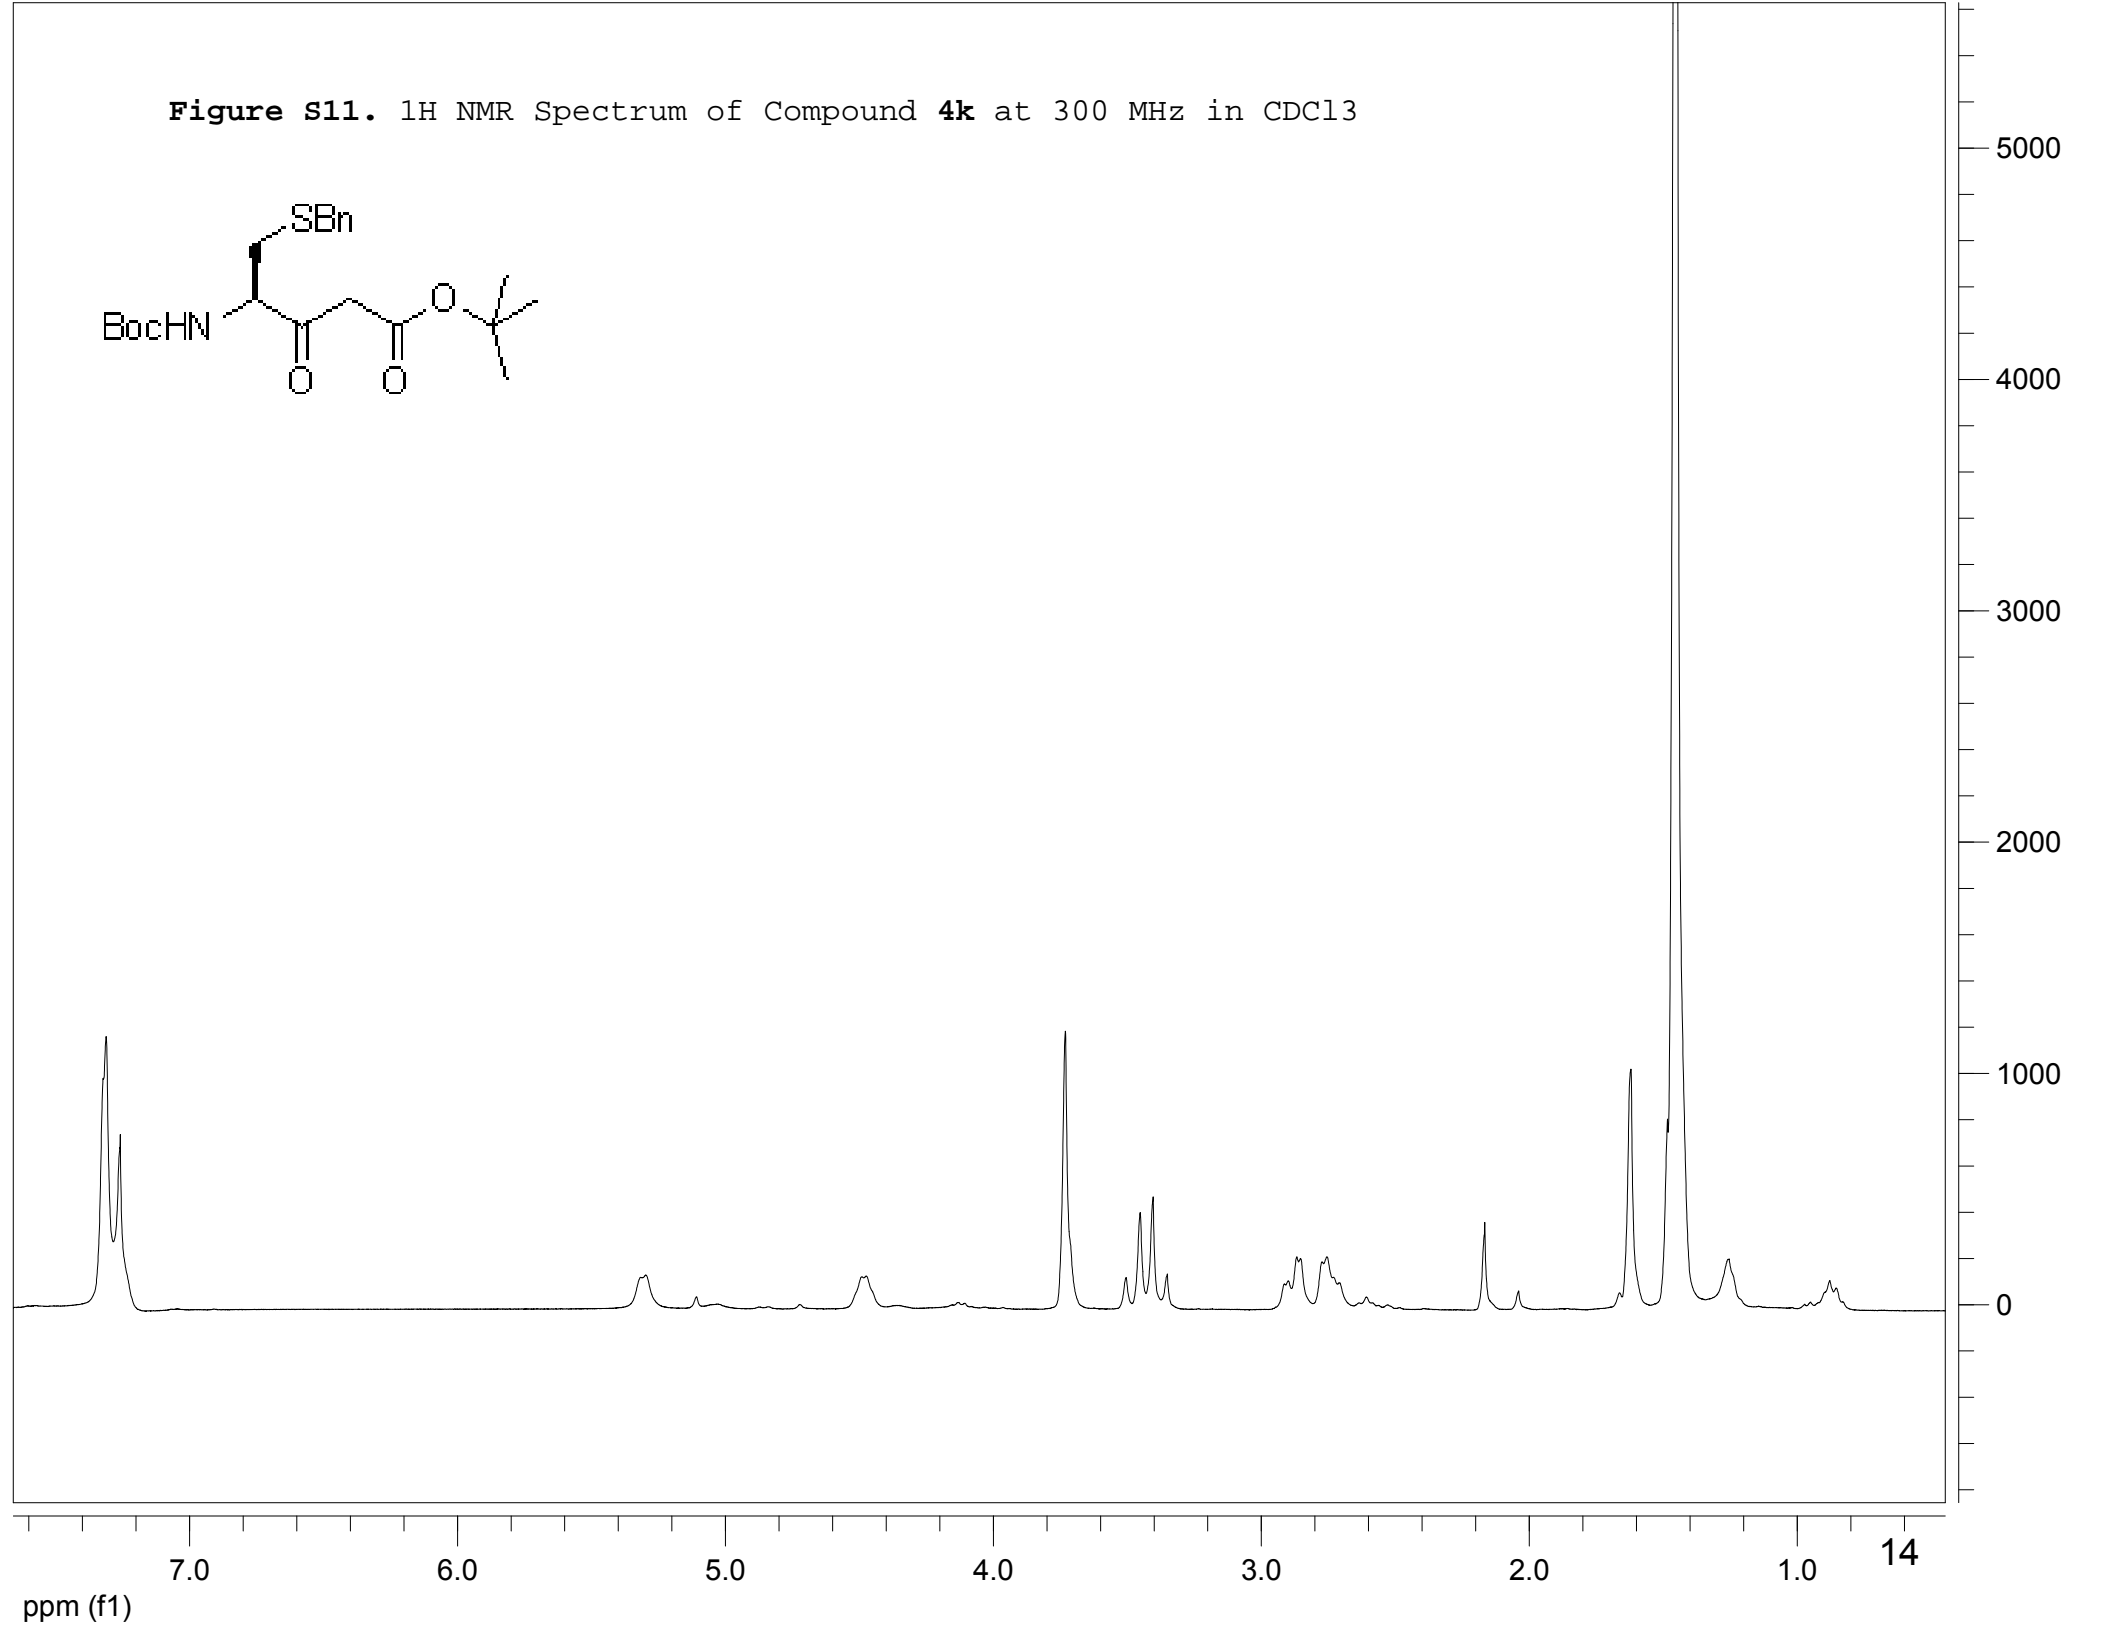

Figure S12. <sup>1</sup>H NMR Spectrum of Compound **41** at 300 MHz in CDCl<sub>3</sub>

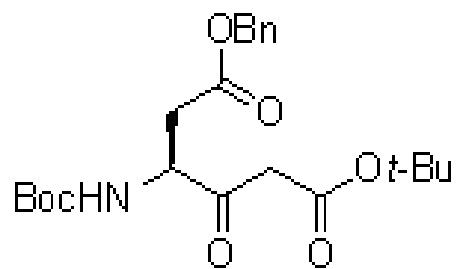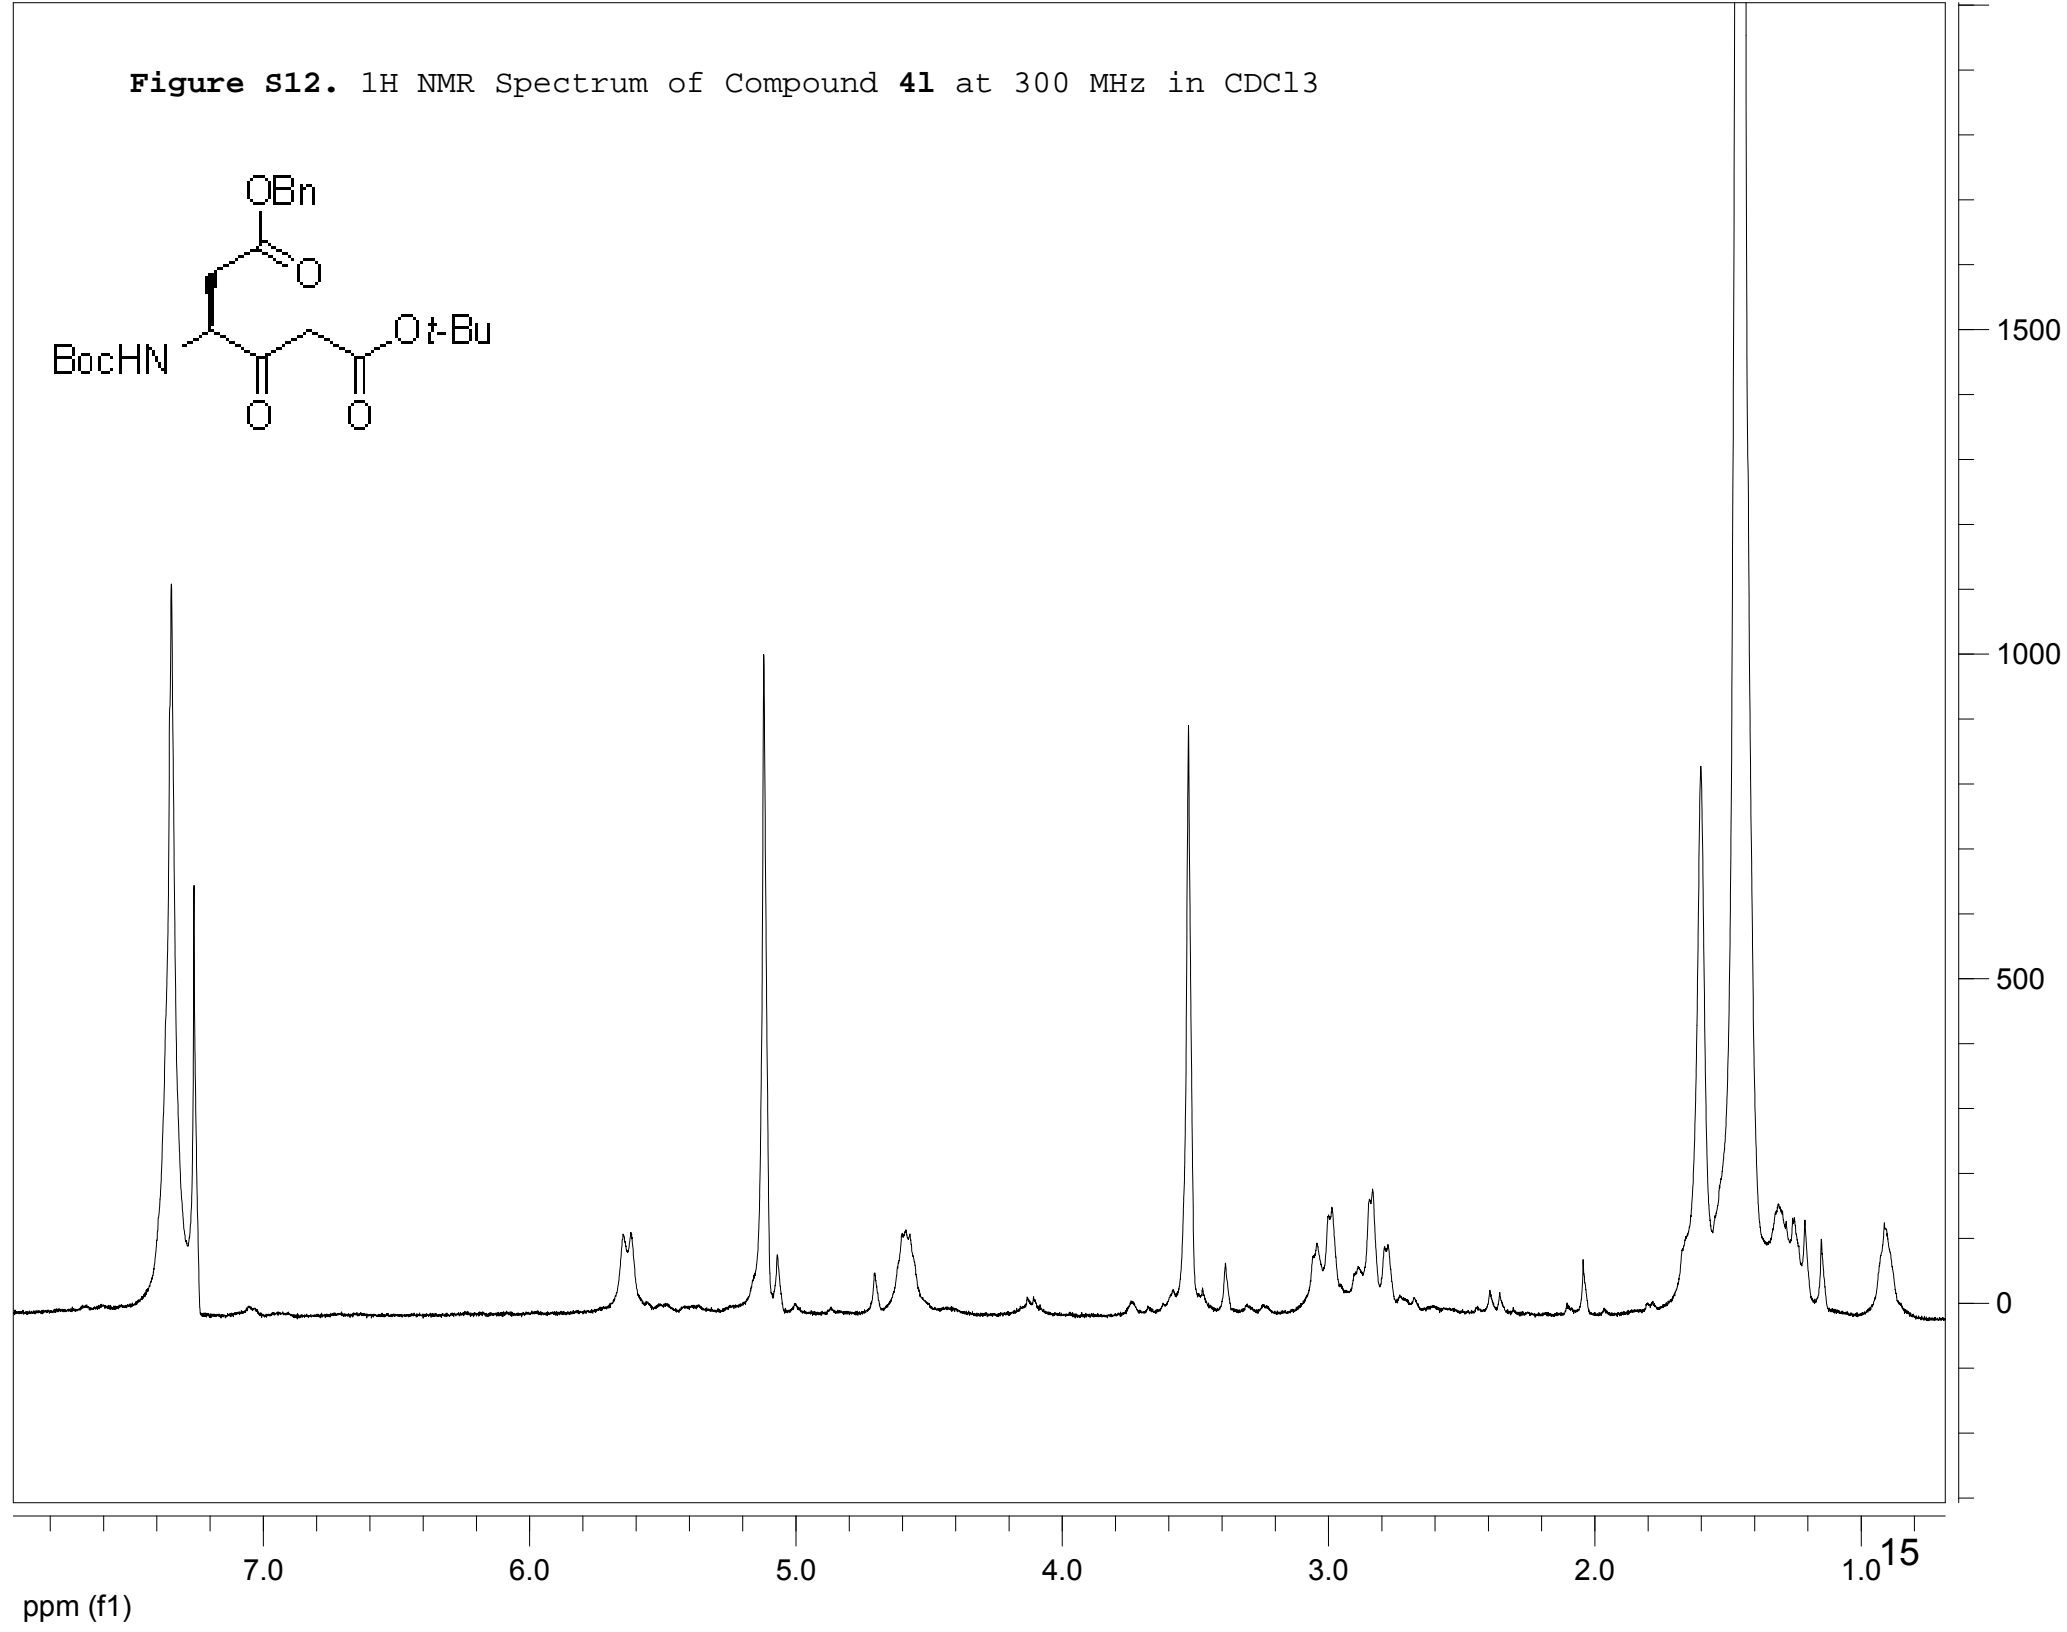

Figure S13. <sup>1</sup>H NMR Spectrum of Compound **4m** at 300 MHz in CDCl<sub>3</sub>

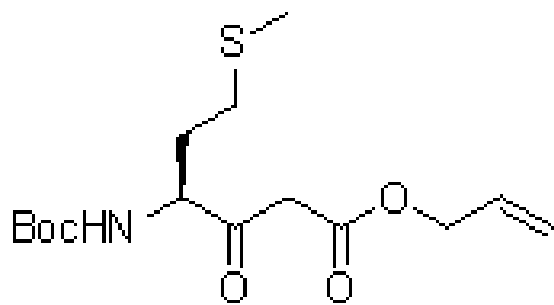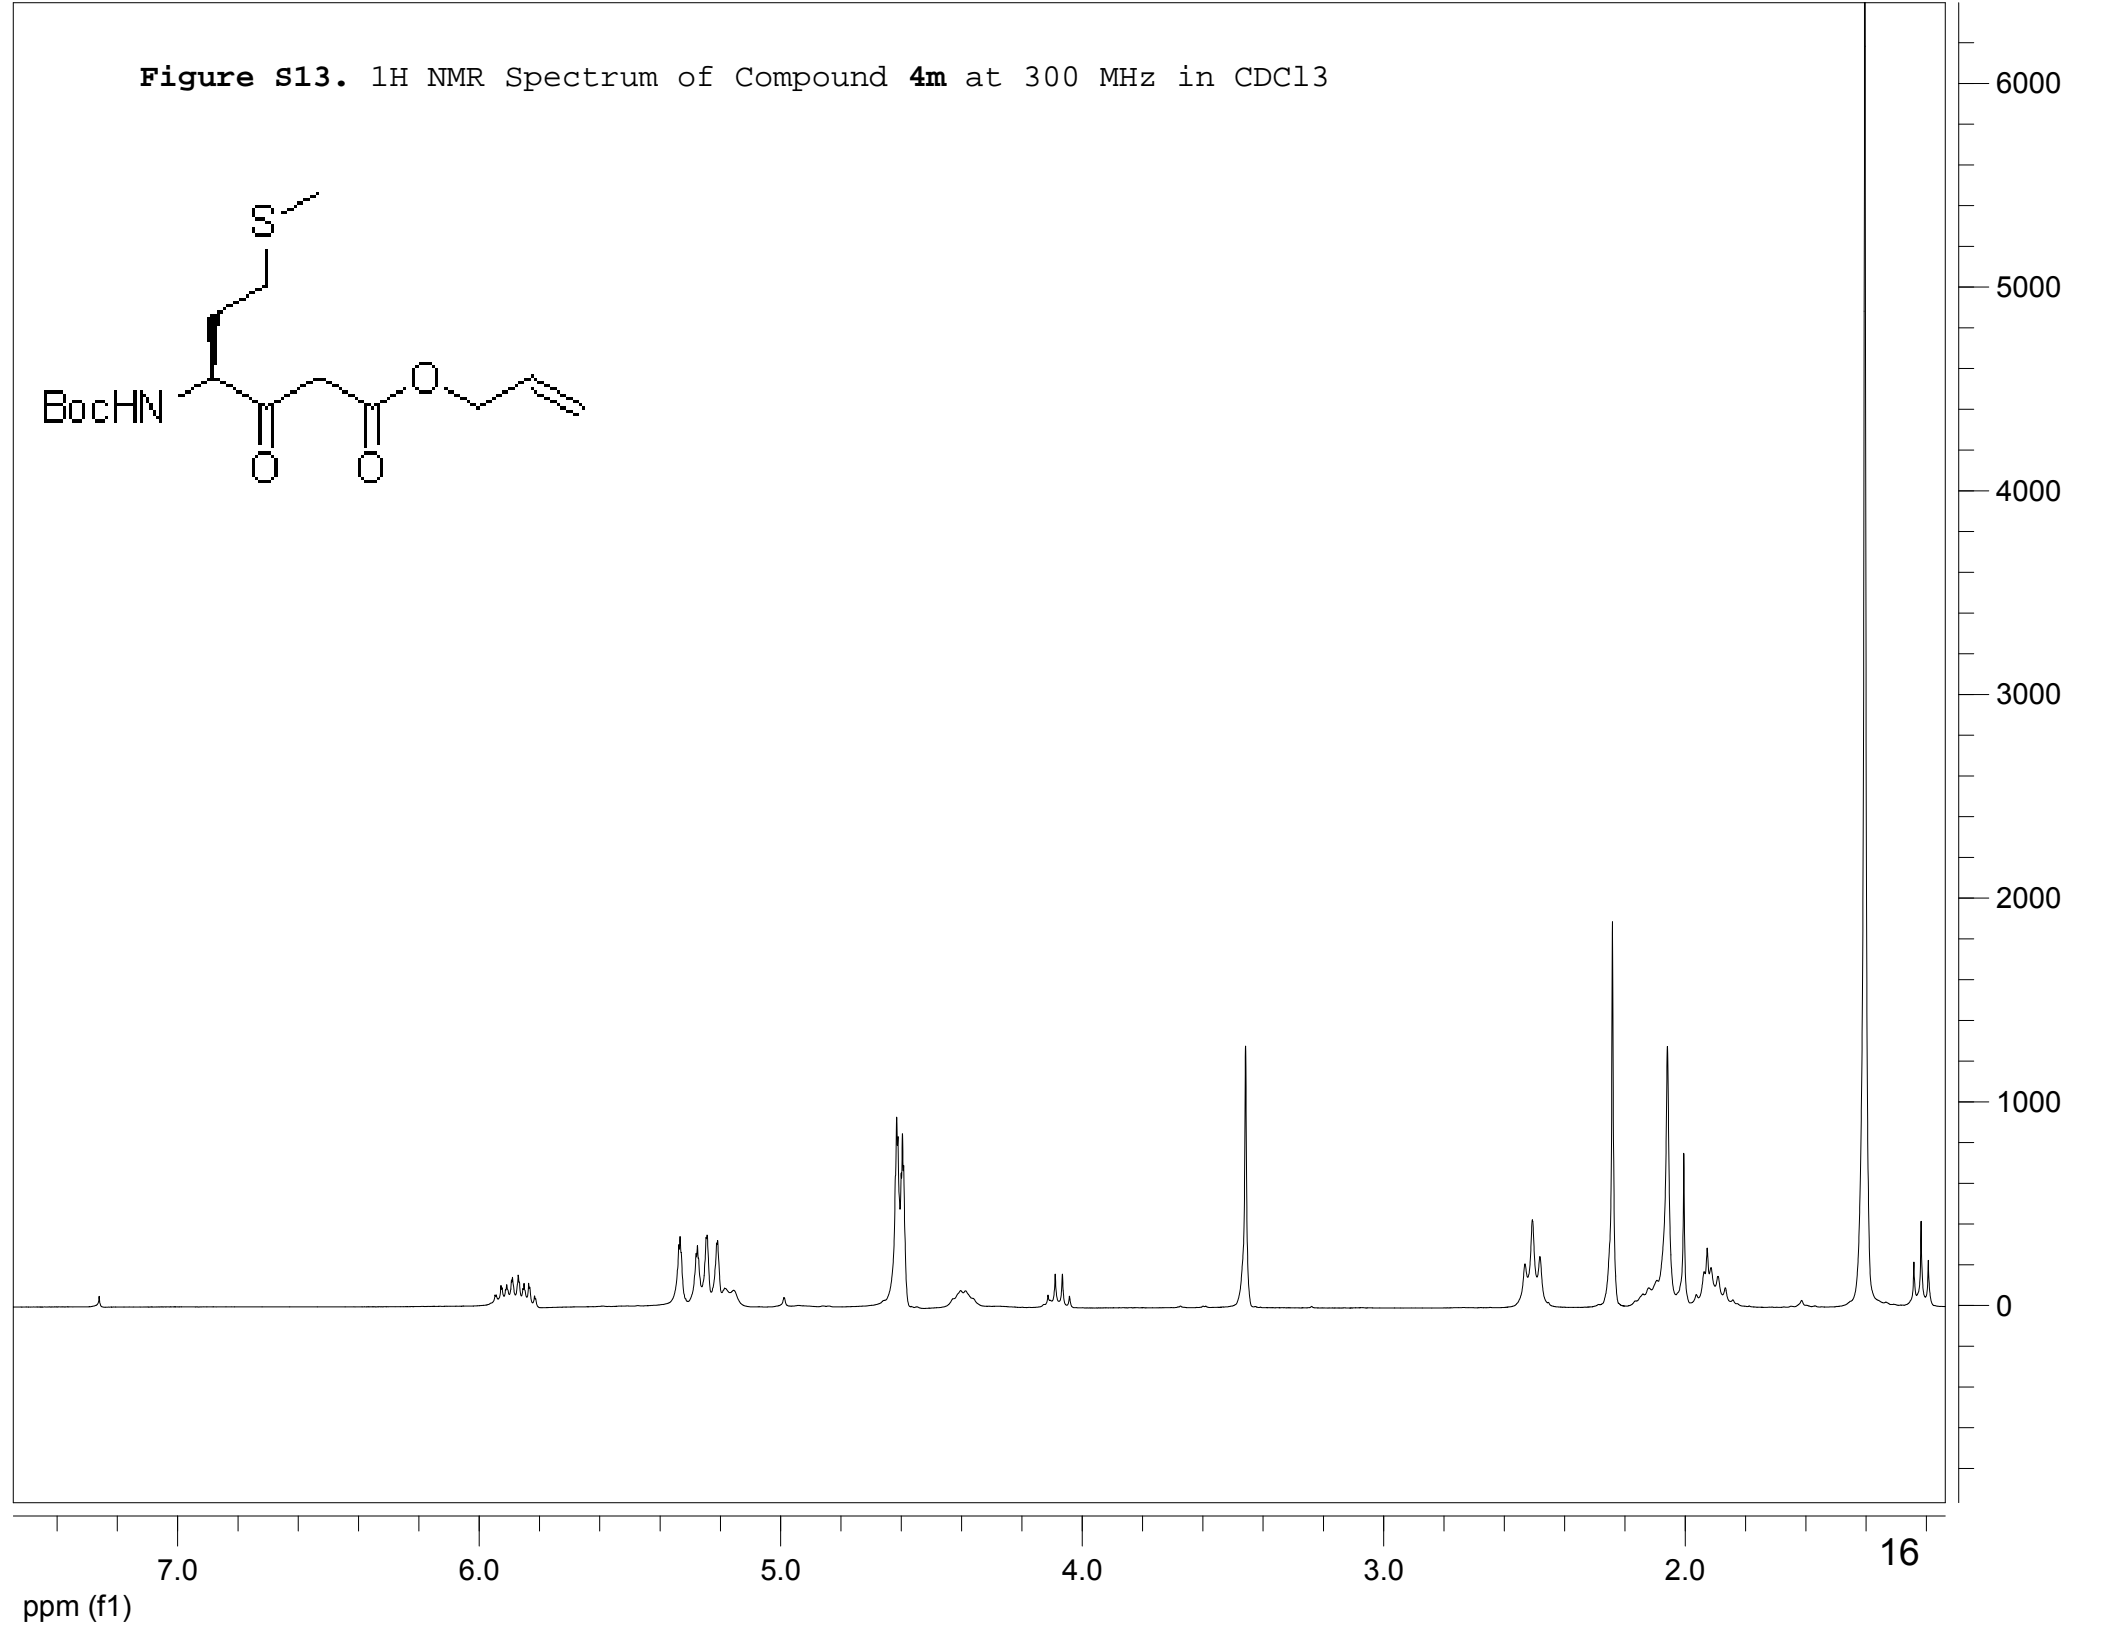



Figure S14. <sup>1</sup>H NMR Spectrum of Compound **4n** at 300 MHz in CDCl<sub>3</sub>

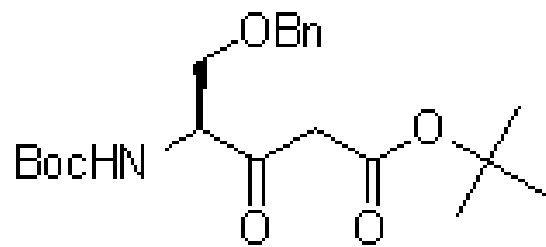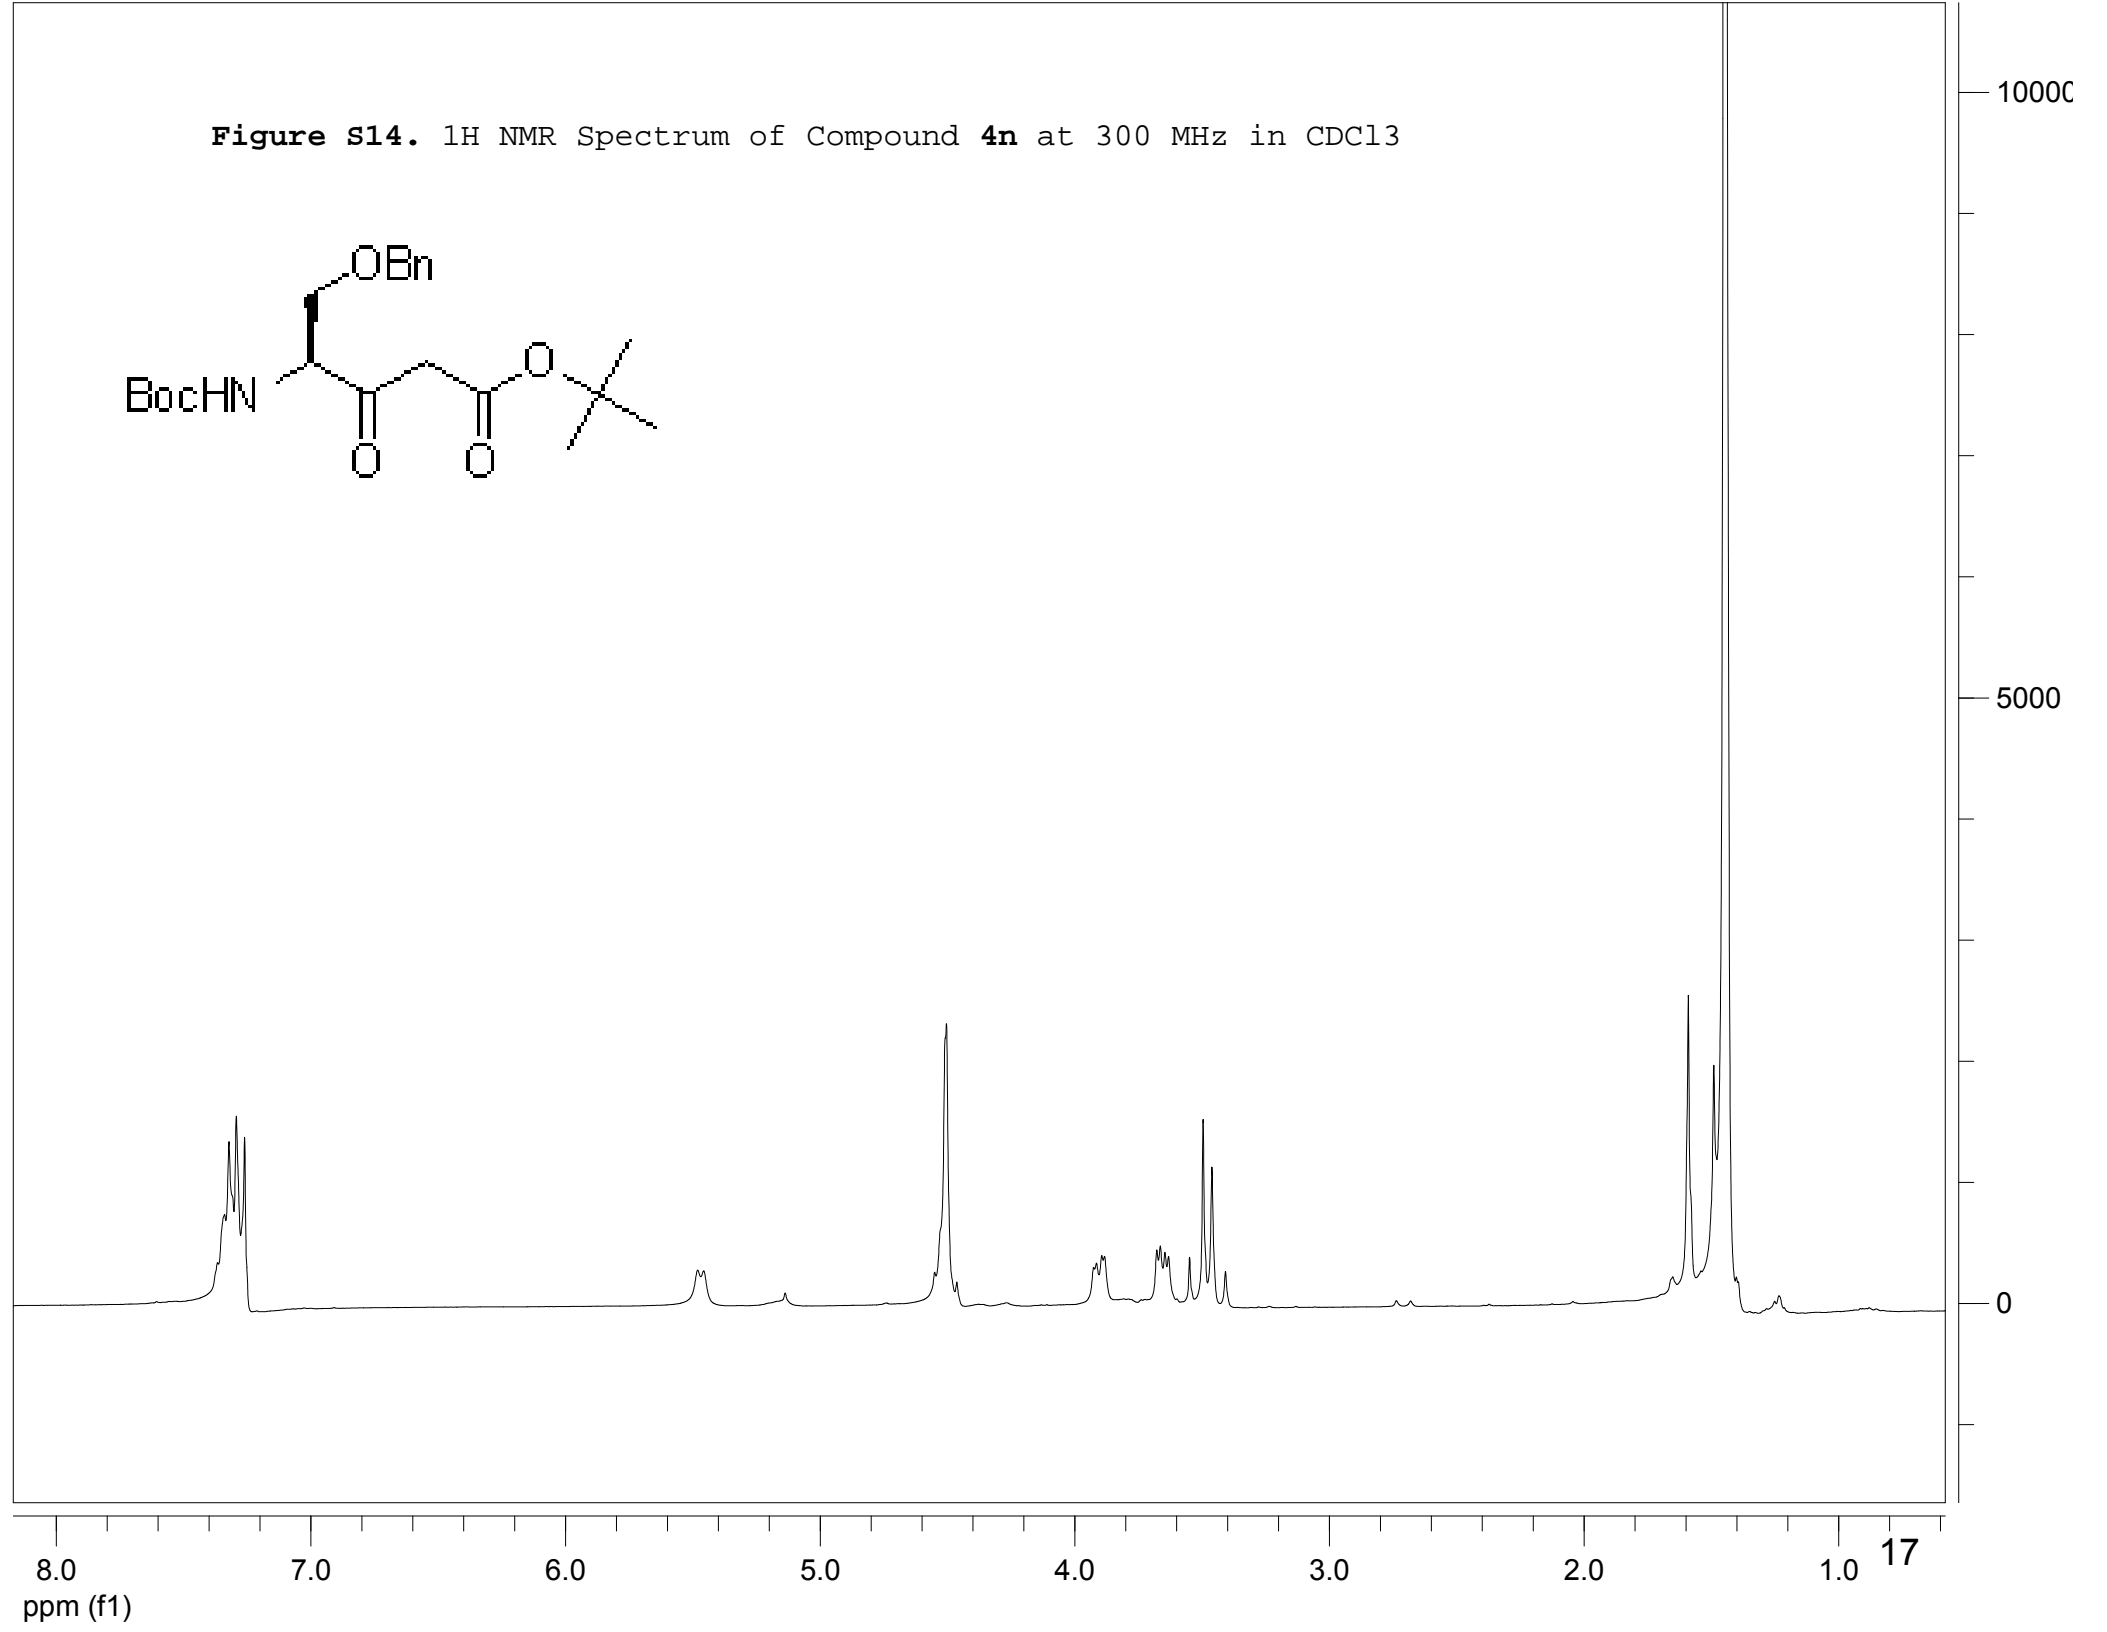

Figure S15. <sup>1</sup>H NMR Spectrum of Compound 4o at 300 MHz in CDCl<sub>3</sub>

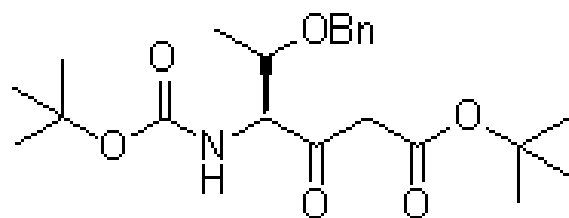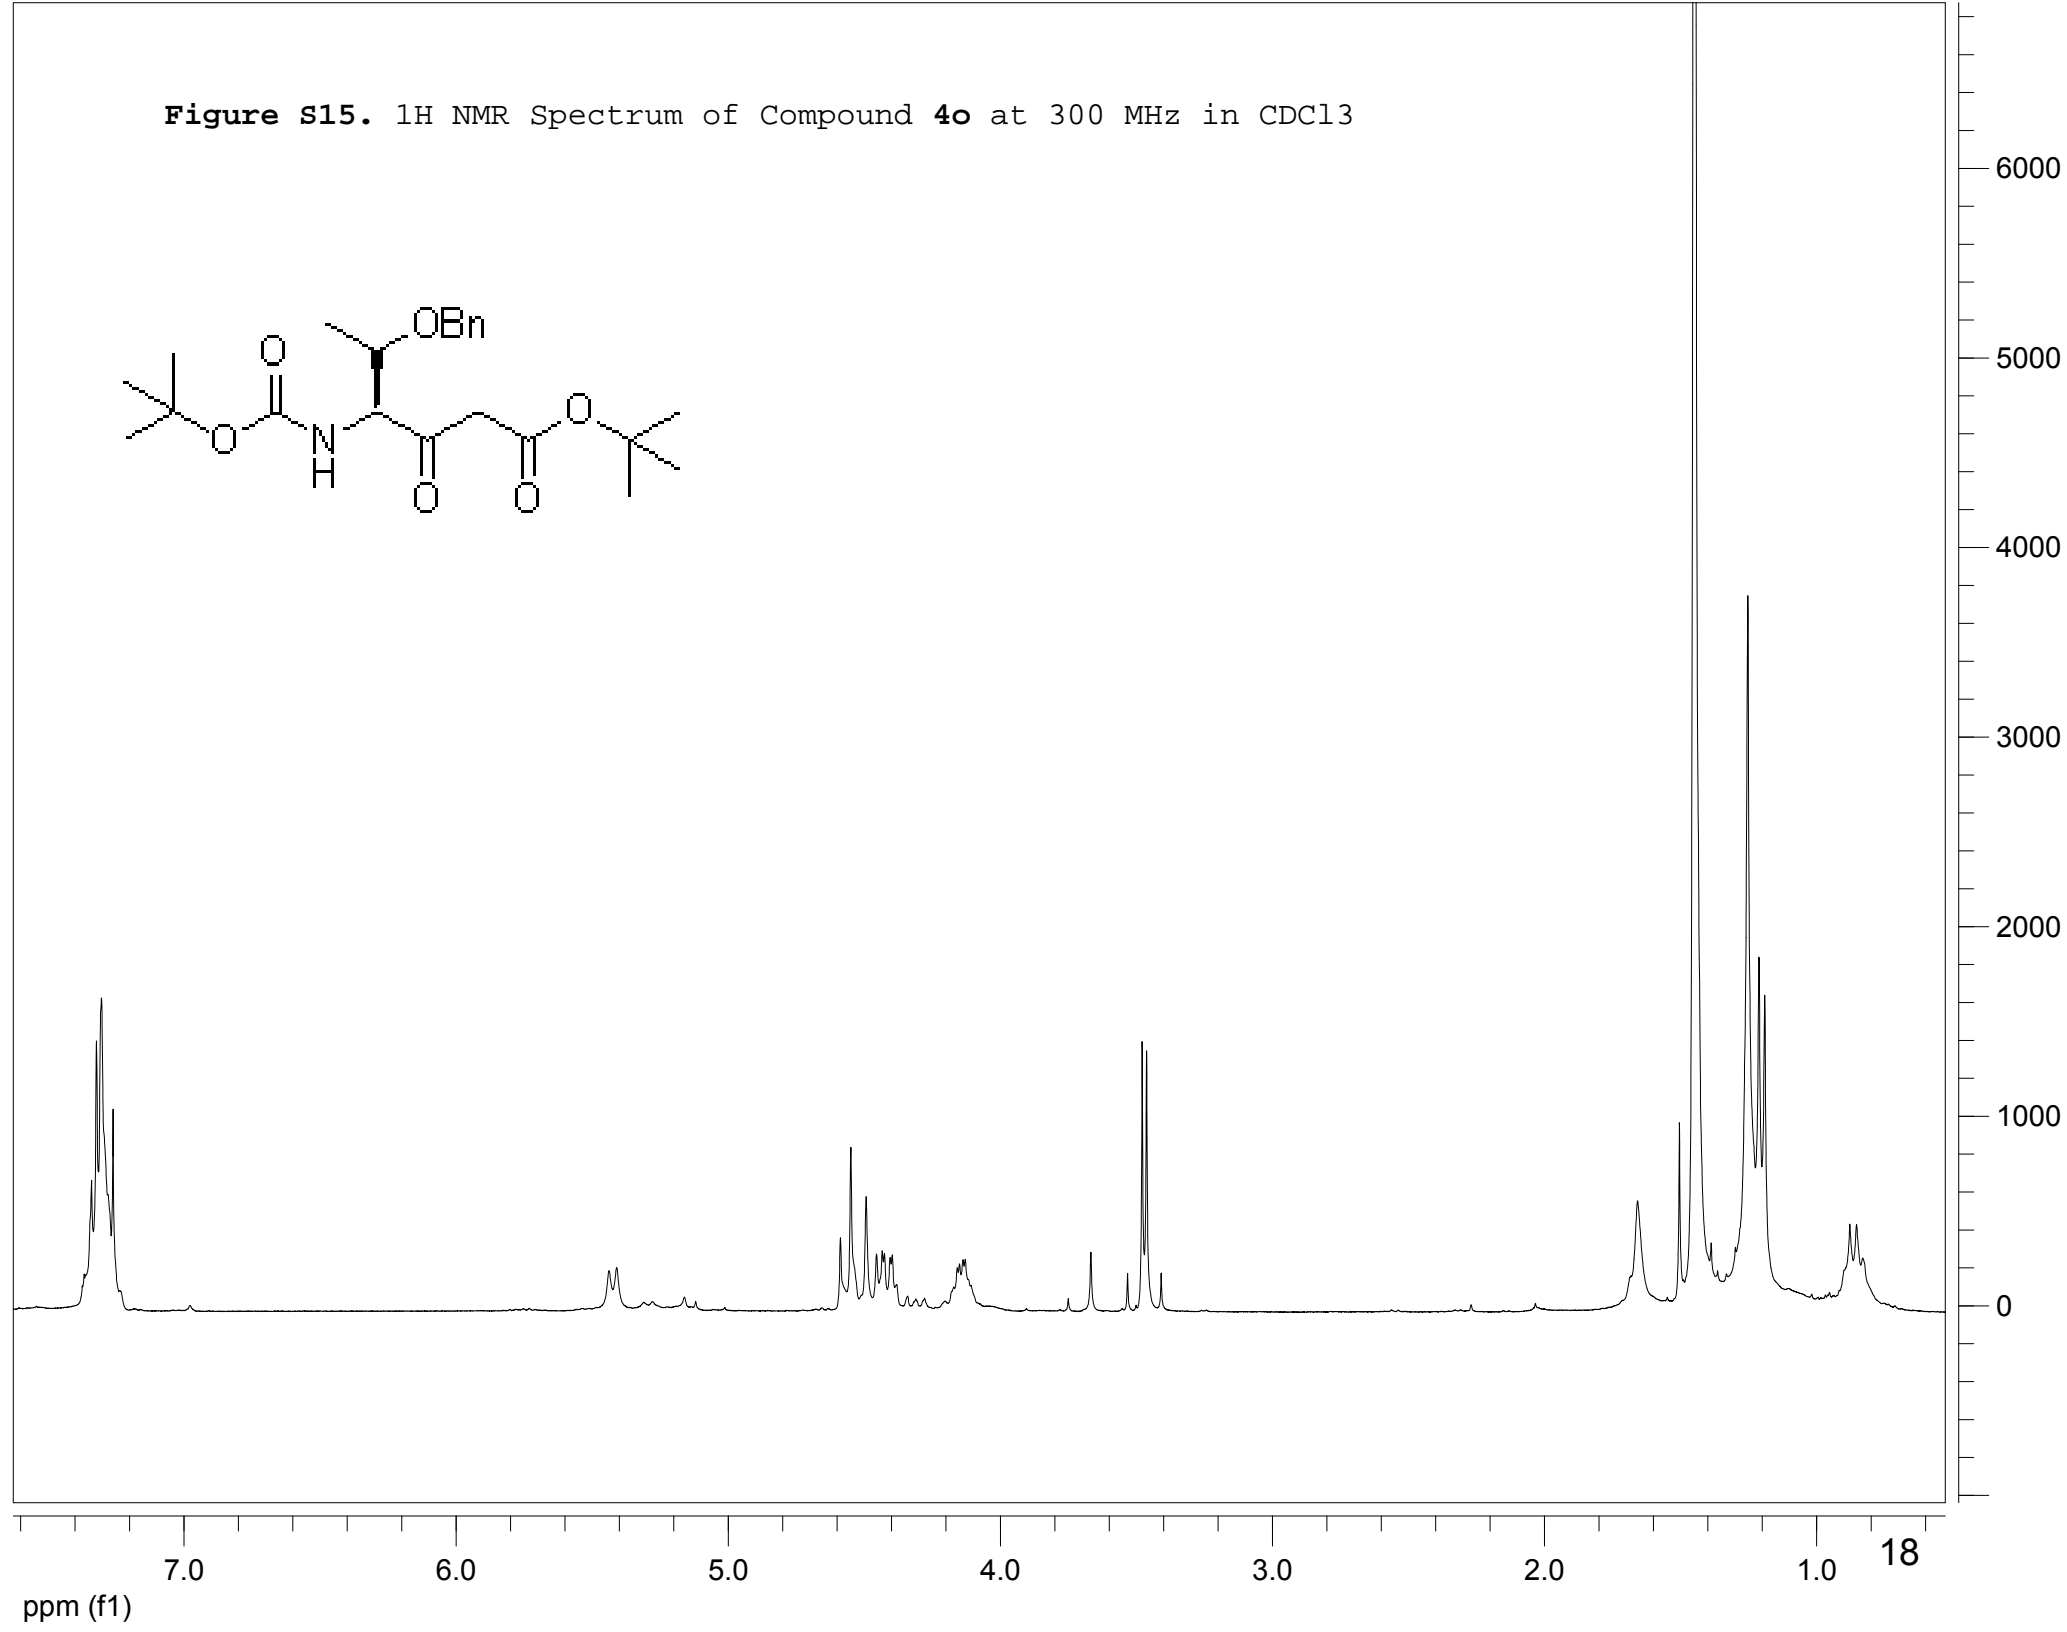

Figure S16. <sup>1</sup>H NMR Spectrum of Compound **4p** at 300 MHz in CDCl<sub>3</sub>

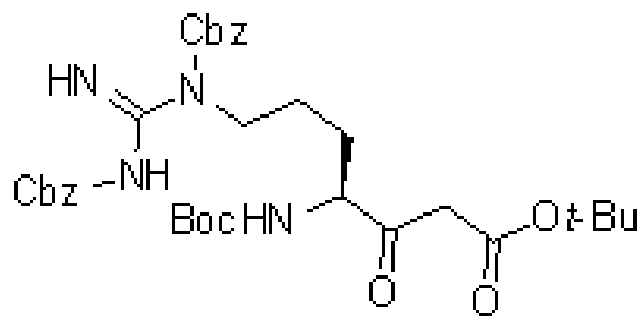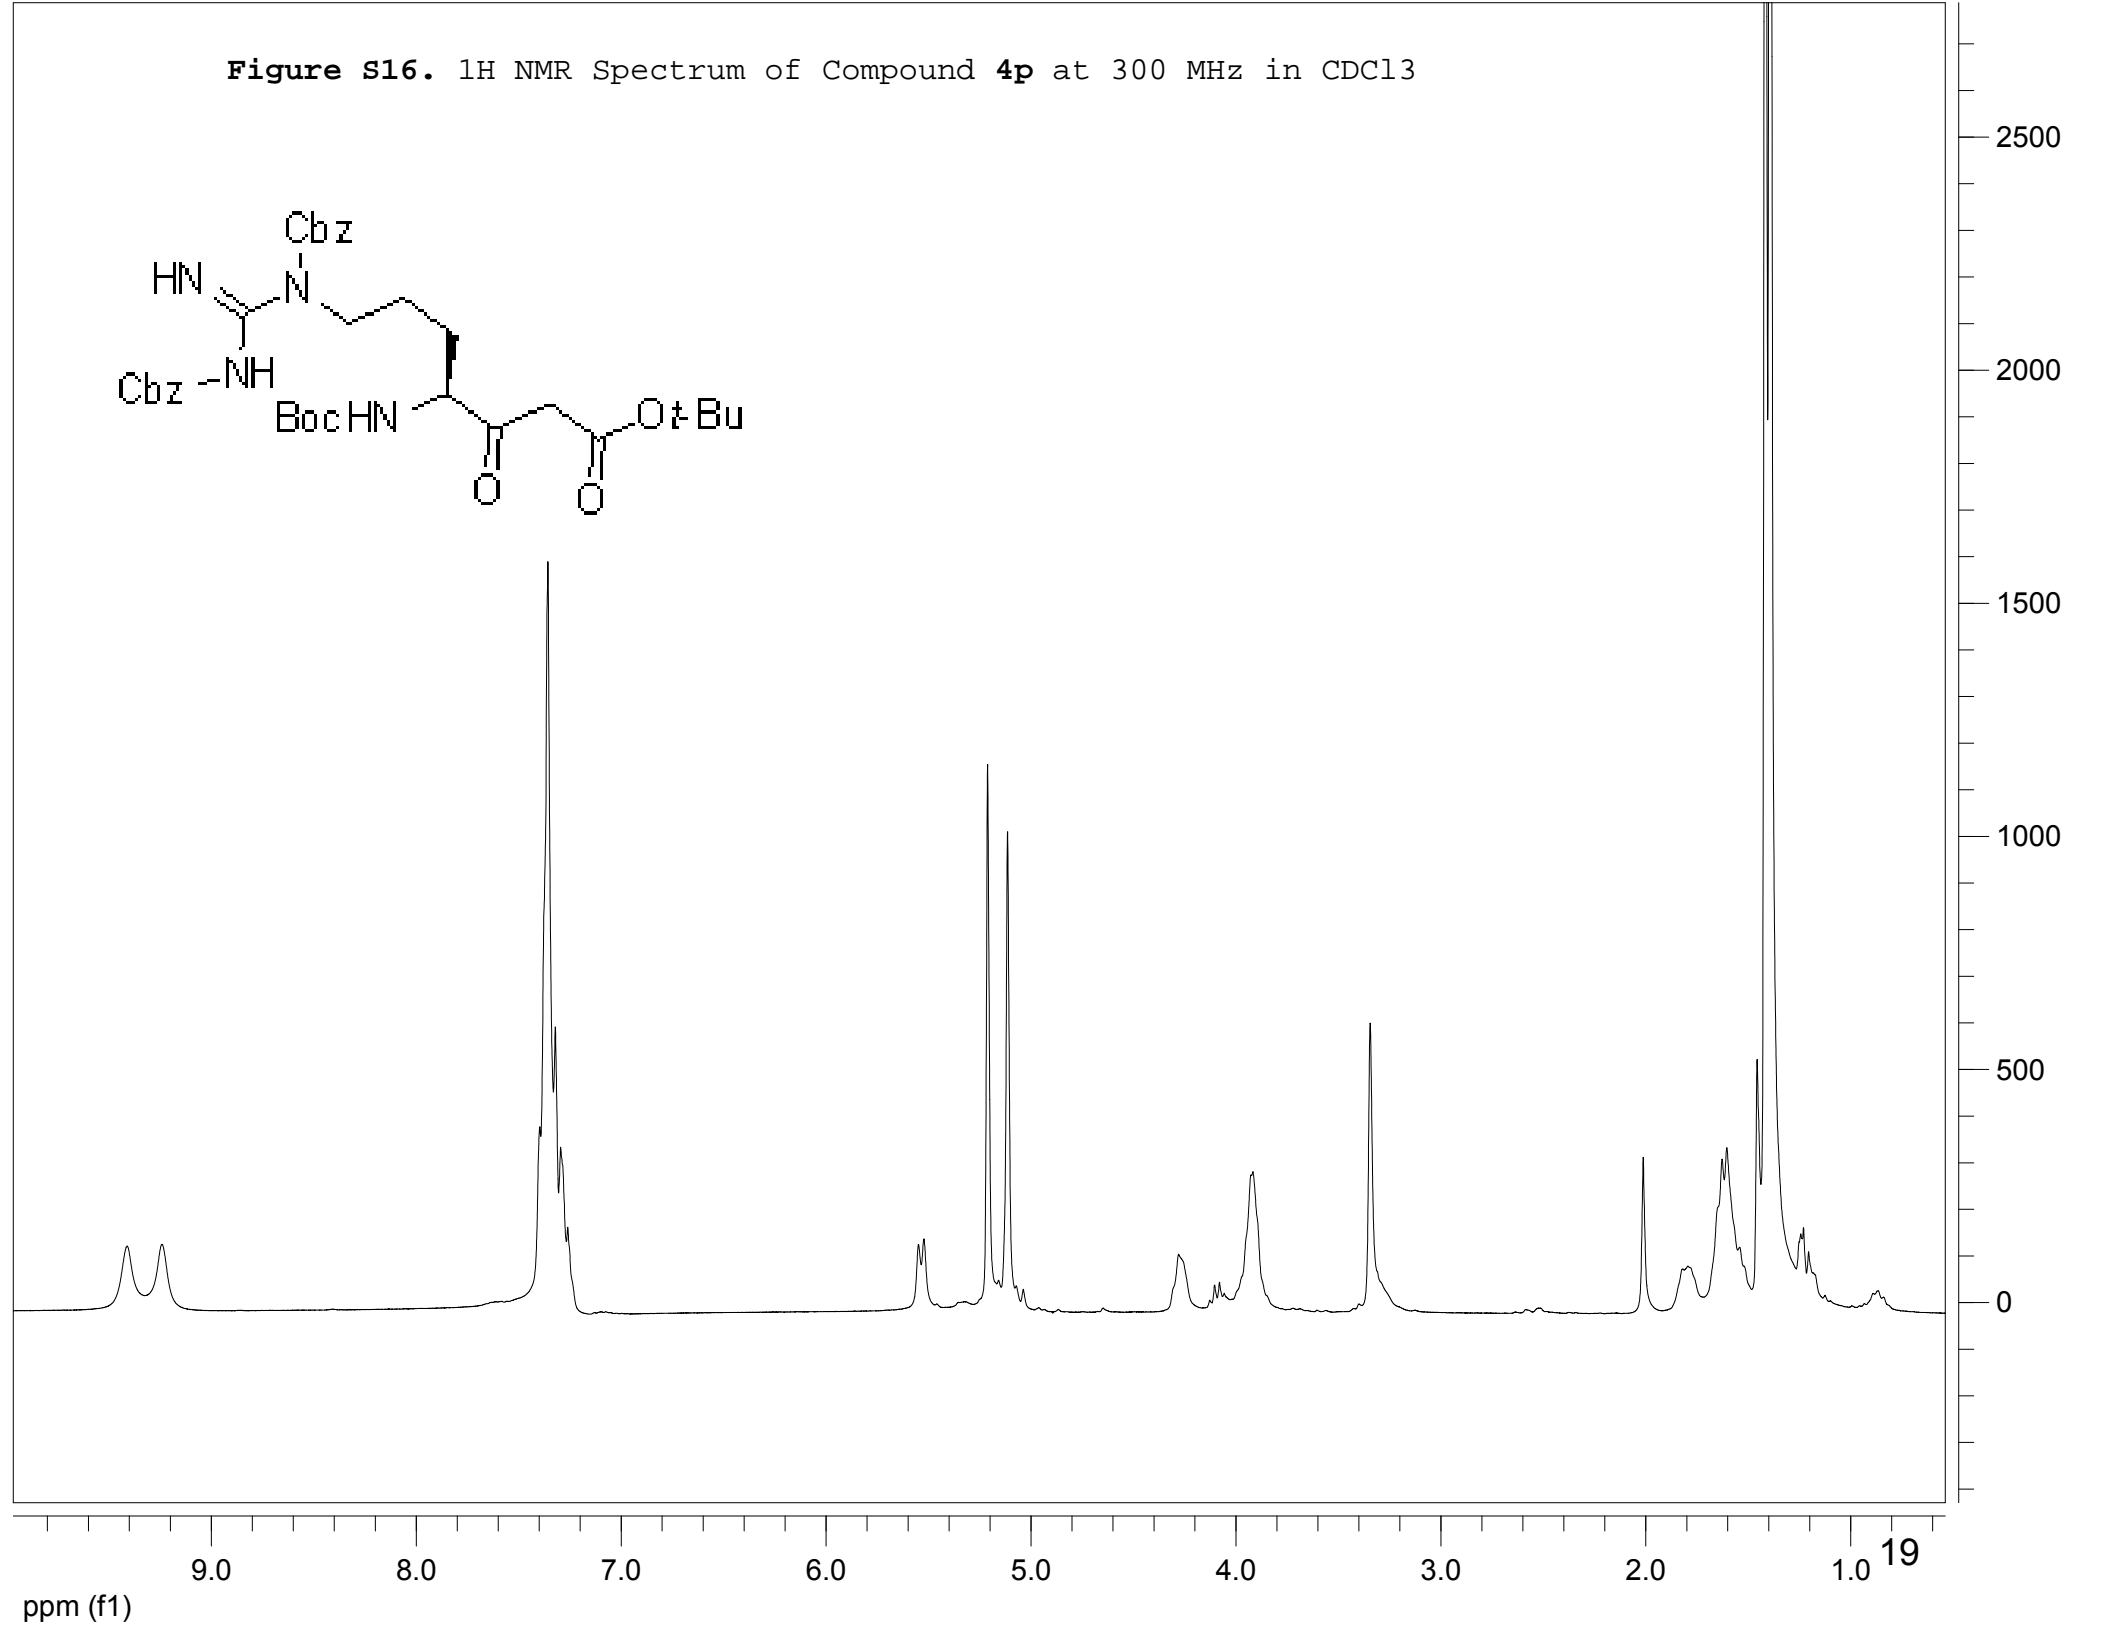

Figure S17. <sup>1</sup>H NMR Spectrum of Compound **4g** at 300 MHz in CDCl<sub>3</sub>

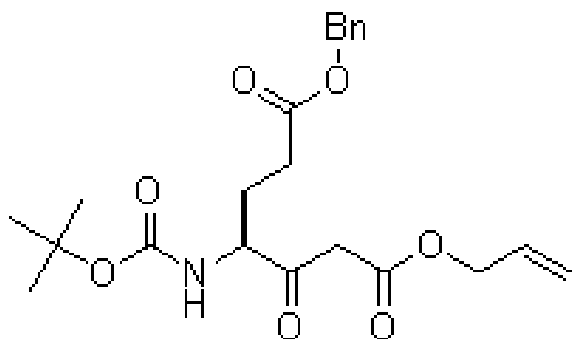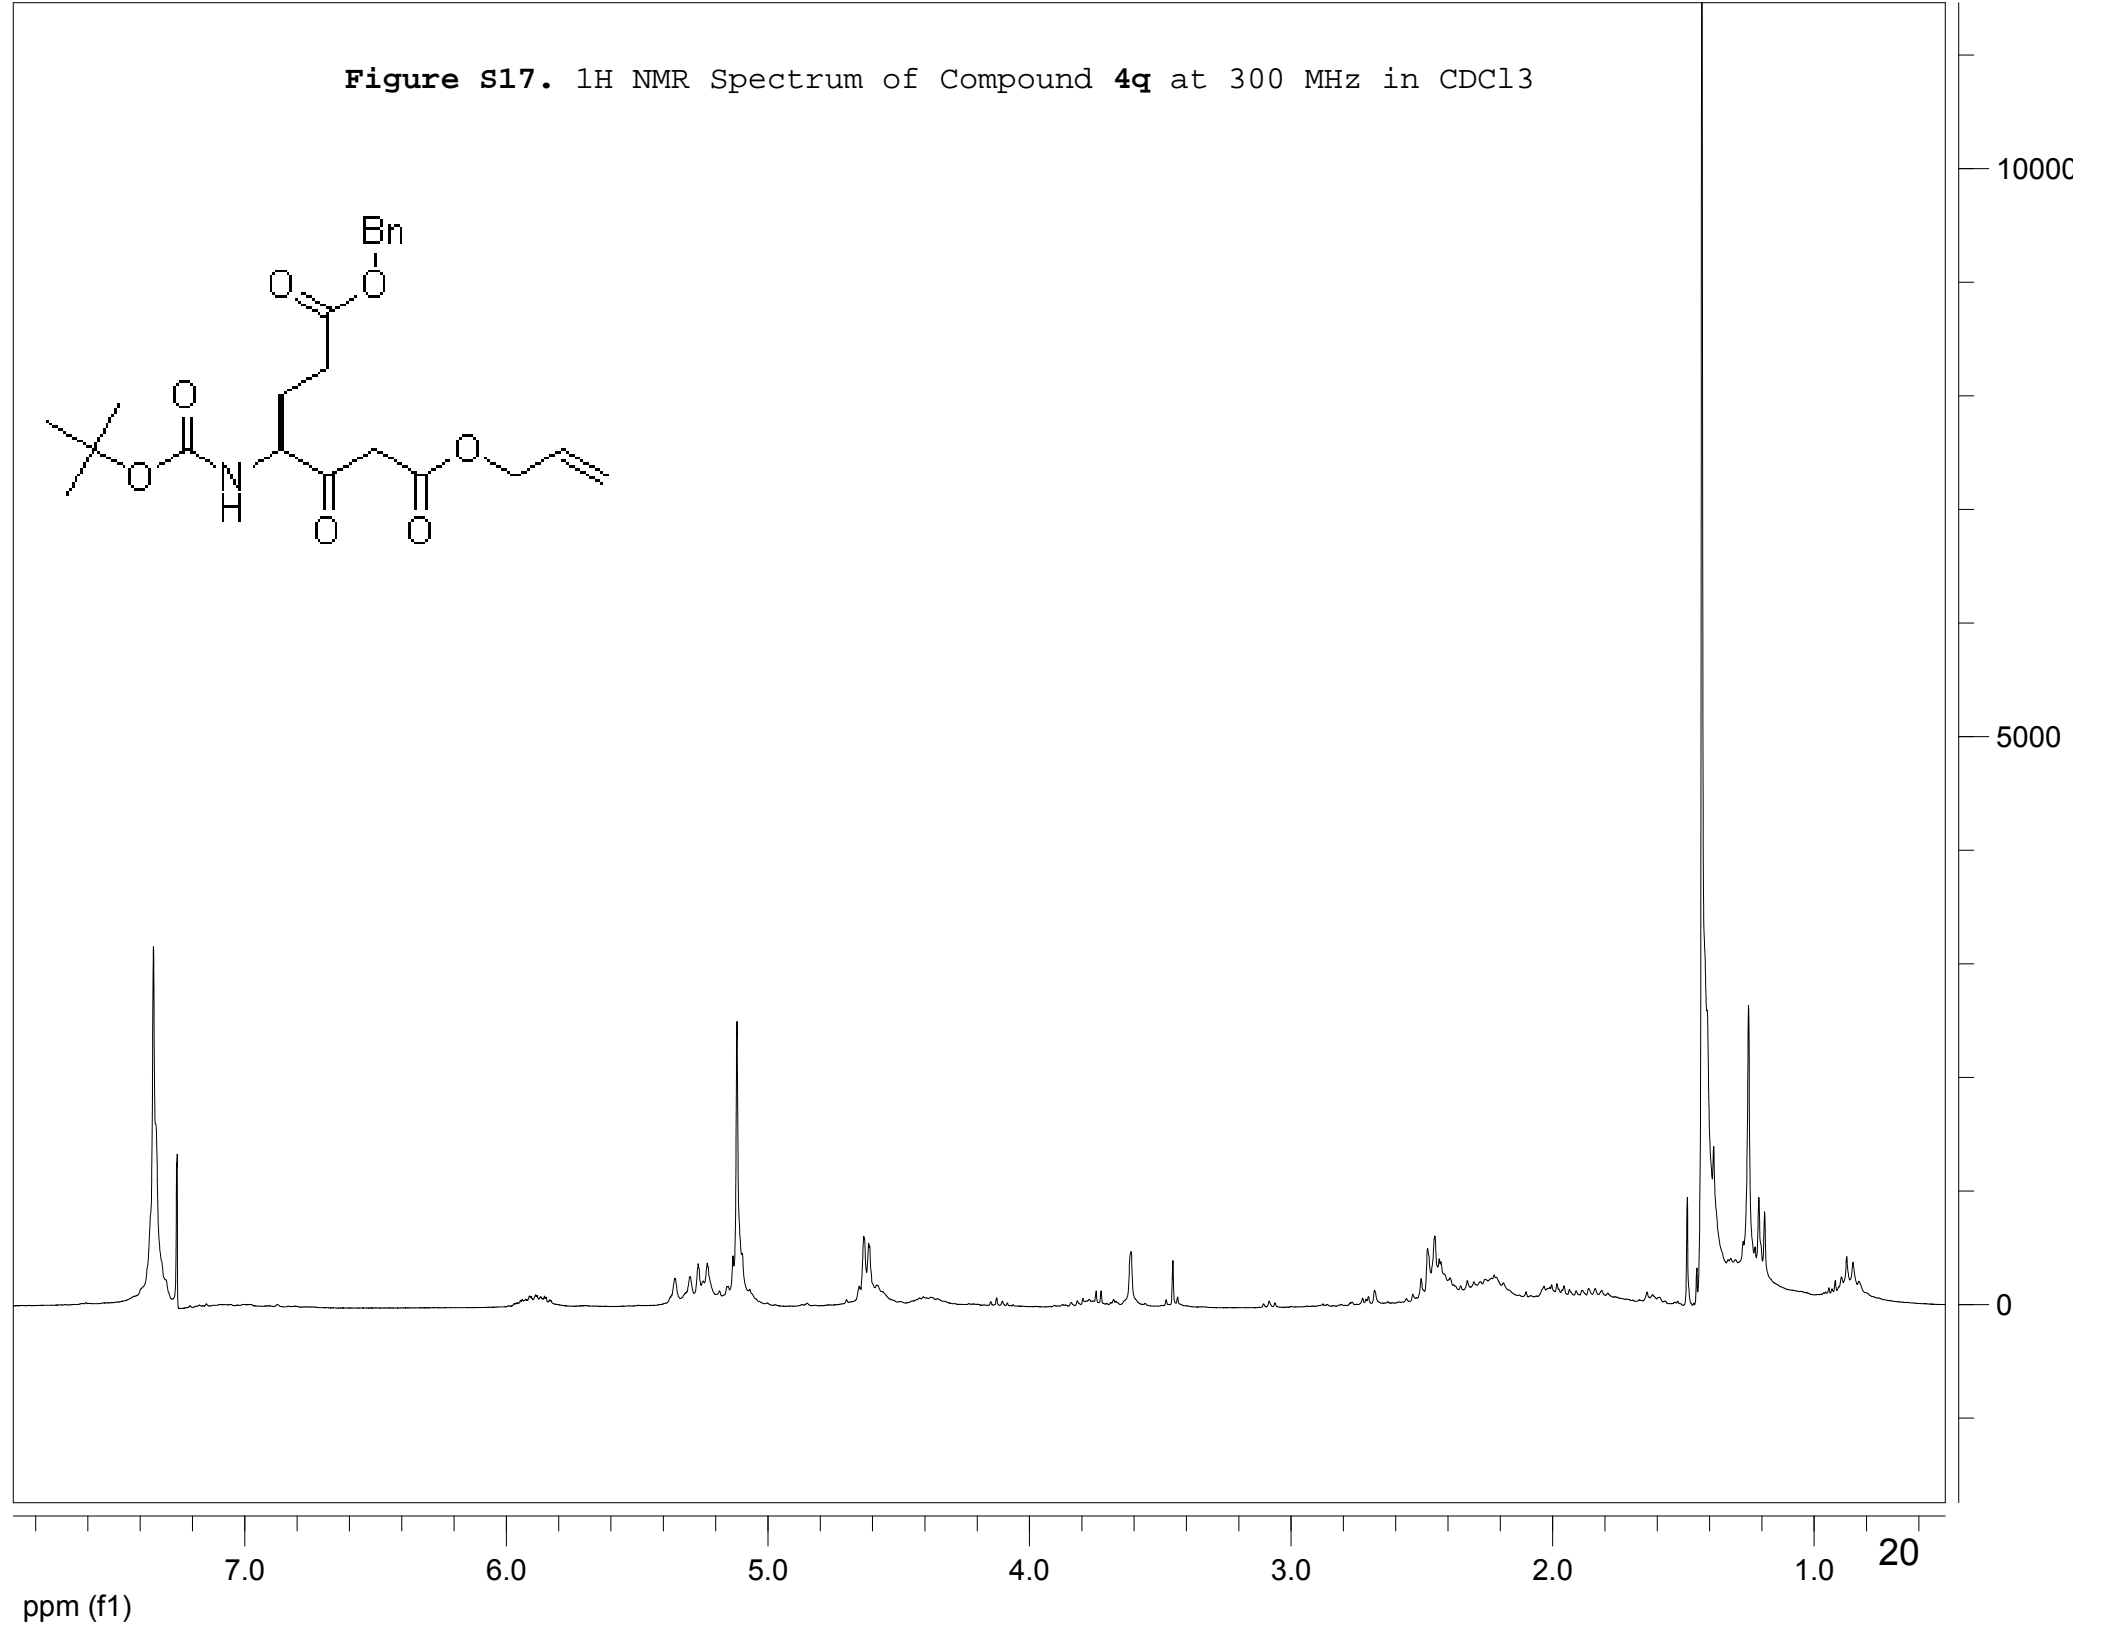

Figure S18. <sup>1</sup>H NMR Spectrum of Compound **4r** at 300 MHz in CDCl<sub>3</sub>

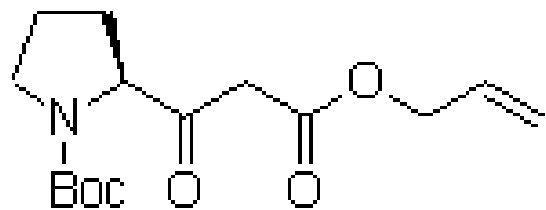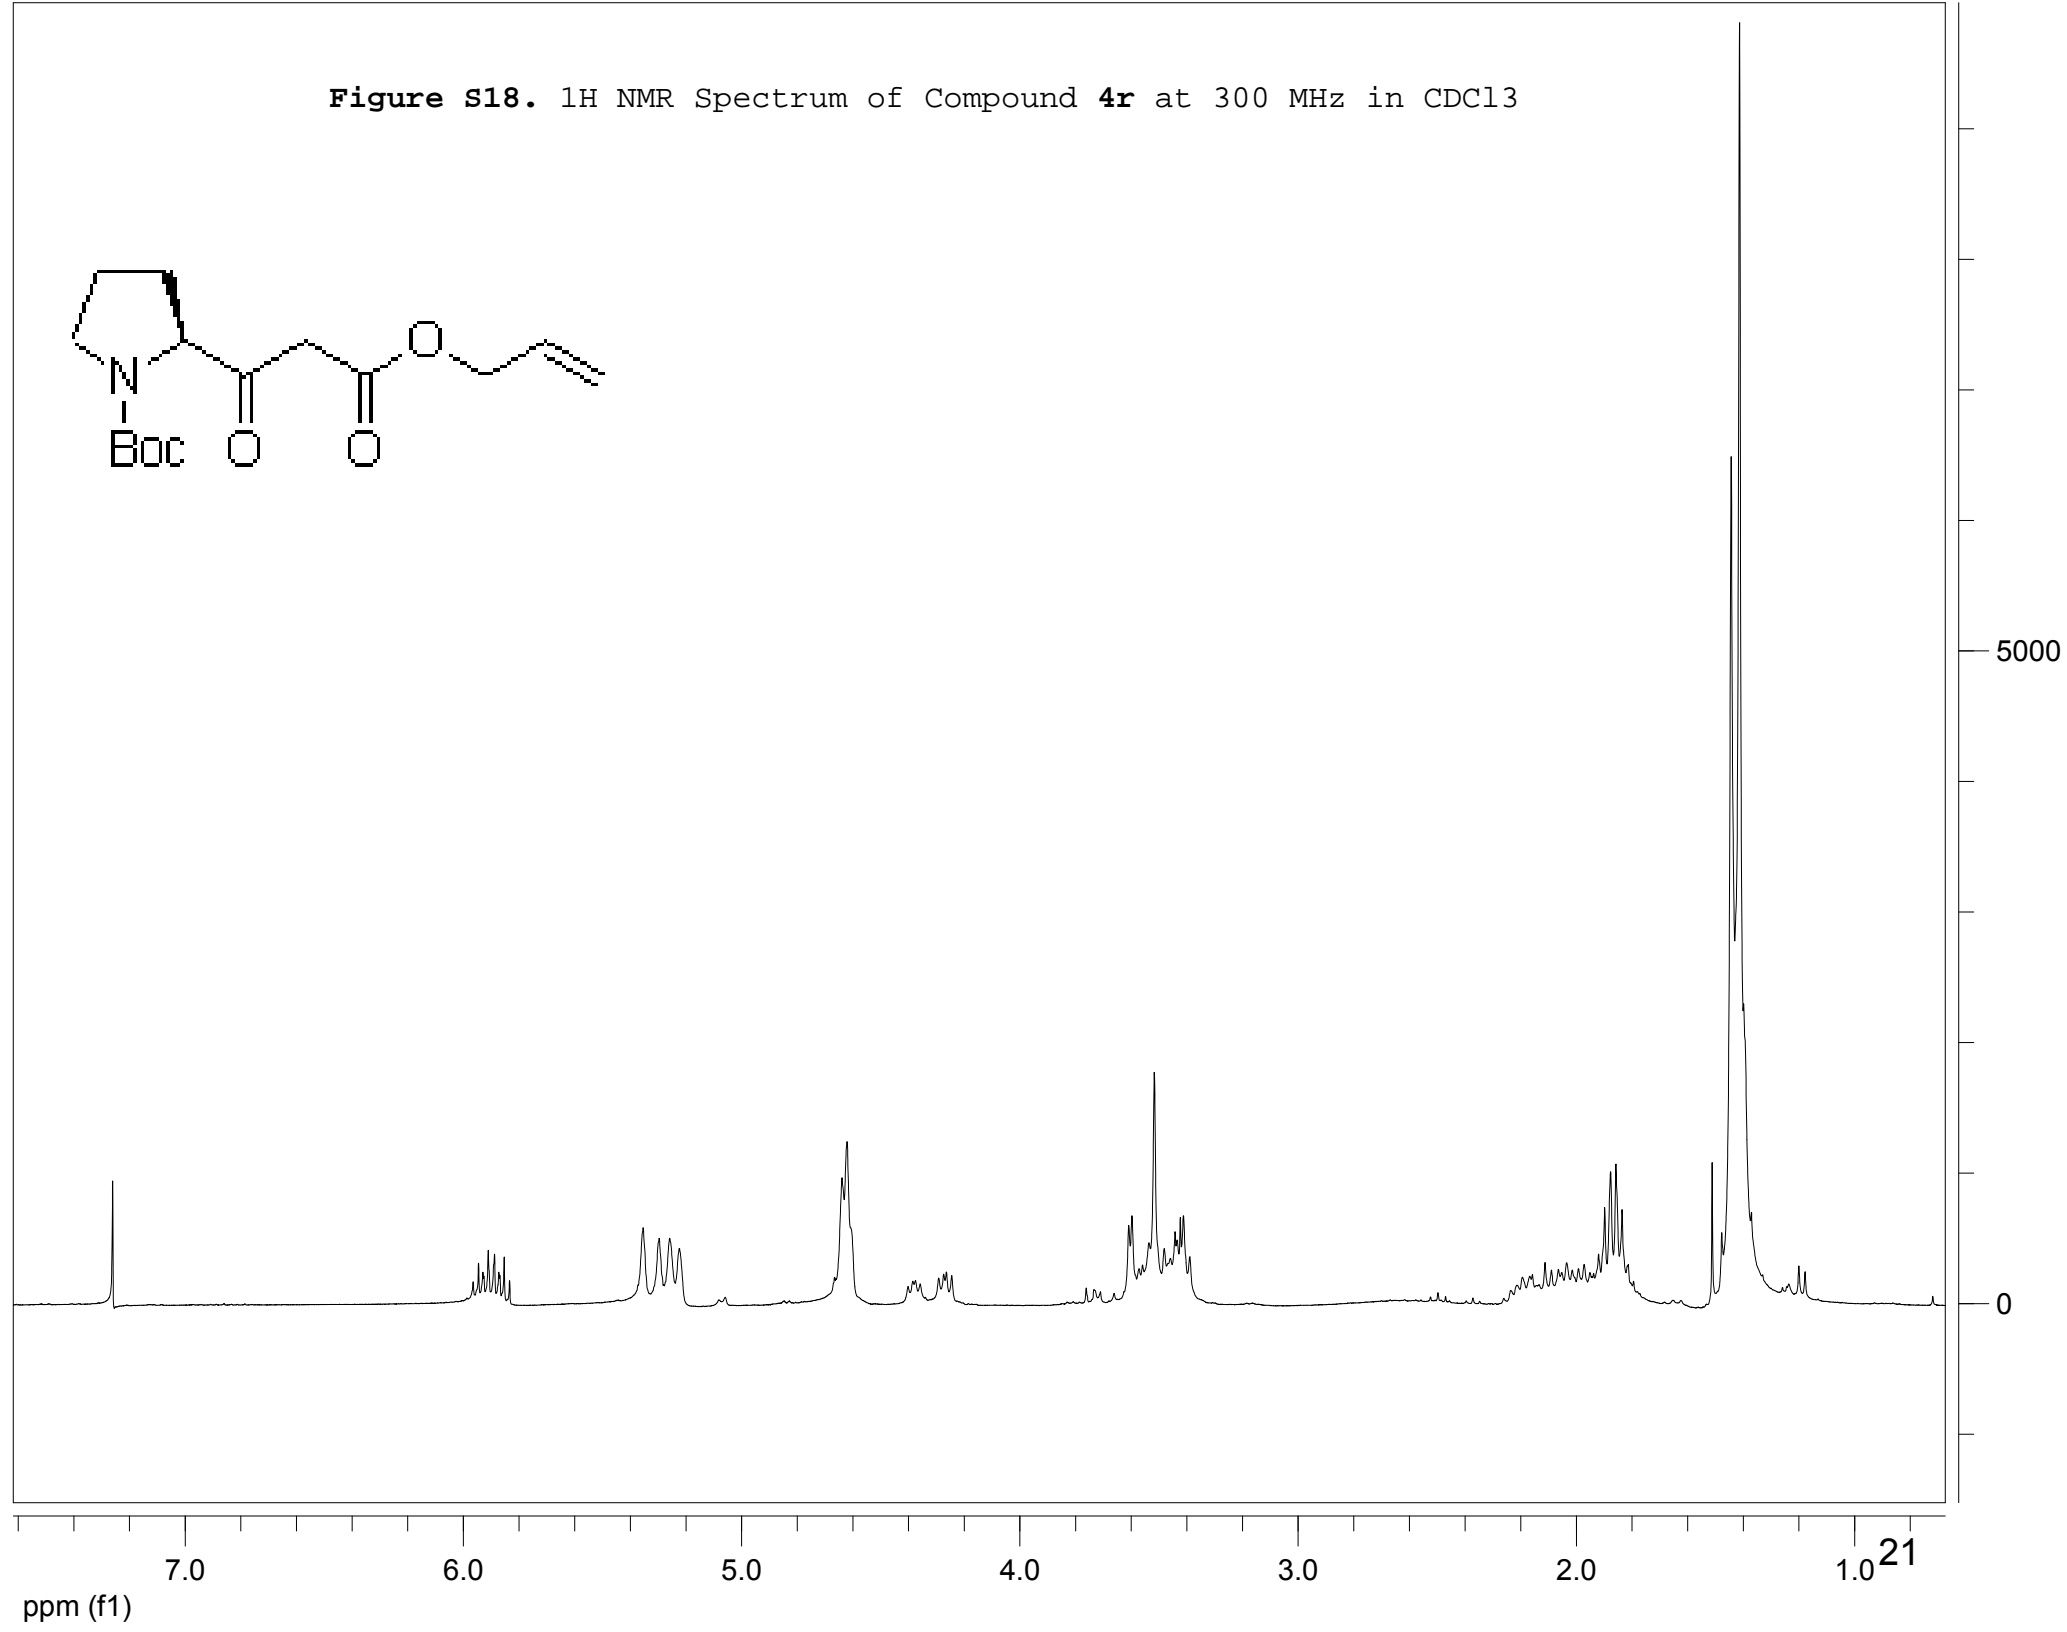

Figure S19. <sup>1</sup>H NMR Spectrum of Compound 6a at 300 MHz in CDCl<sub>3</sub>

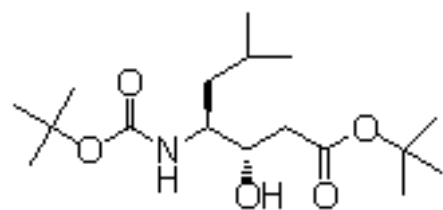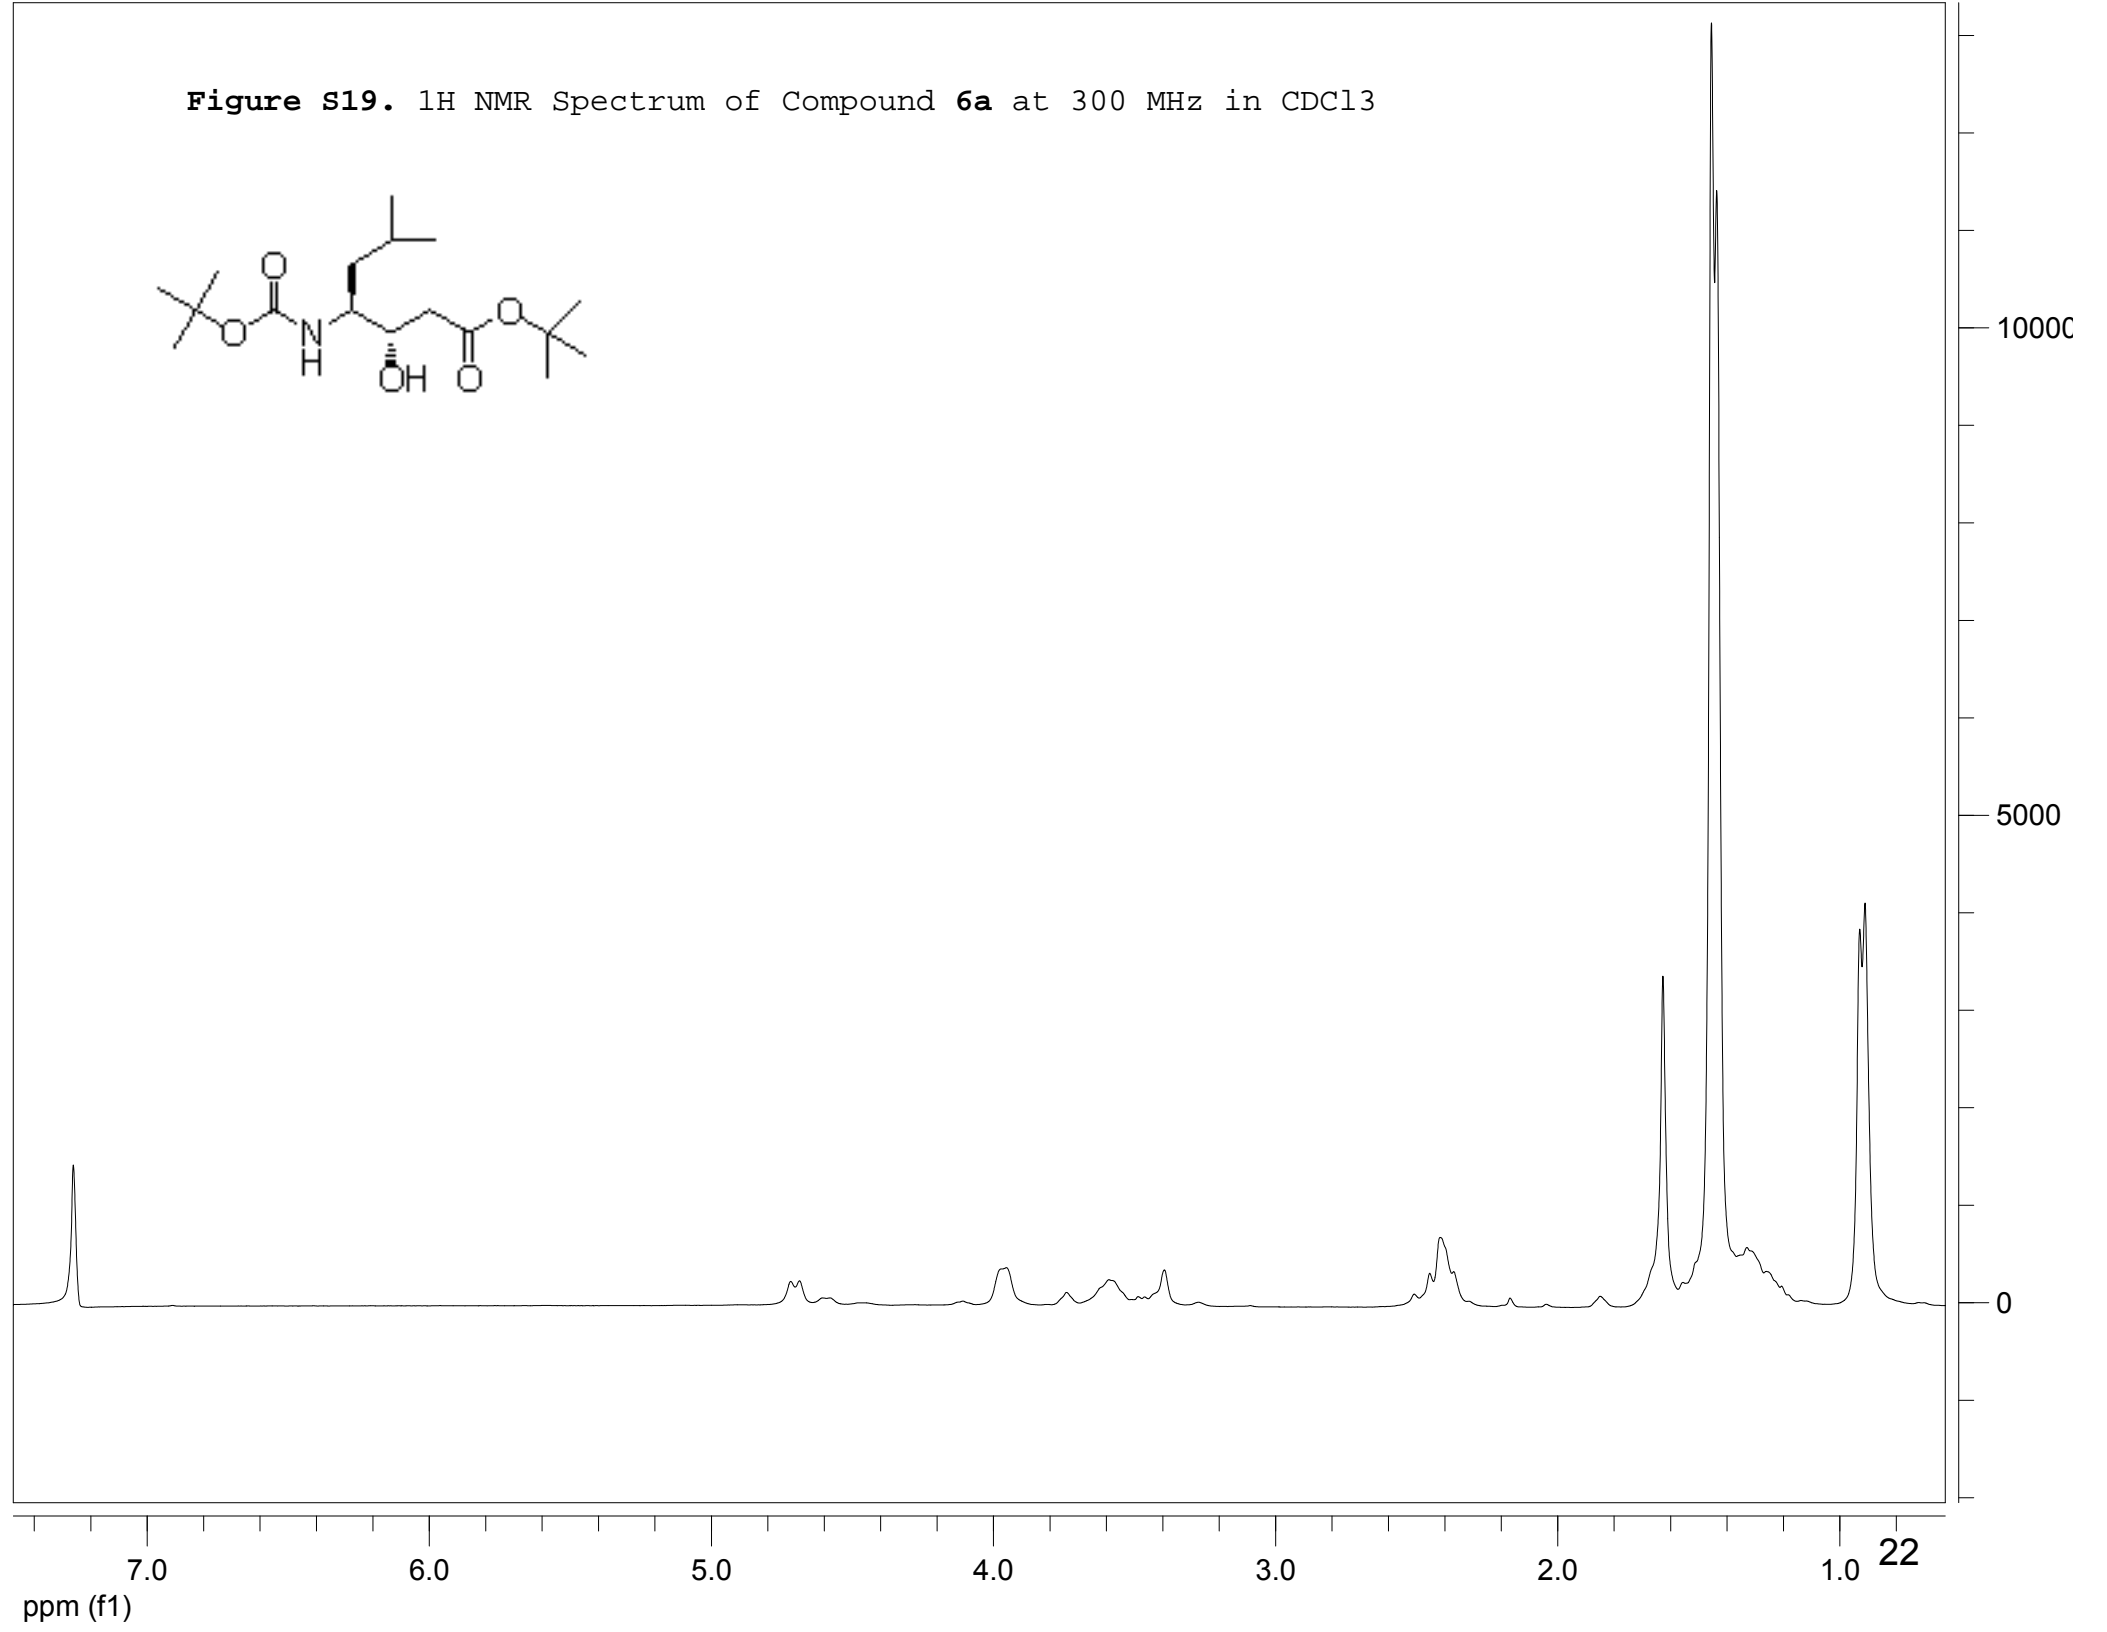

Figure S20. <sup>1</sup>H NMR Spectrum of Compound **6b** at 300 MHz in CDCl<sub>3</sub>

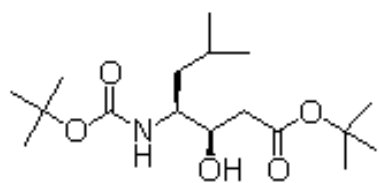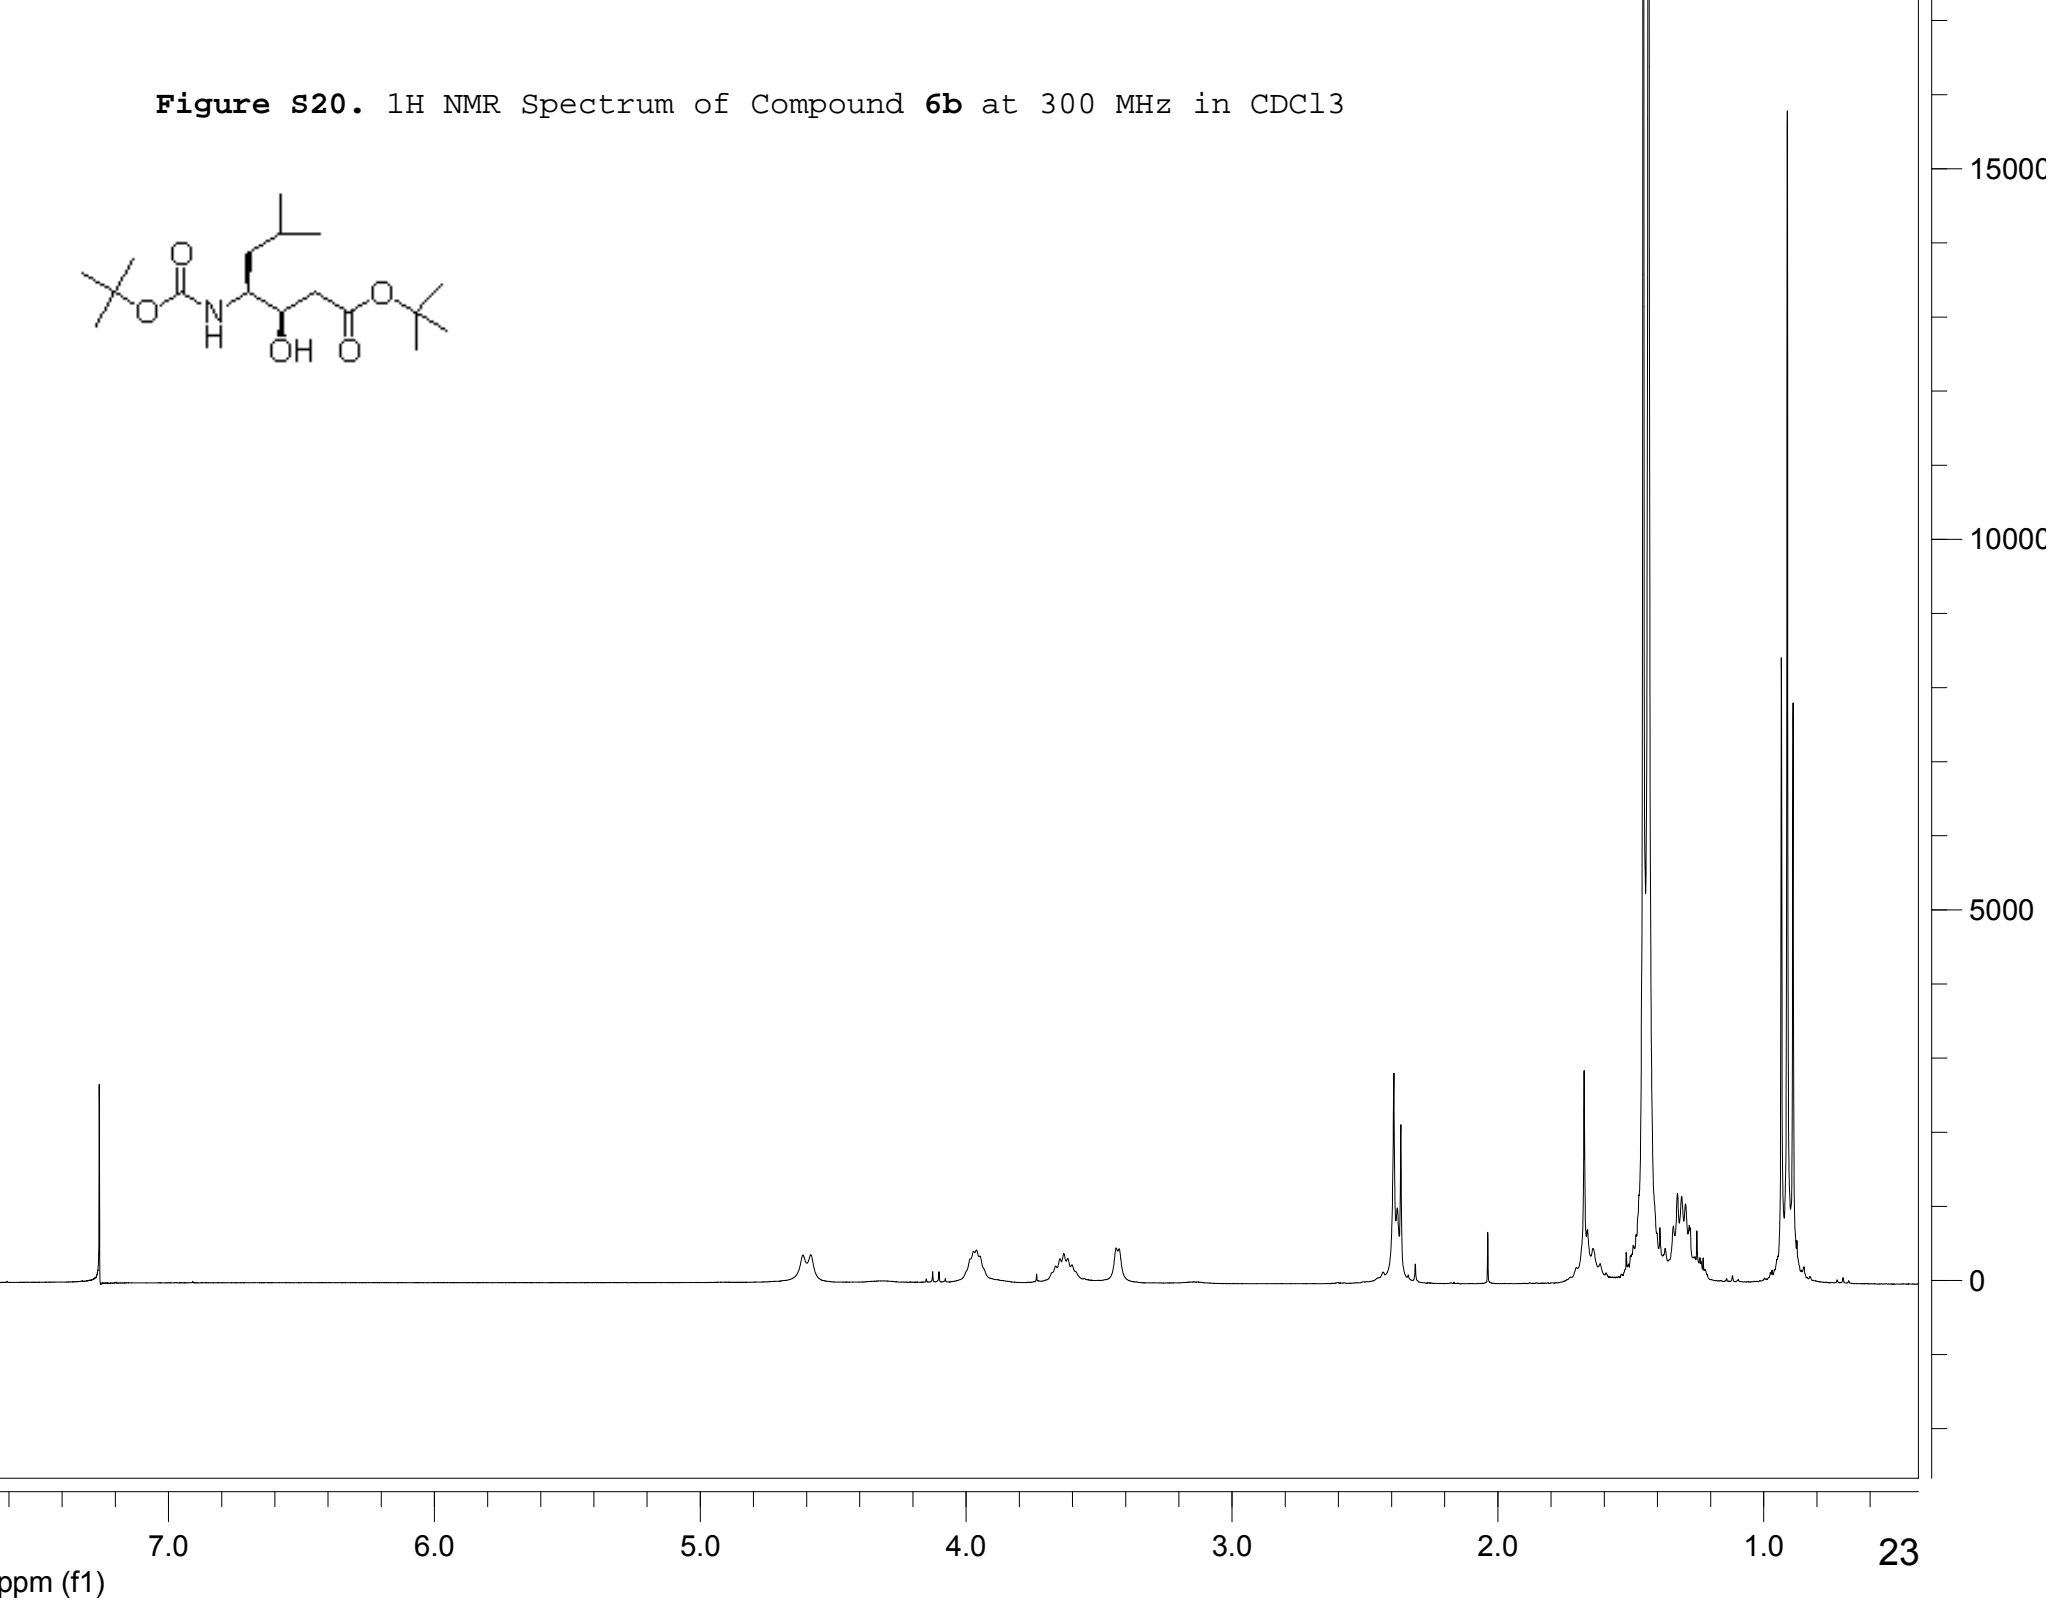

Figure S21. <sup>1</sup>H NMR Spectrum of Compound 7a at 300 MHz in CDCl<sub>3</sub>

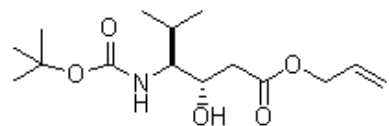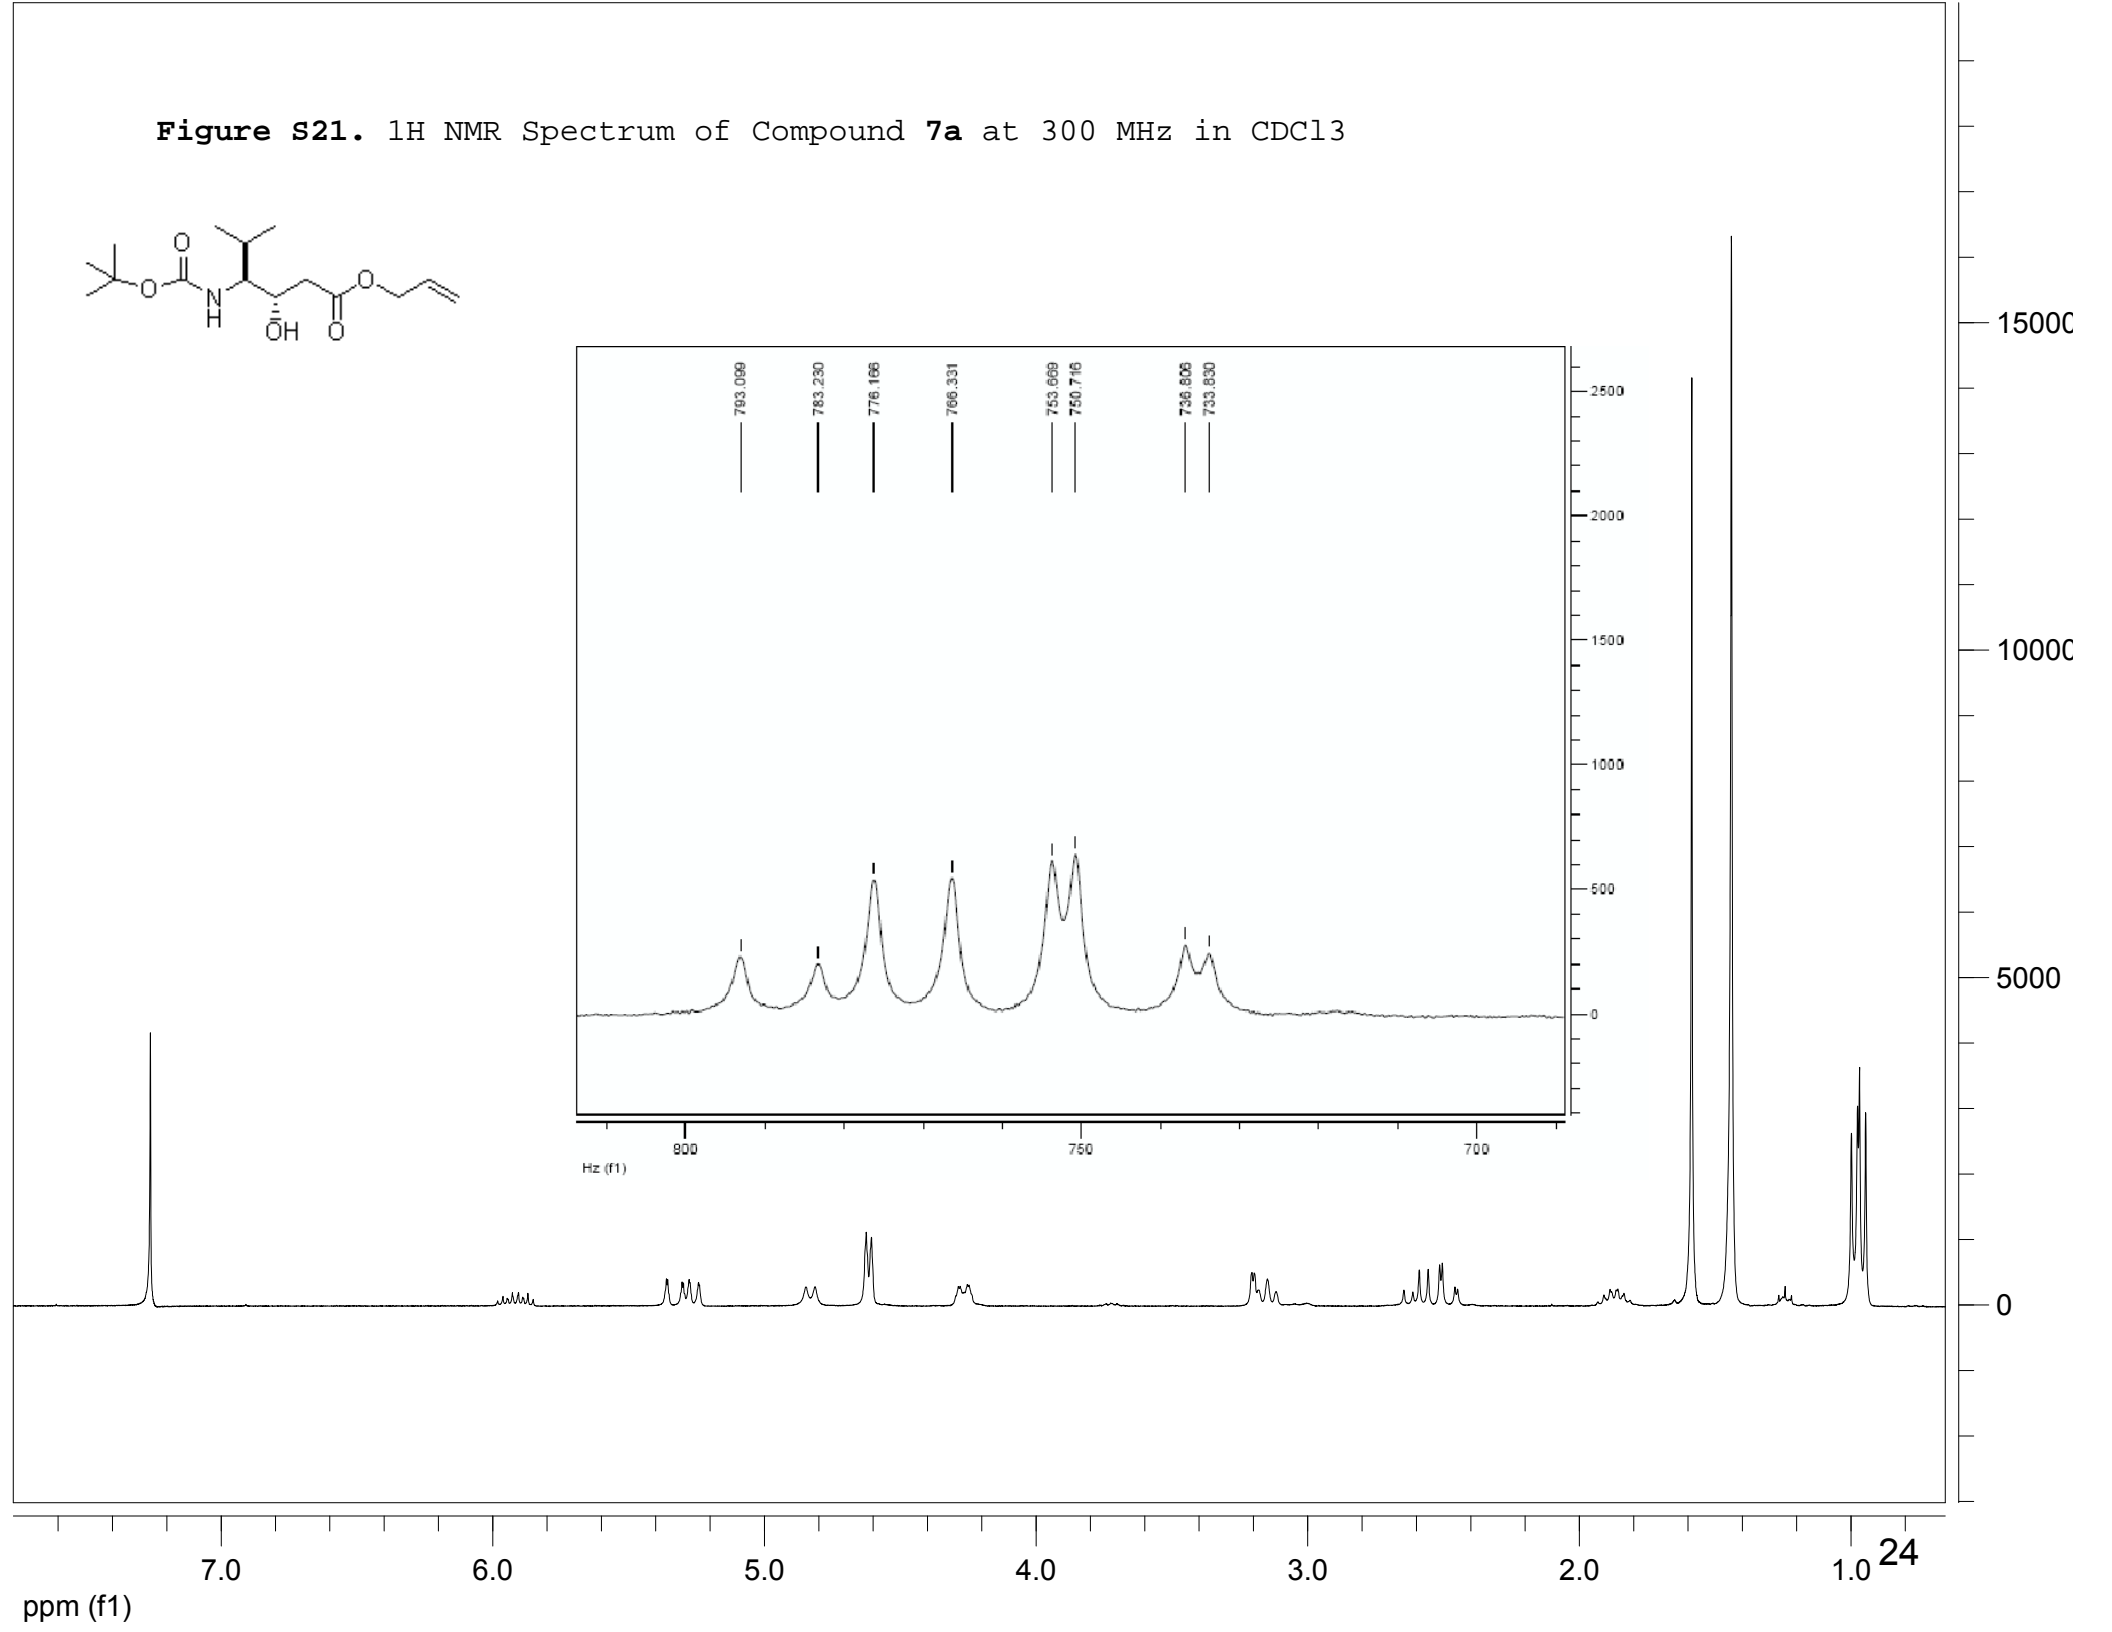



Figure S22. <sup>1</sup>H NMR Spectrum of Compound **7b** at 300 MHz in CDCl<sub>3</sub>

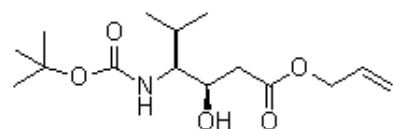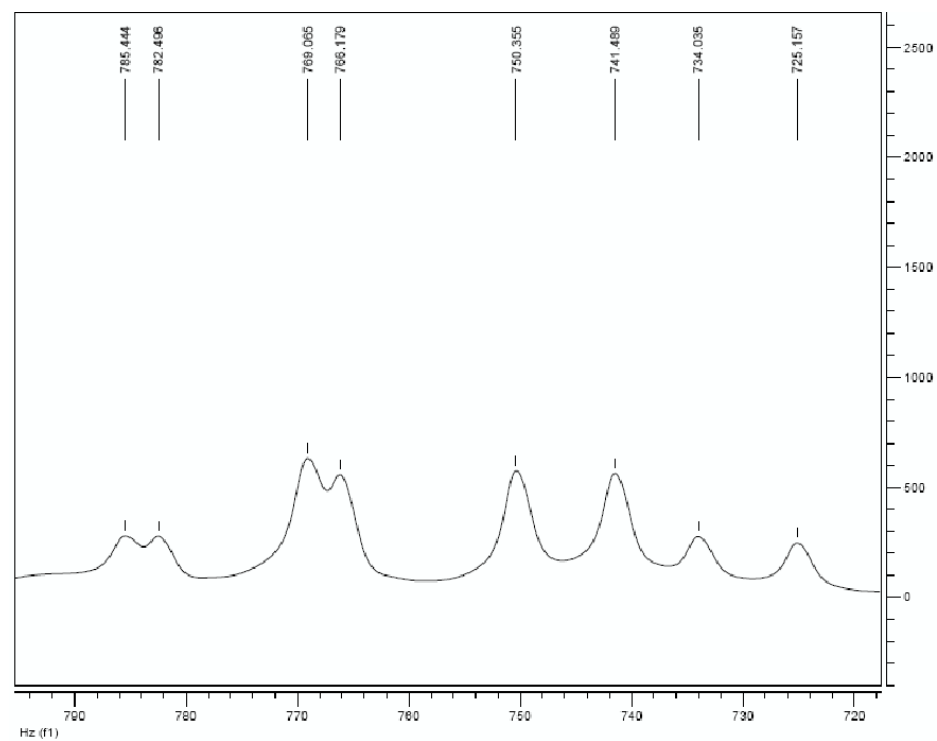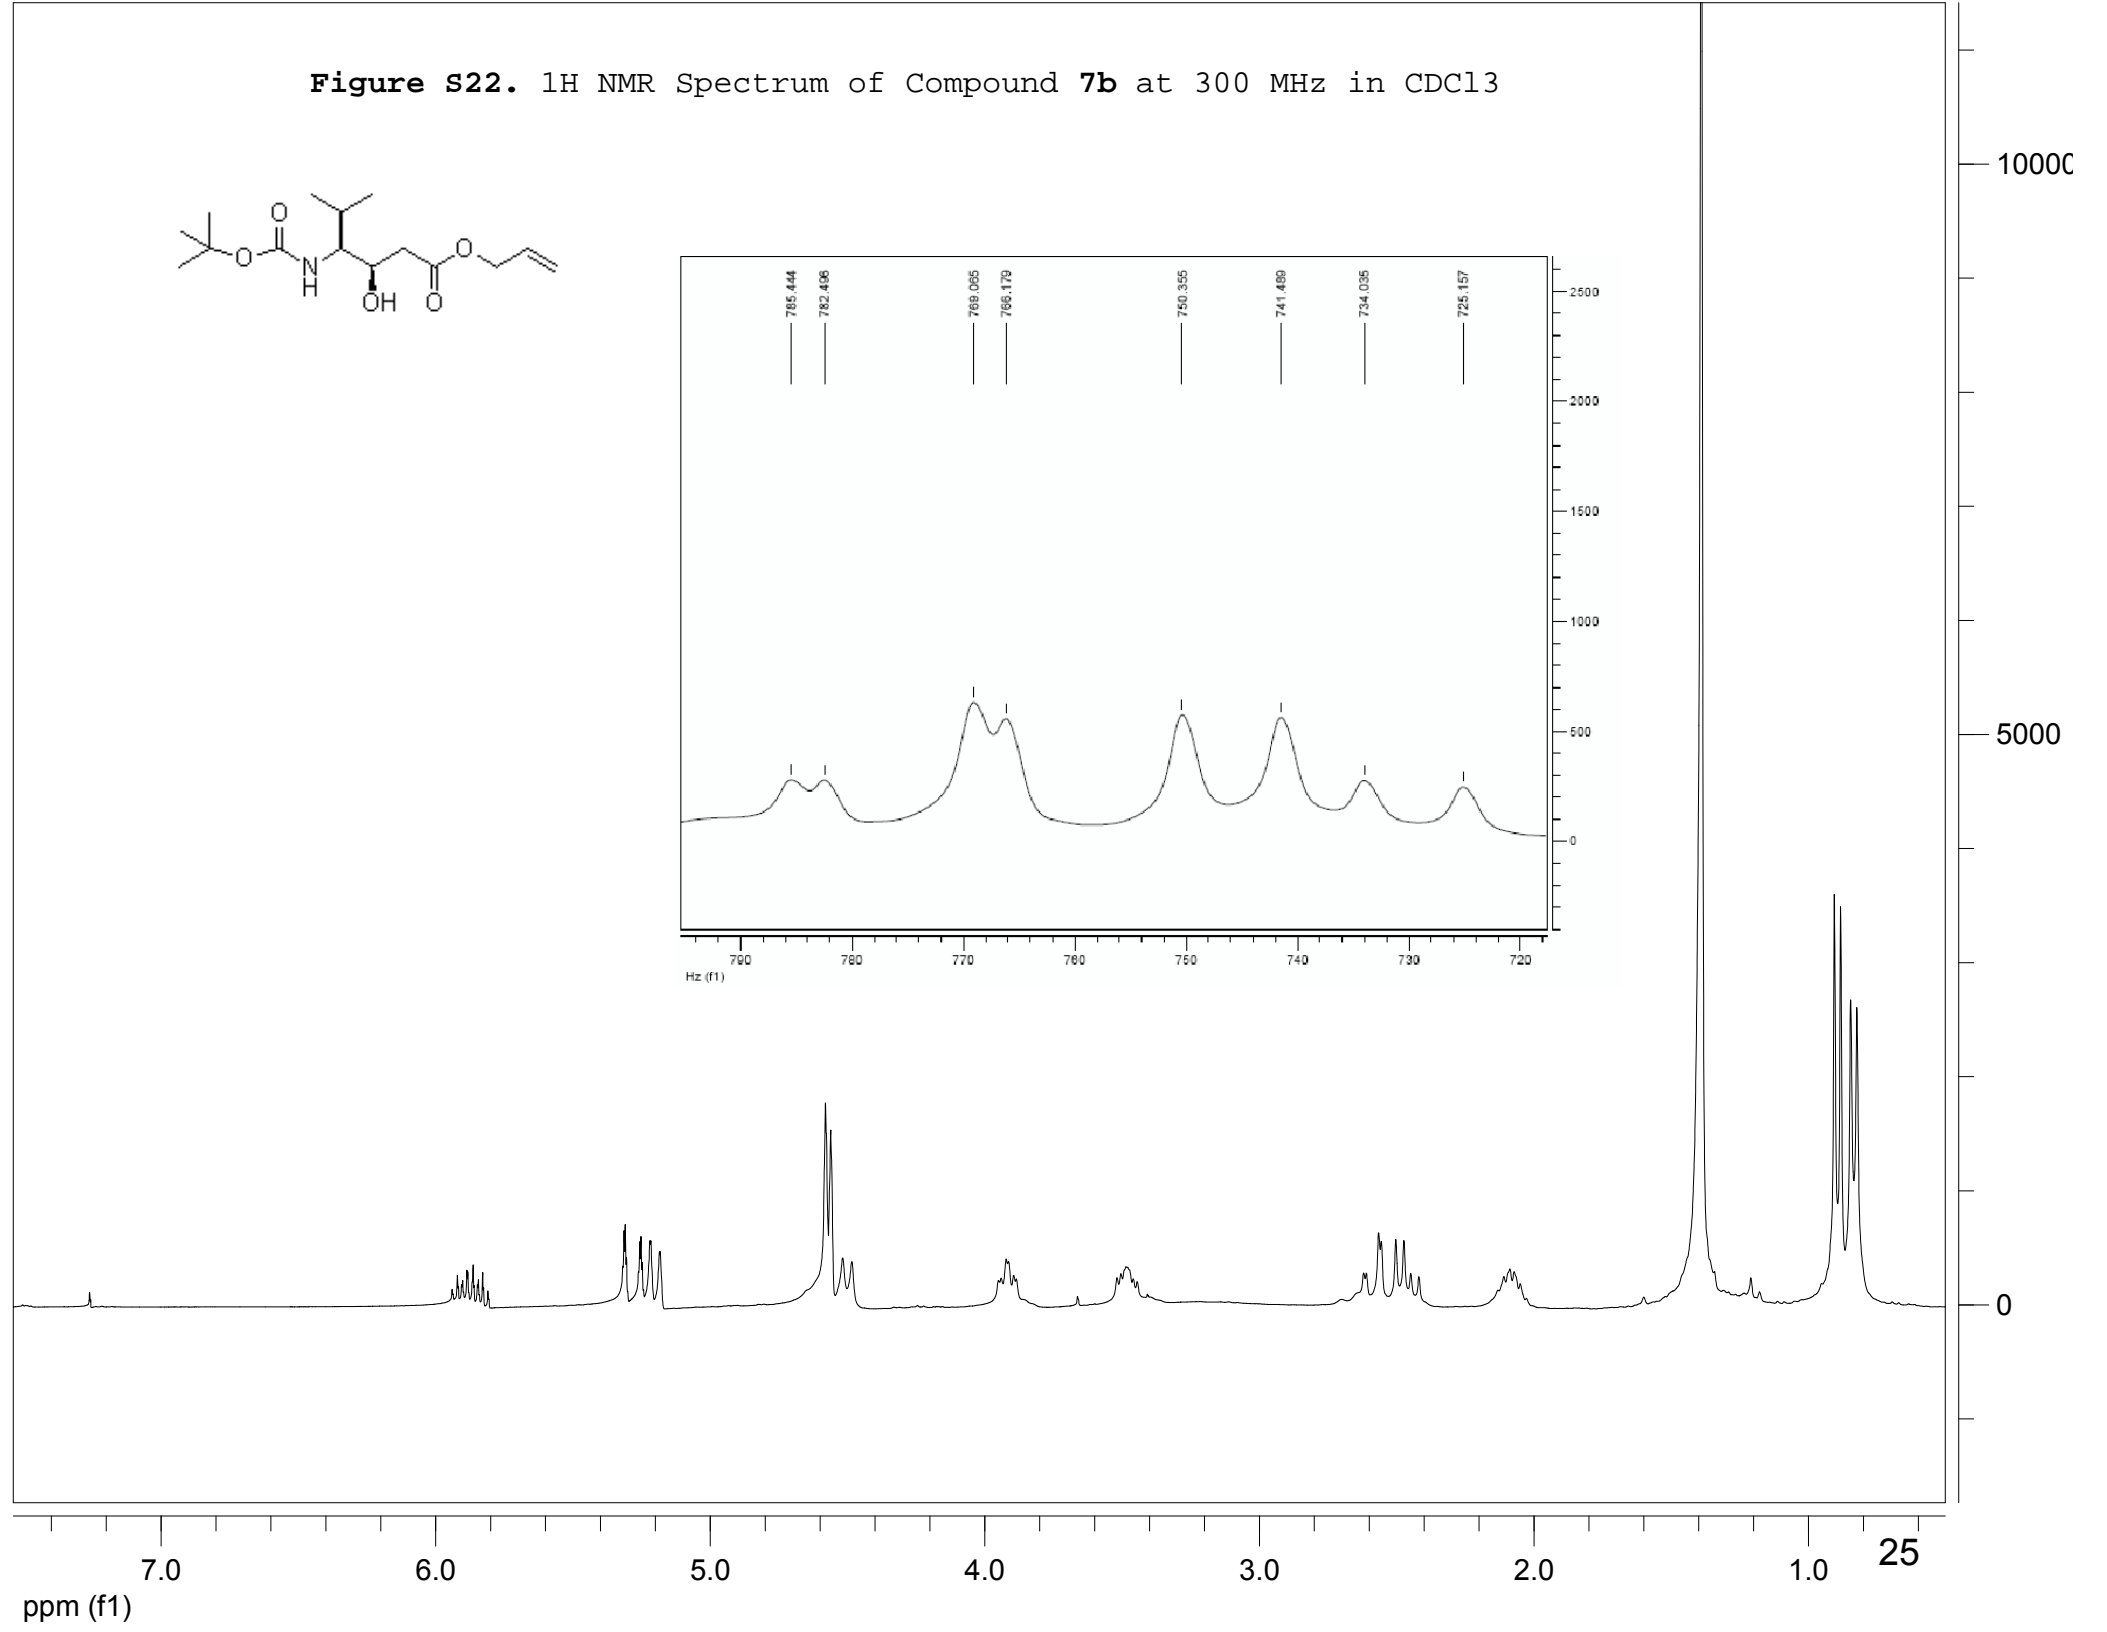

Figure S23. <sup>1</sup>H NMR Spectrum of Compound **8a** at 300 MHz in CDCl<sub>3</sub>

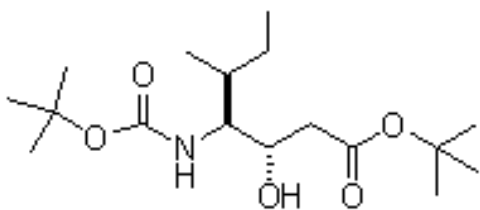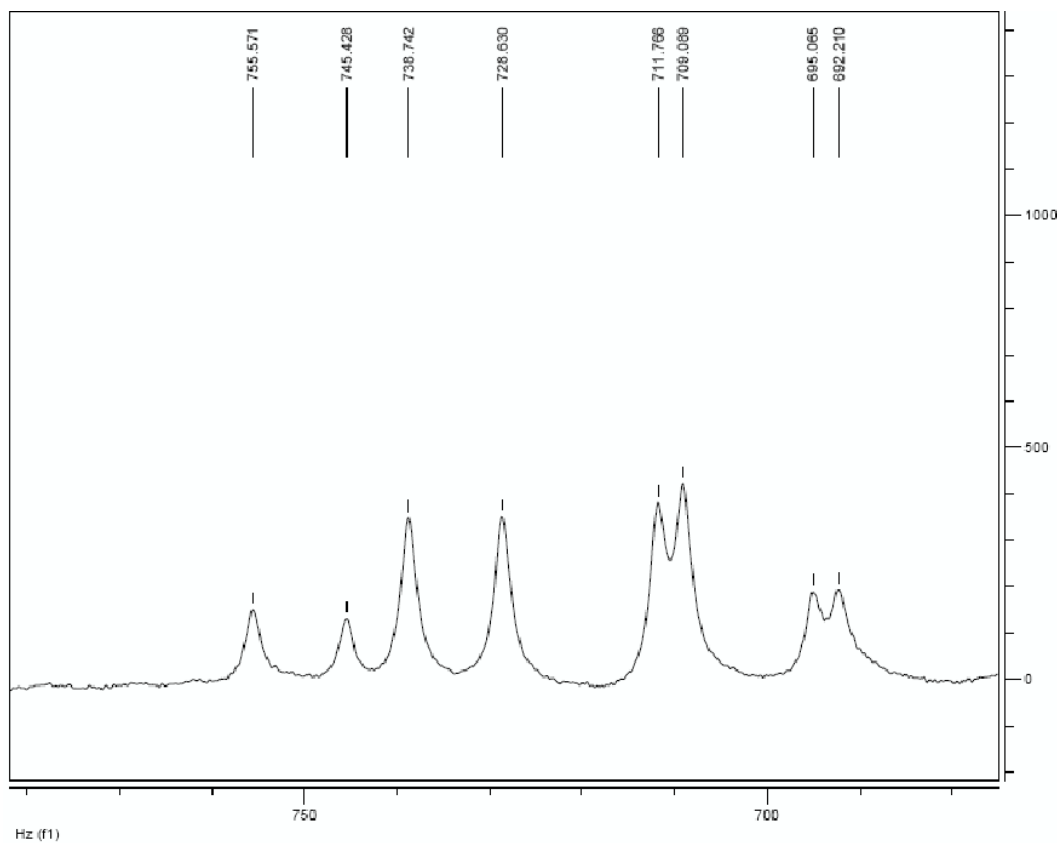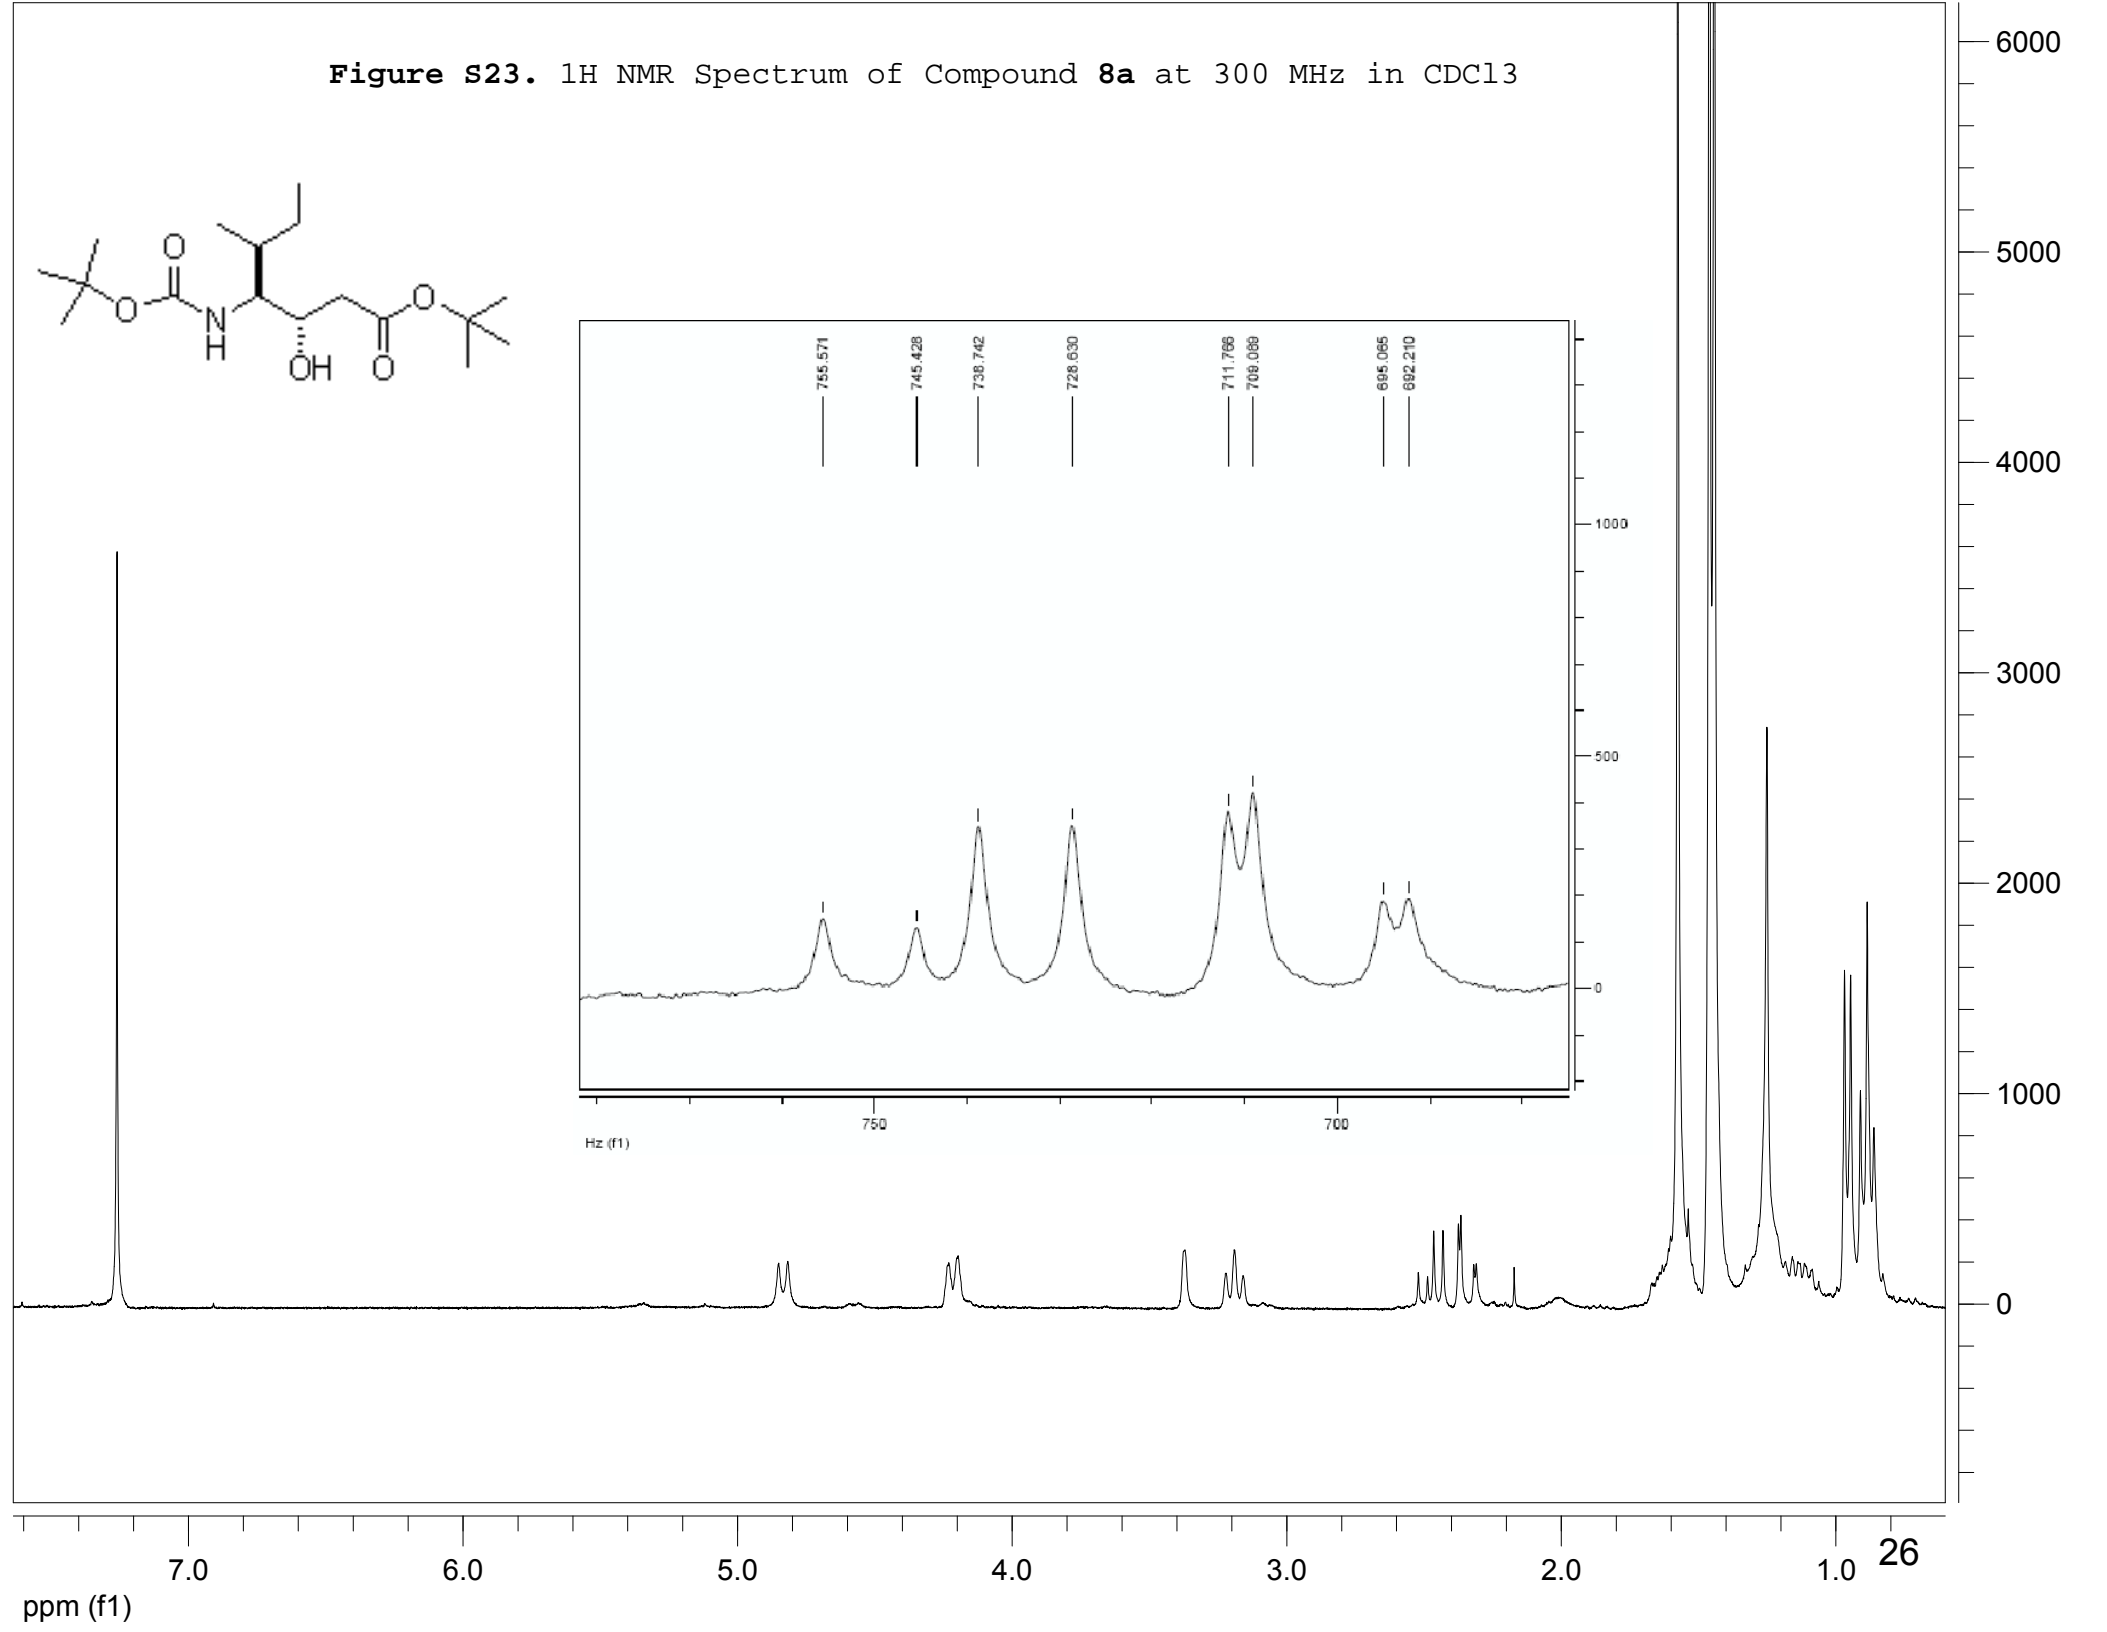

Figure S24. <sup>1</sup>H NMR Spectrum of Compound 8b at 300 MHz in CDCl<sub>3</sub>

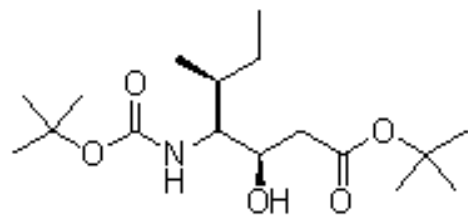

compound 8b

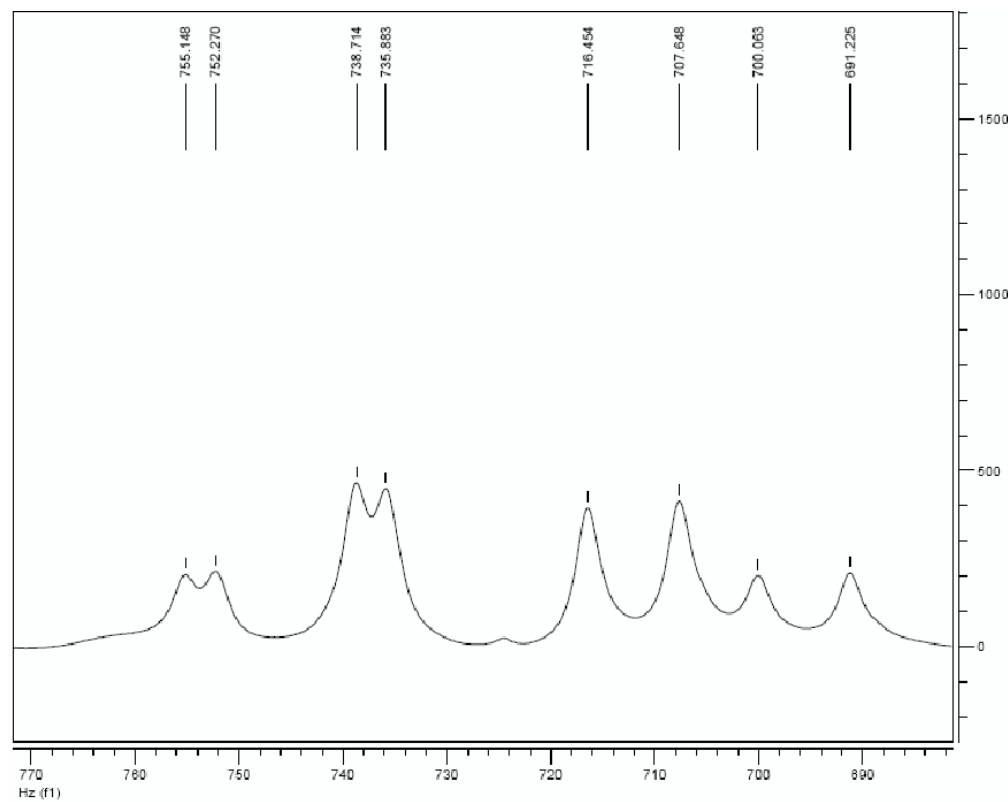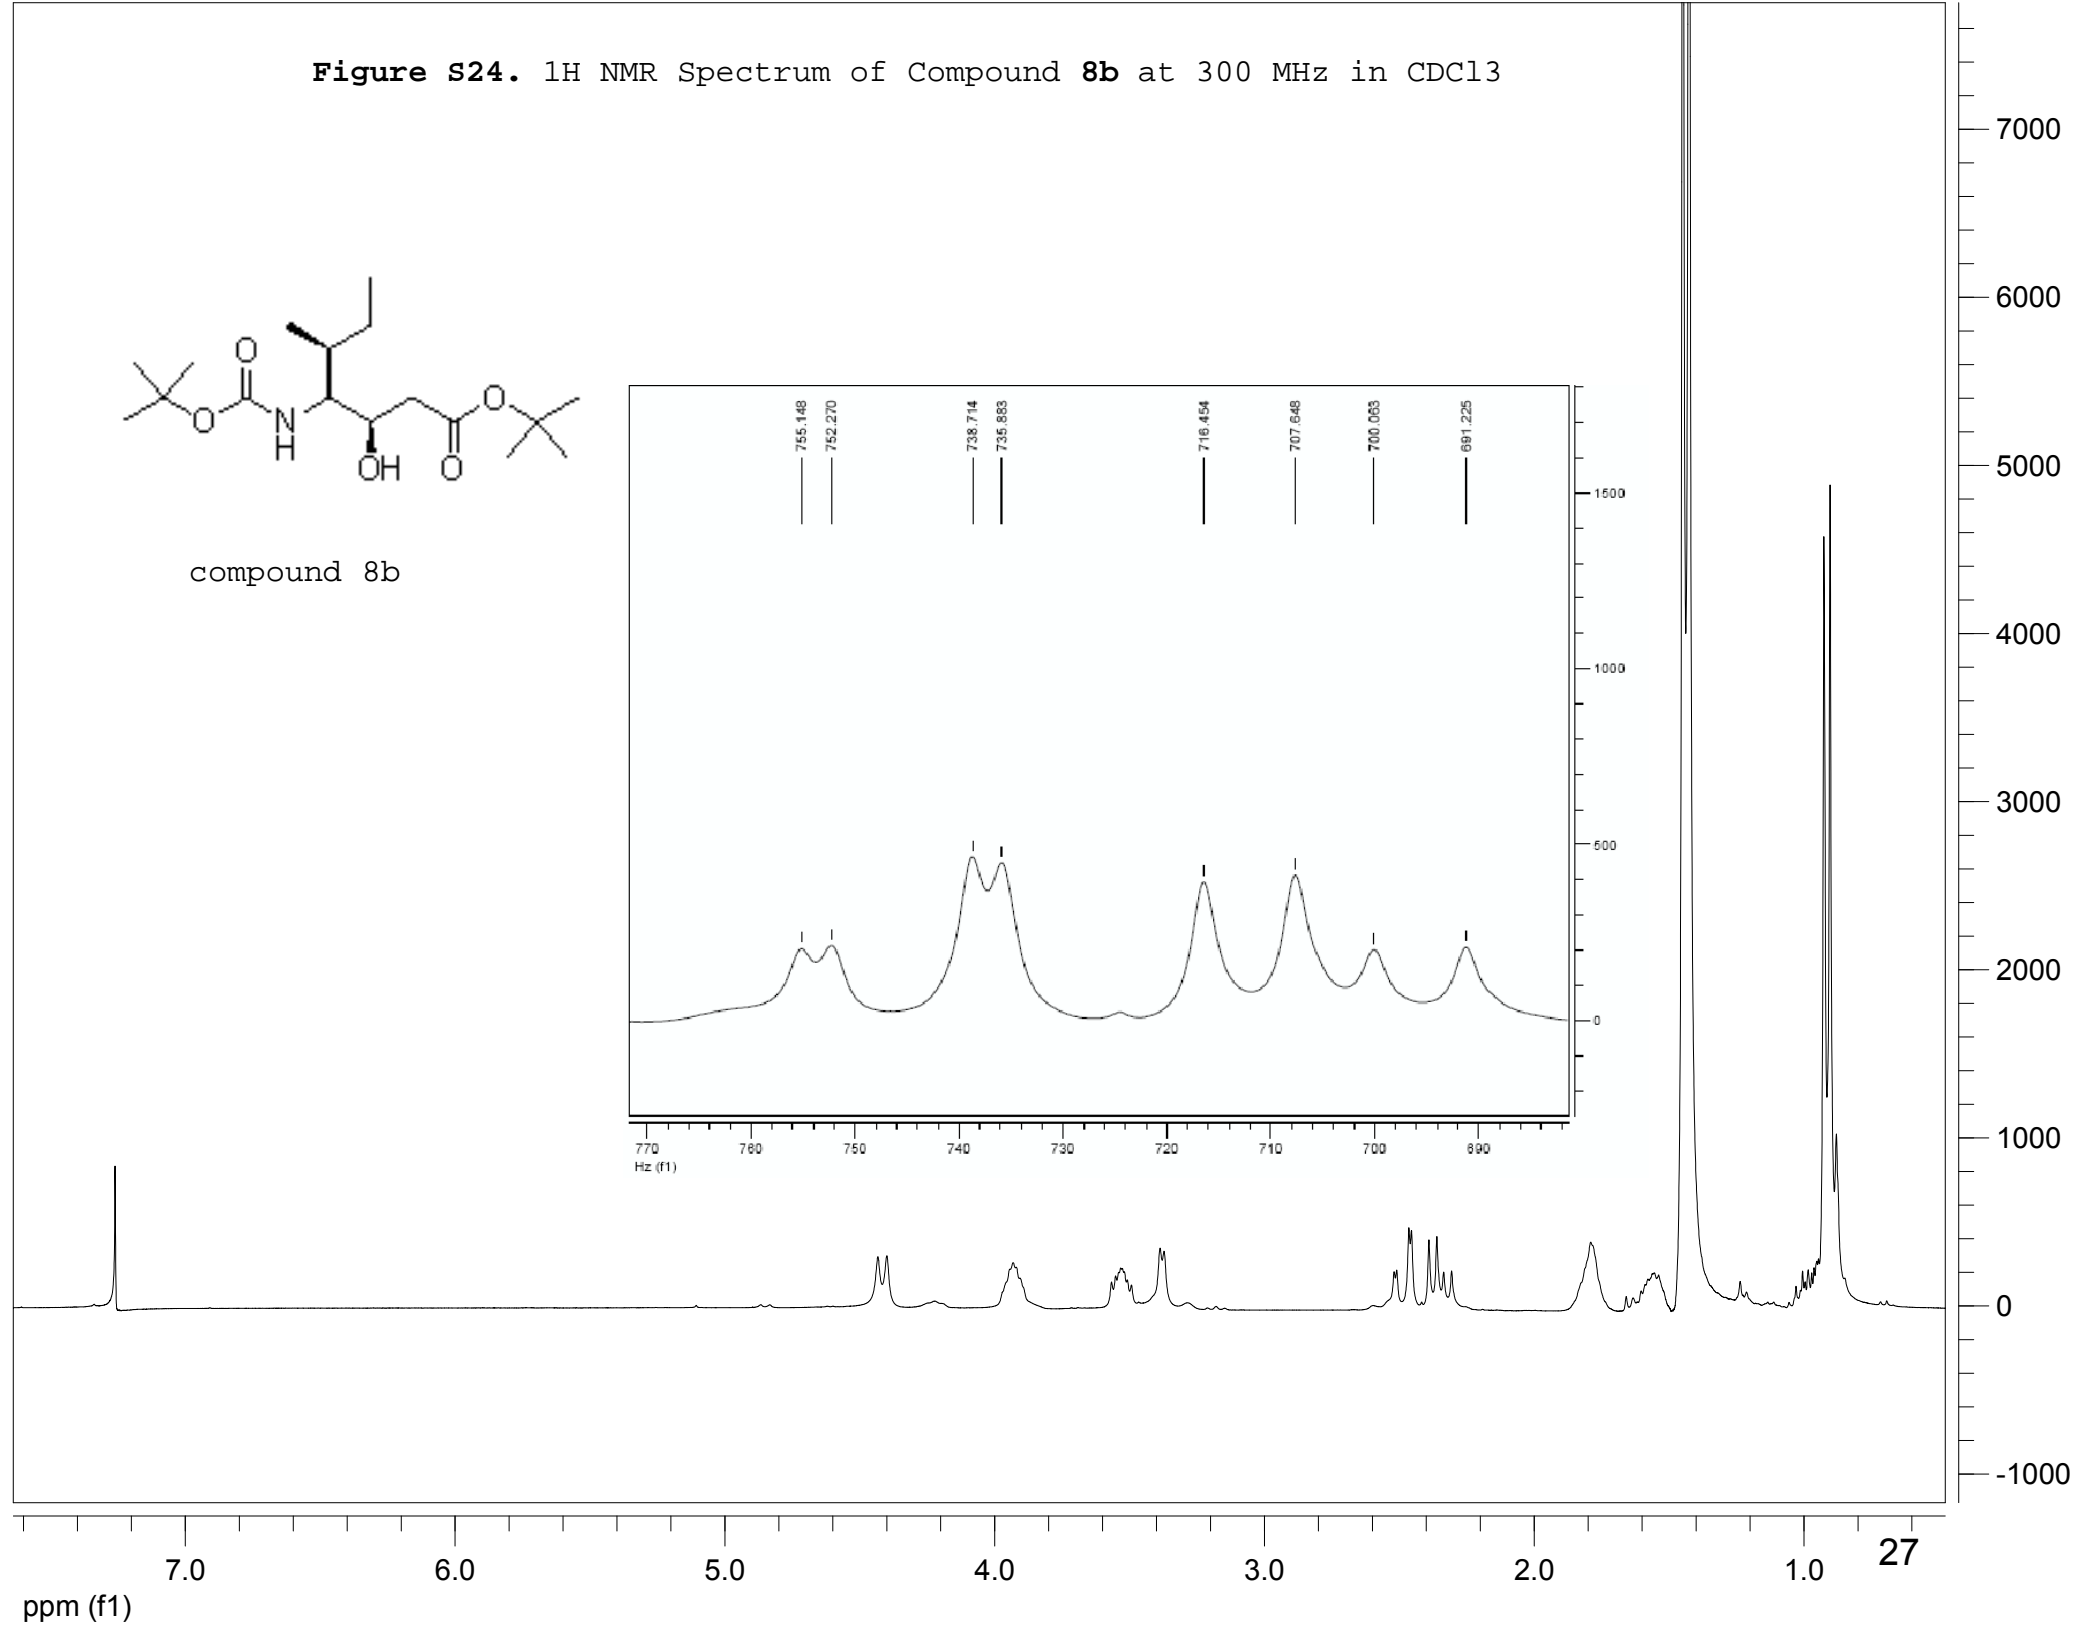

Figure S25. <sup>1</sup>H NMR Spectrum of Compound 10a at 300 MHz in CDCl<sub>3</sub>

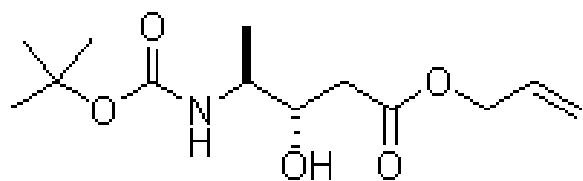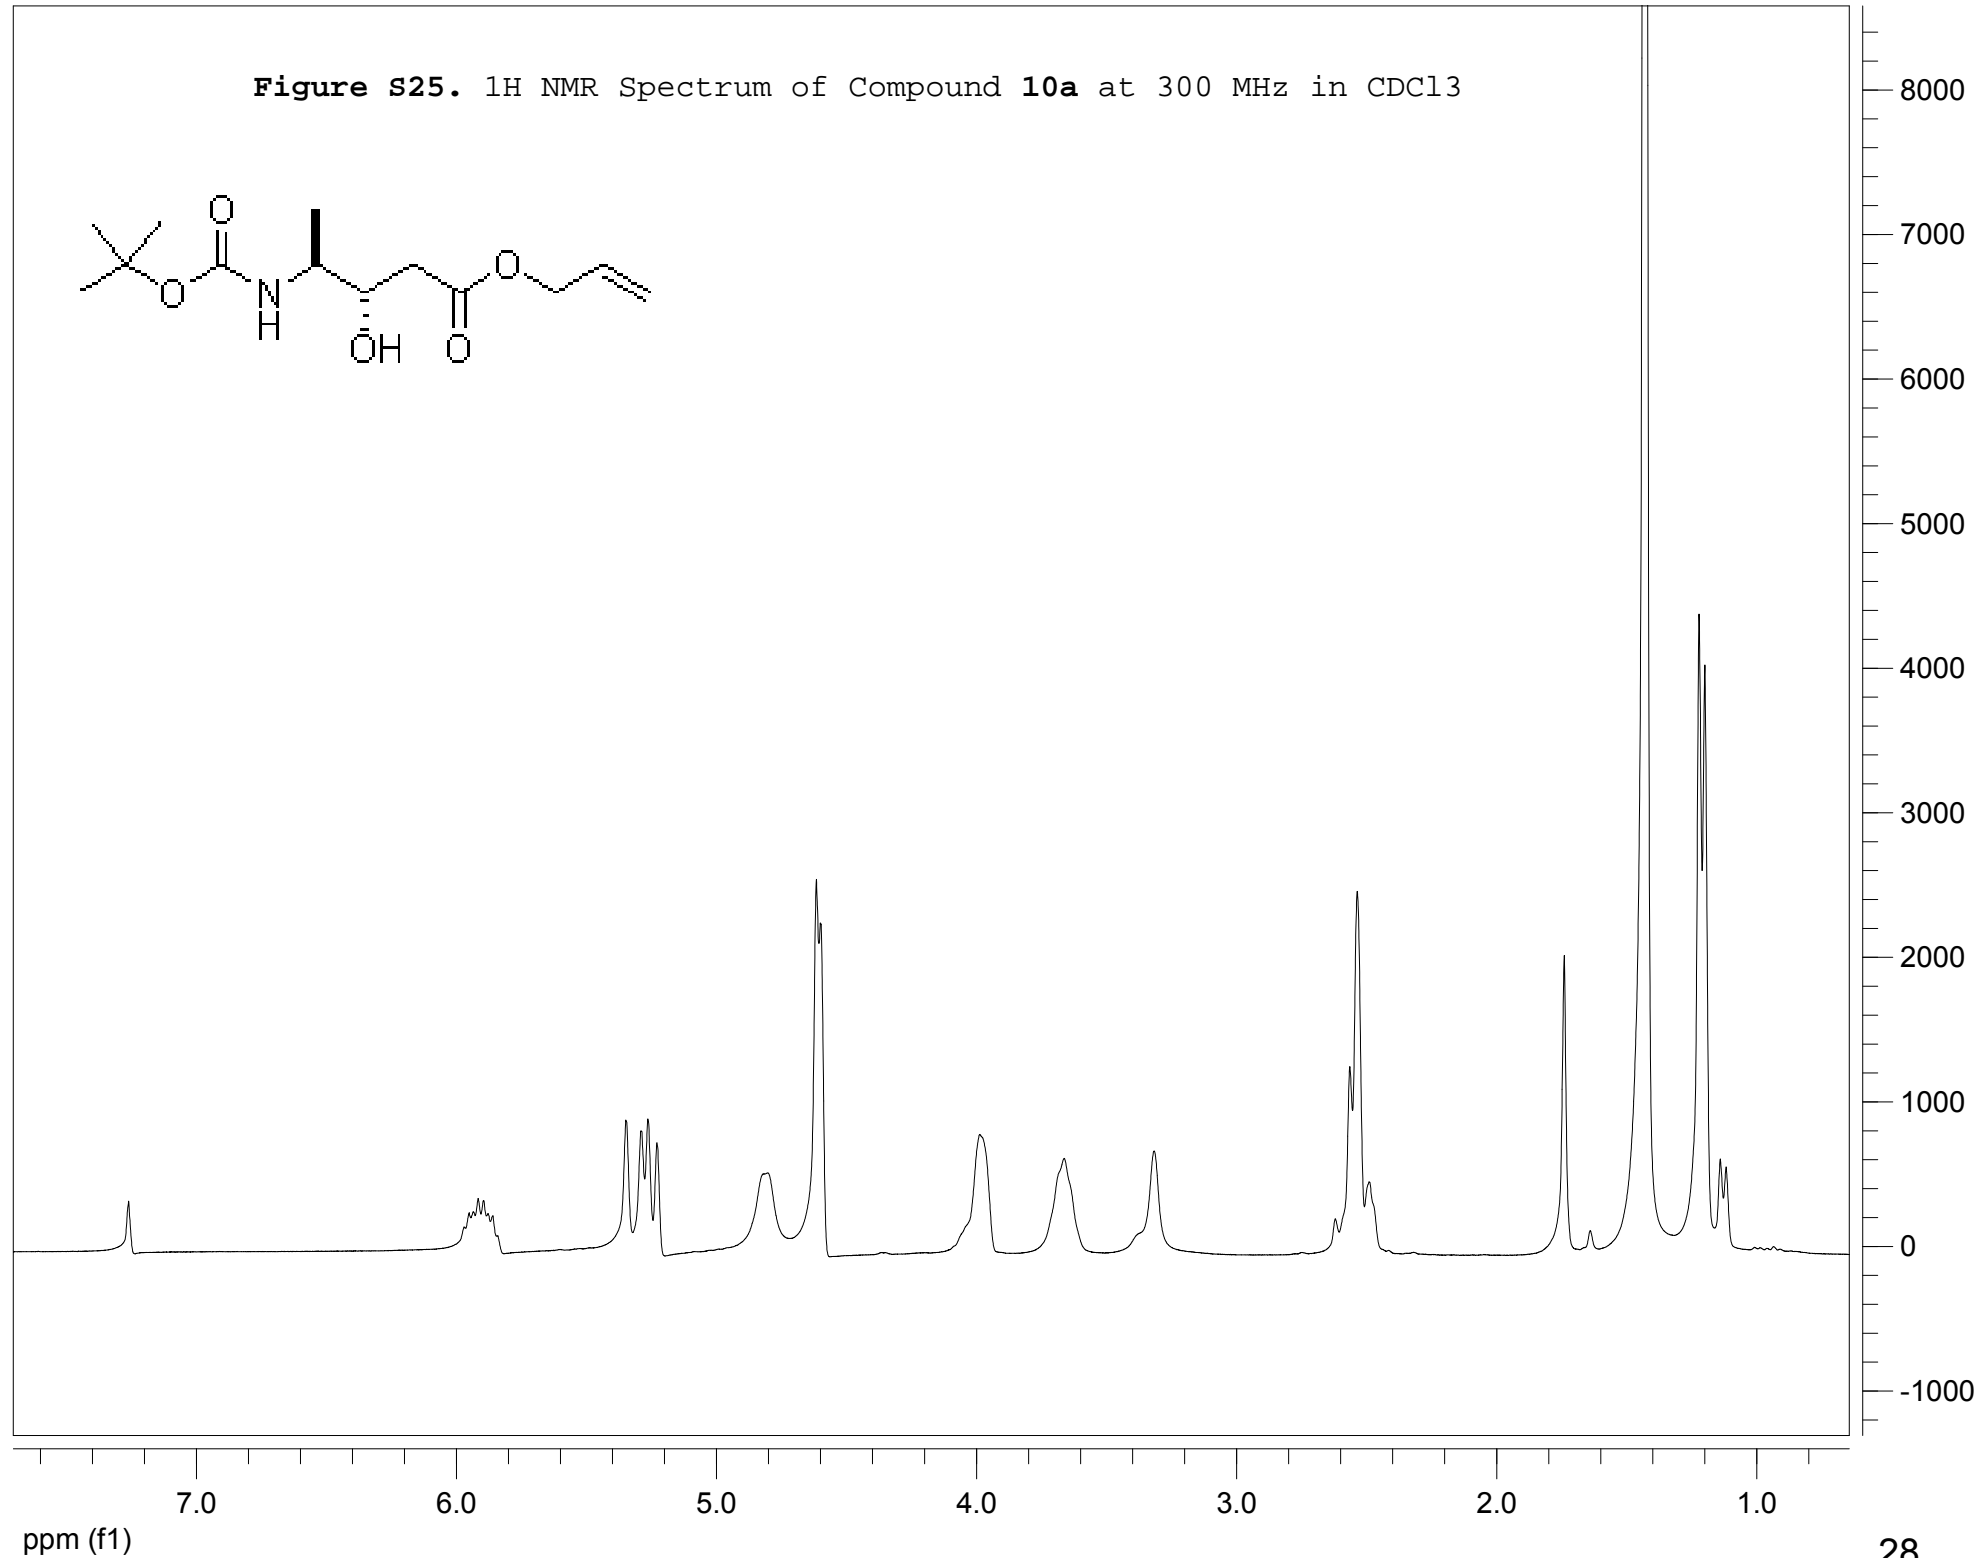

Figure S26. <sup>1</sup>H NMR Spectrum of Compound 10a at 300 MHz in DMSO-d<sub>6</sub>

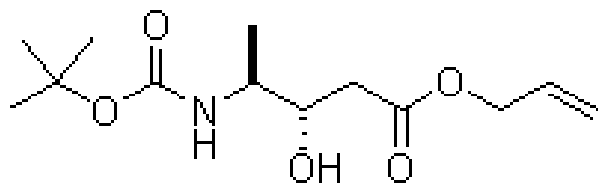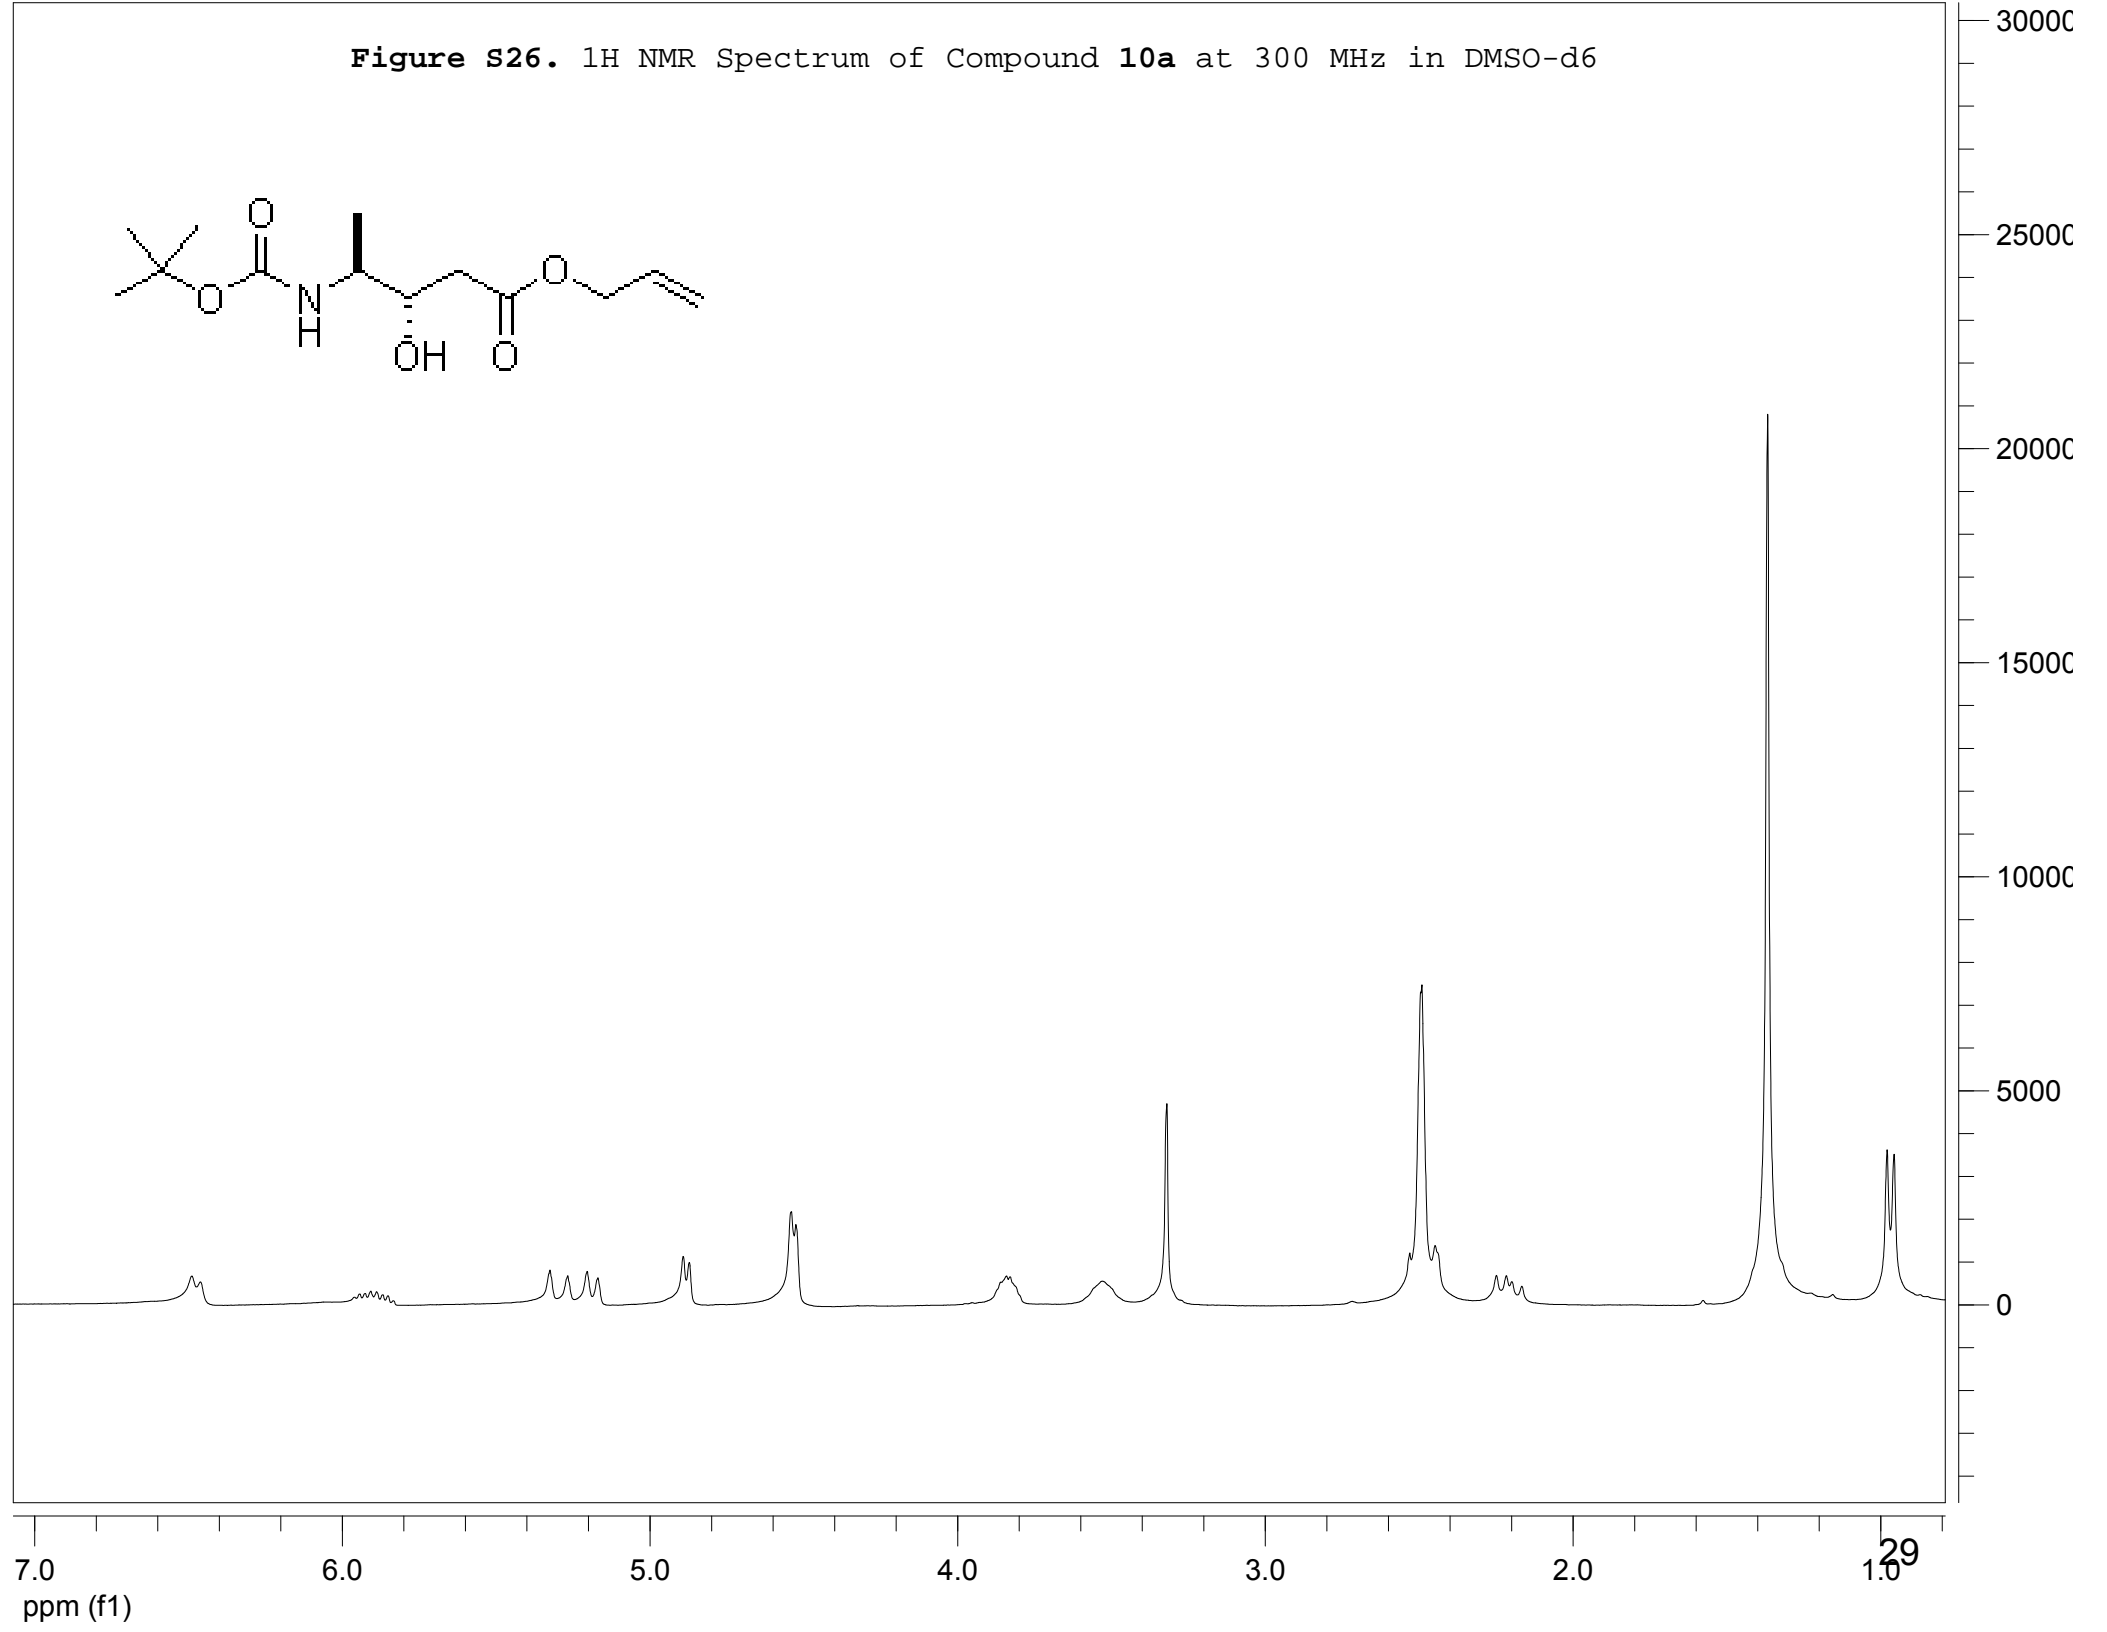

Figure S27. <sup>1</sup>H NMR Spectrum of Compound **10b** at 300 MHz in CDCl<sub>3</sub>

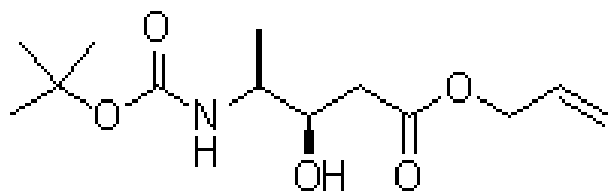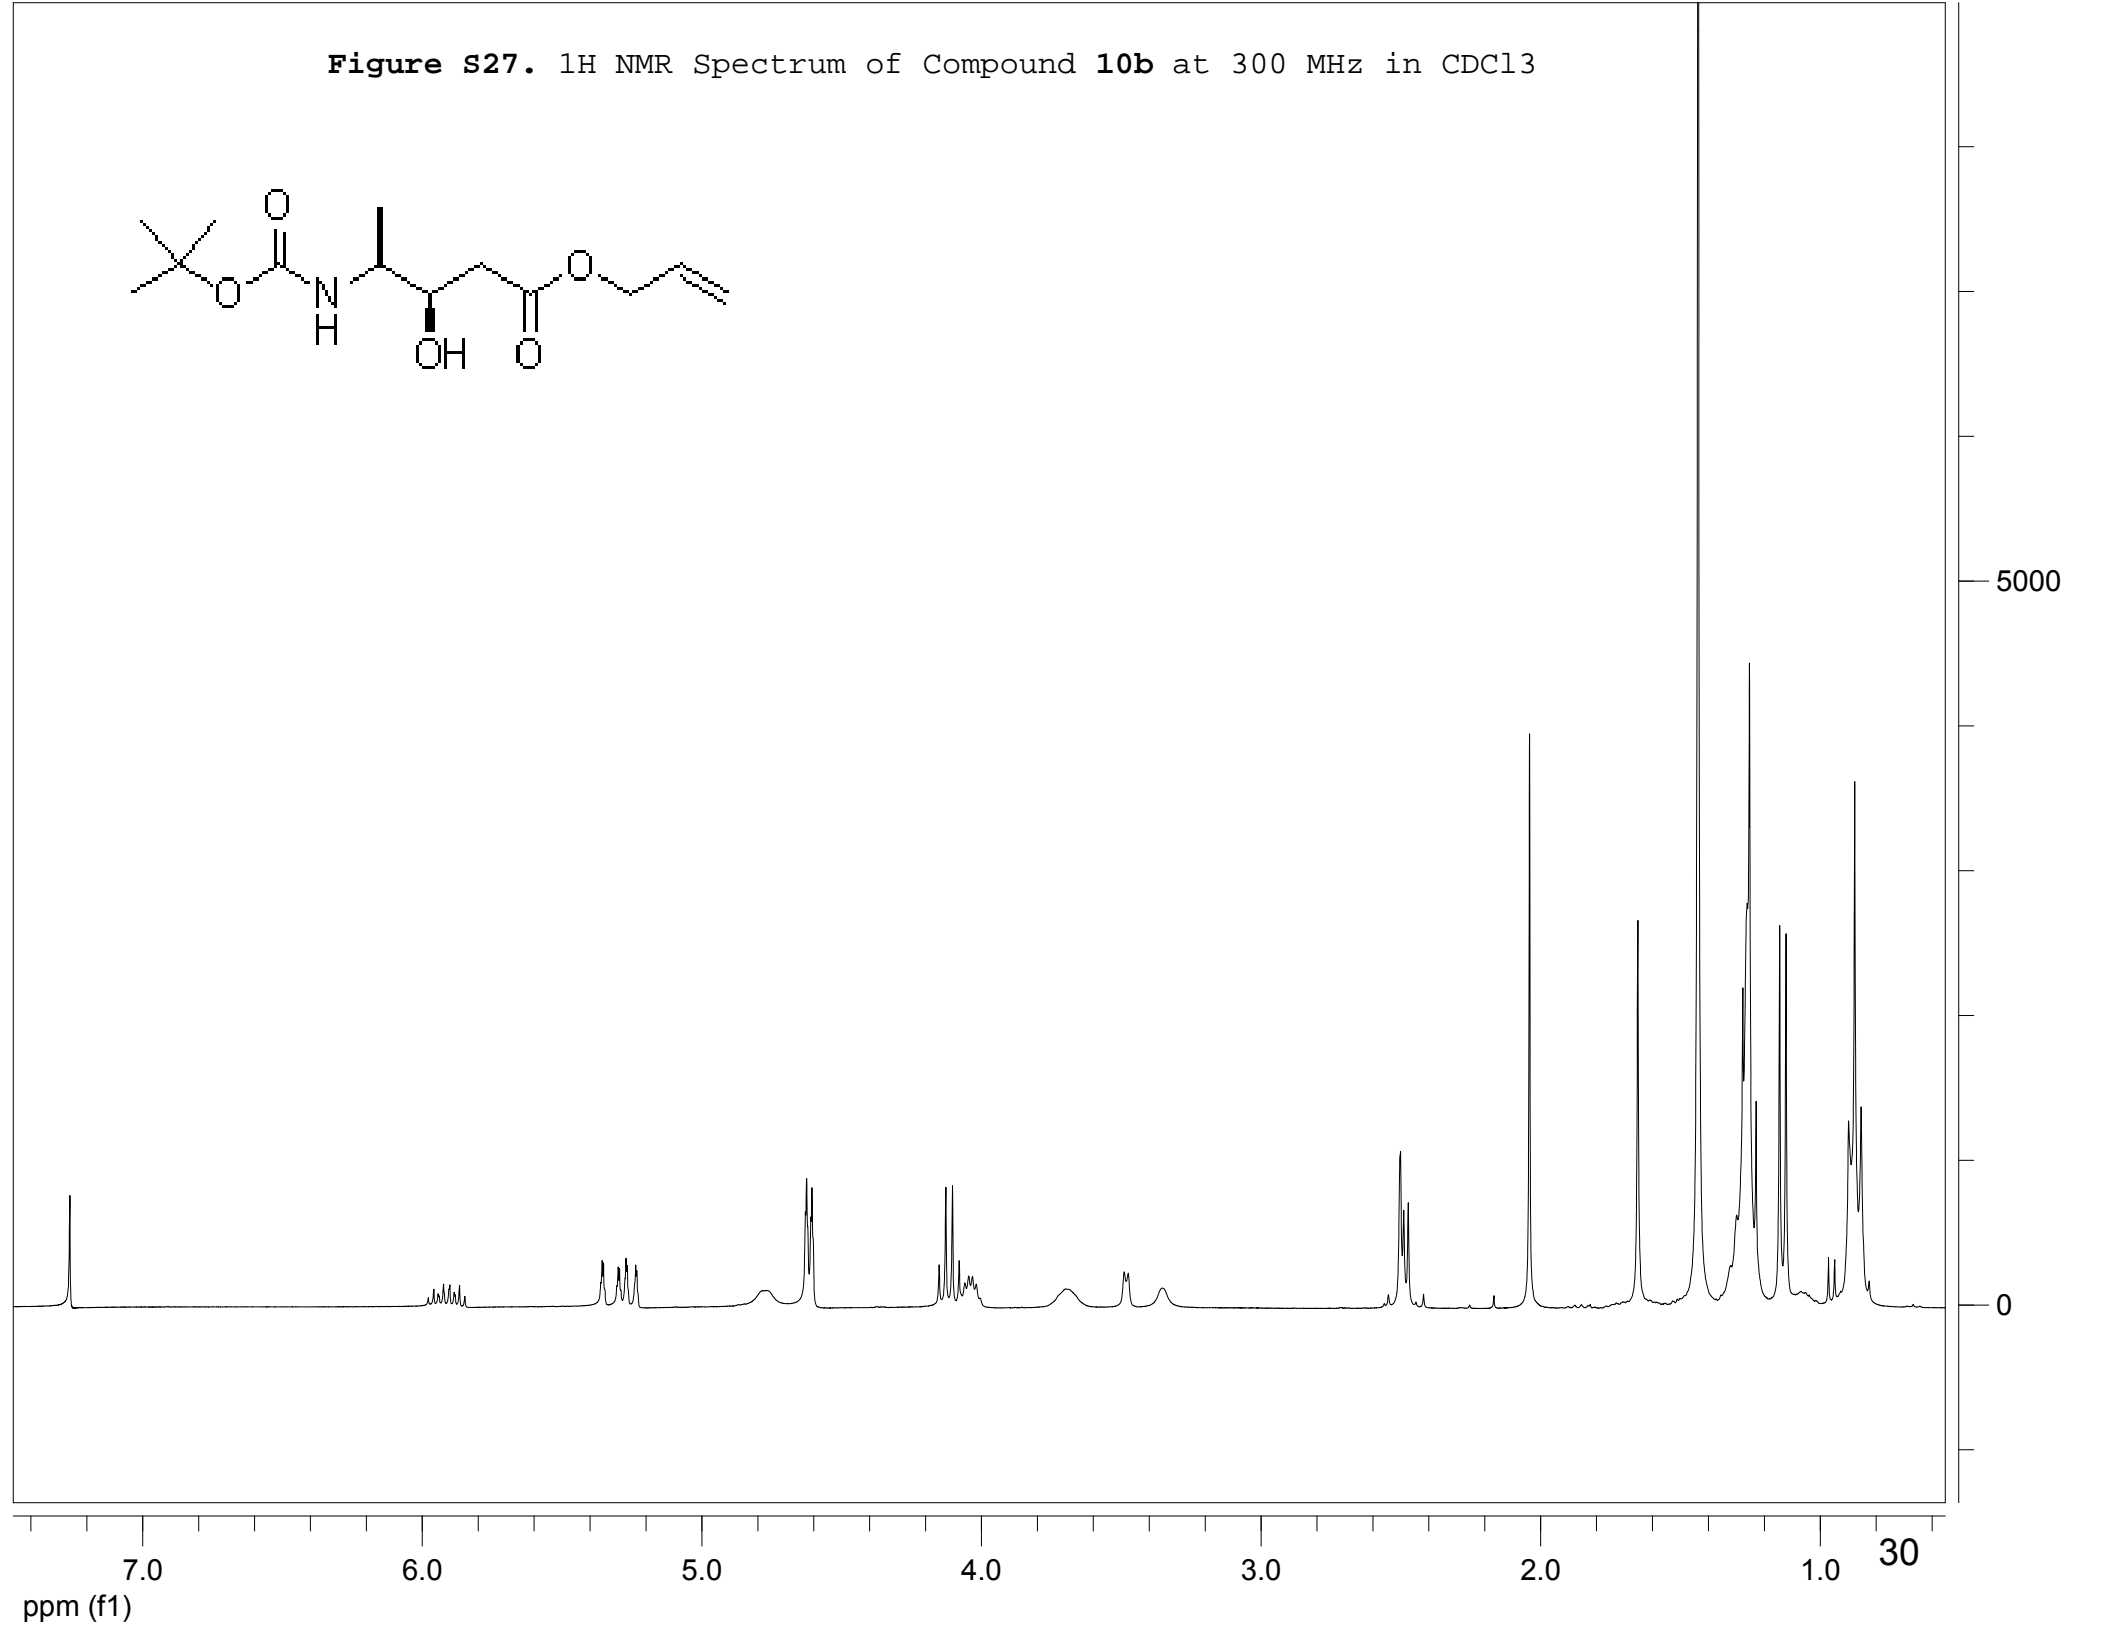

Figure S28. <sup>1</sup>H NMR Spectrum of Compound **10b** at 300 MHz in DMSO-d<sub>6</sub>

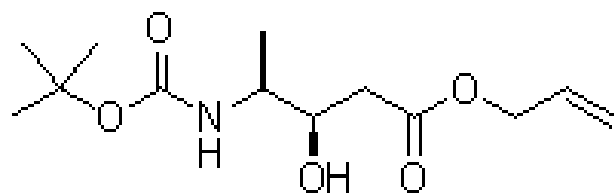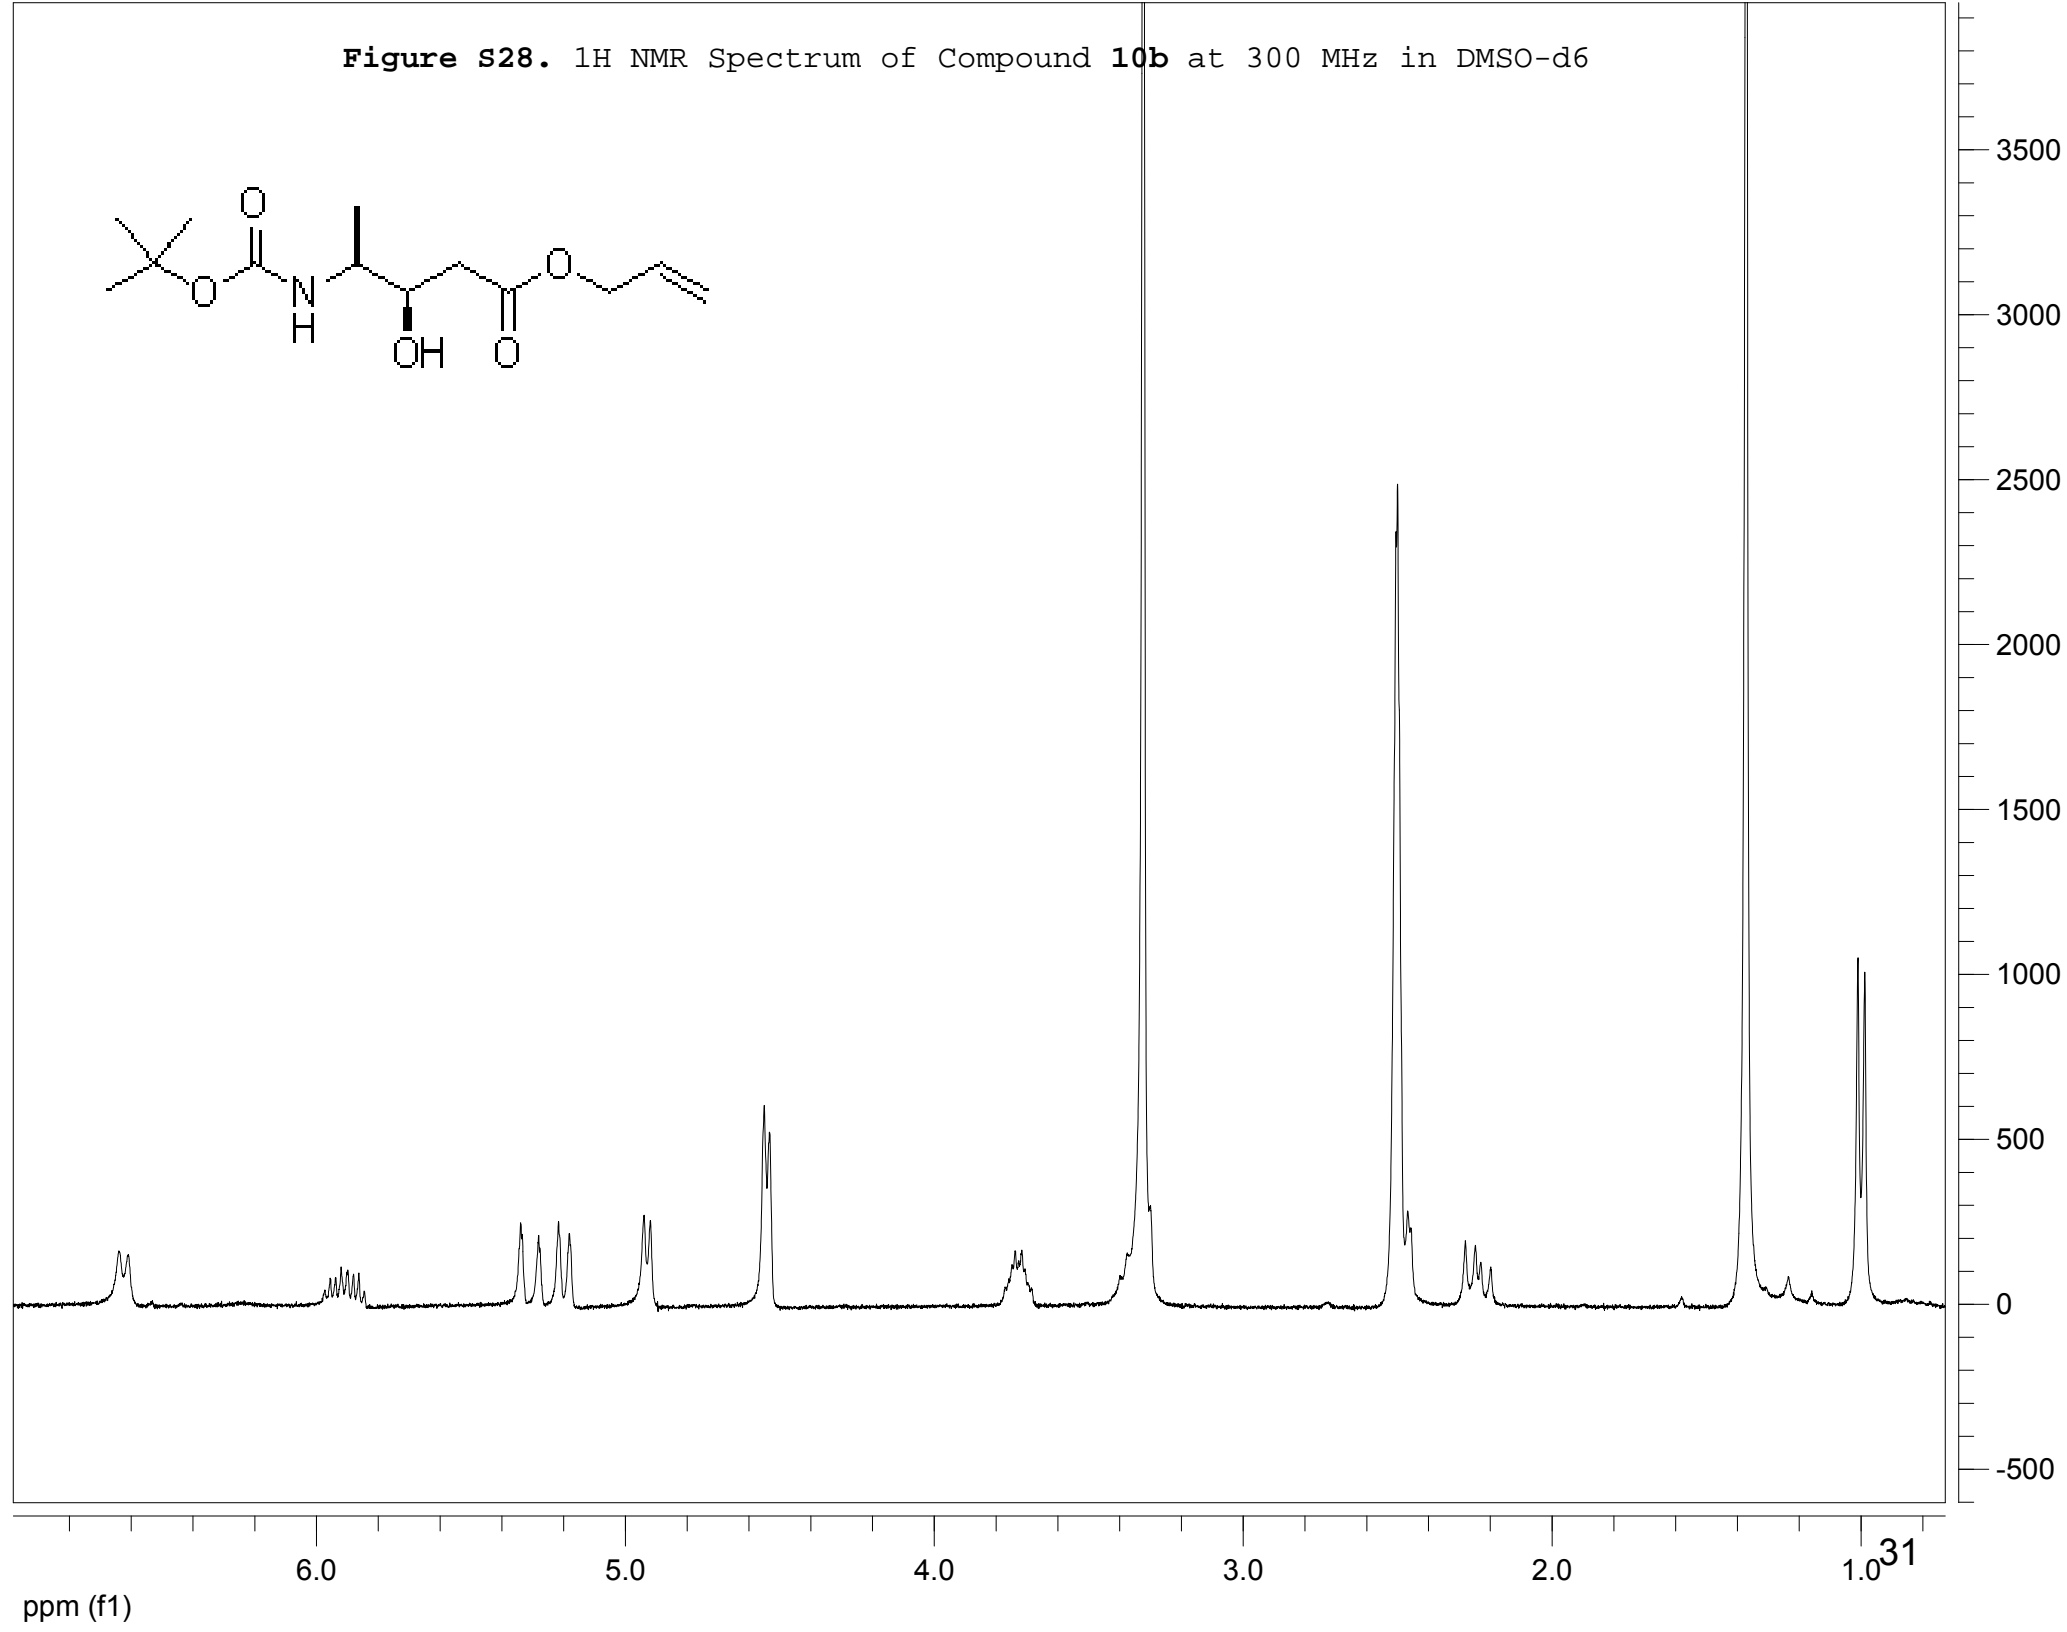

Figure S29. <sup>1</sup>H NMR Spectrum of Compound **11a** at 300 MHz in CDCl<sub>3</sub>

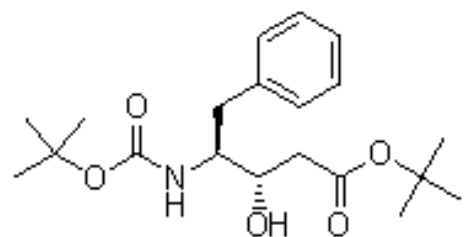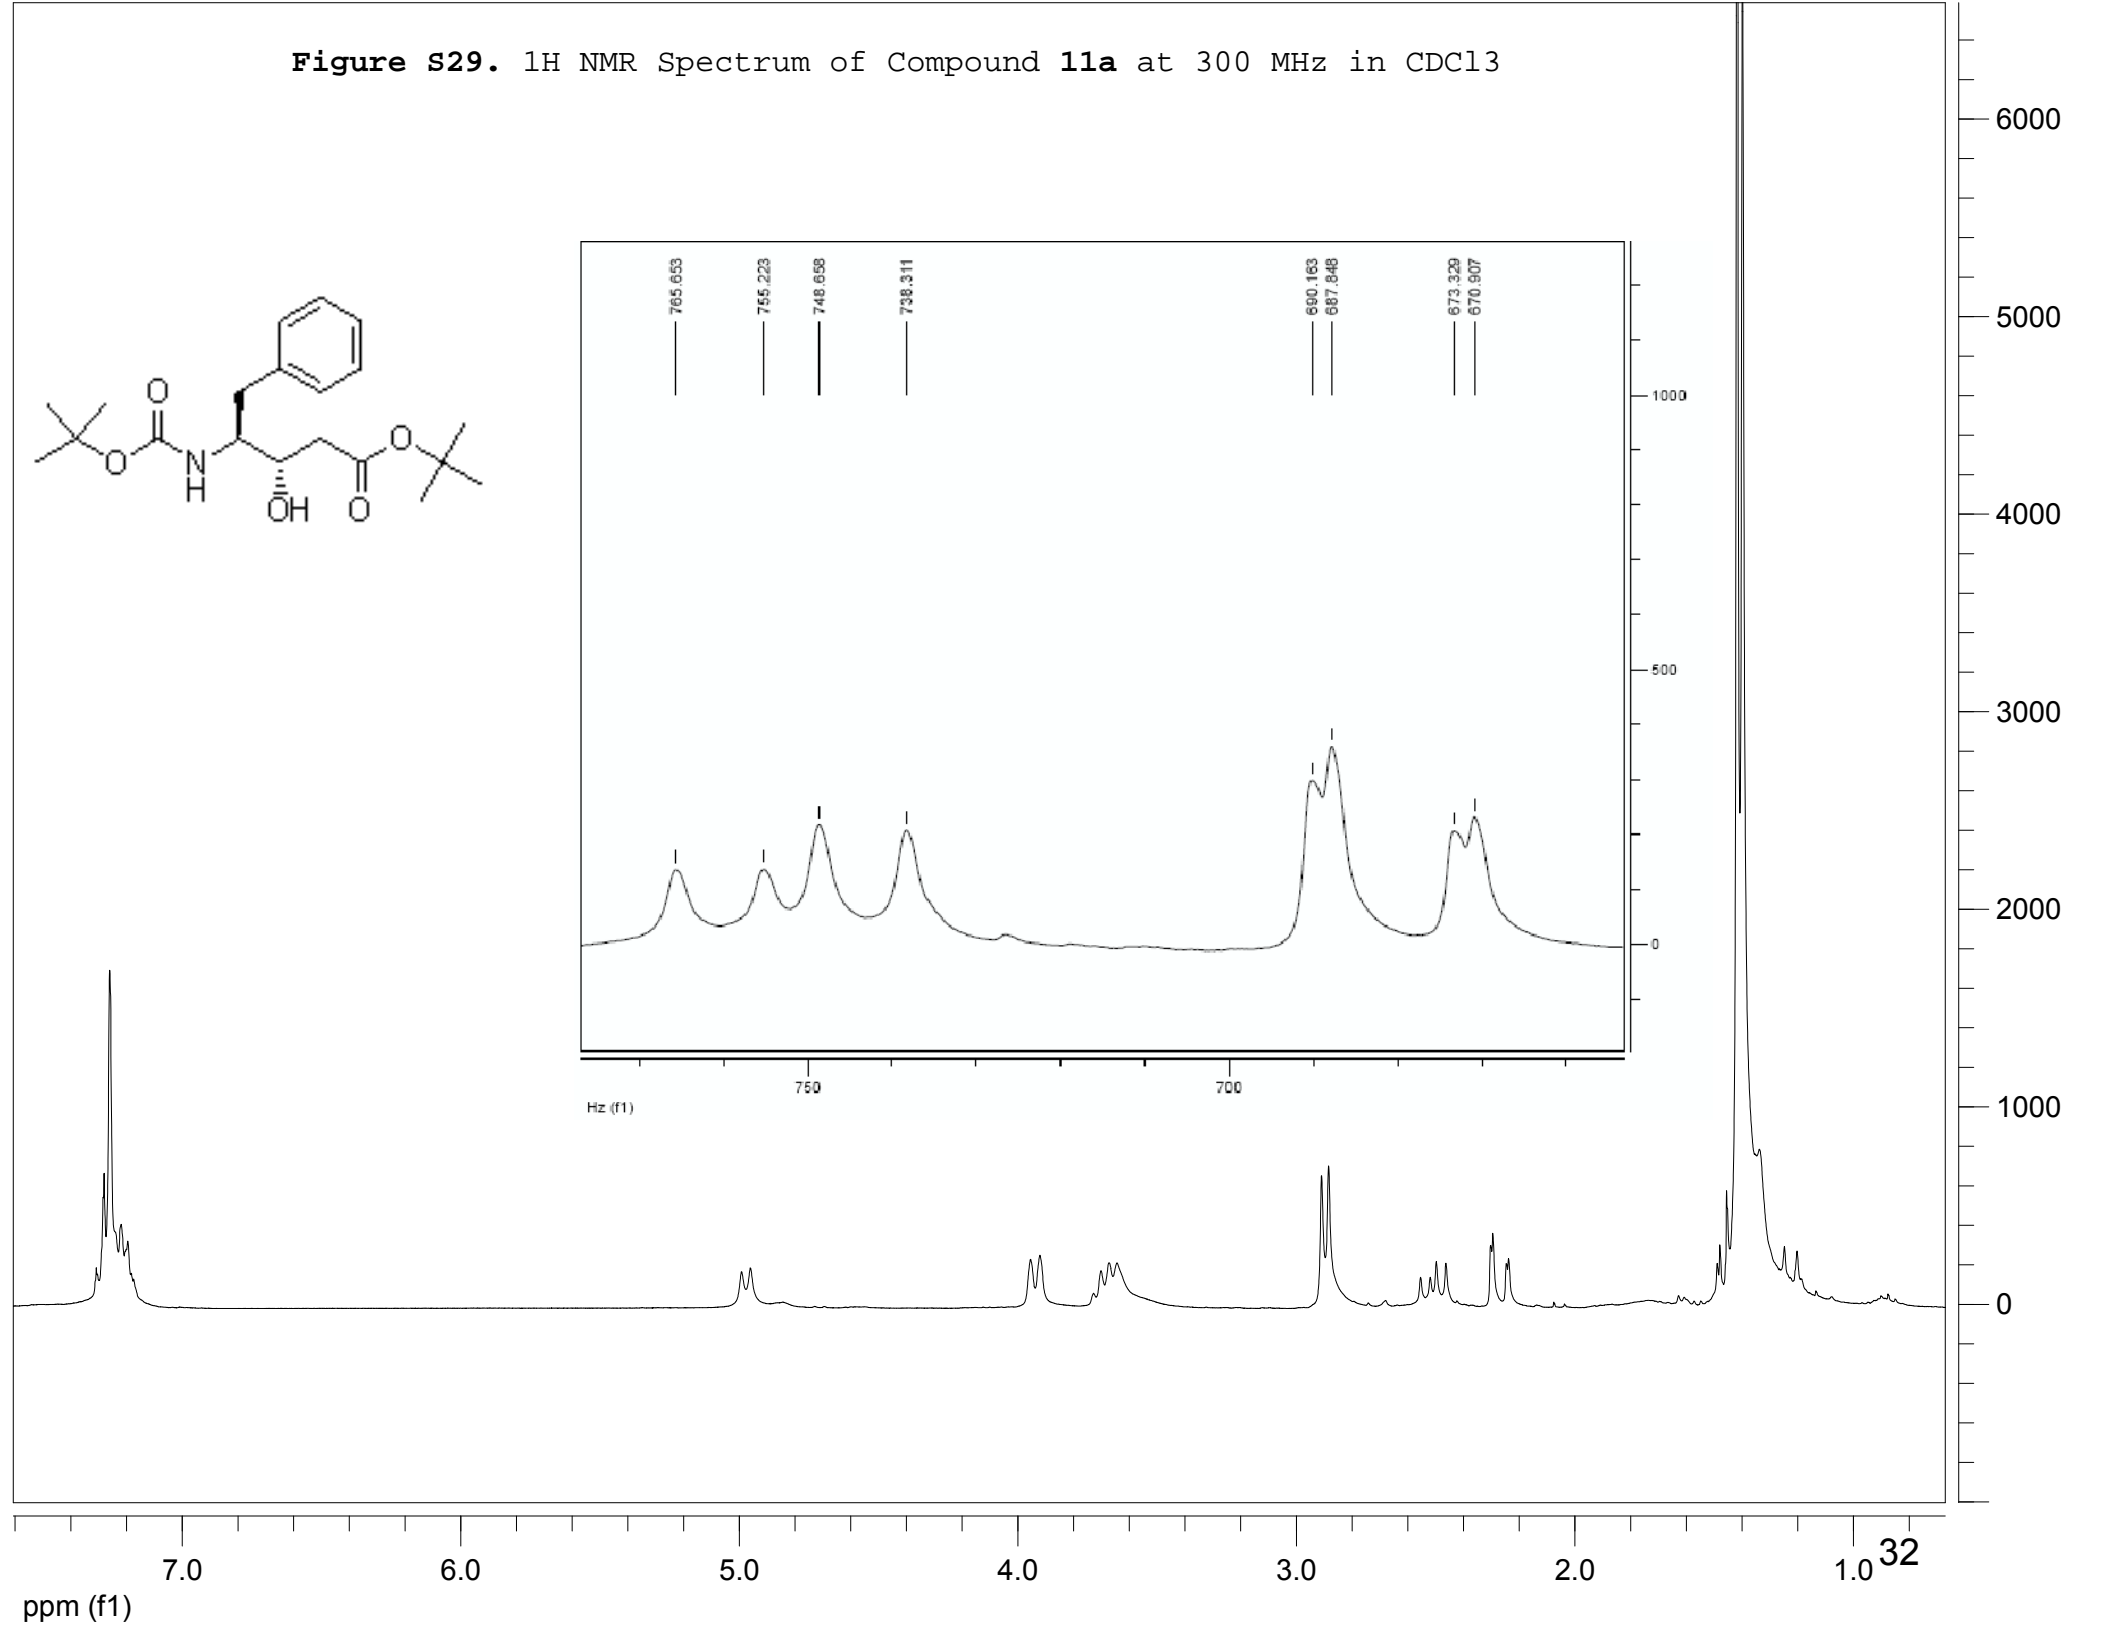



Figure S30. <sup>1</sup>H NMR Spectrum of Compound **11a** at 300 MHz in DMSO-d<sub>6</sub>

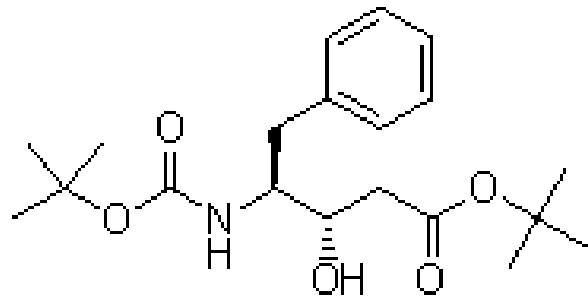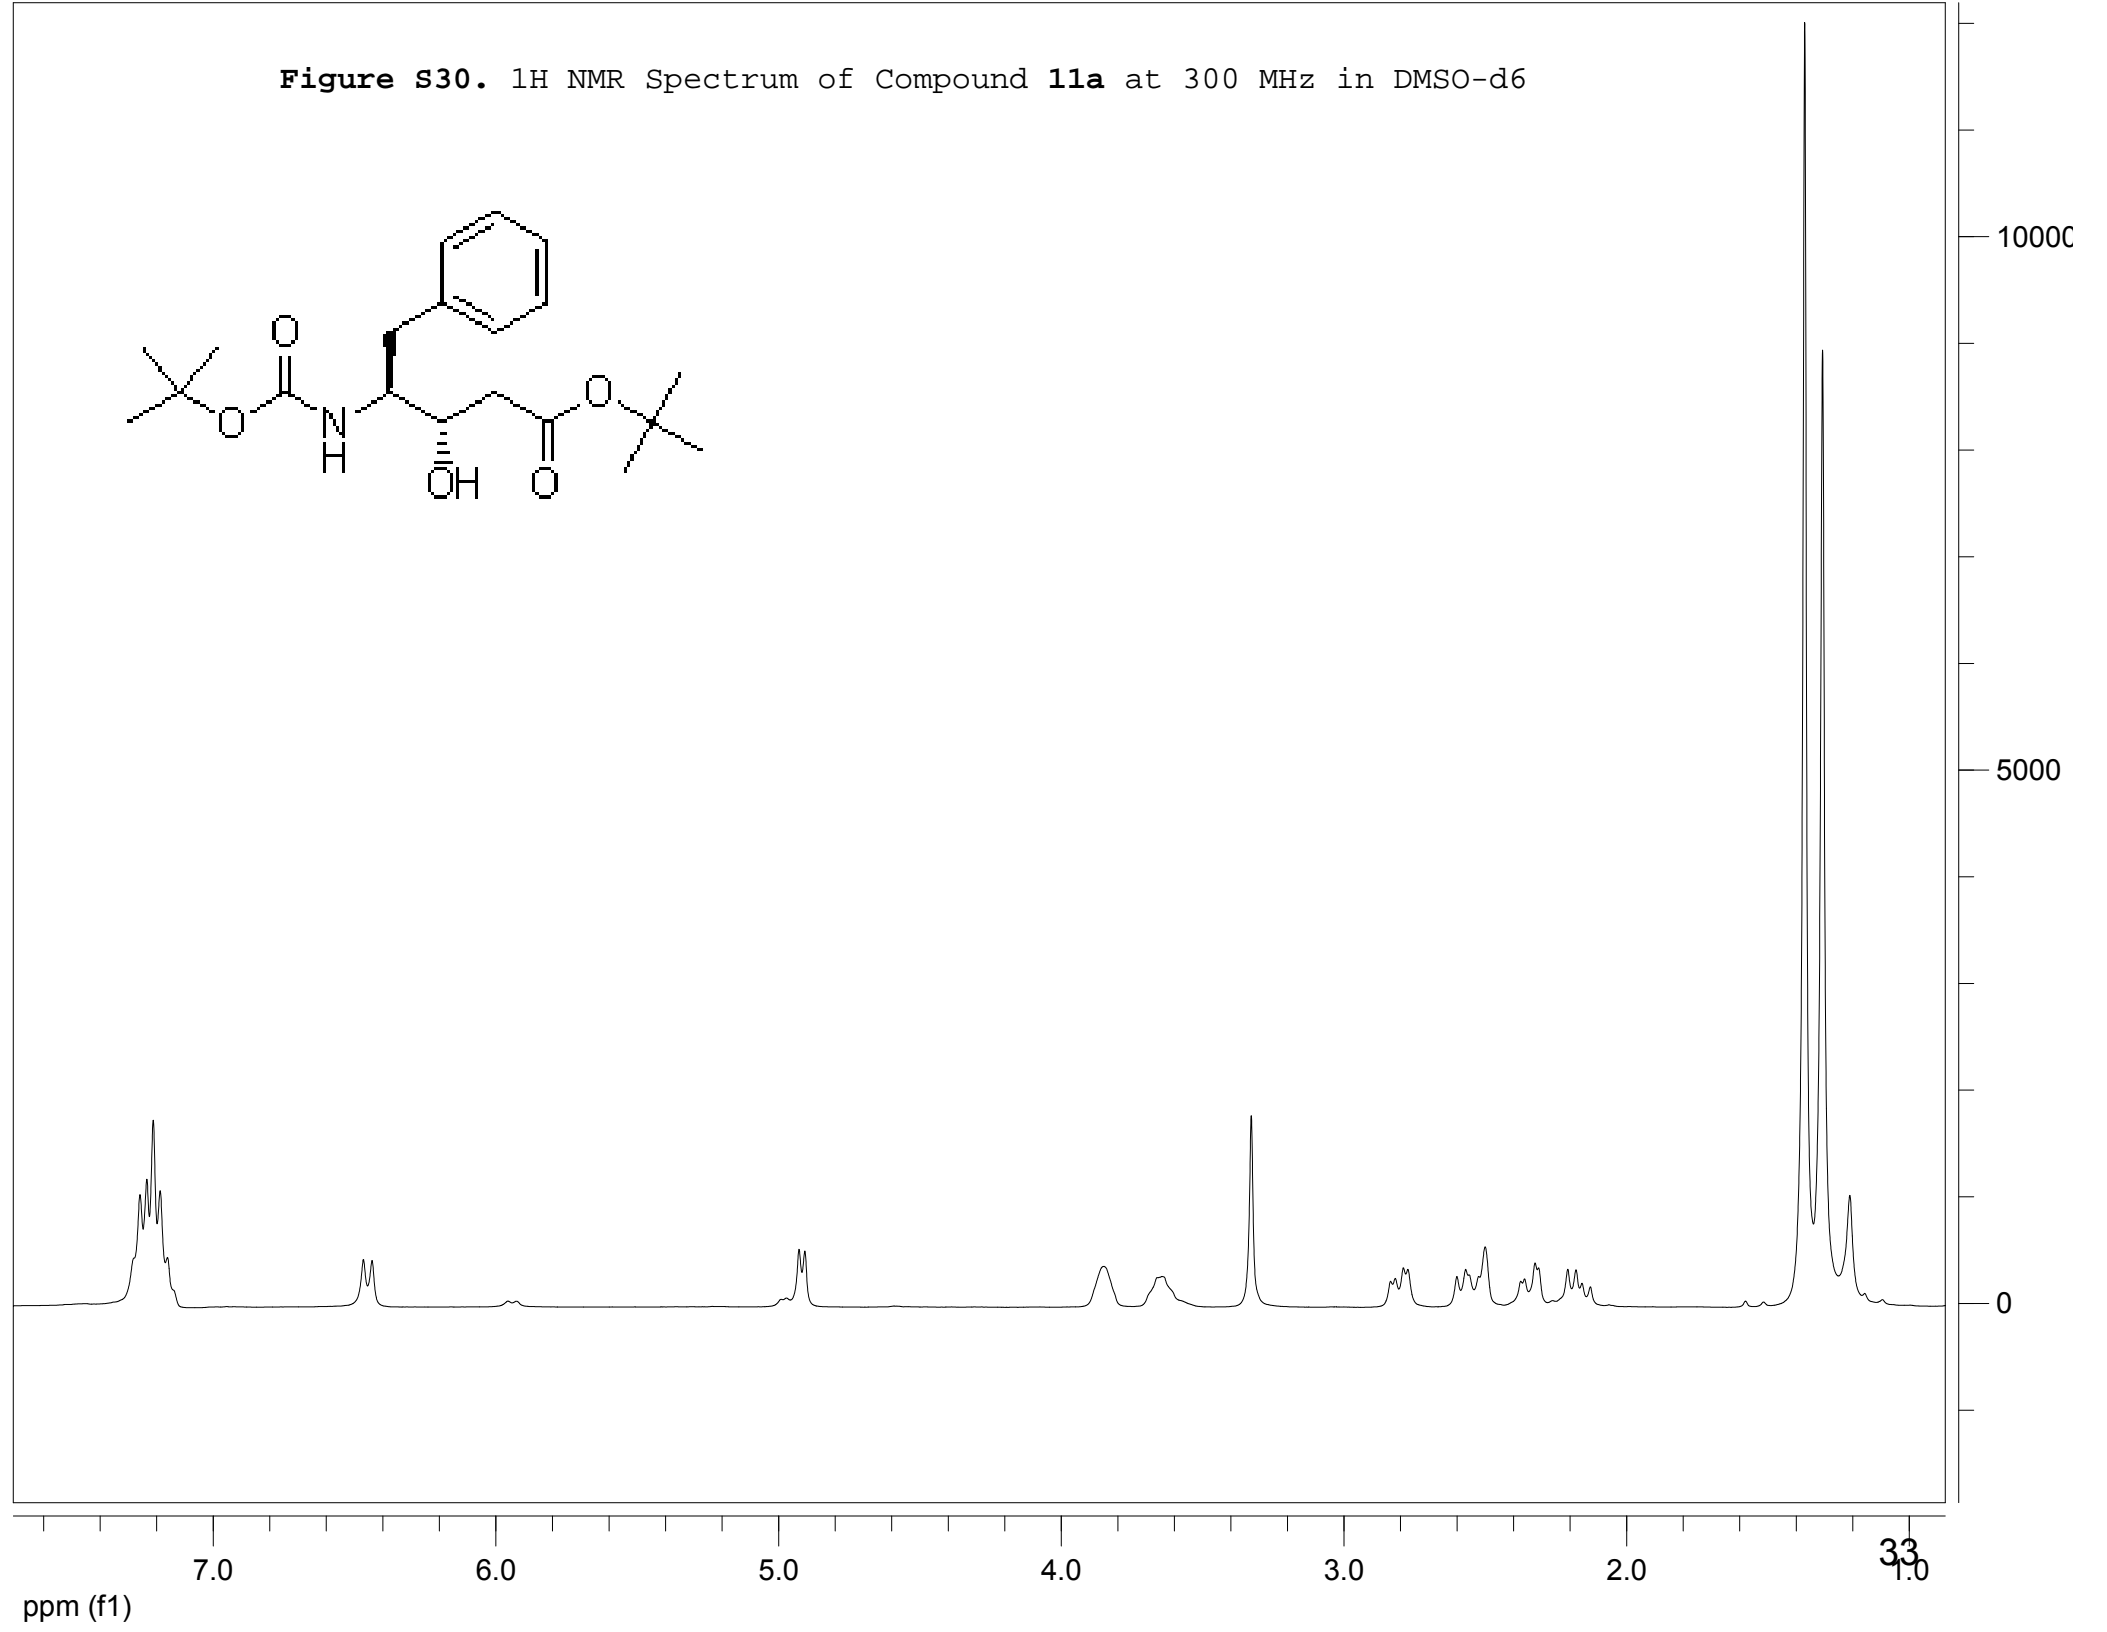

Figure S31. <sup>1</sup>H NMR Spectrum of Compound **11b** at 300 MHz in CDCl<sub>3</sub>

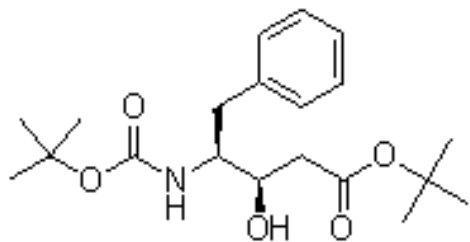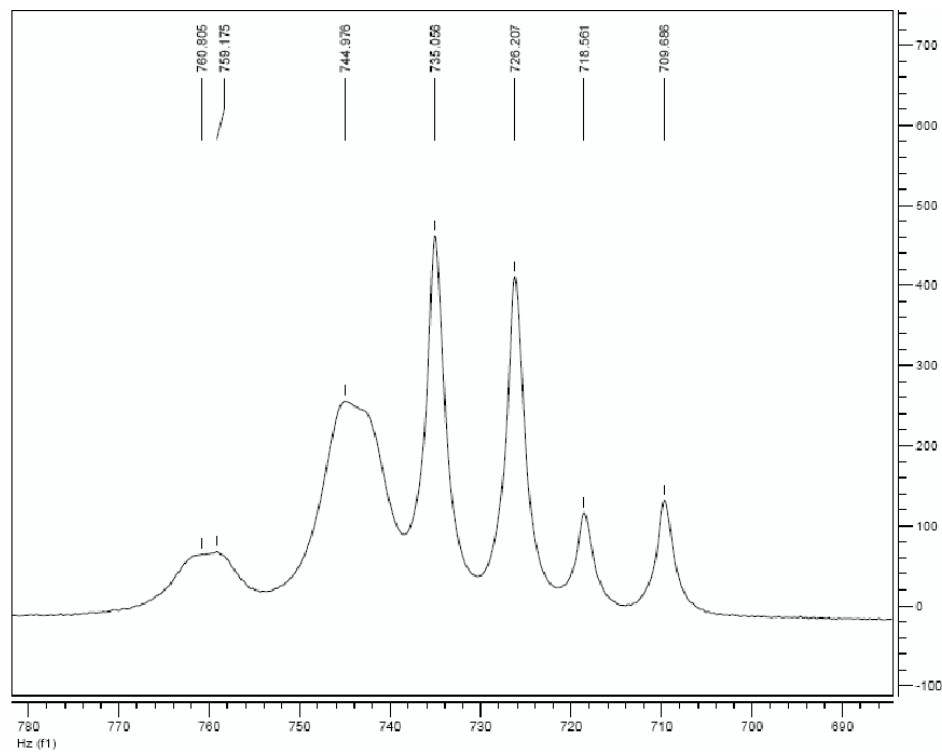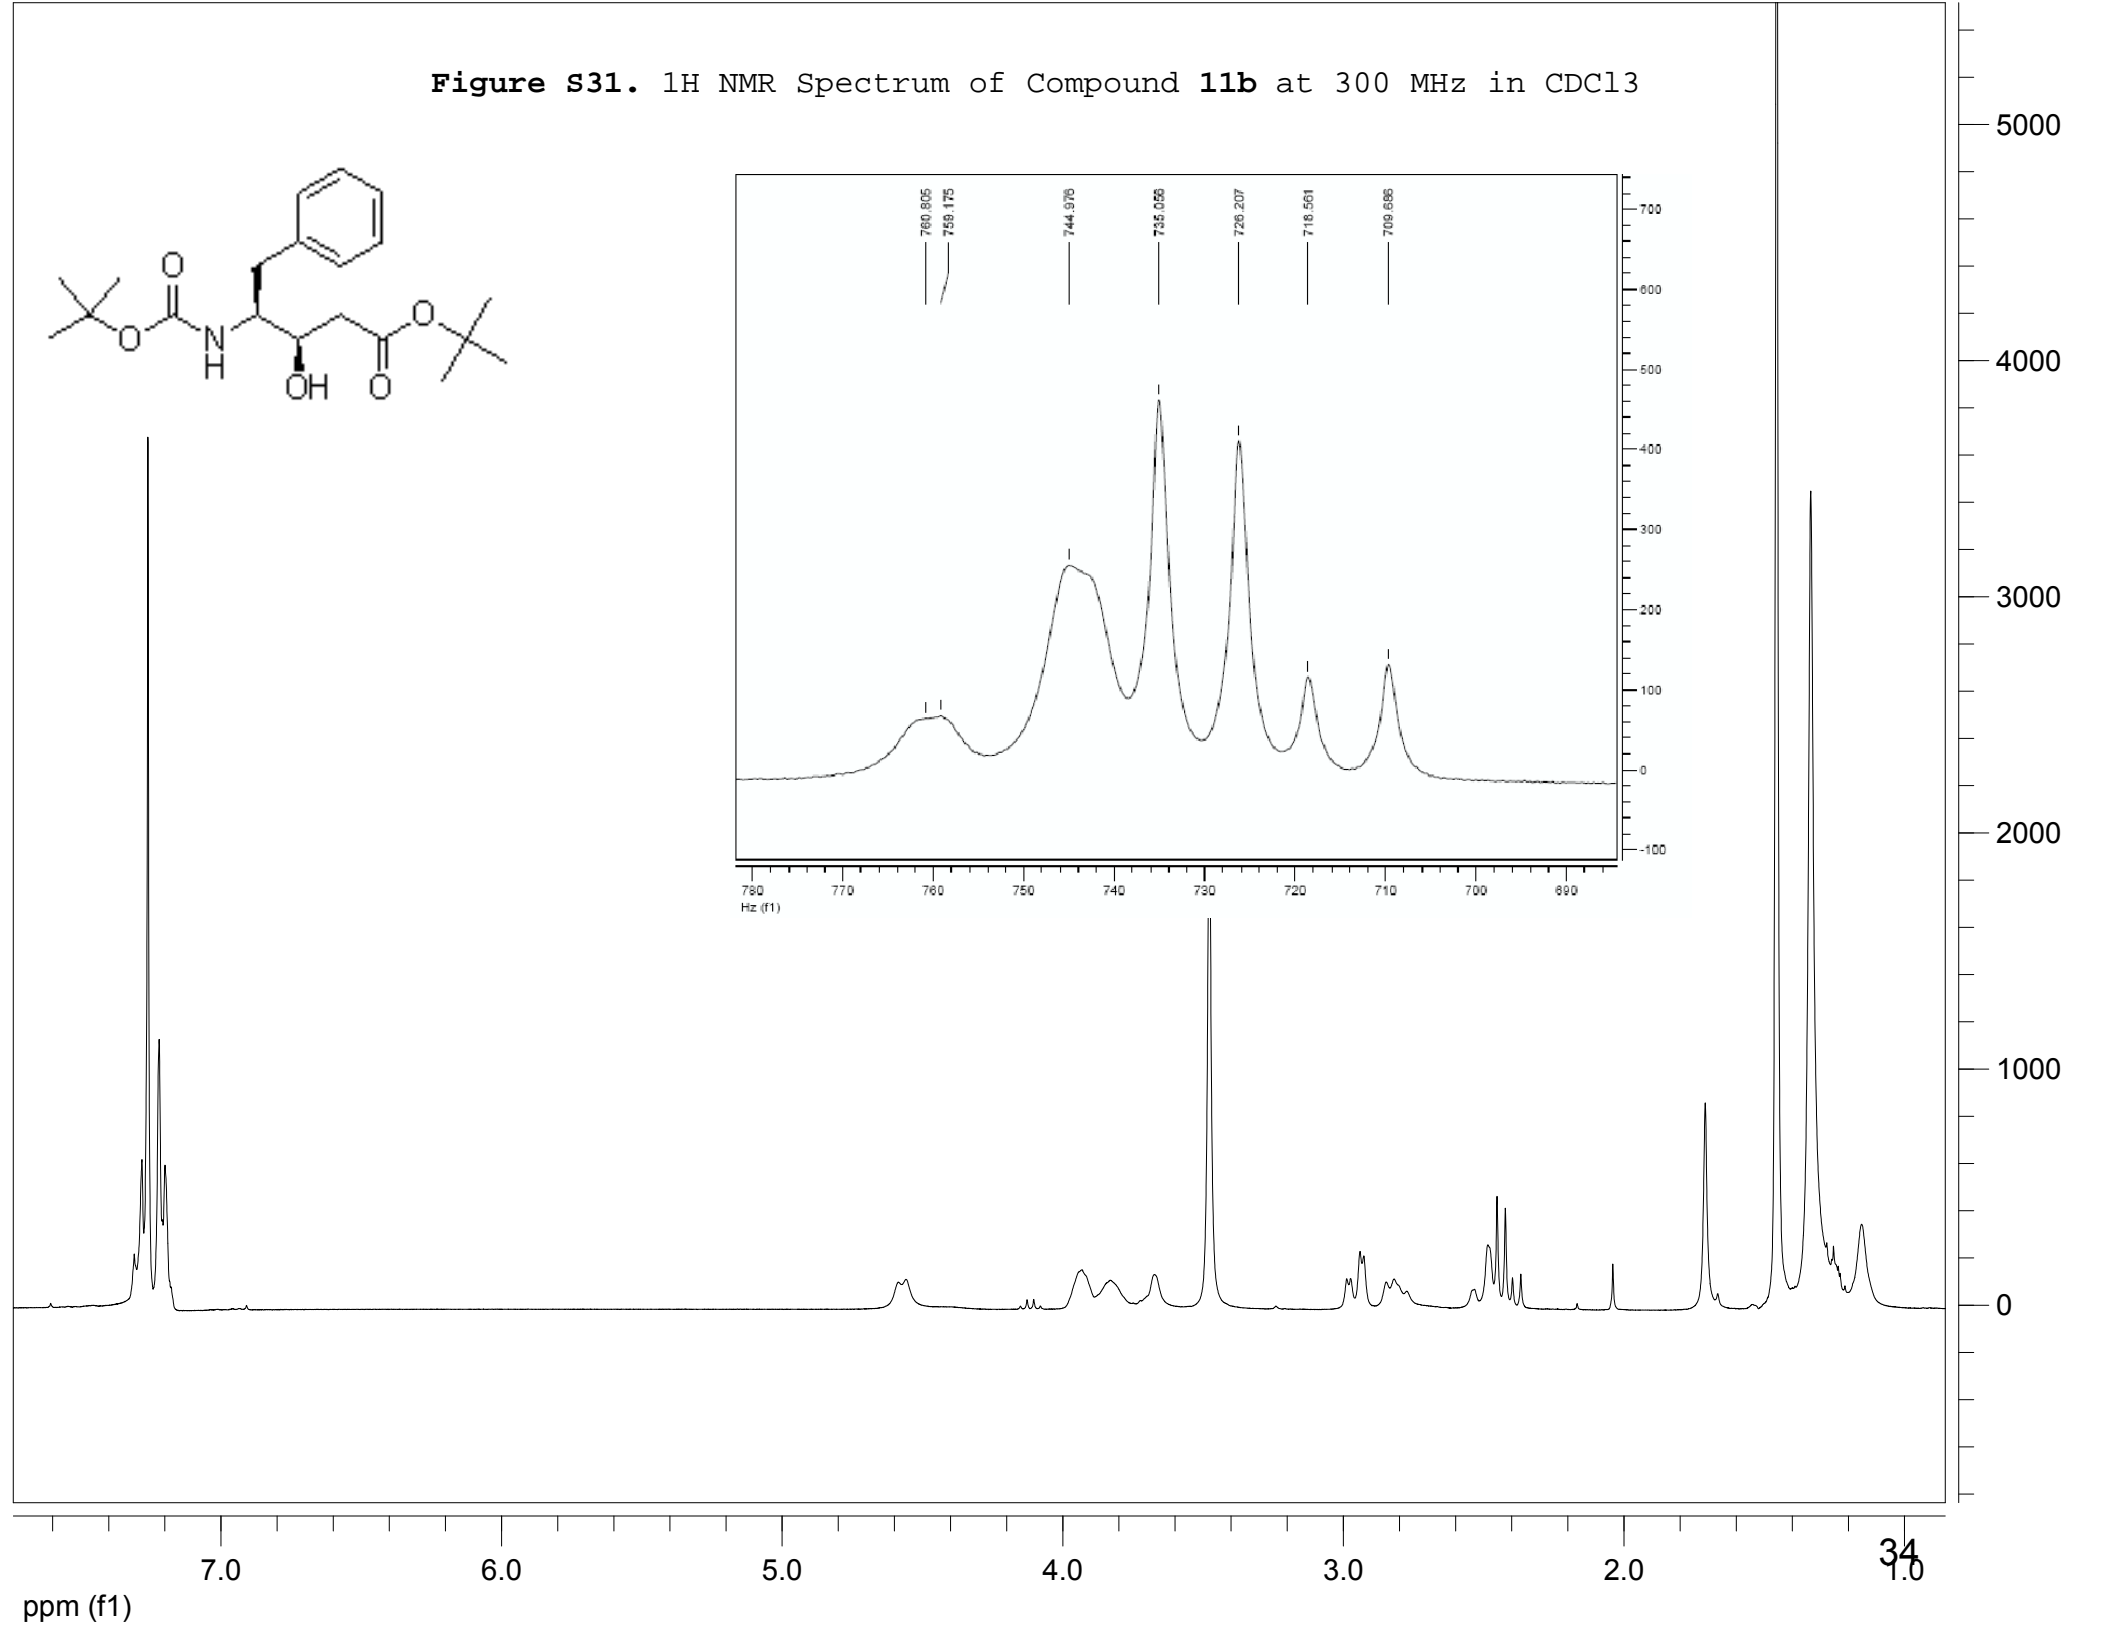

Figure S32. <sup>1</sup>H NMR Spectrum of Compound **11b** at 300 MHz in DMSO-d<sub>6</sub>

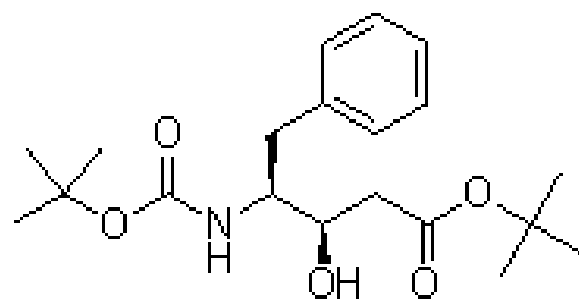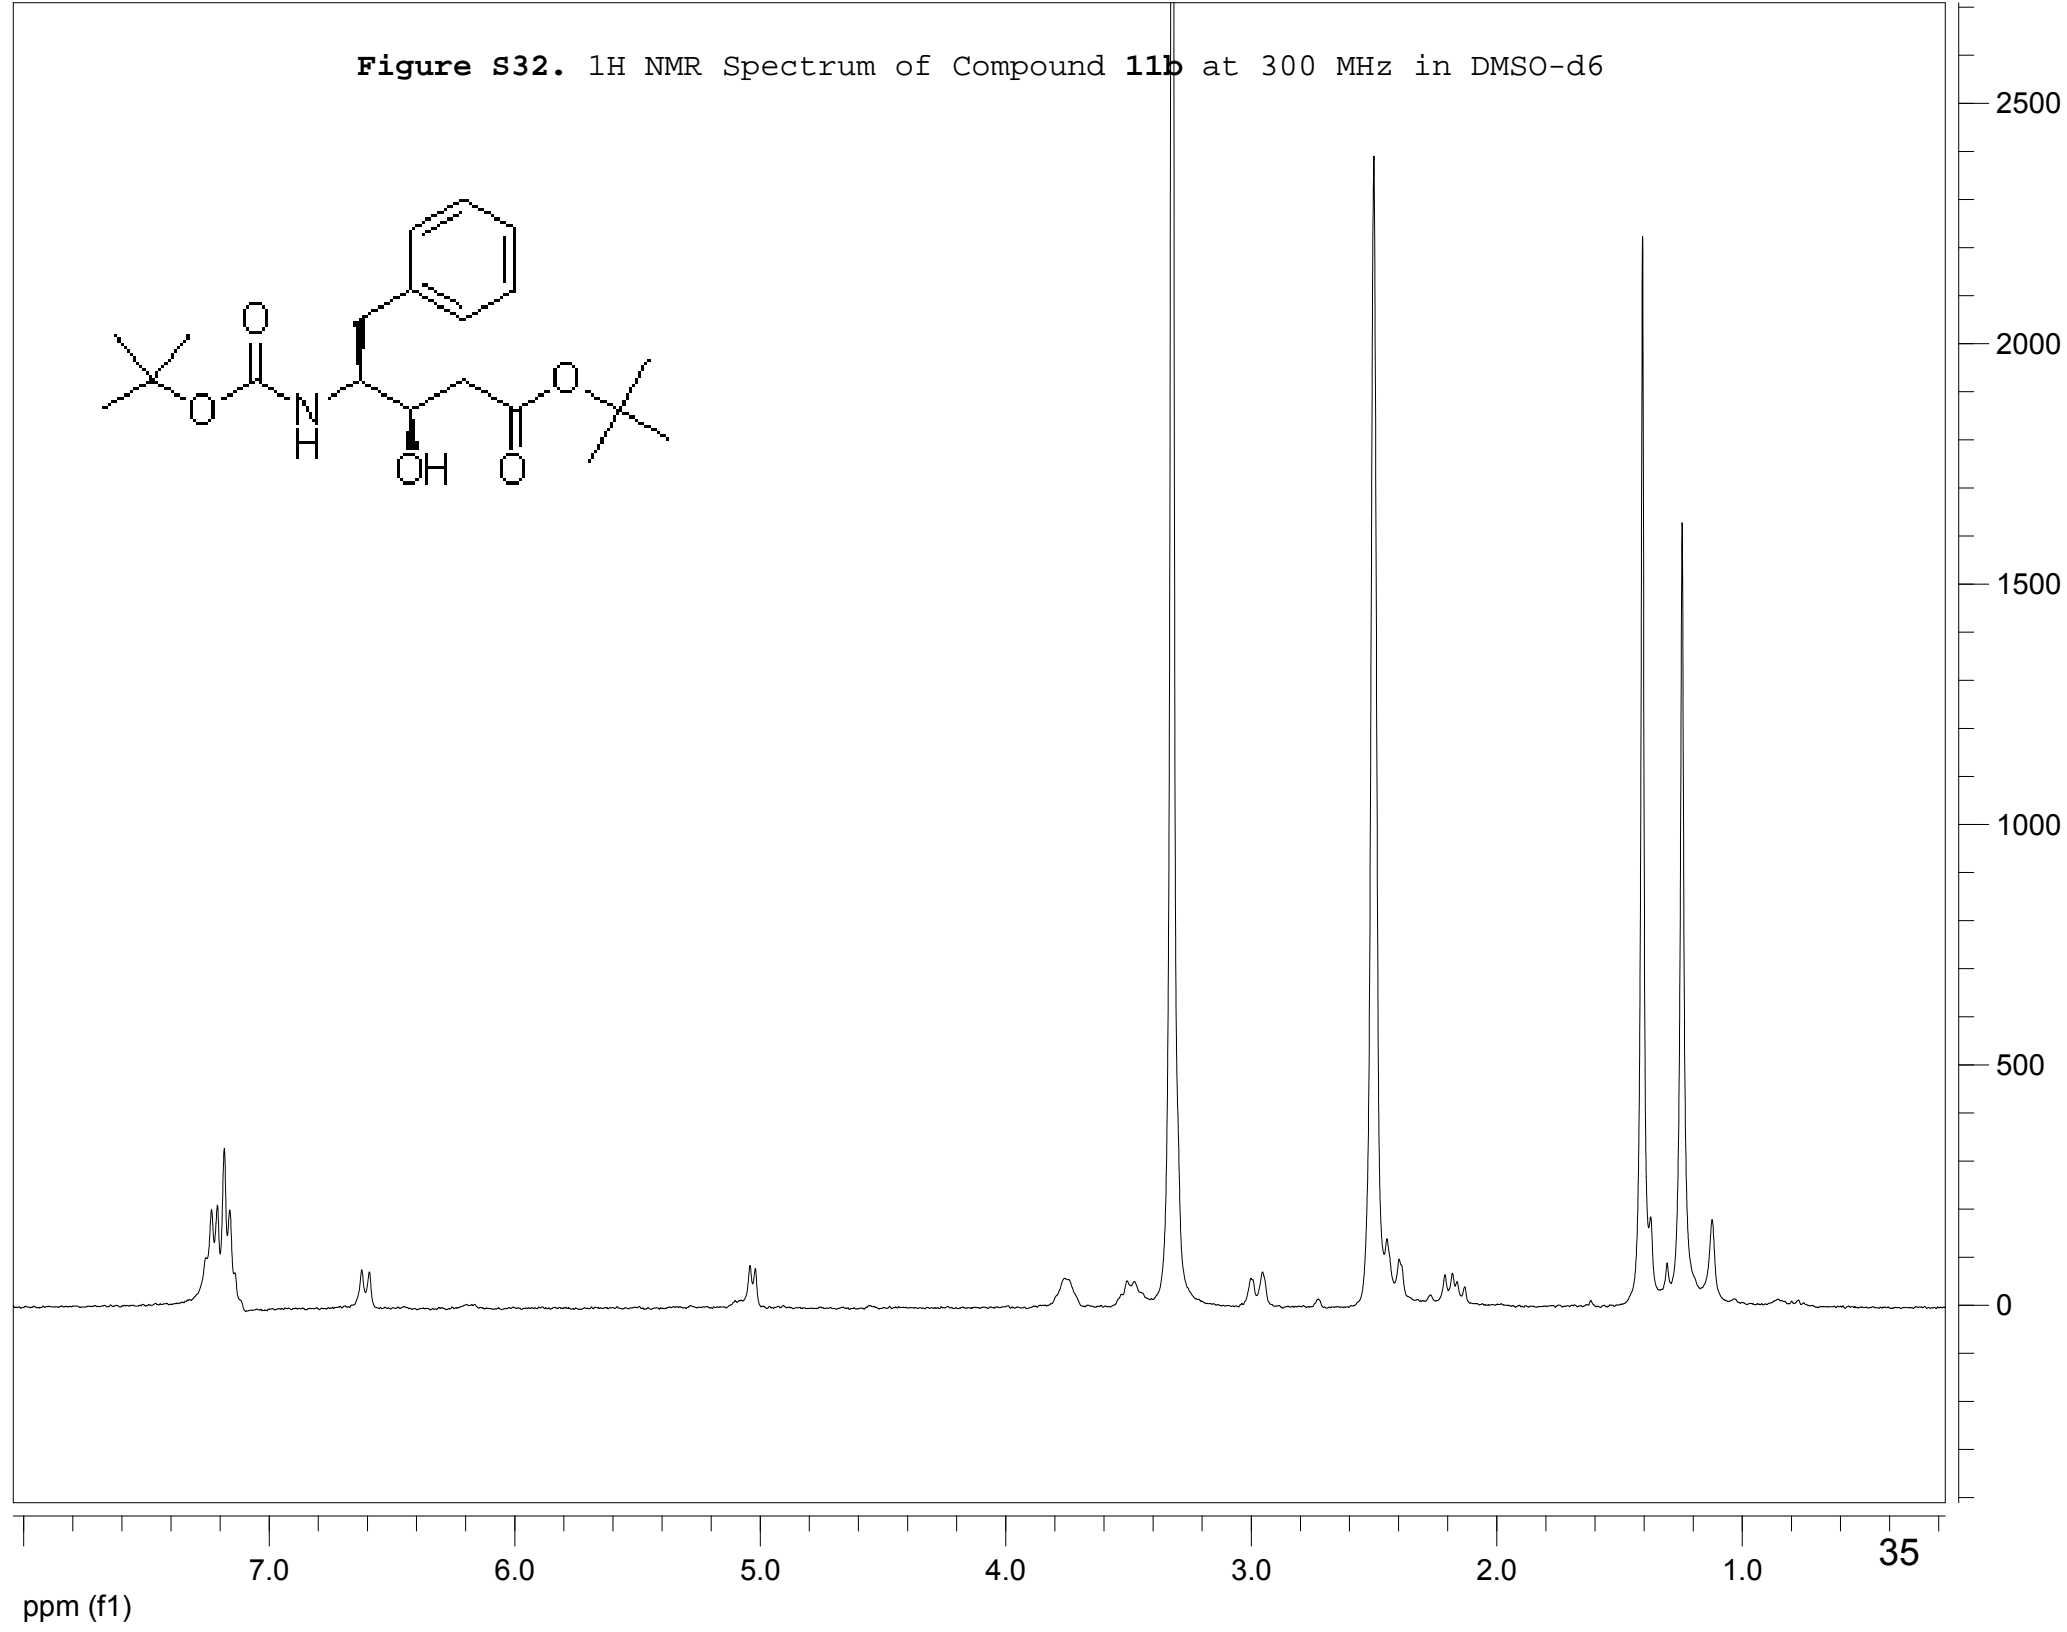

Figure S33. <sup>1</sup>H NMR Spectrum of Compound **11c** at 500 MHz in CDCl<sub>3</sub>

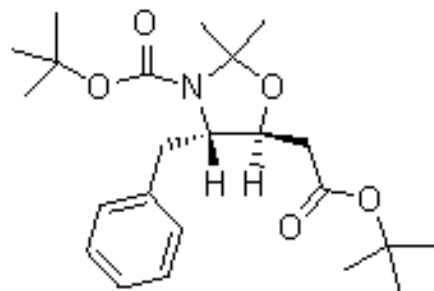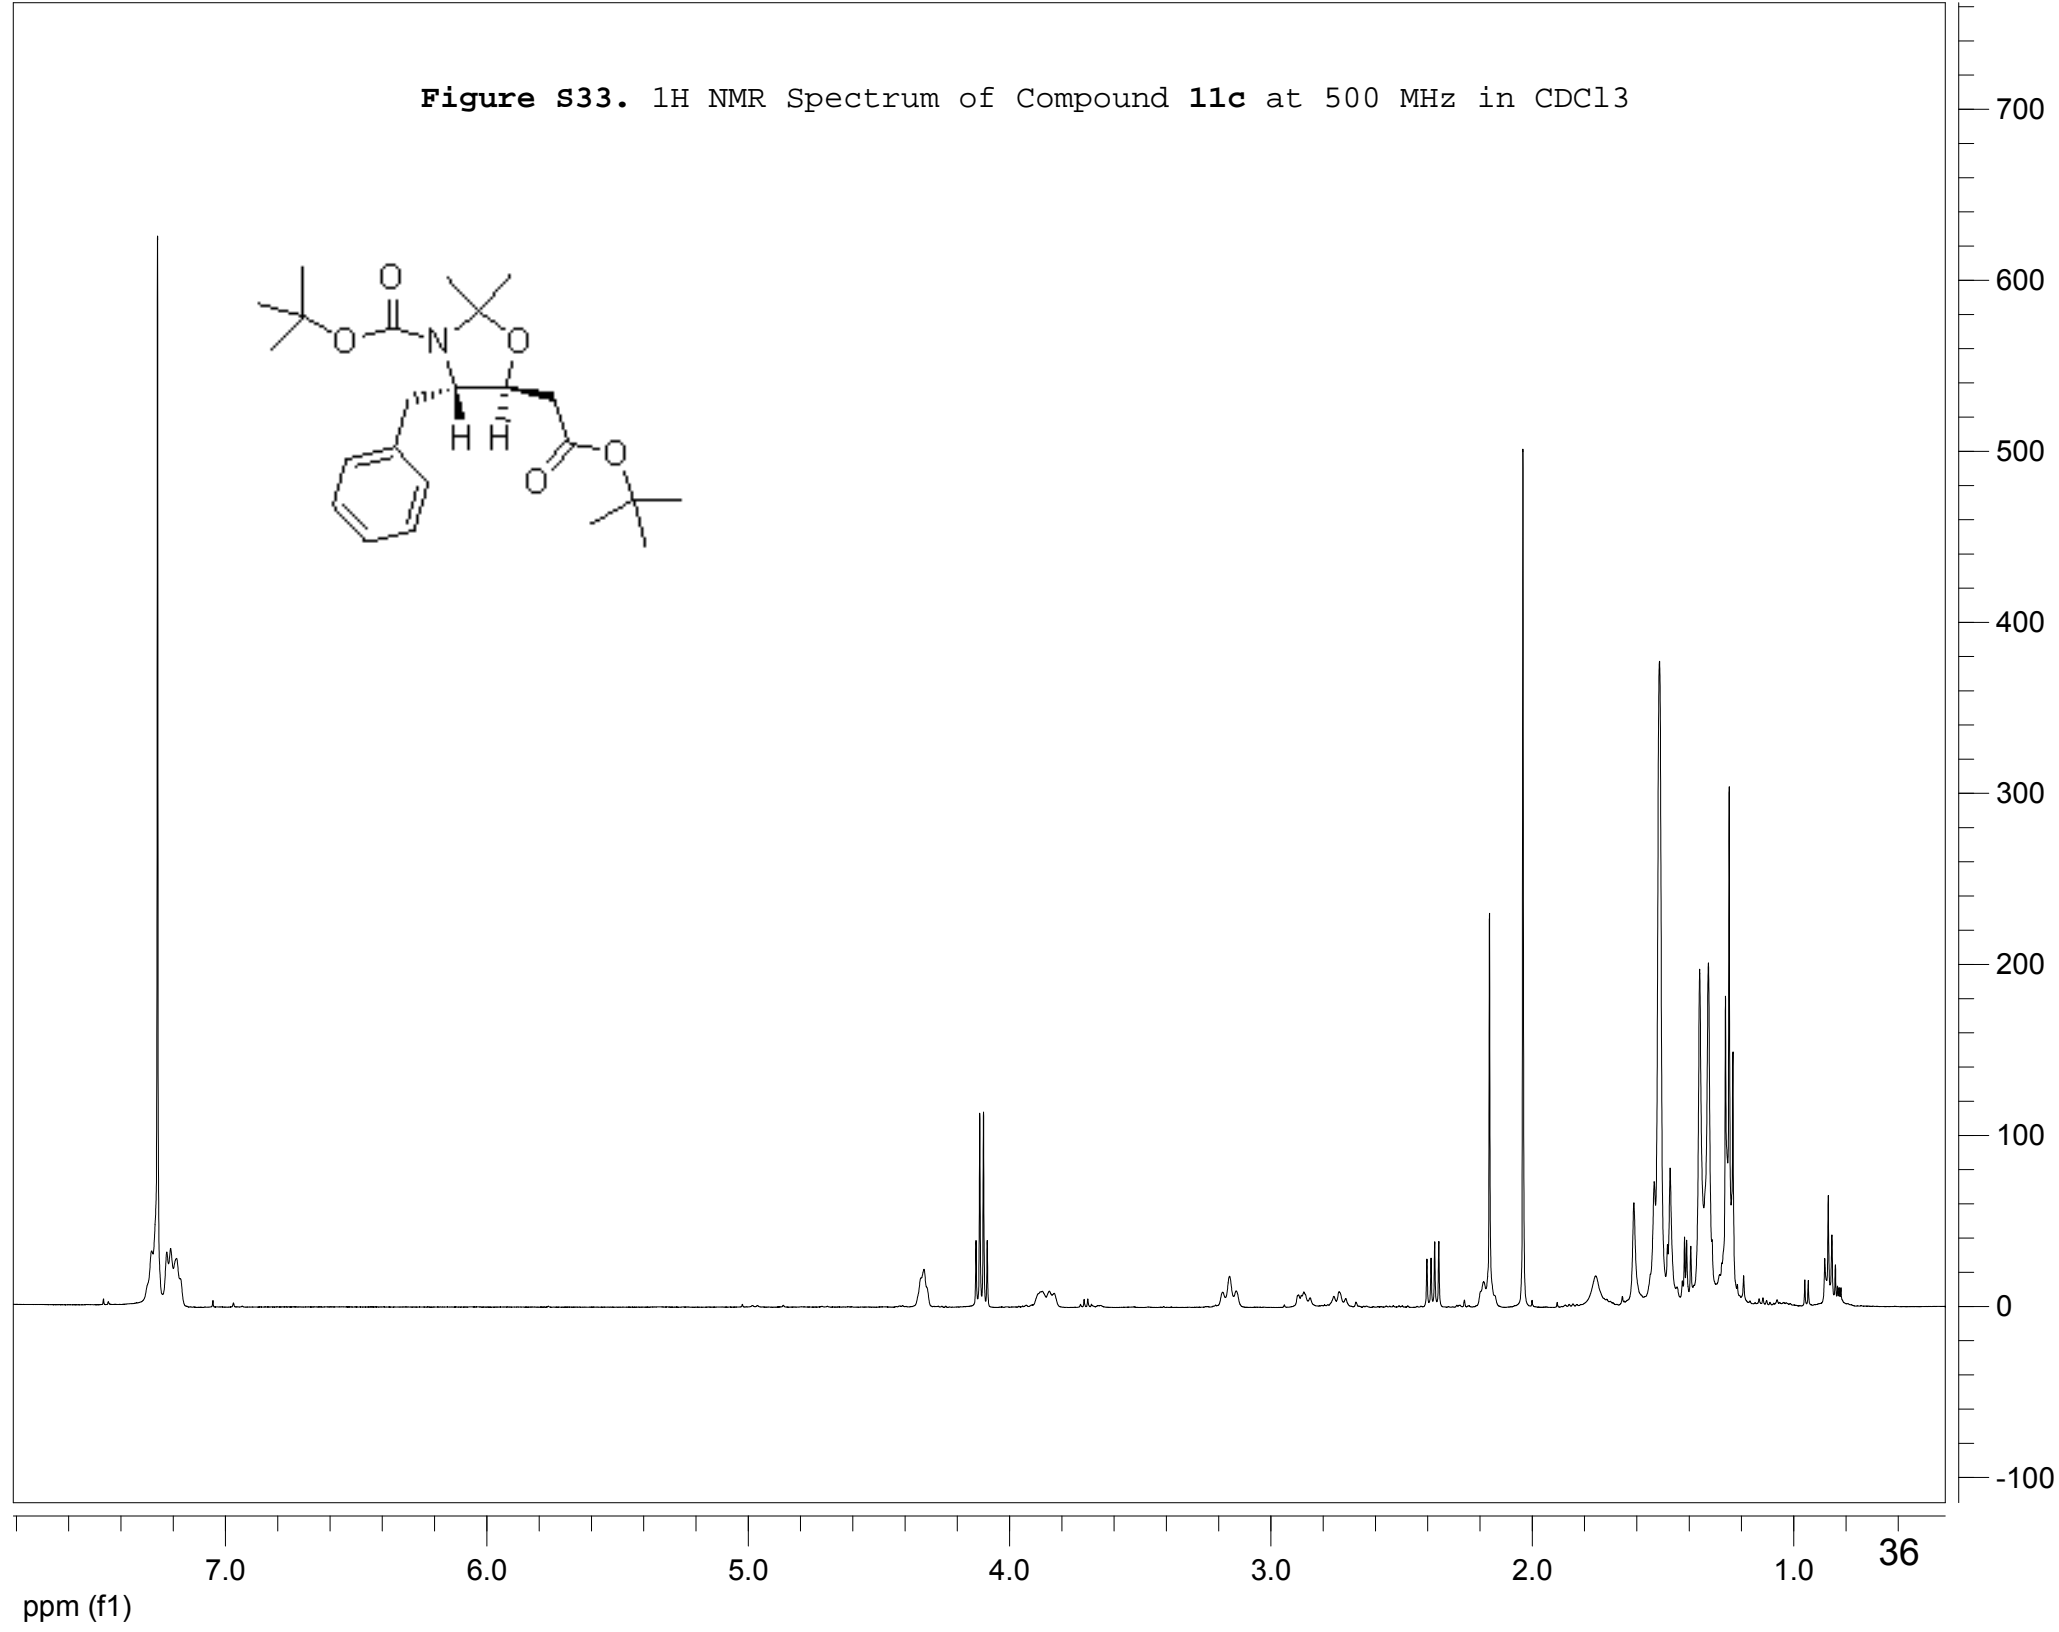

Figure S34. <sup>1</sup>H NMR Spectrum of Compound 12a at 300 MHz in CDCl<sub>3</sub>

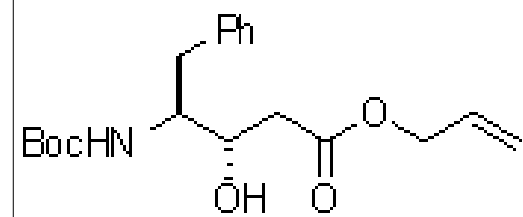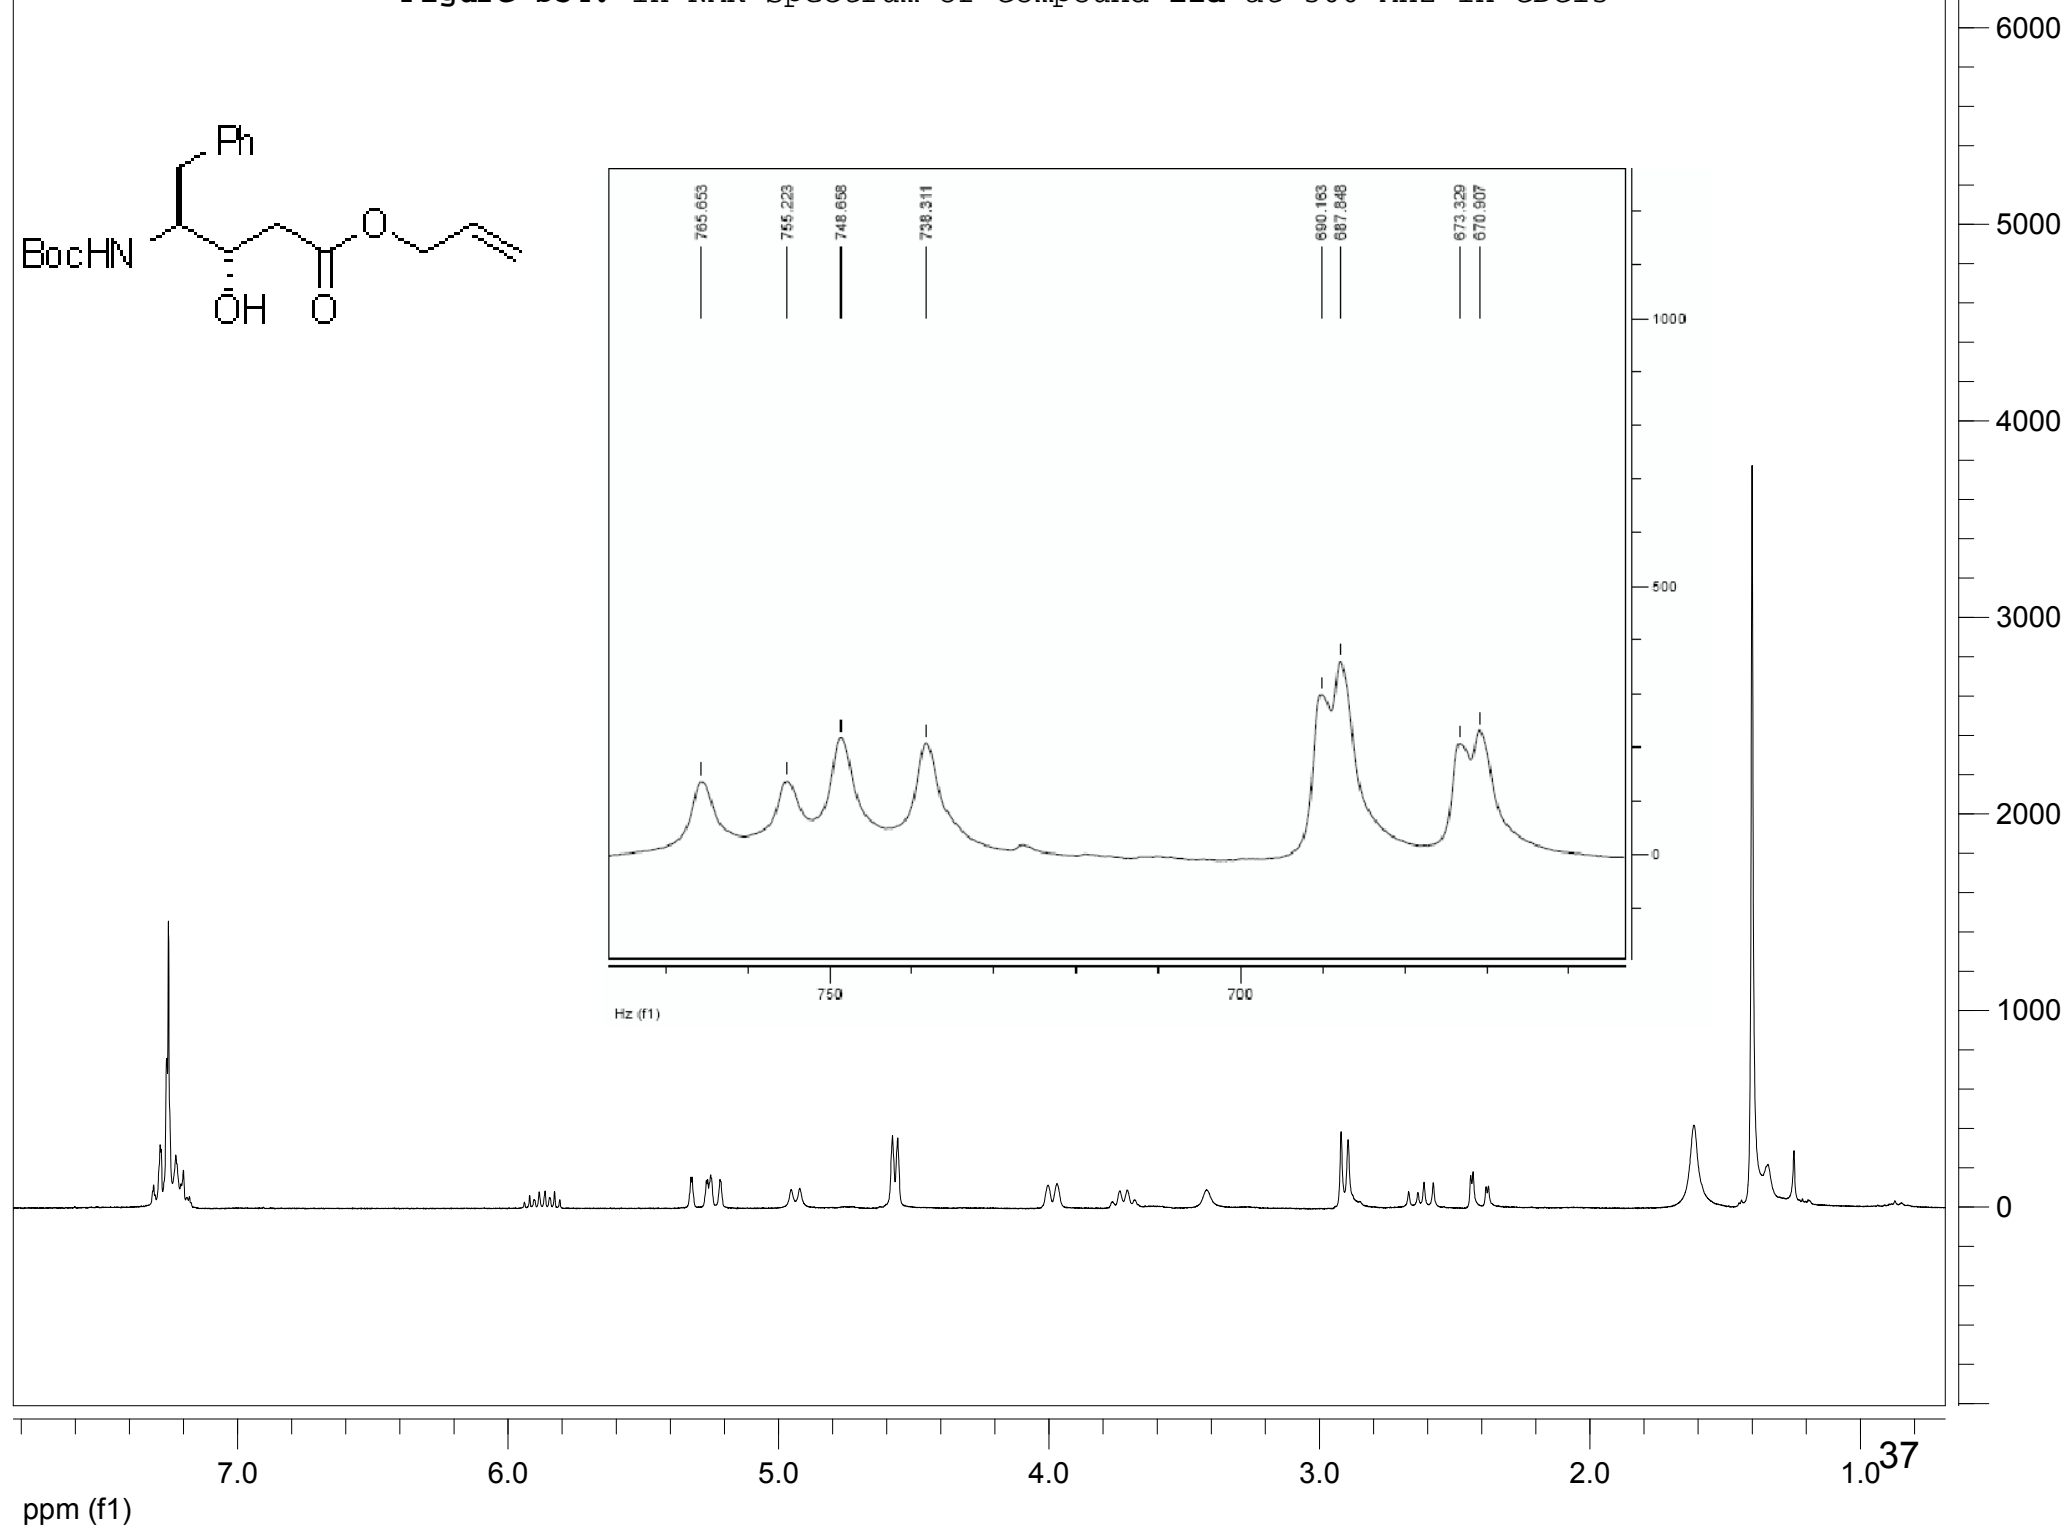

Figure S35. <sup>1</sup>H NMR Spectrum of Compound 12b at 300 MHz in CDCl<sub>3</sub>

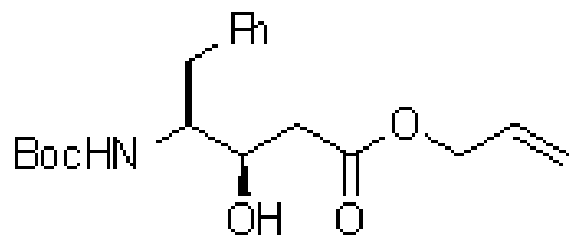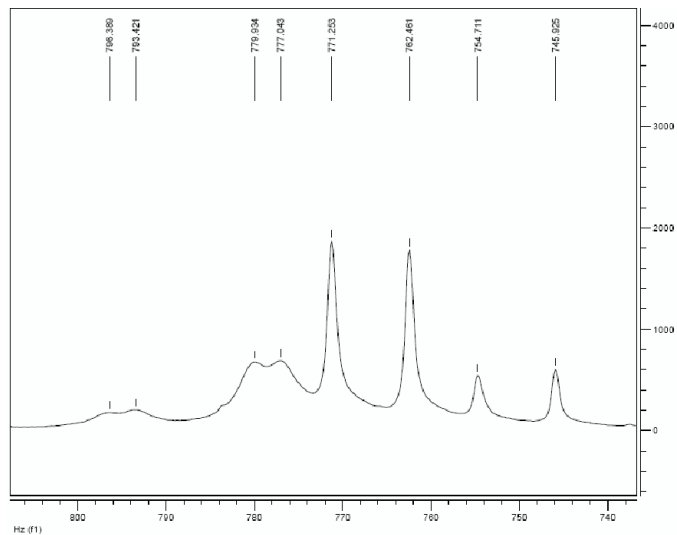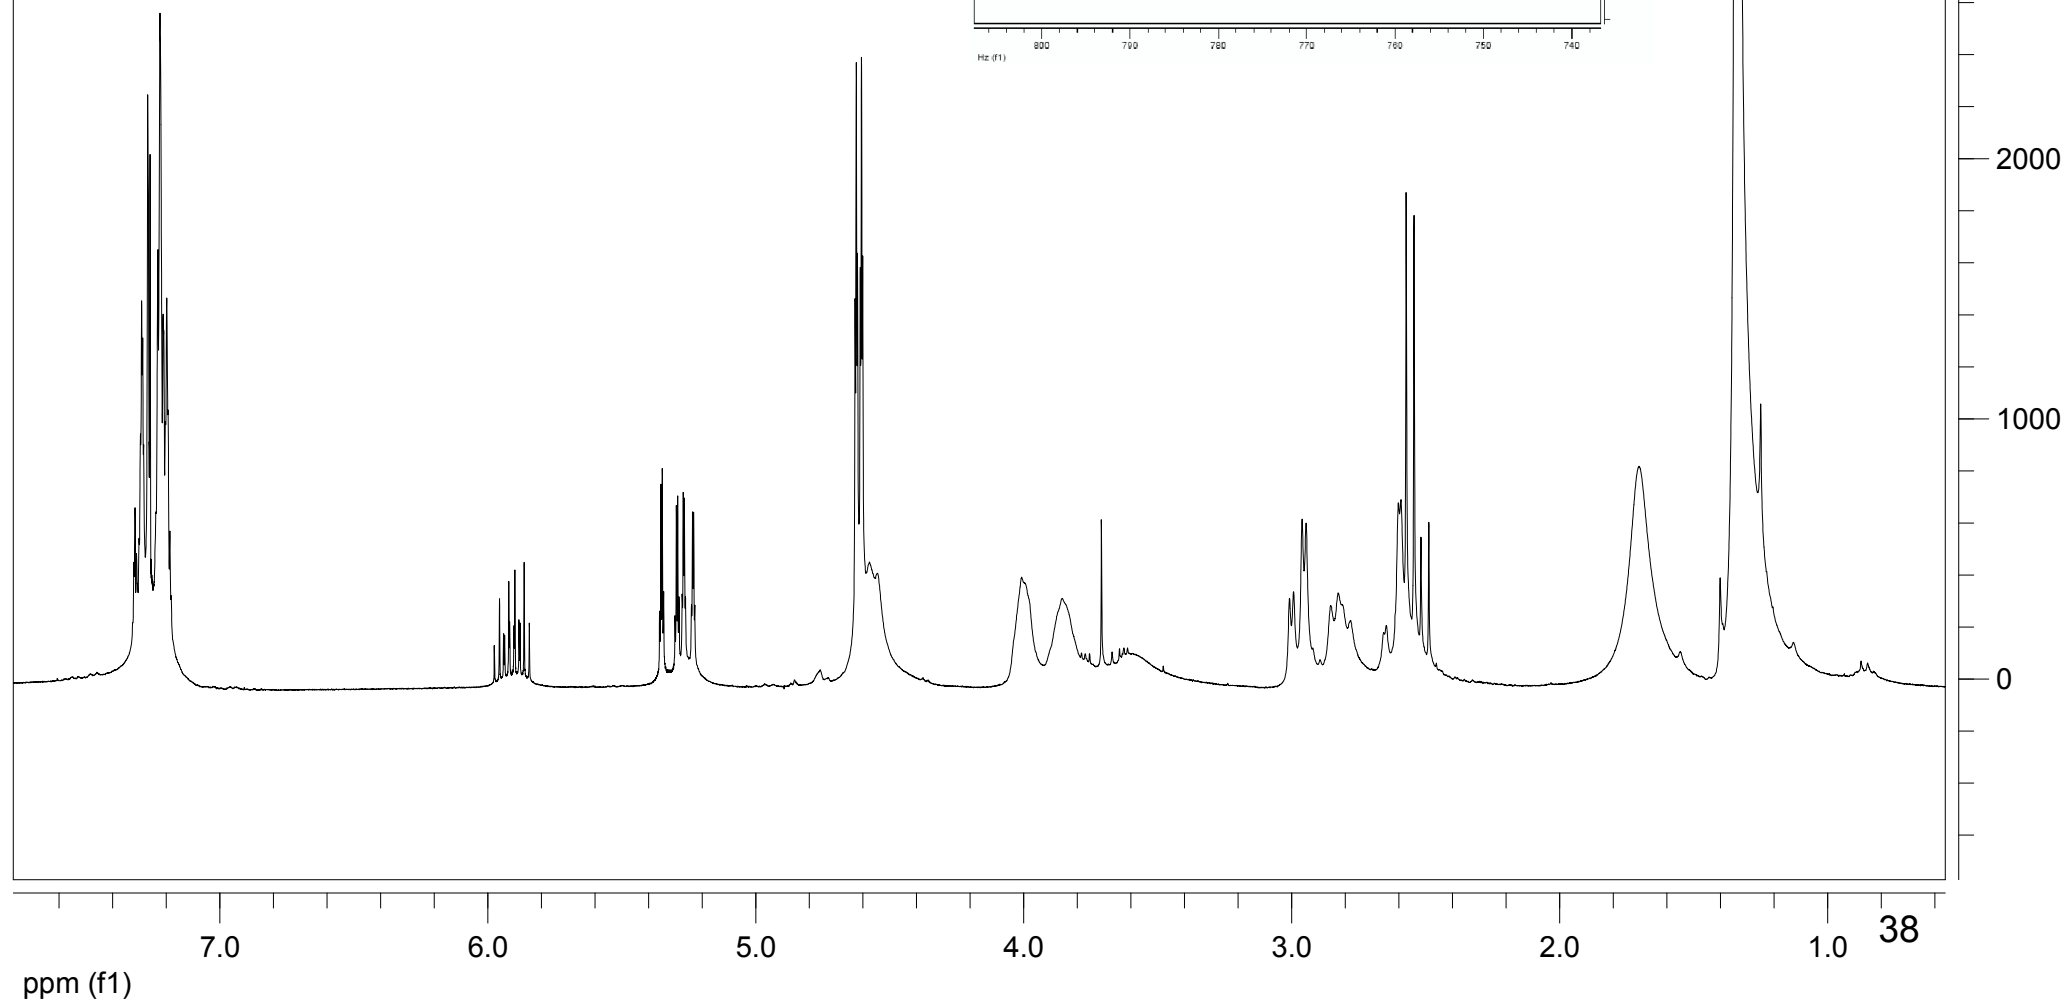

Figure S36. <sup>1</sup>H NMR Spectrum of Compound **12c** at 500 MHz in CDCl<sub>3</sub>

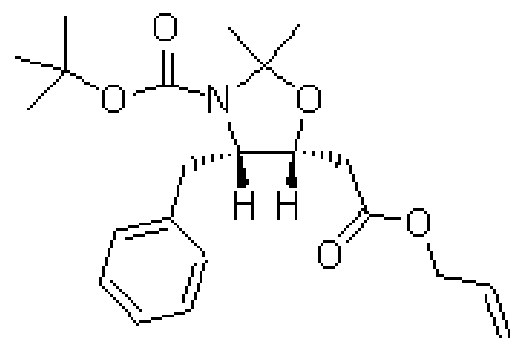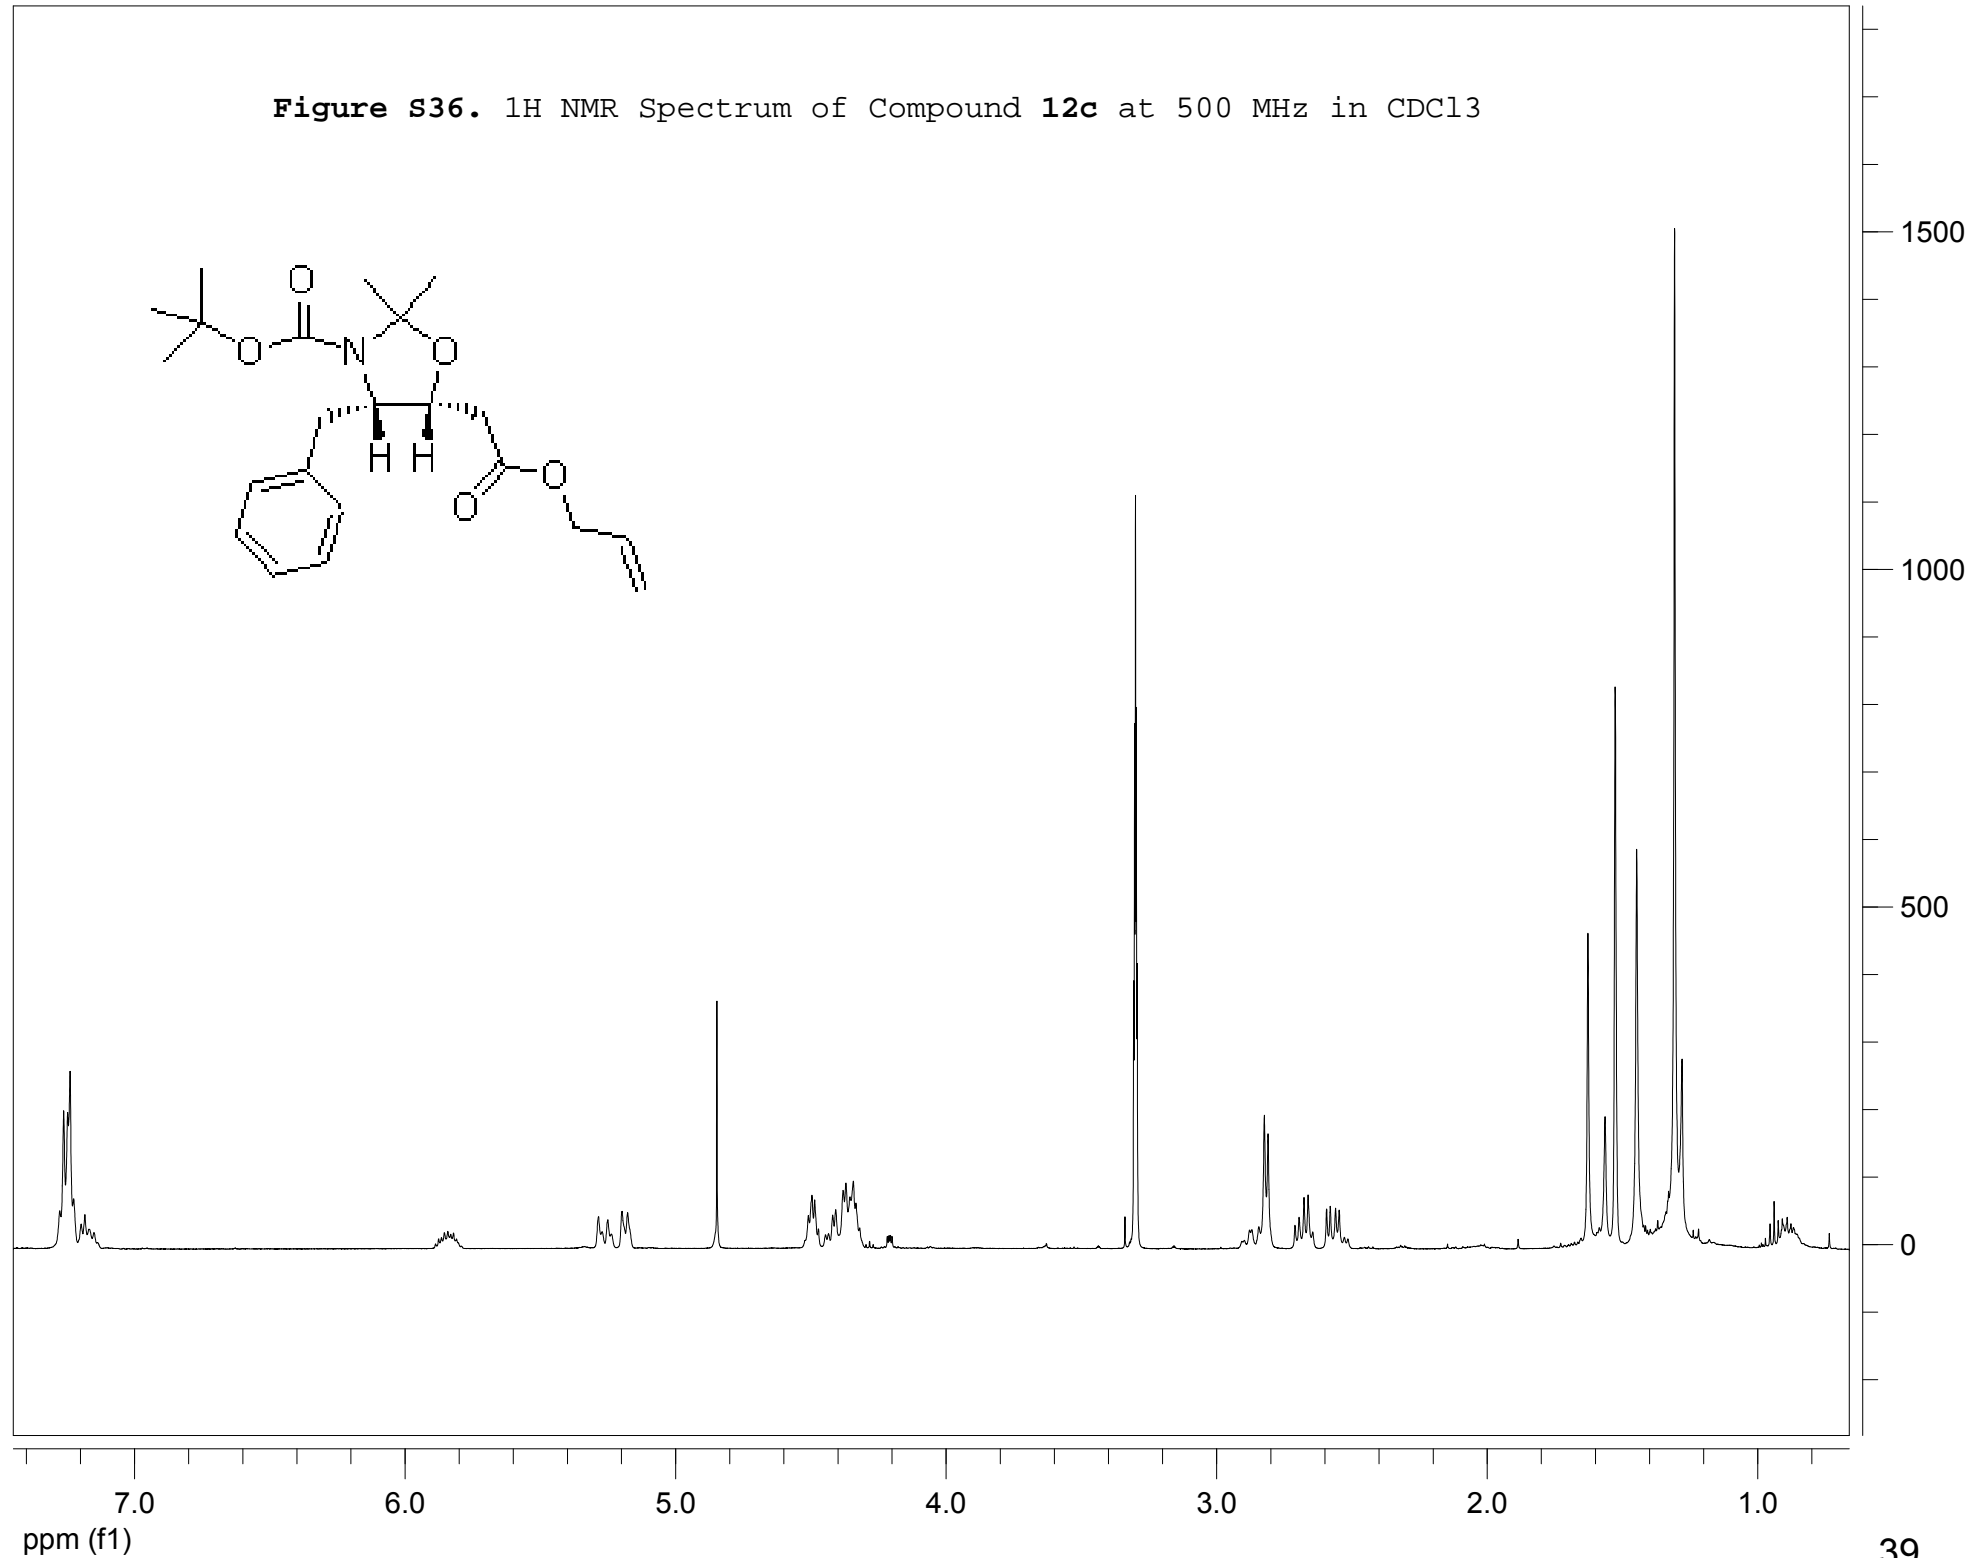

Figure S37. <sup>1</sup>H NMR Spectrum of Compound **12d** at 500 MHz in CDCl<sub>3</sub> at 0°C

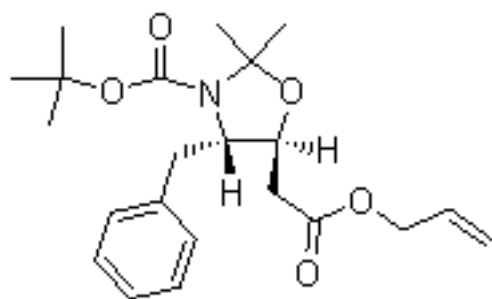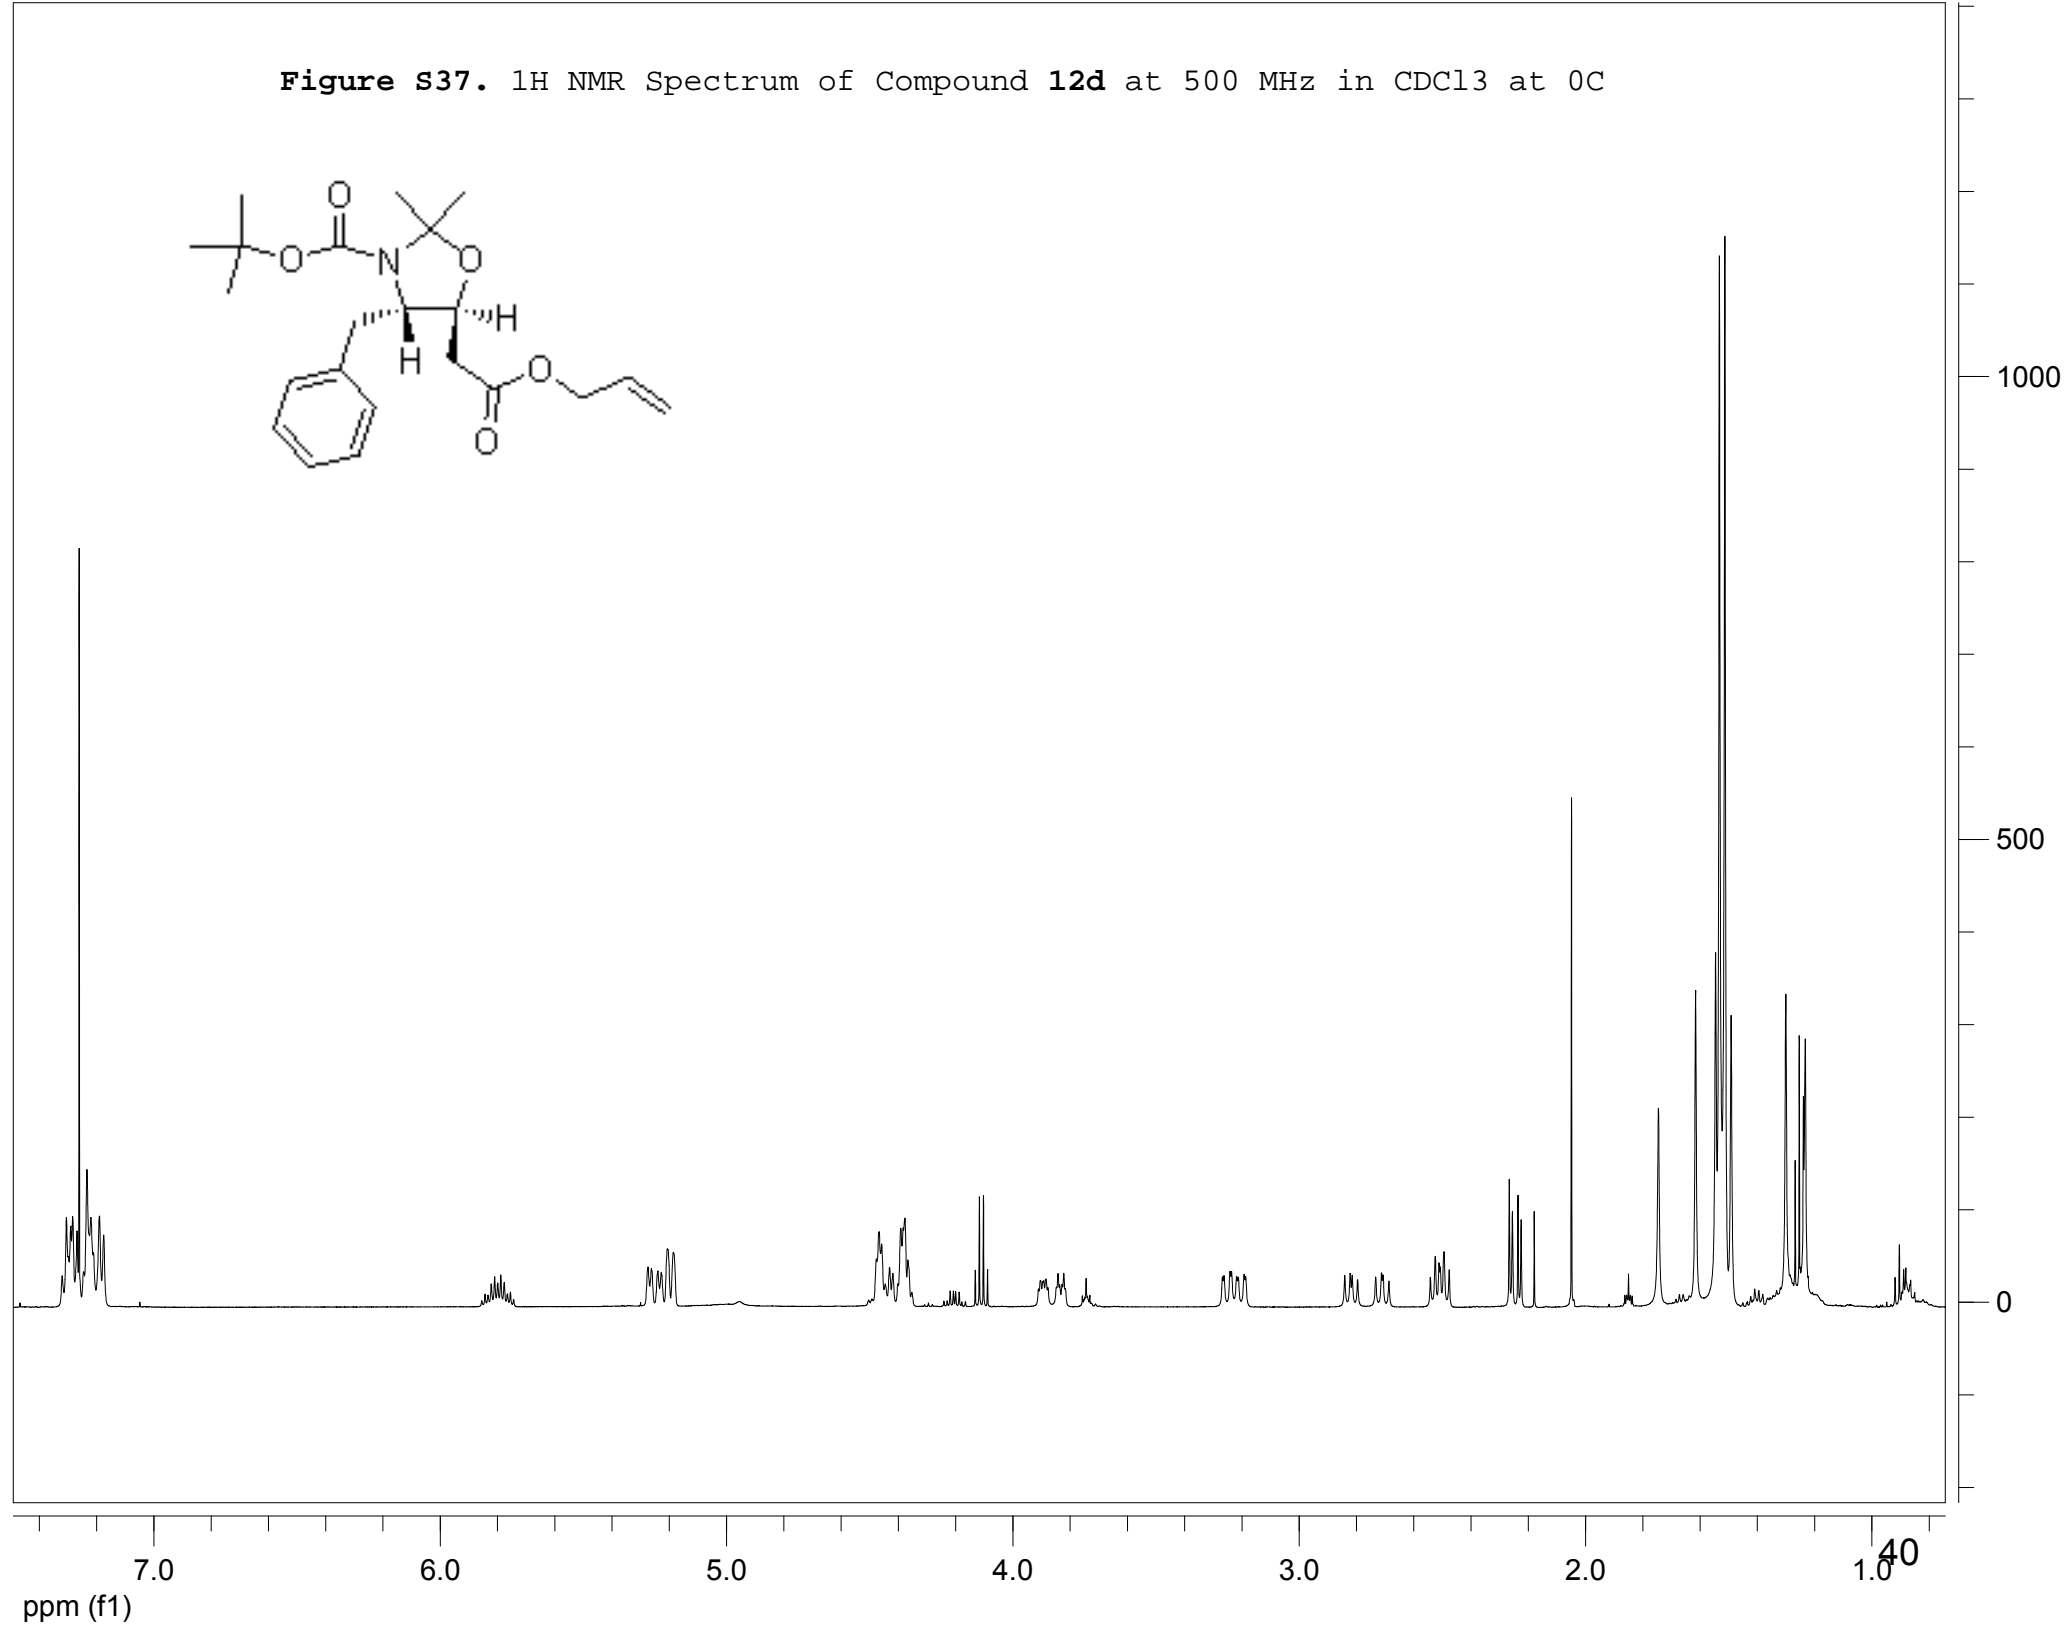



Figure S38. <sup>1</sup>H NMR Spectrum of Compound 13a at 300 MHz in CDCl<sub>3</sub>

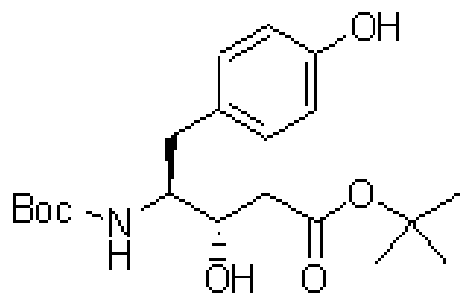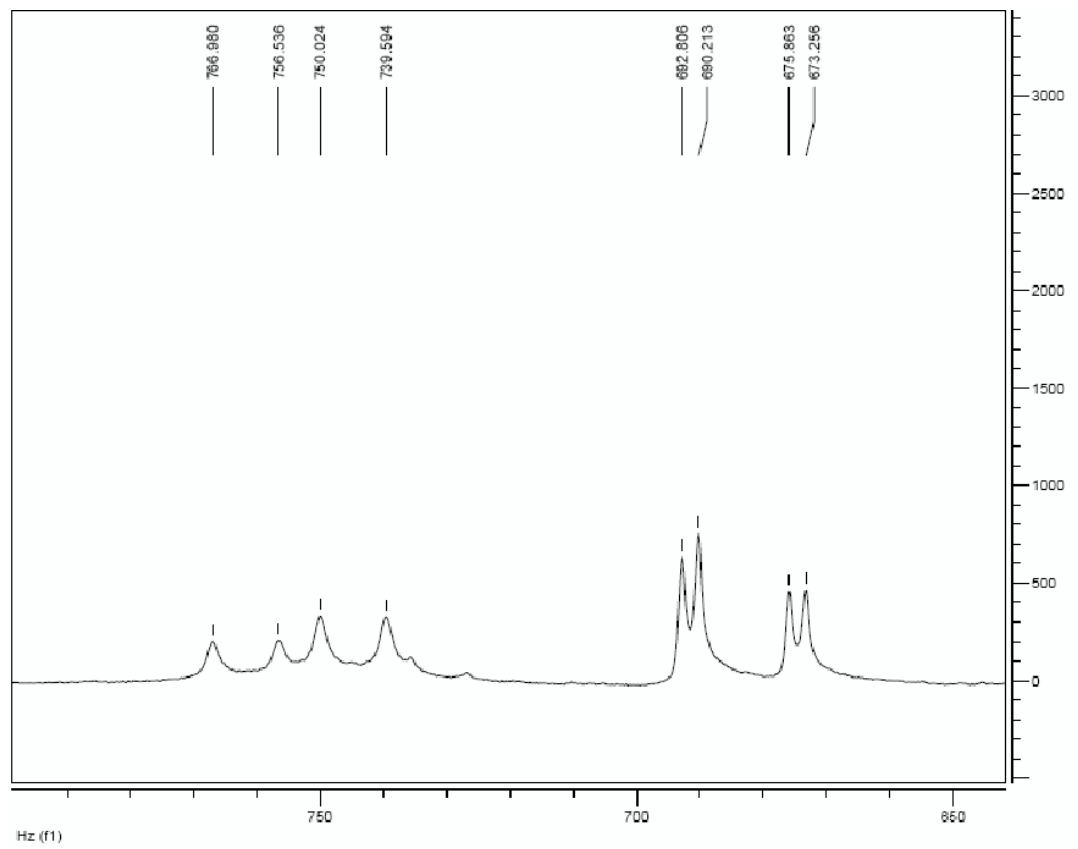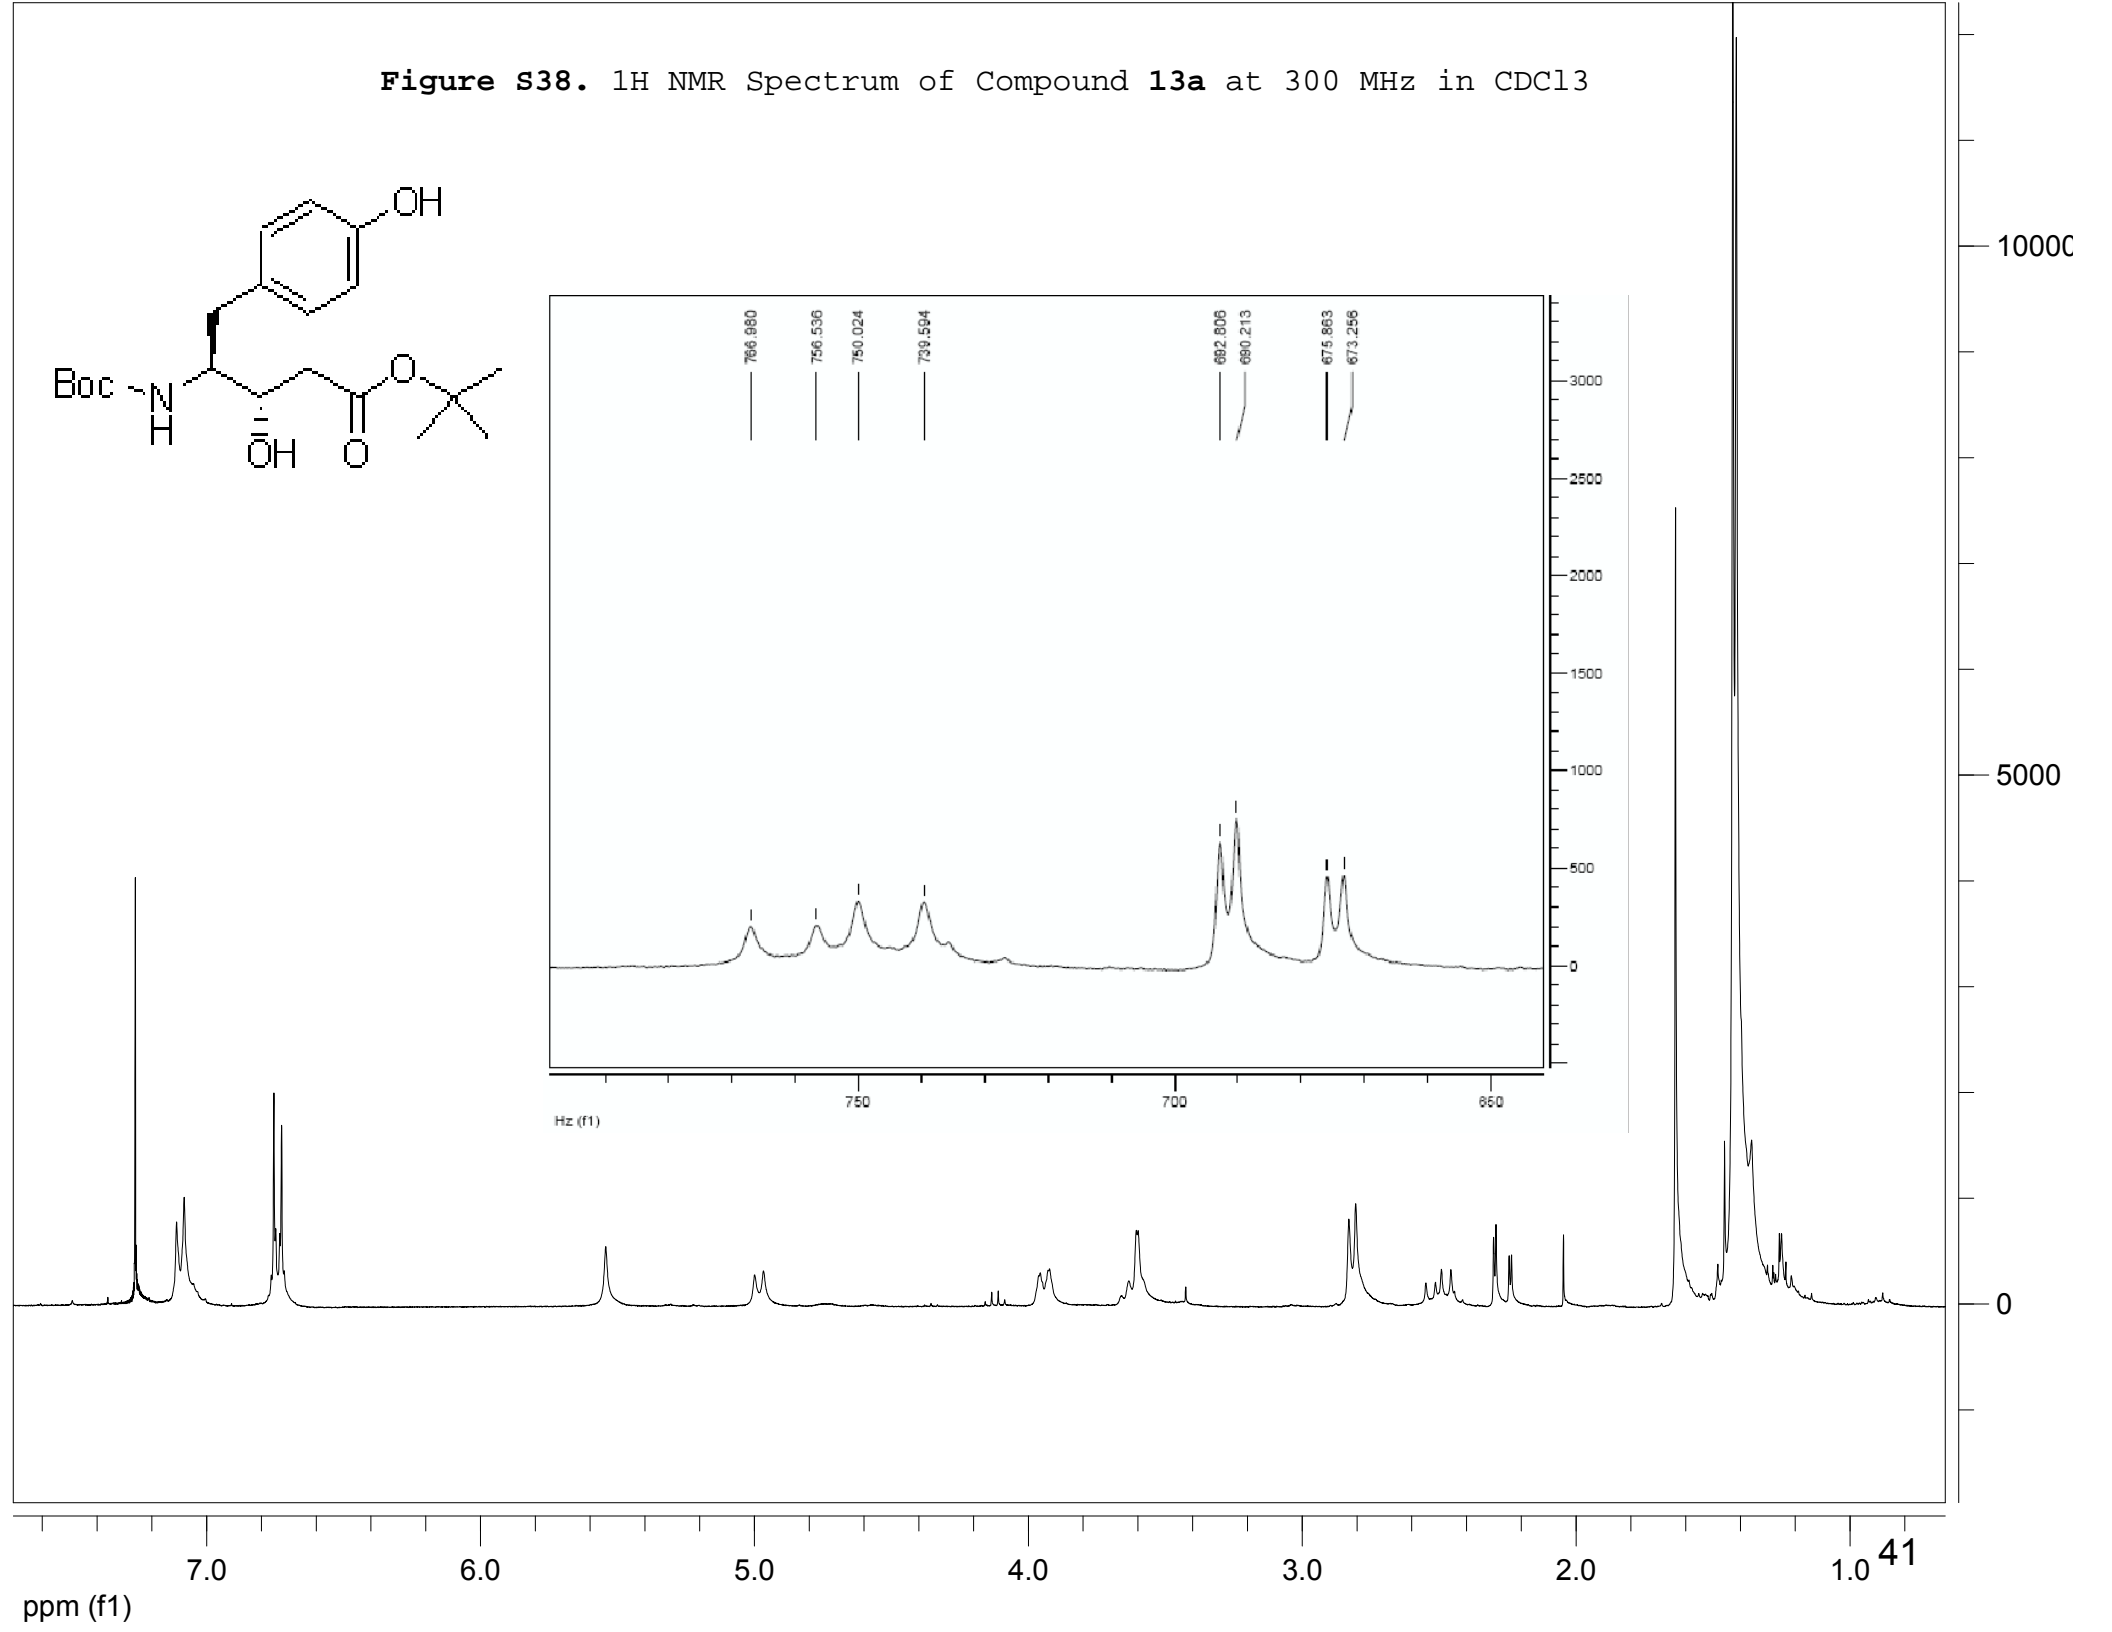

Figure S39. <sup>1</sup>H NMR Spectrum of Compound **13b** at 300 MHz in CDCl<sub>3</sub>

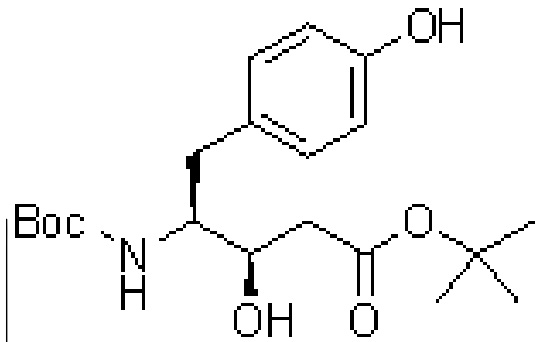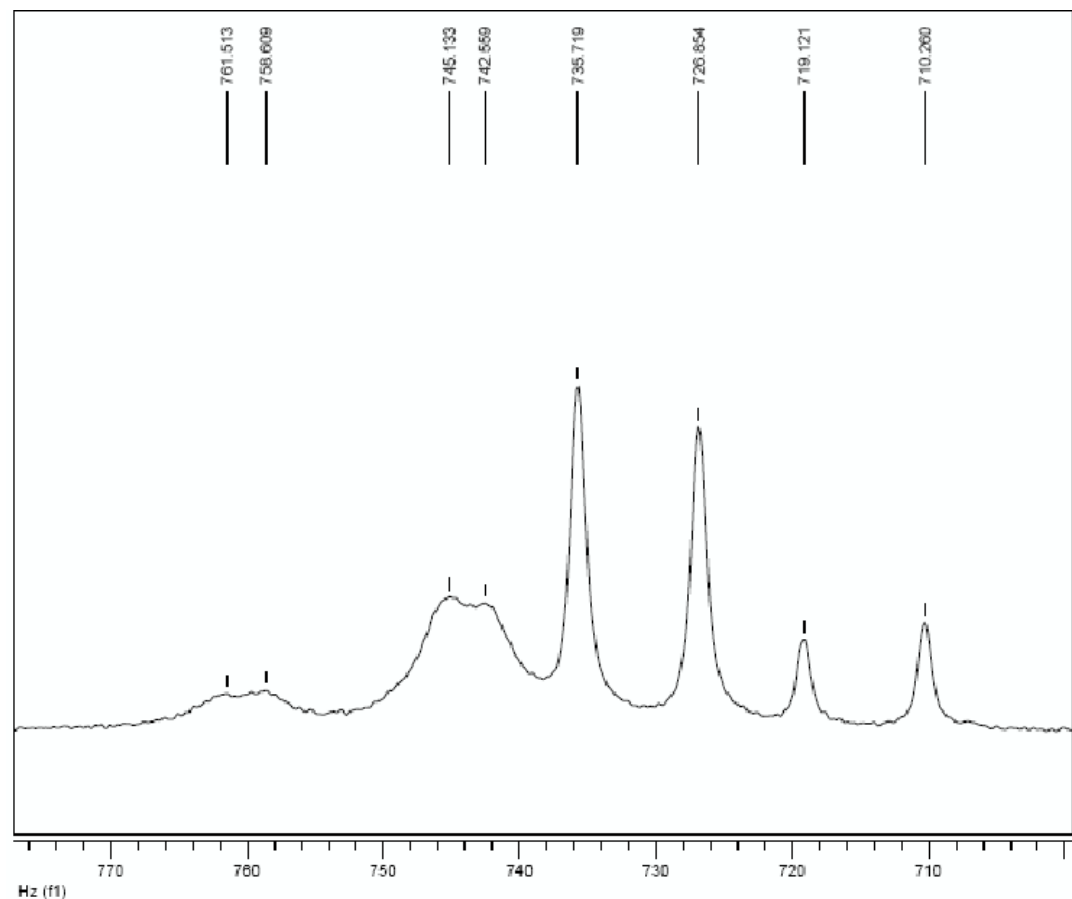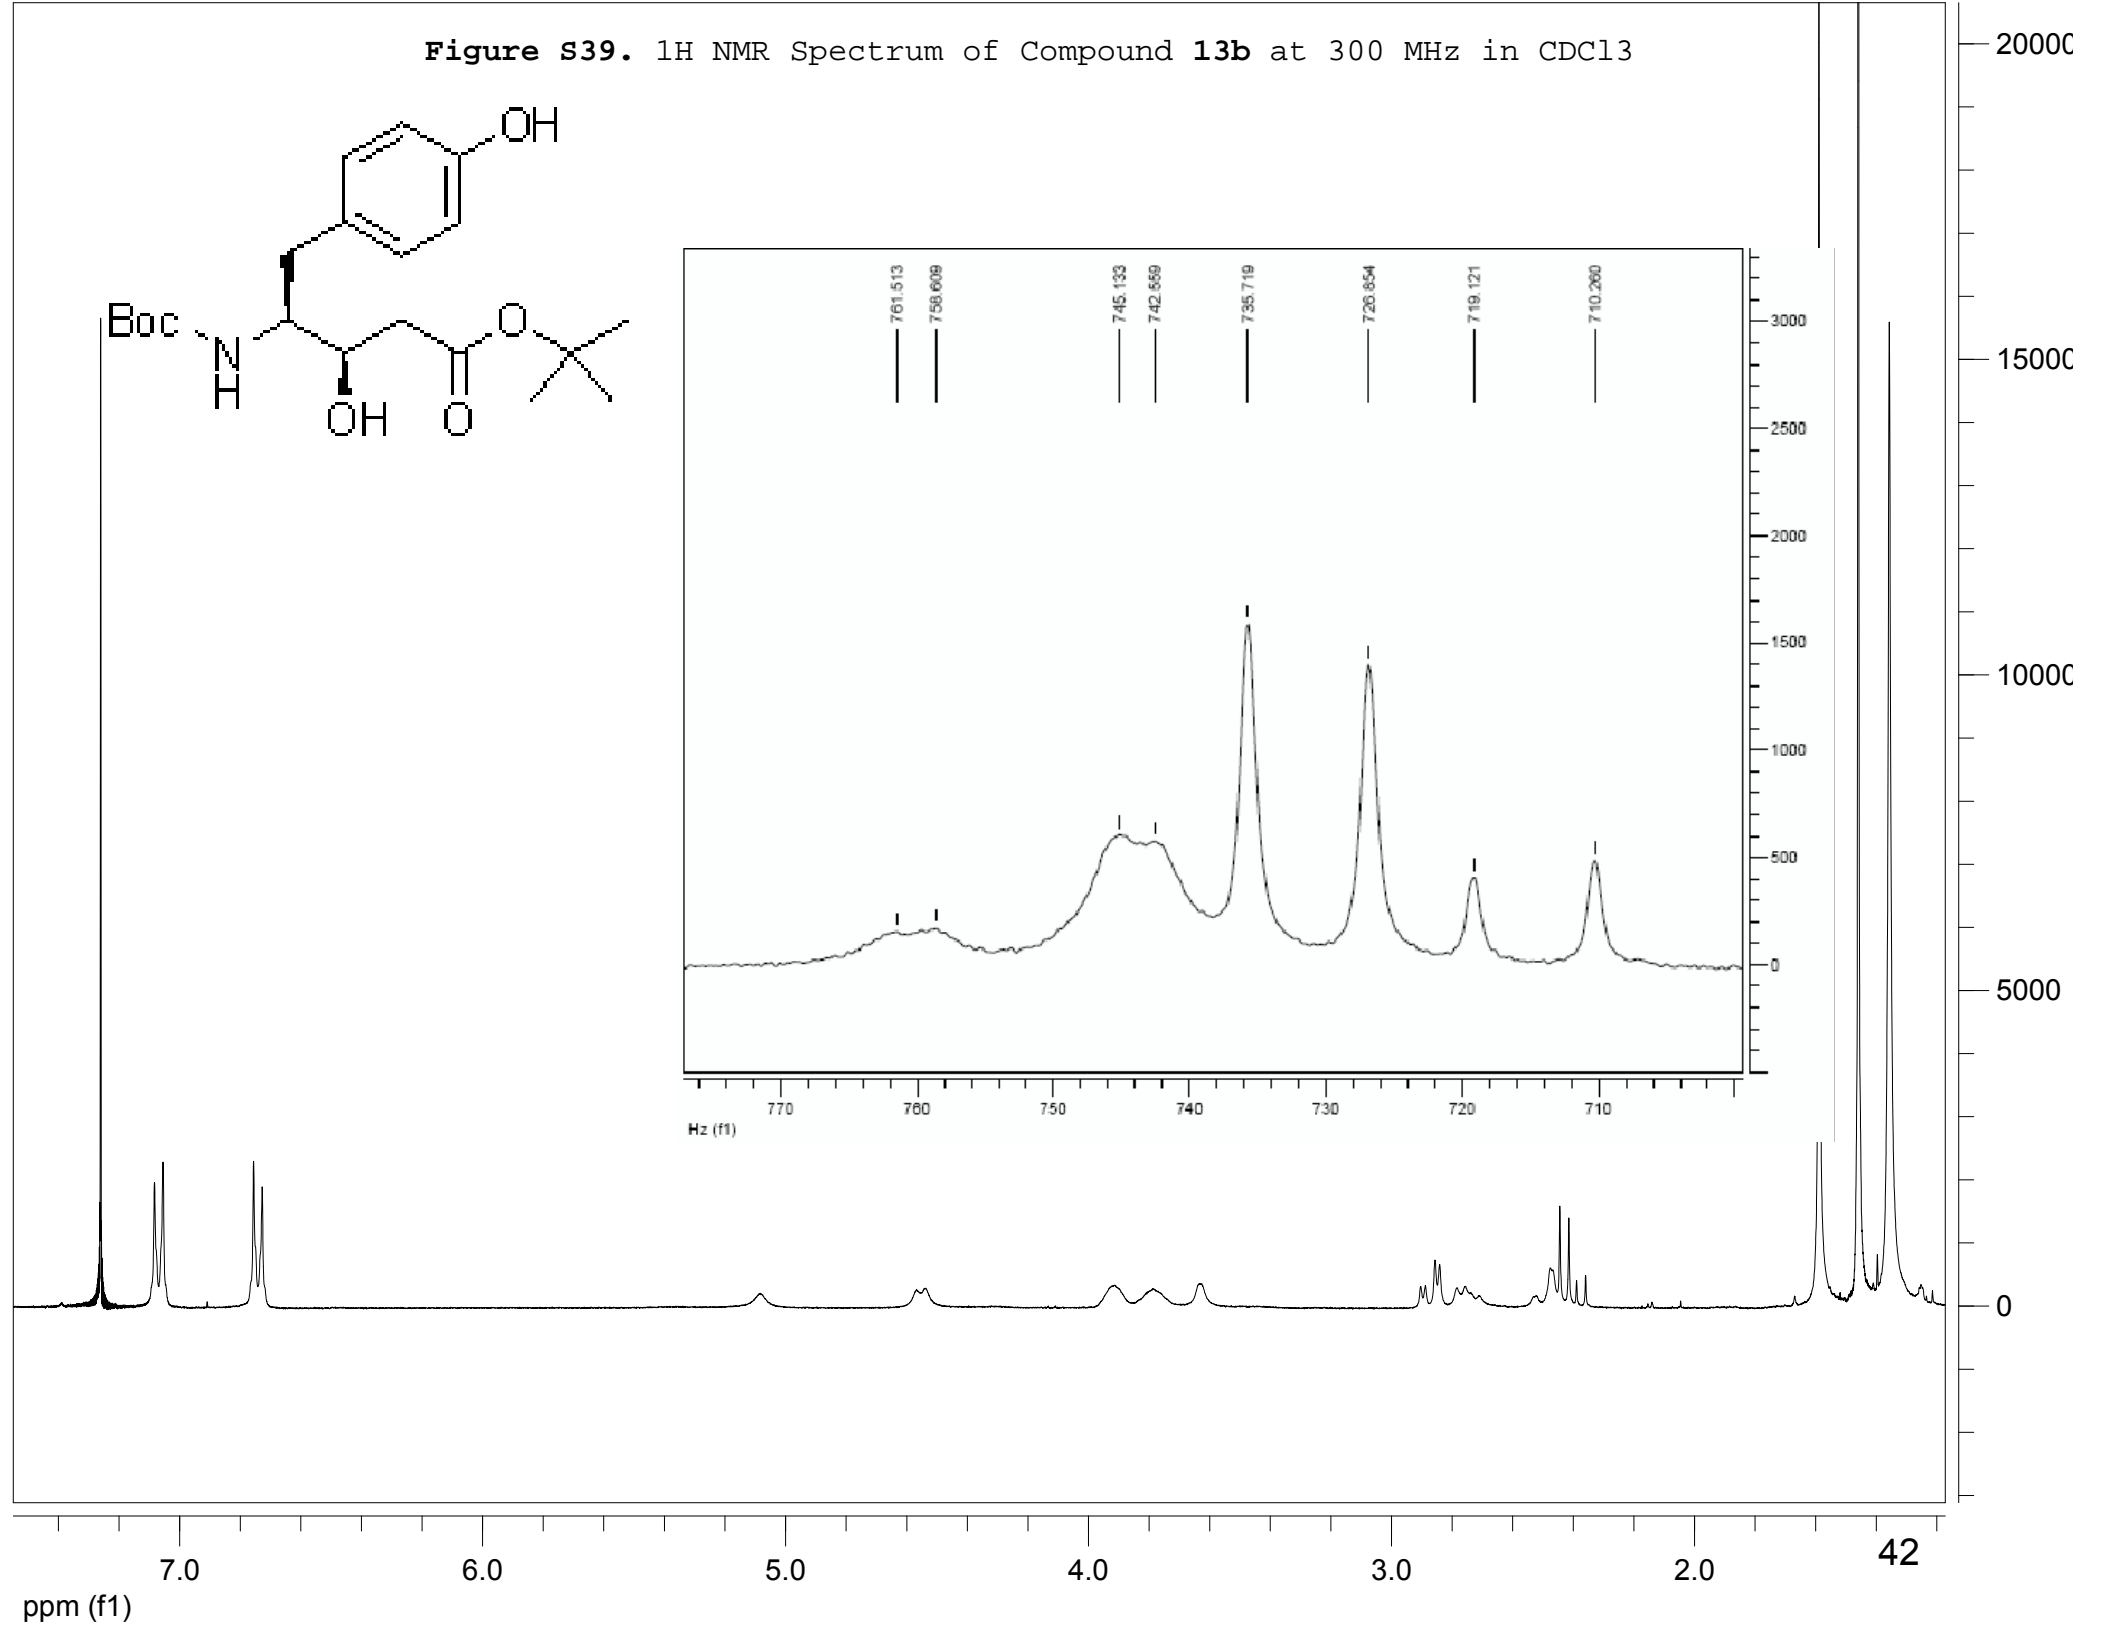

Figure S40. <sup>1</sup>H NMR Spectrum of Compound **14a** at 300 MHz in CDCl<sub>3</sub>

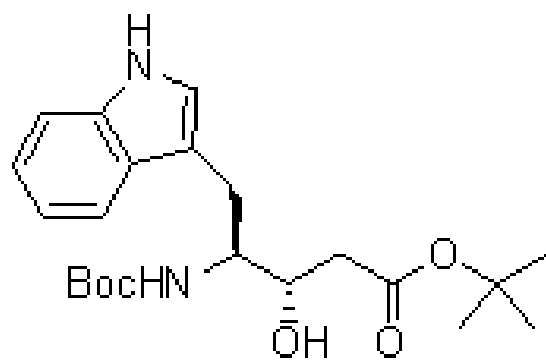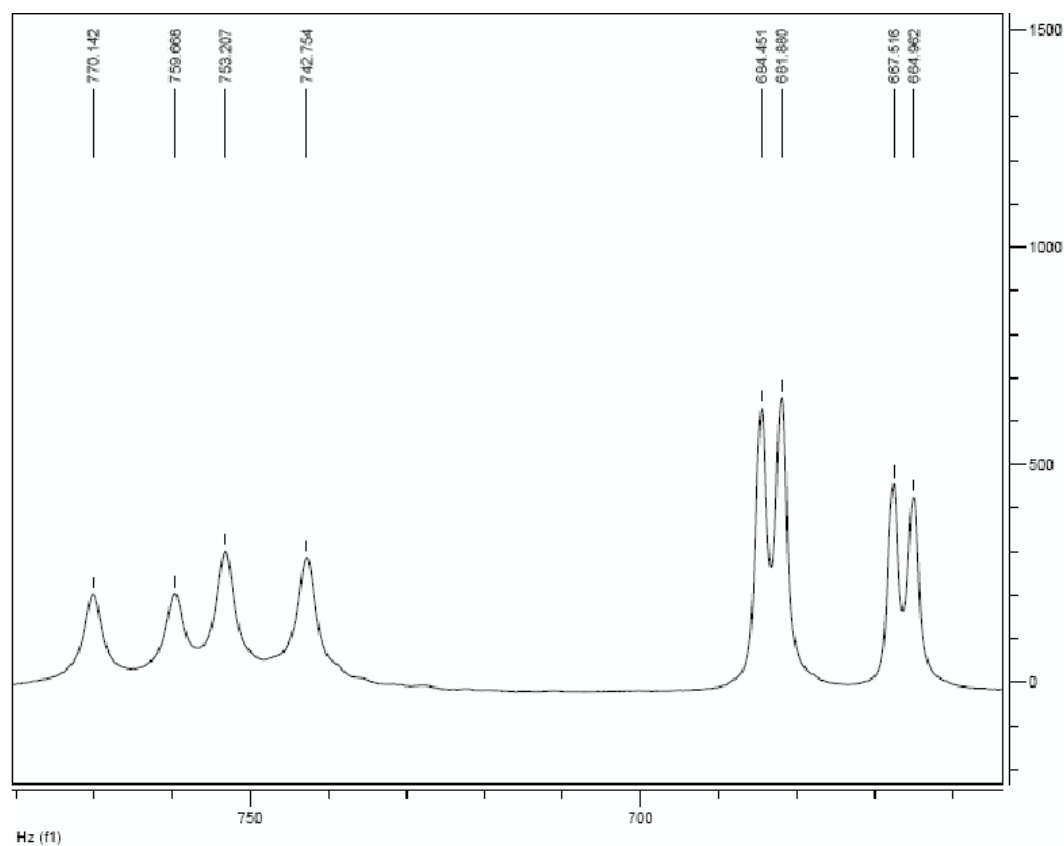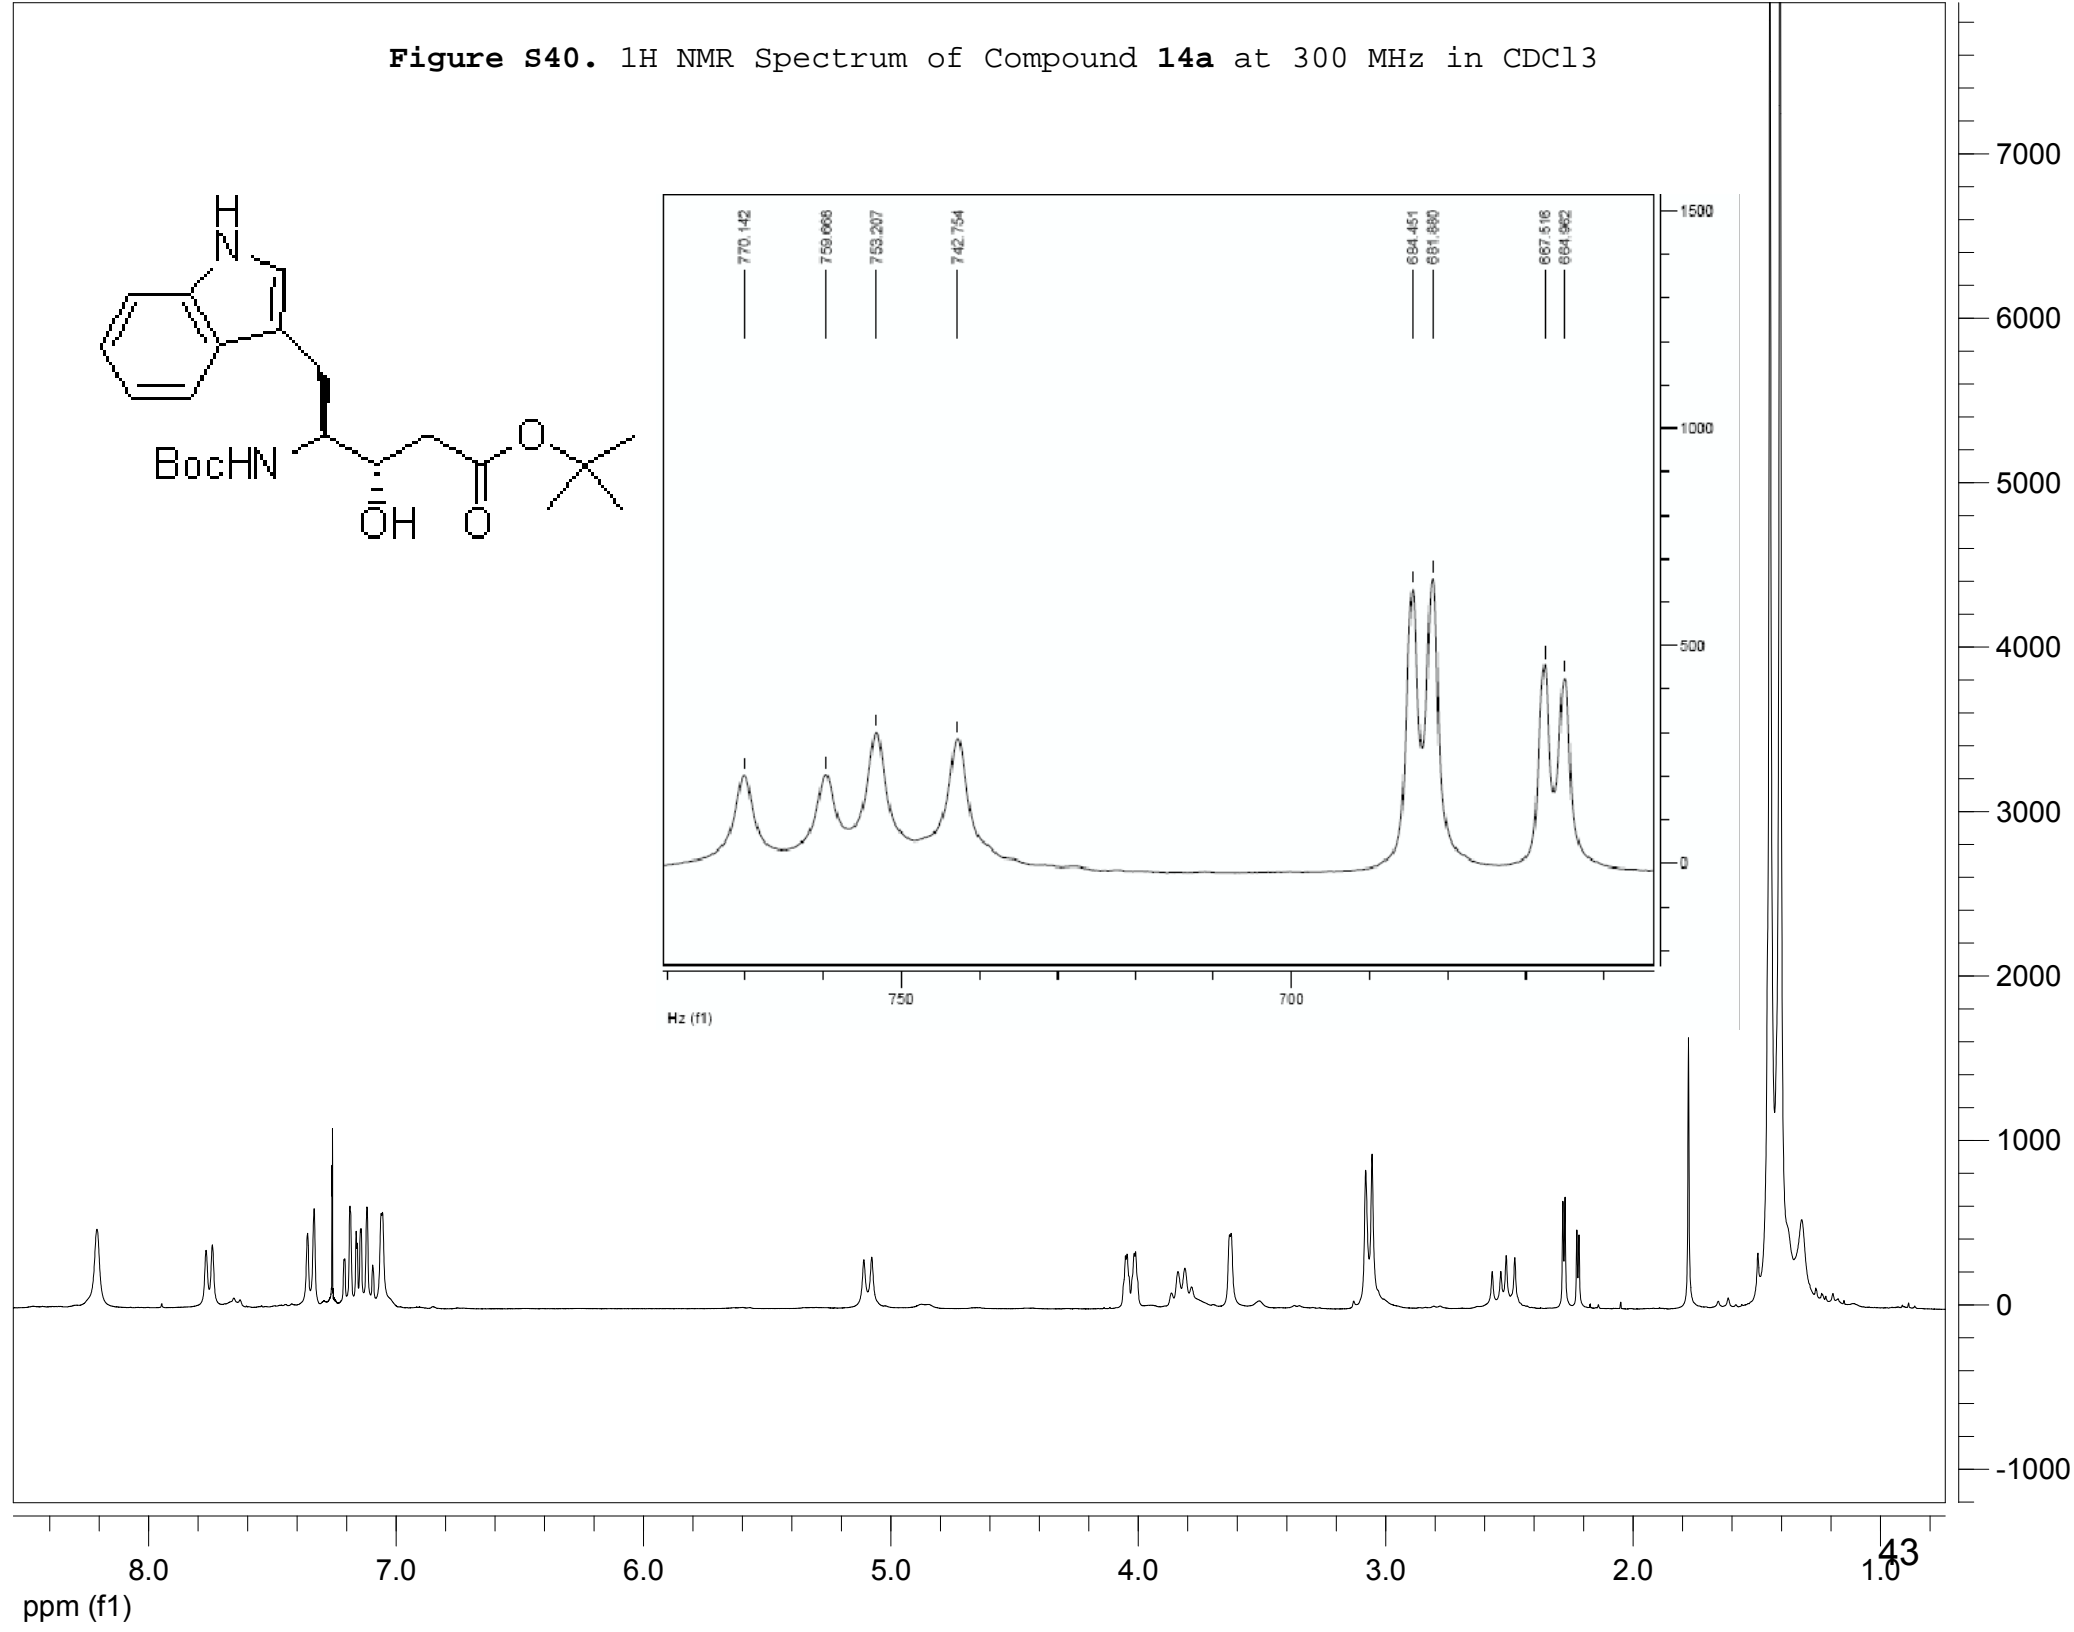

Figure S41. <sup>1</sup>H NMR Spectrum of Compound **14b** at 300 MHz in CDCl<sub>3</sub>

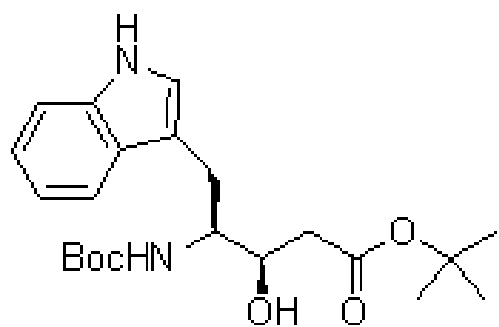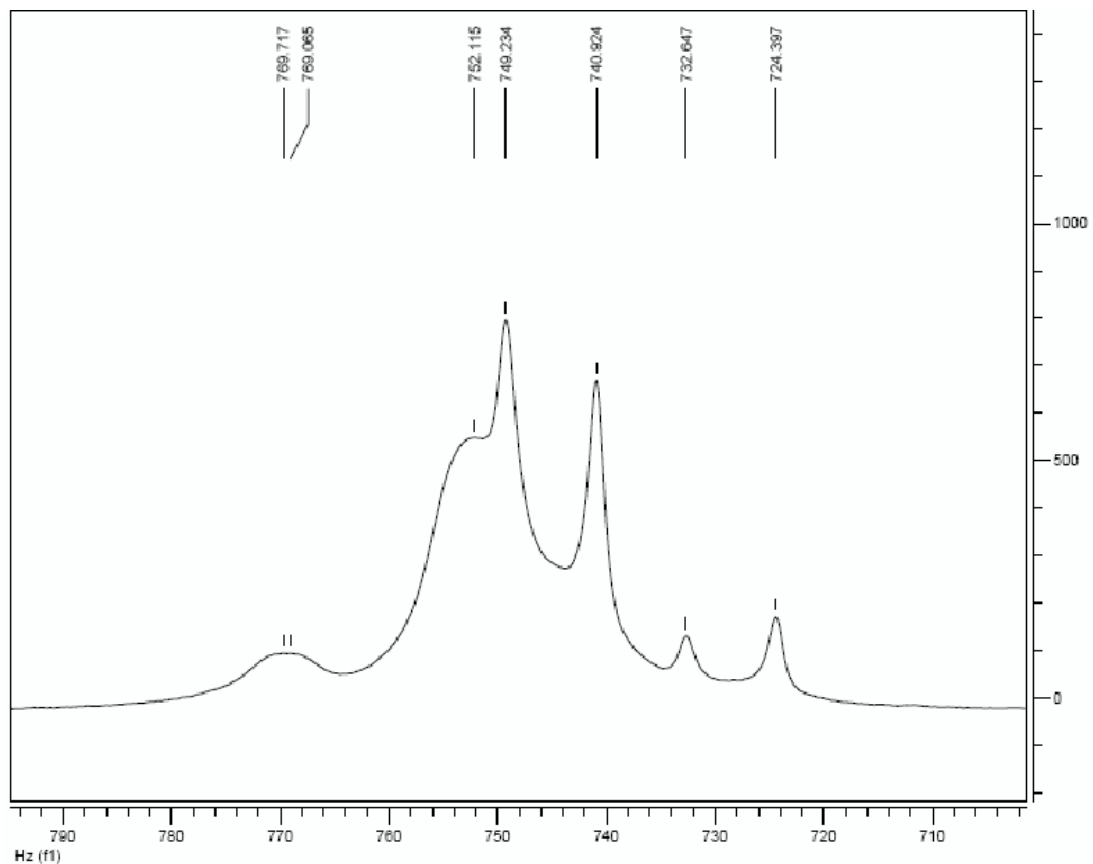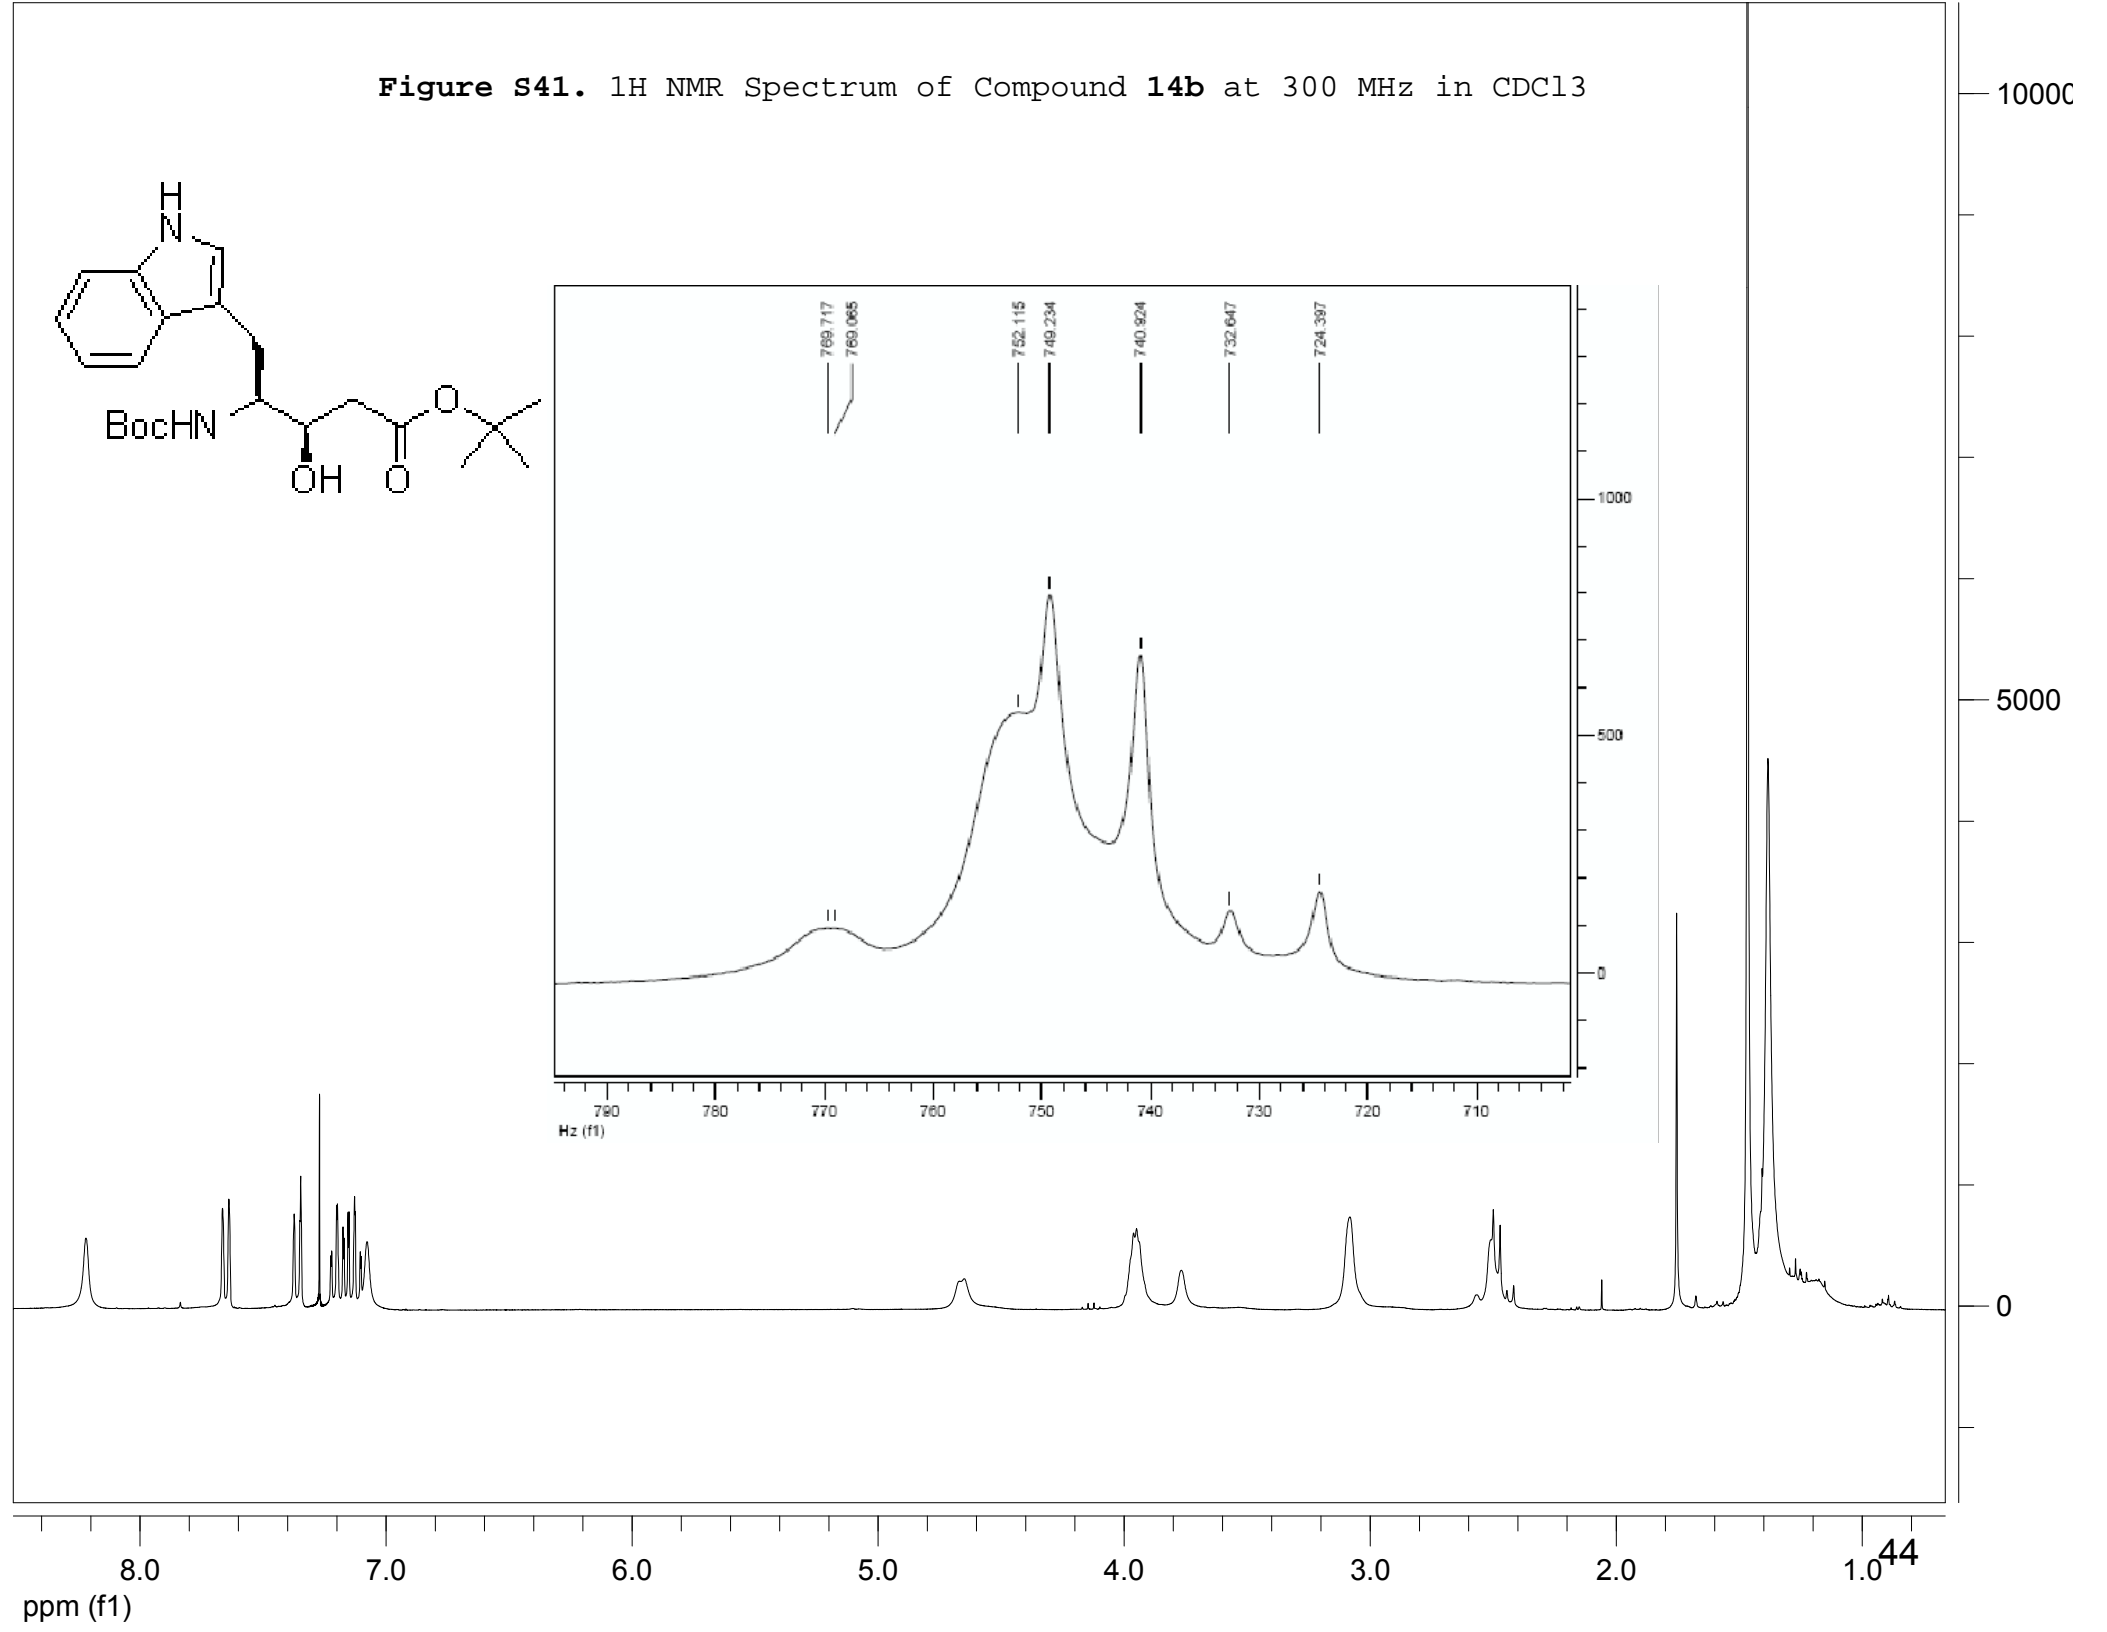

Figure S42. <sup>1</sup>H NMR Spectrum of Compound 15a at 300 MHz in CDCl<sub>3</sub>

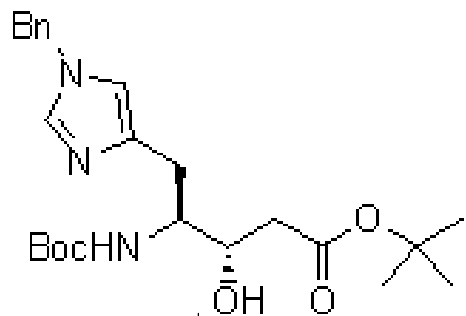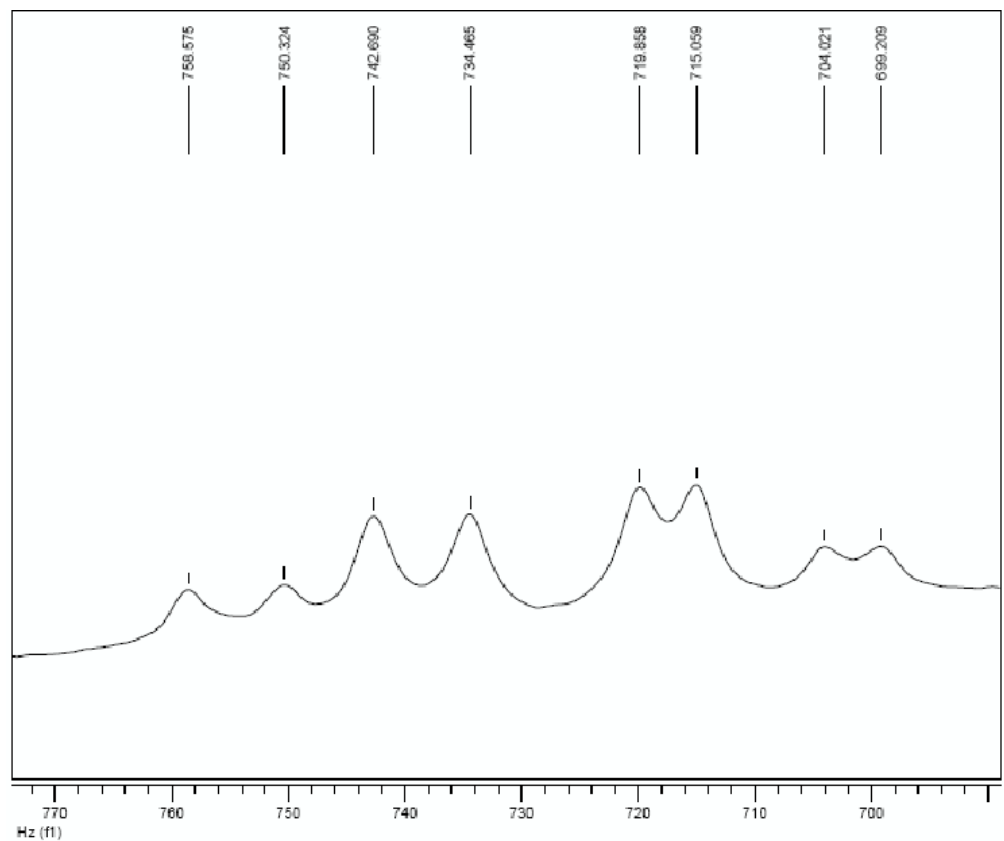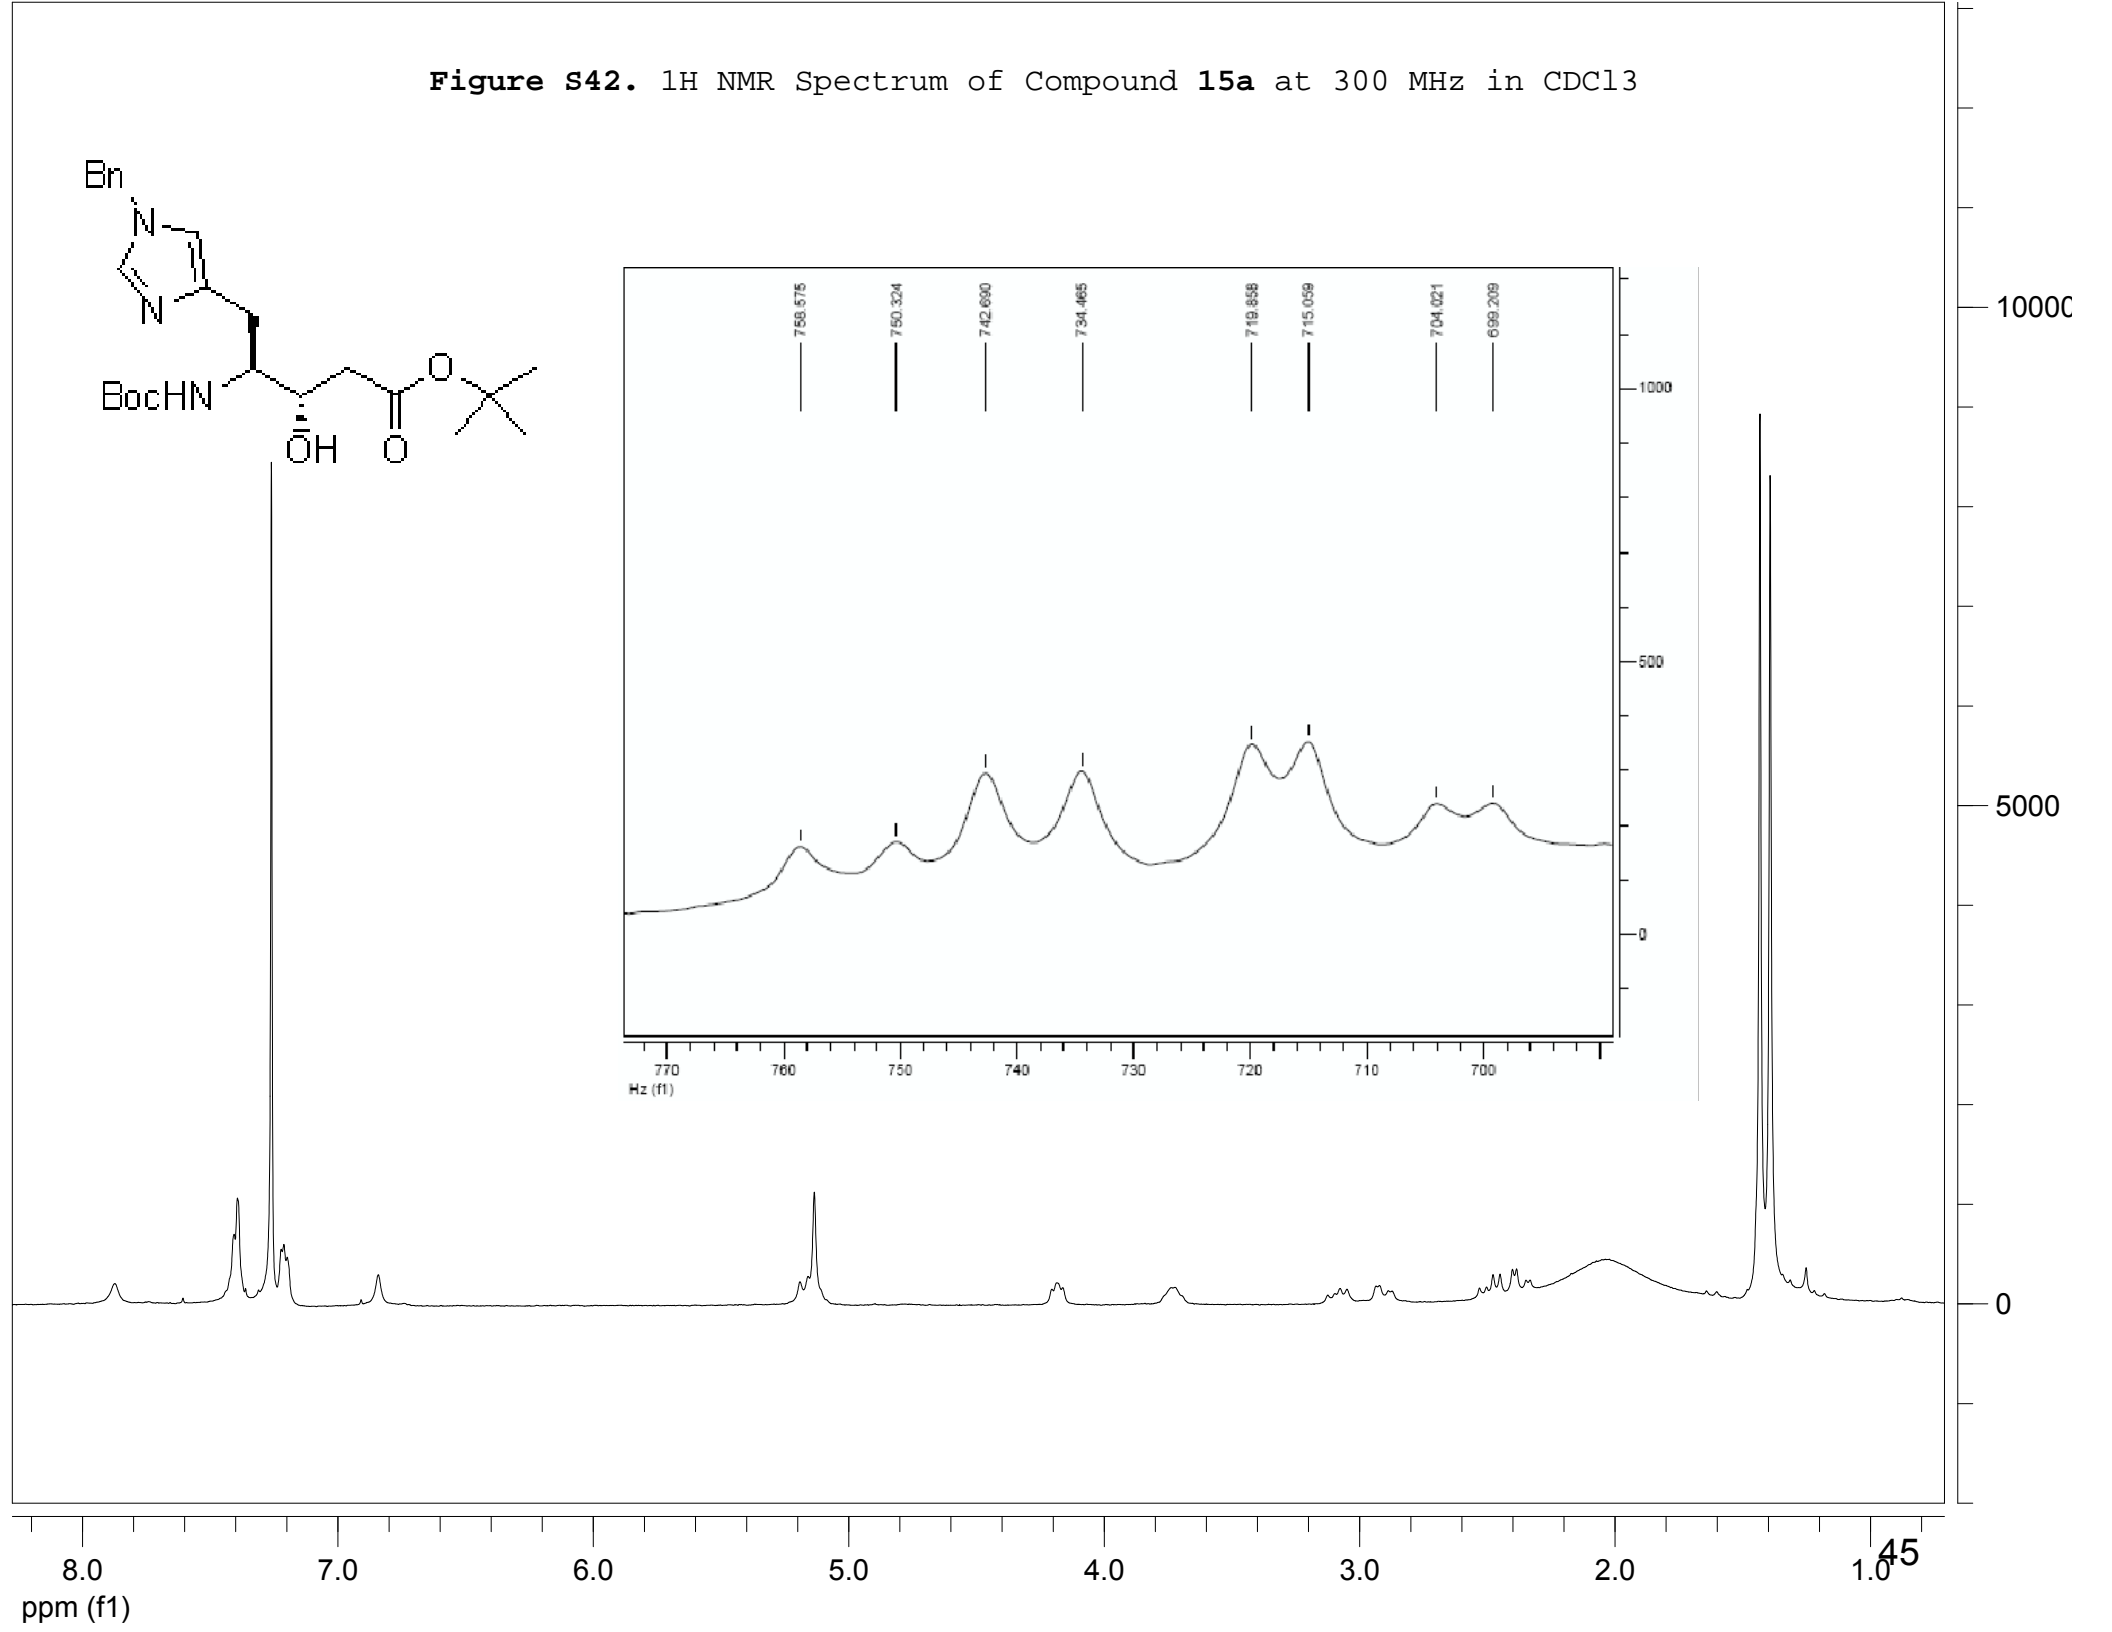

Figure S43. <sup>1</sup>H NMR Spectrum of Compound **15b** at 300 MHz in CDCl<sub>3</sub>

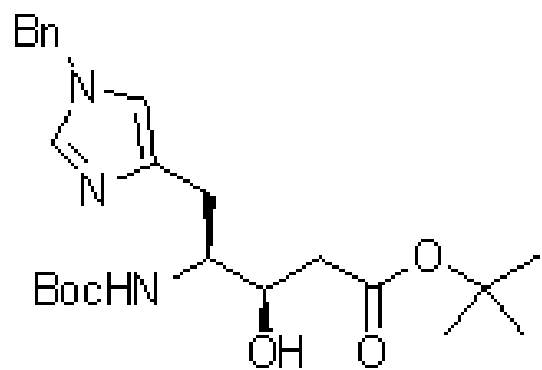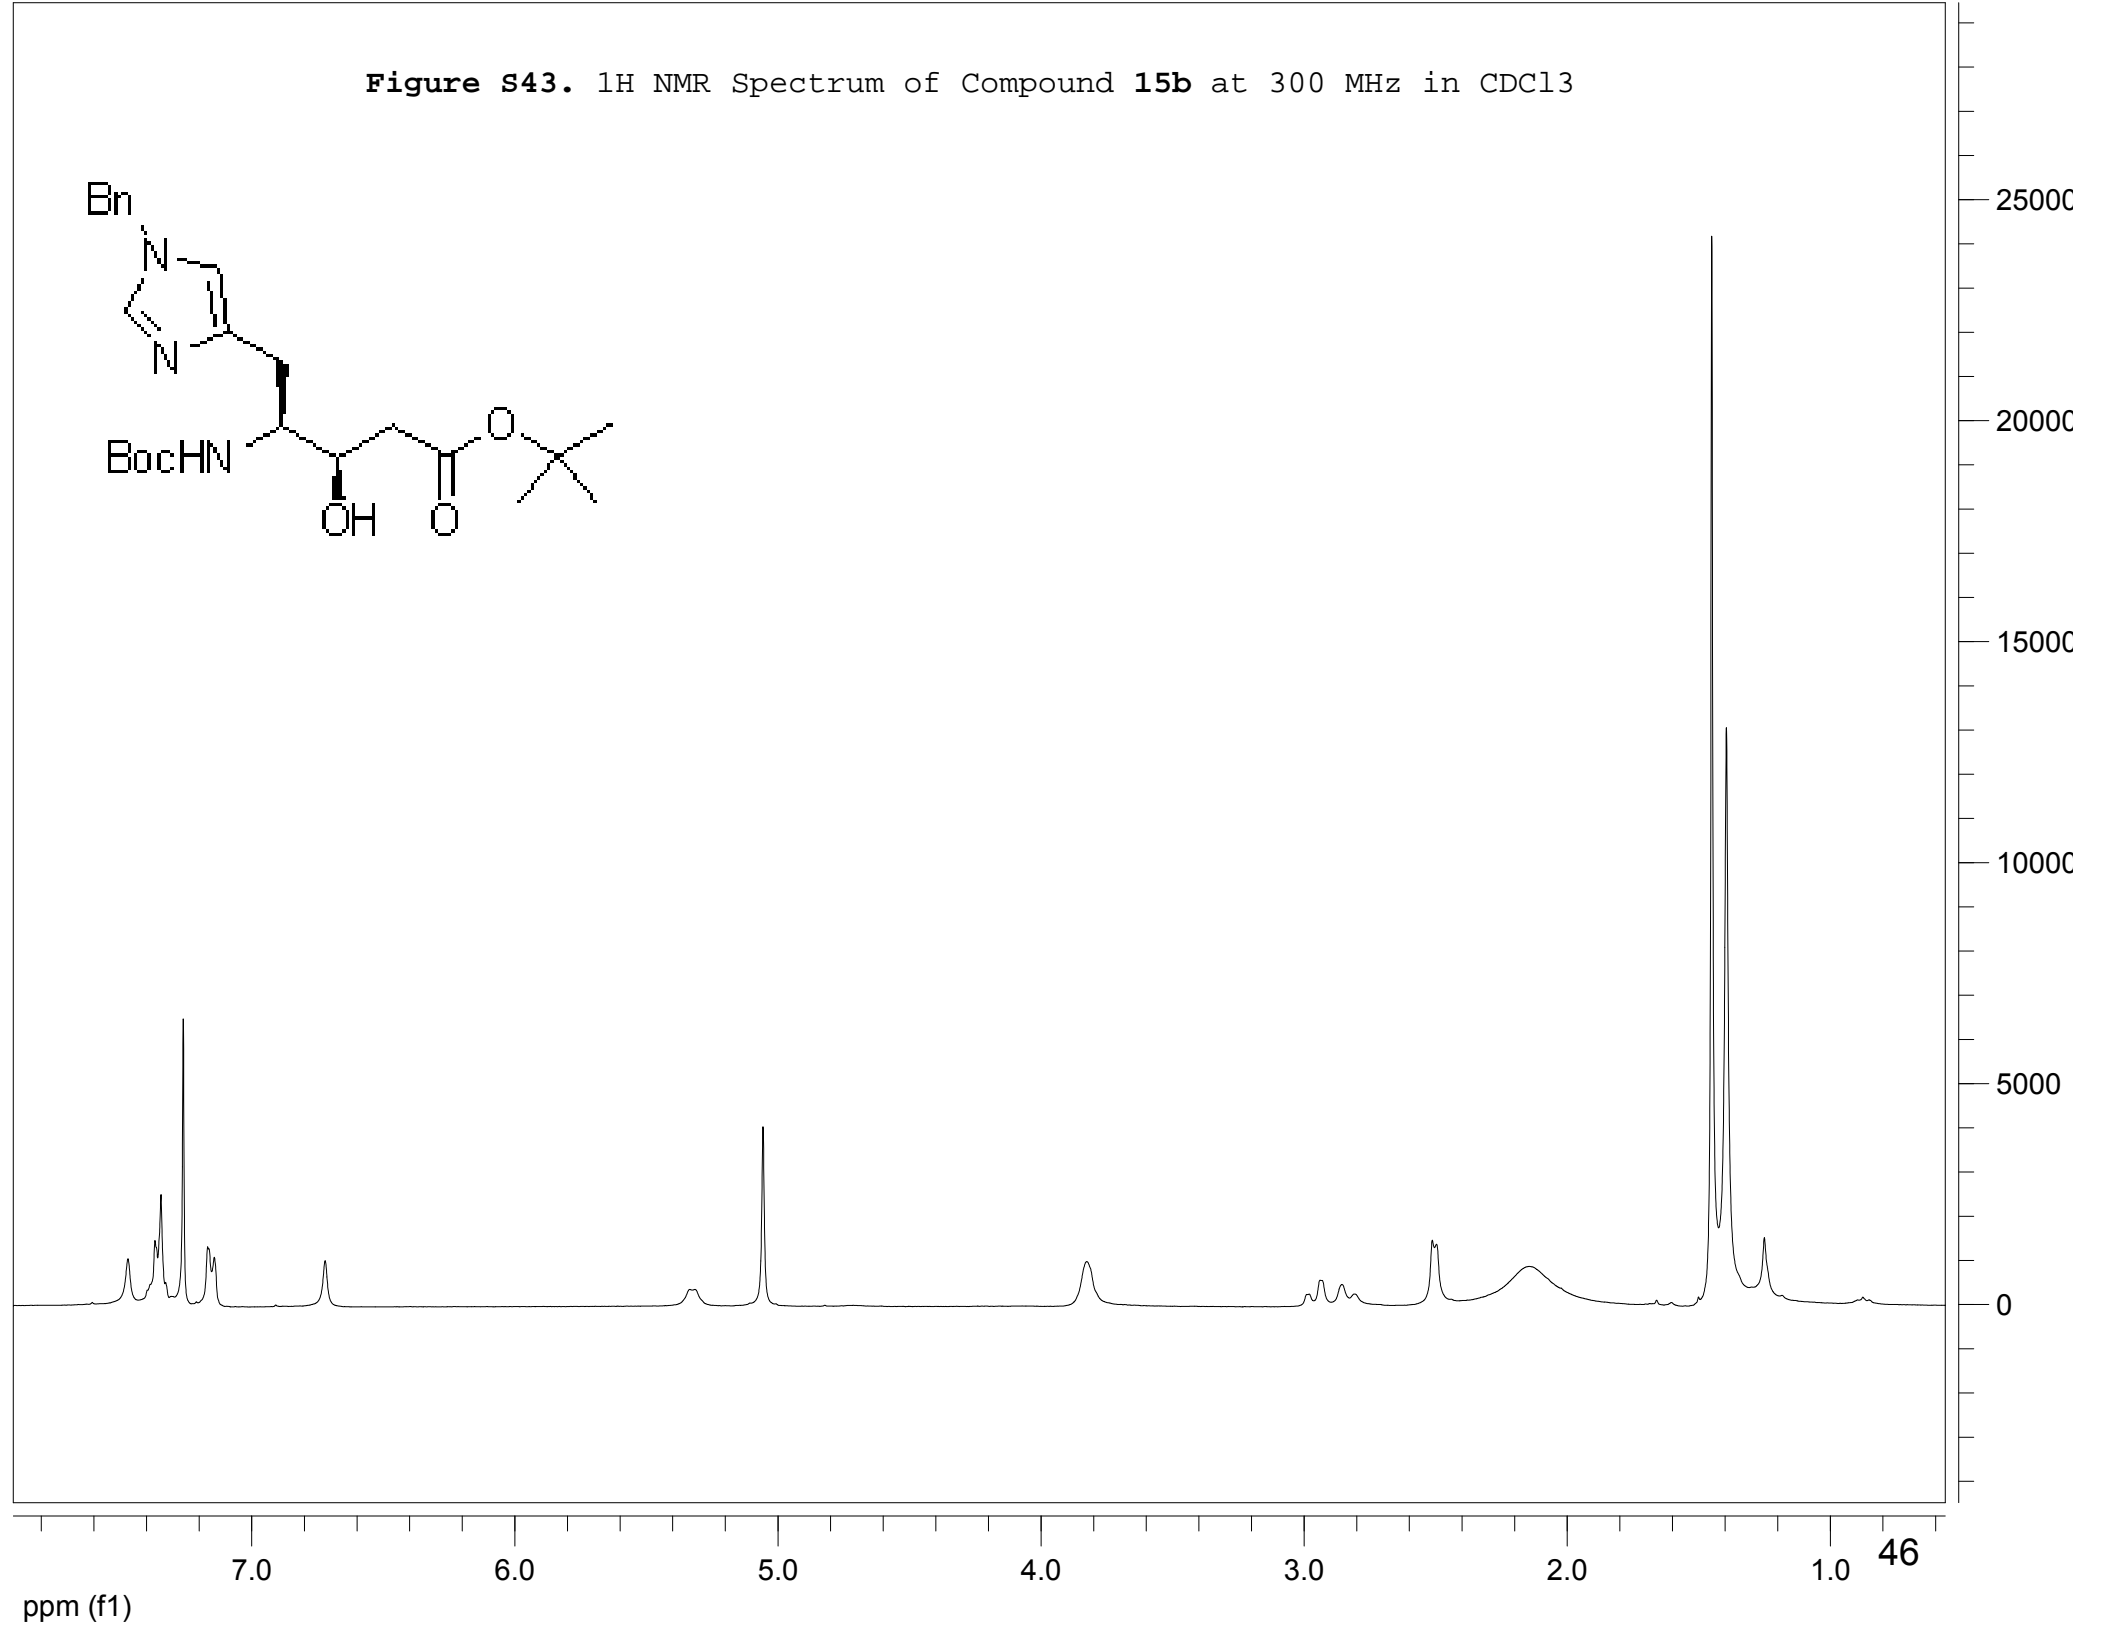

Figure S44. <sup>1</sup>H NMR Spectrum of Compound **16a** at 300 MHz in CDCl<sub>3</sub>

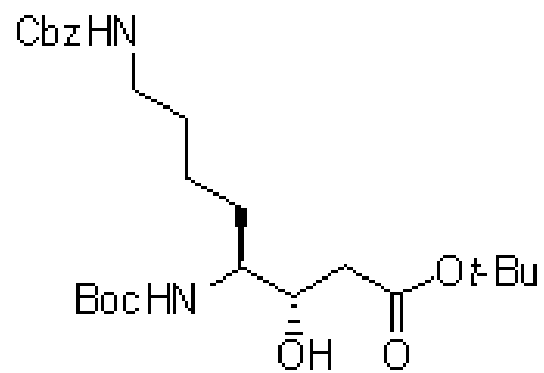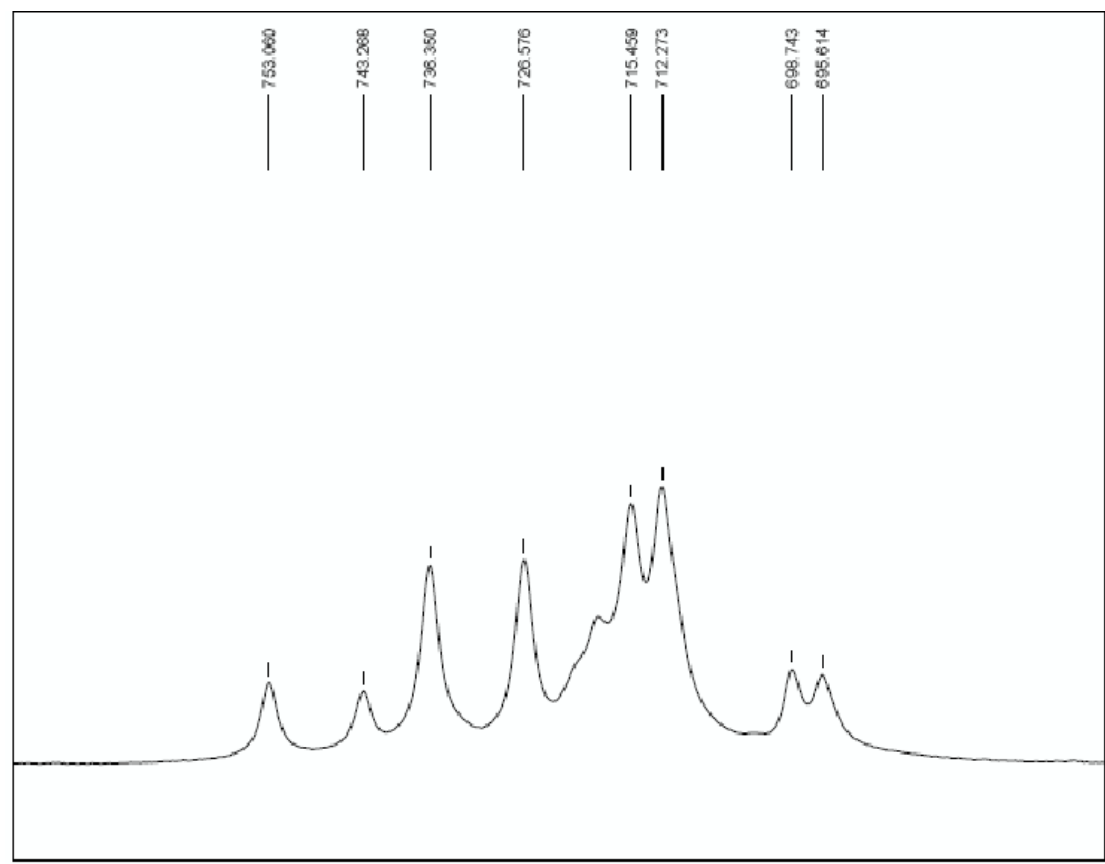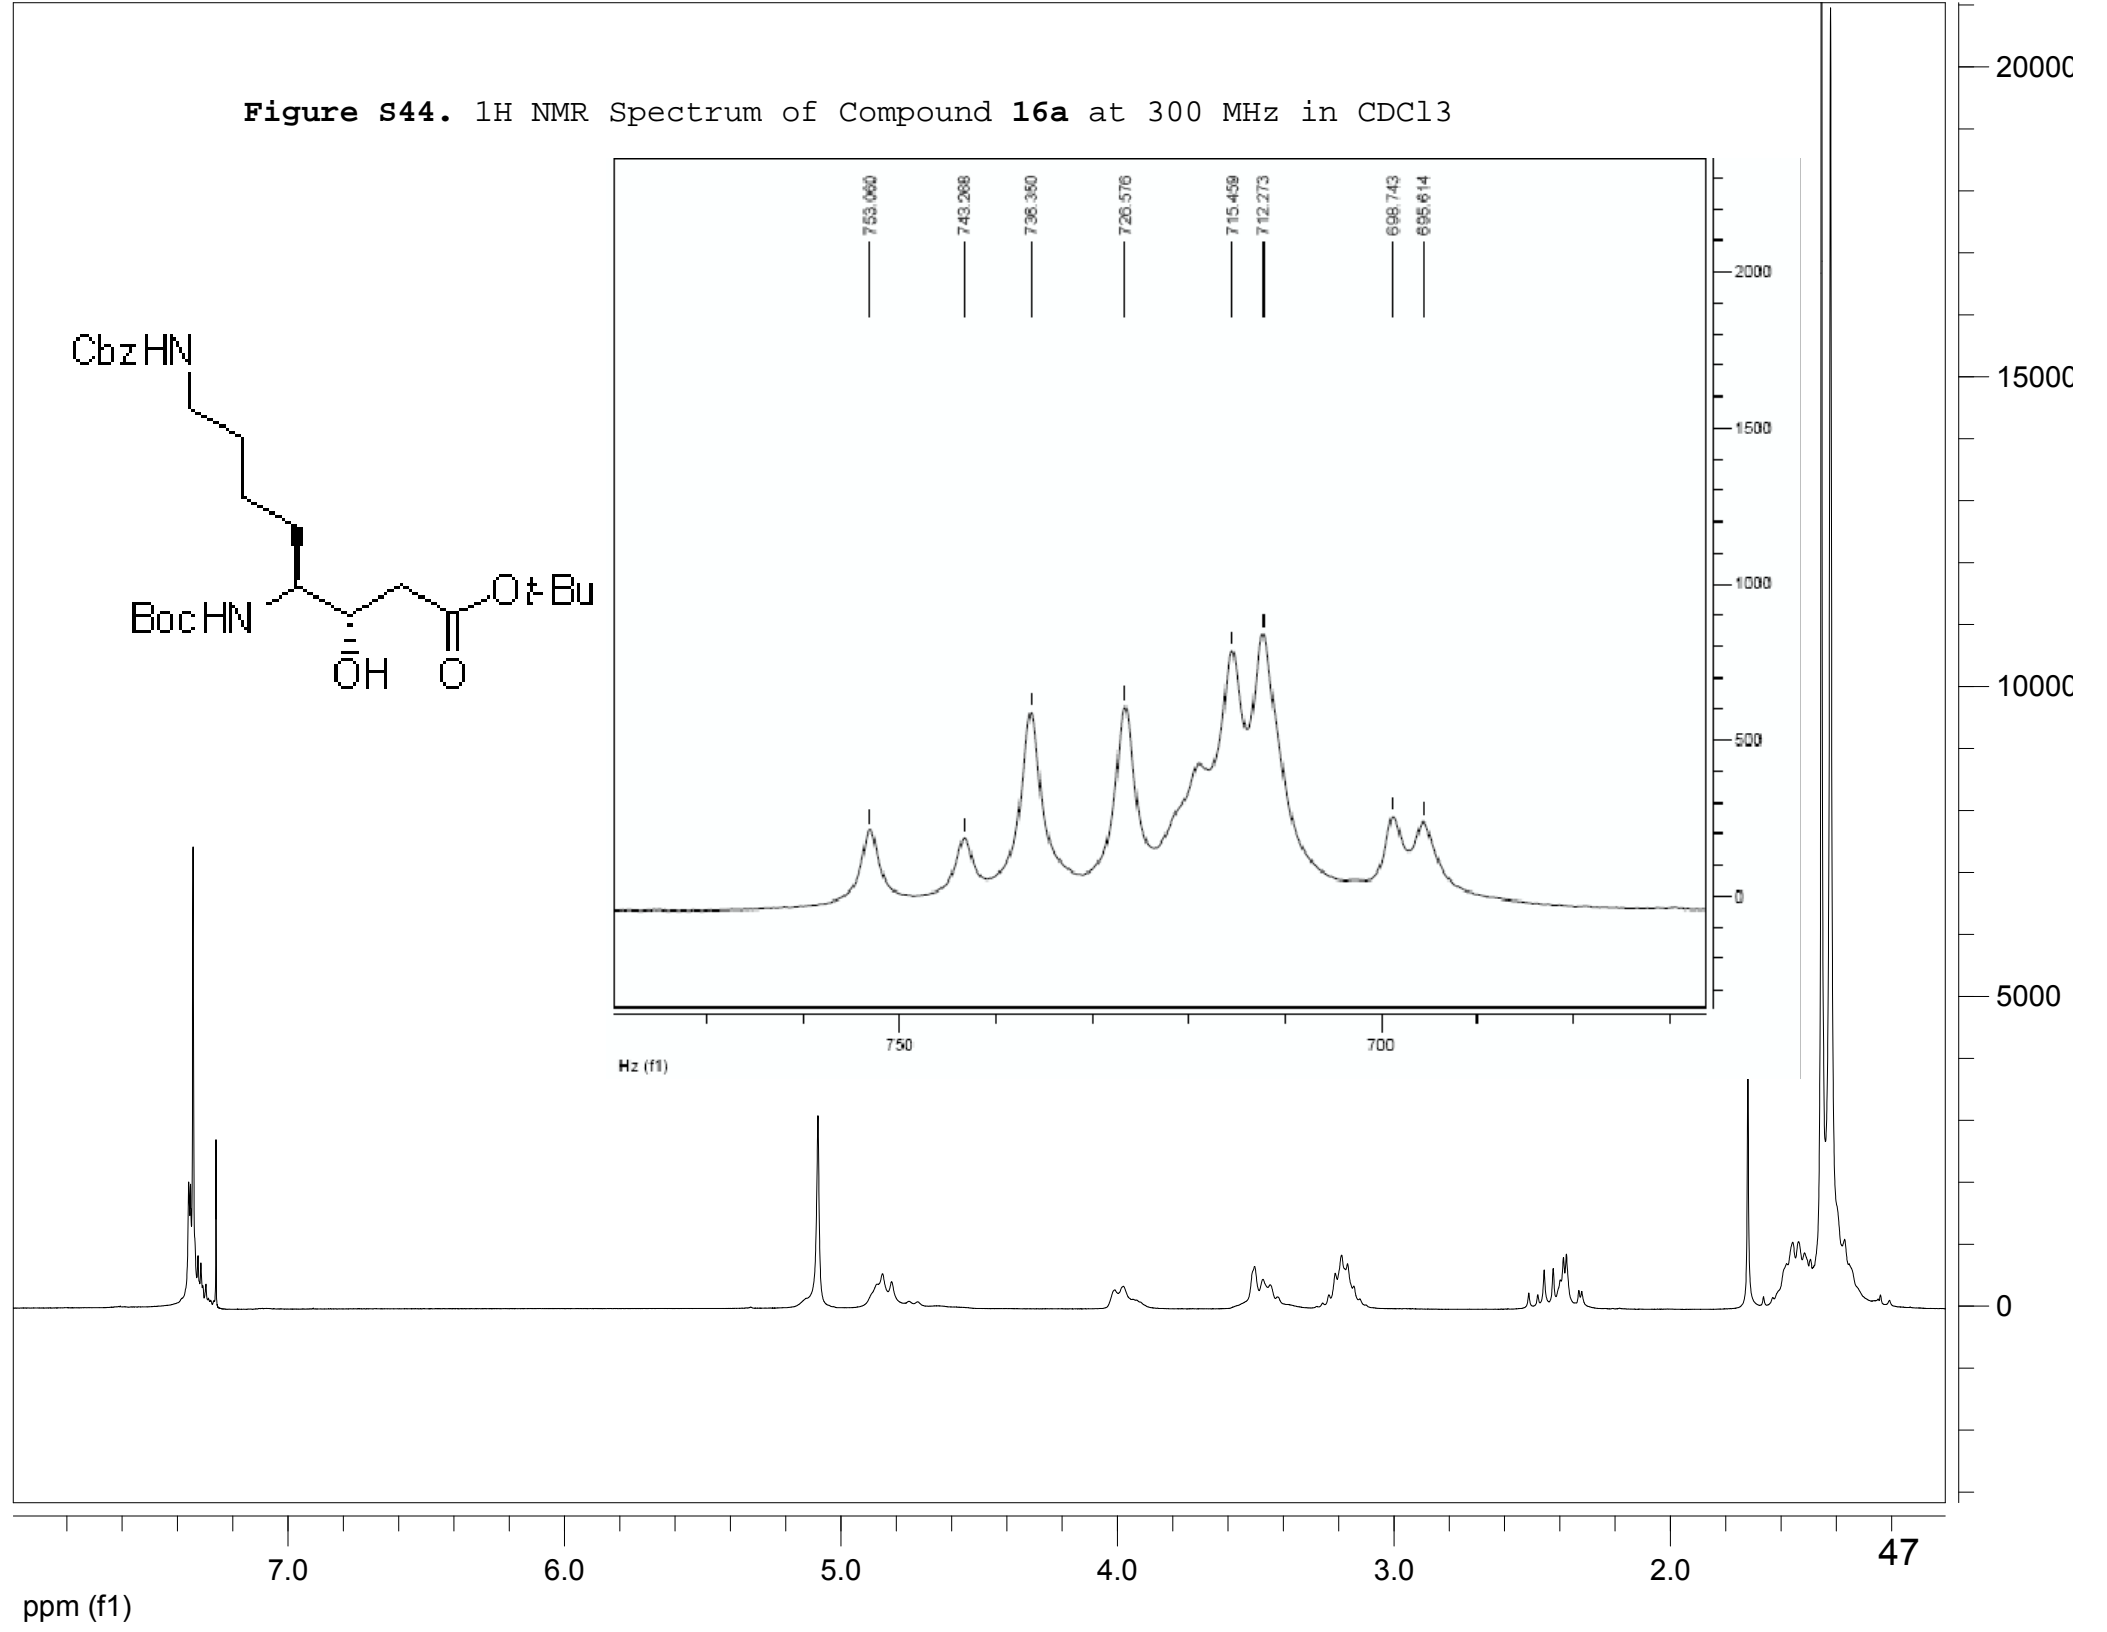

Figure S45.  $^1\text{H}$  NMR Spectrum of Compound **16b** at 300 MHz in  $\text{CDCl}_3$

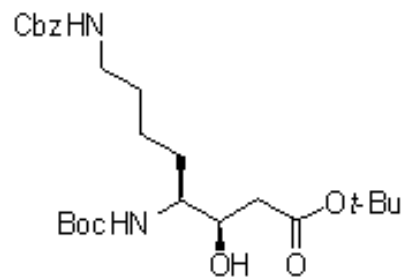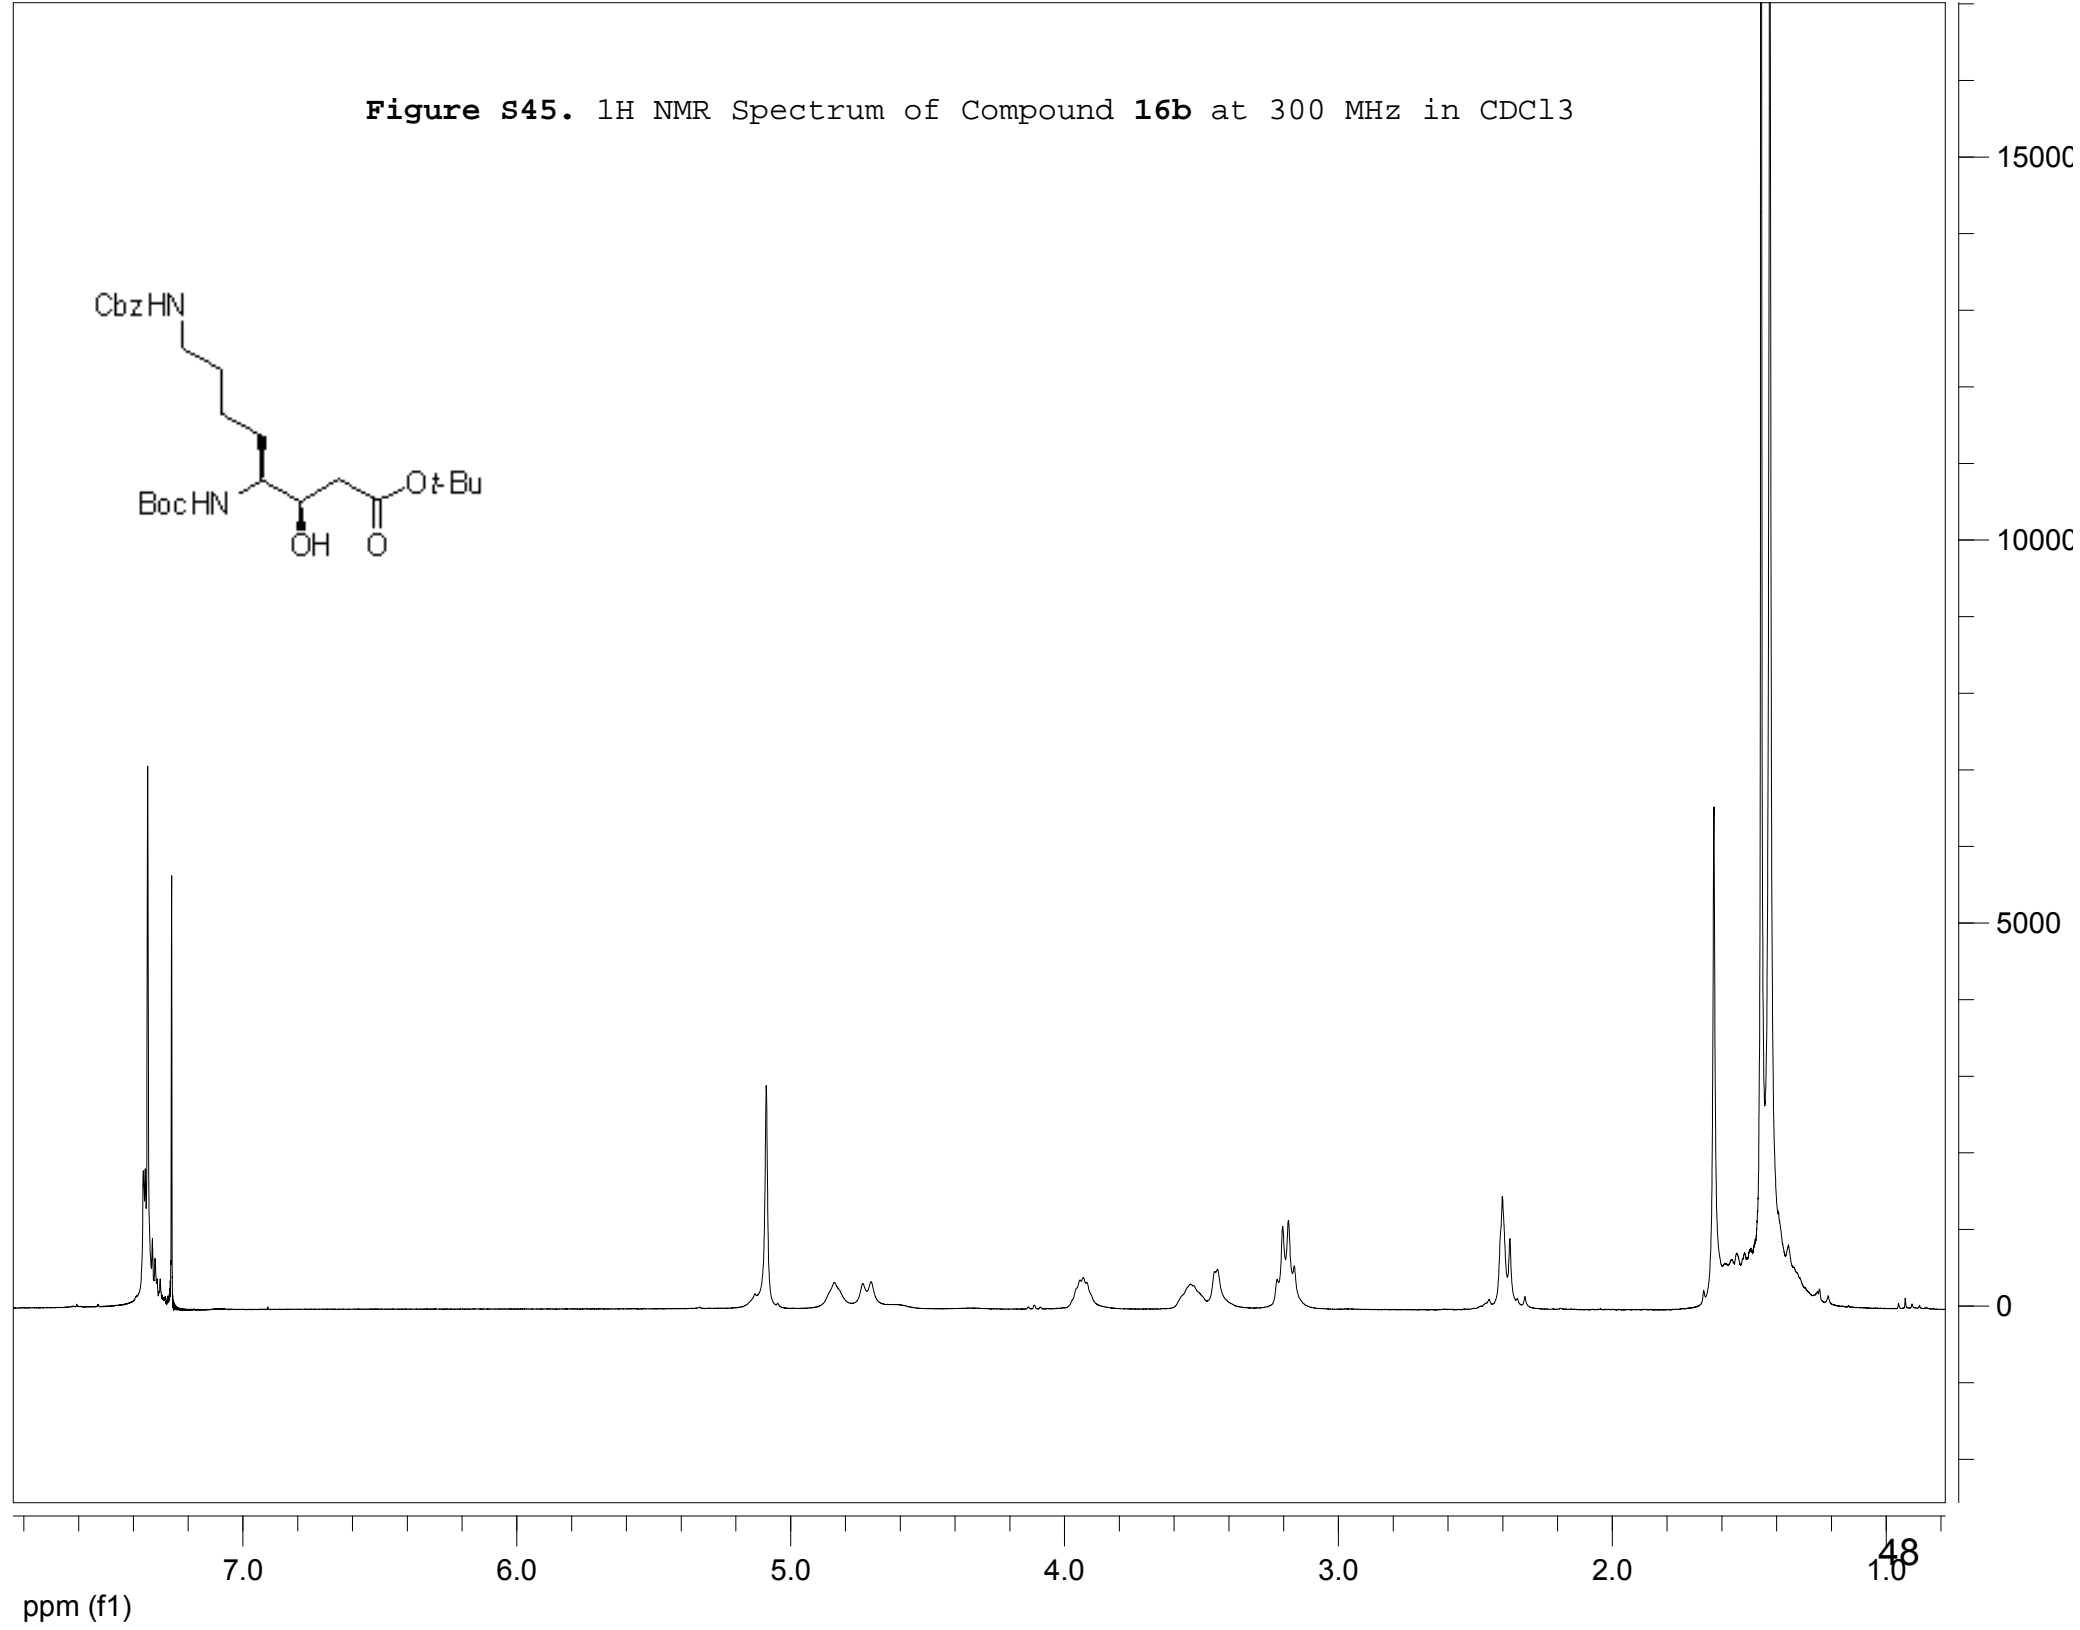



Figure S46. <sup>1</sup>H NMR Spectrum of Compound 17a at 300 MHz in CDCl<sub>3</sub>

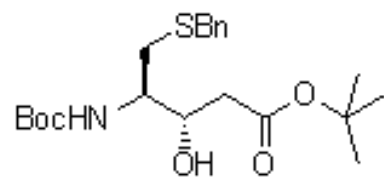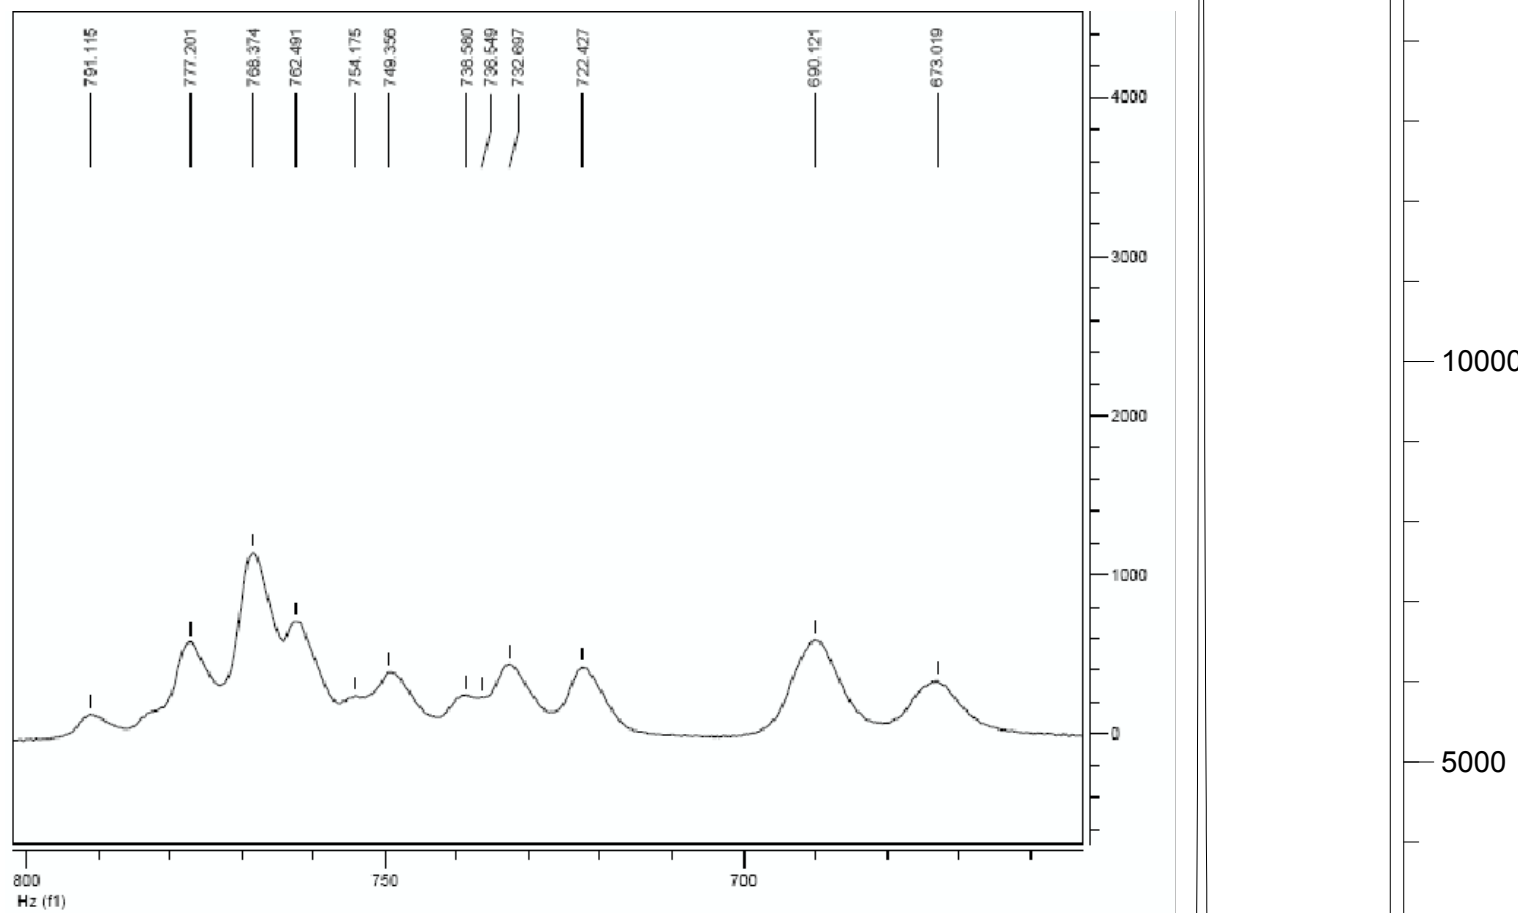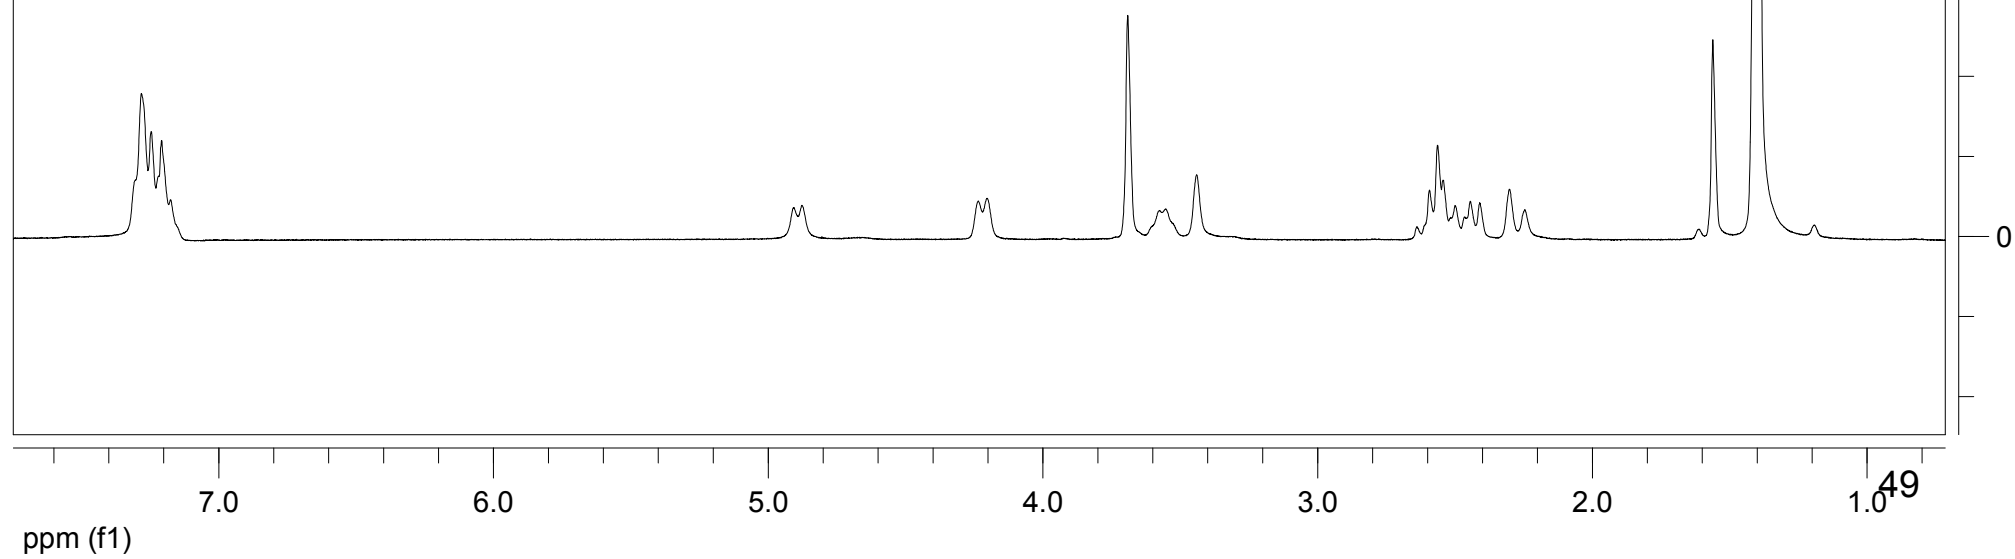

Figure S47. <sup>1</sup>H NMR Spectrum of Compound 17b at 300 MHz in CDCl<sub>3</sub>

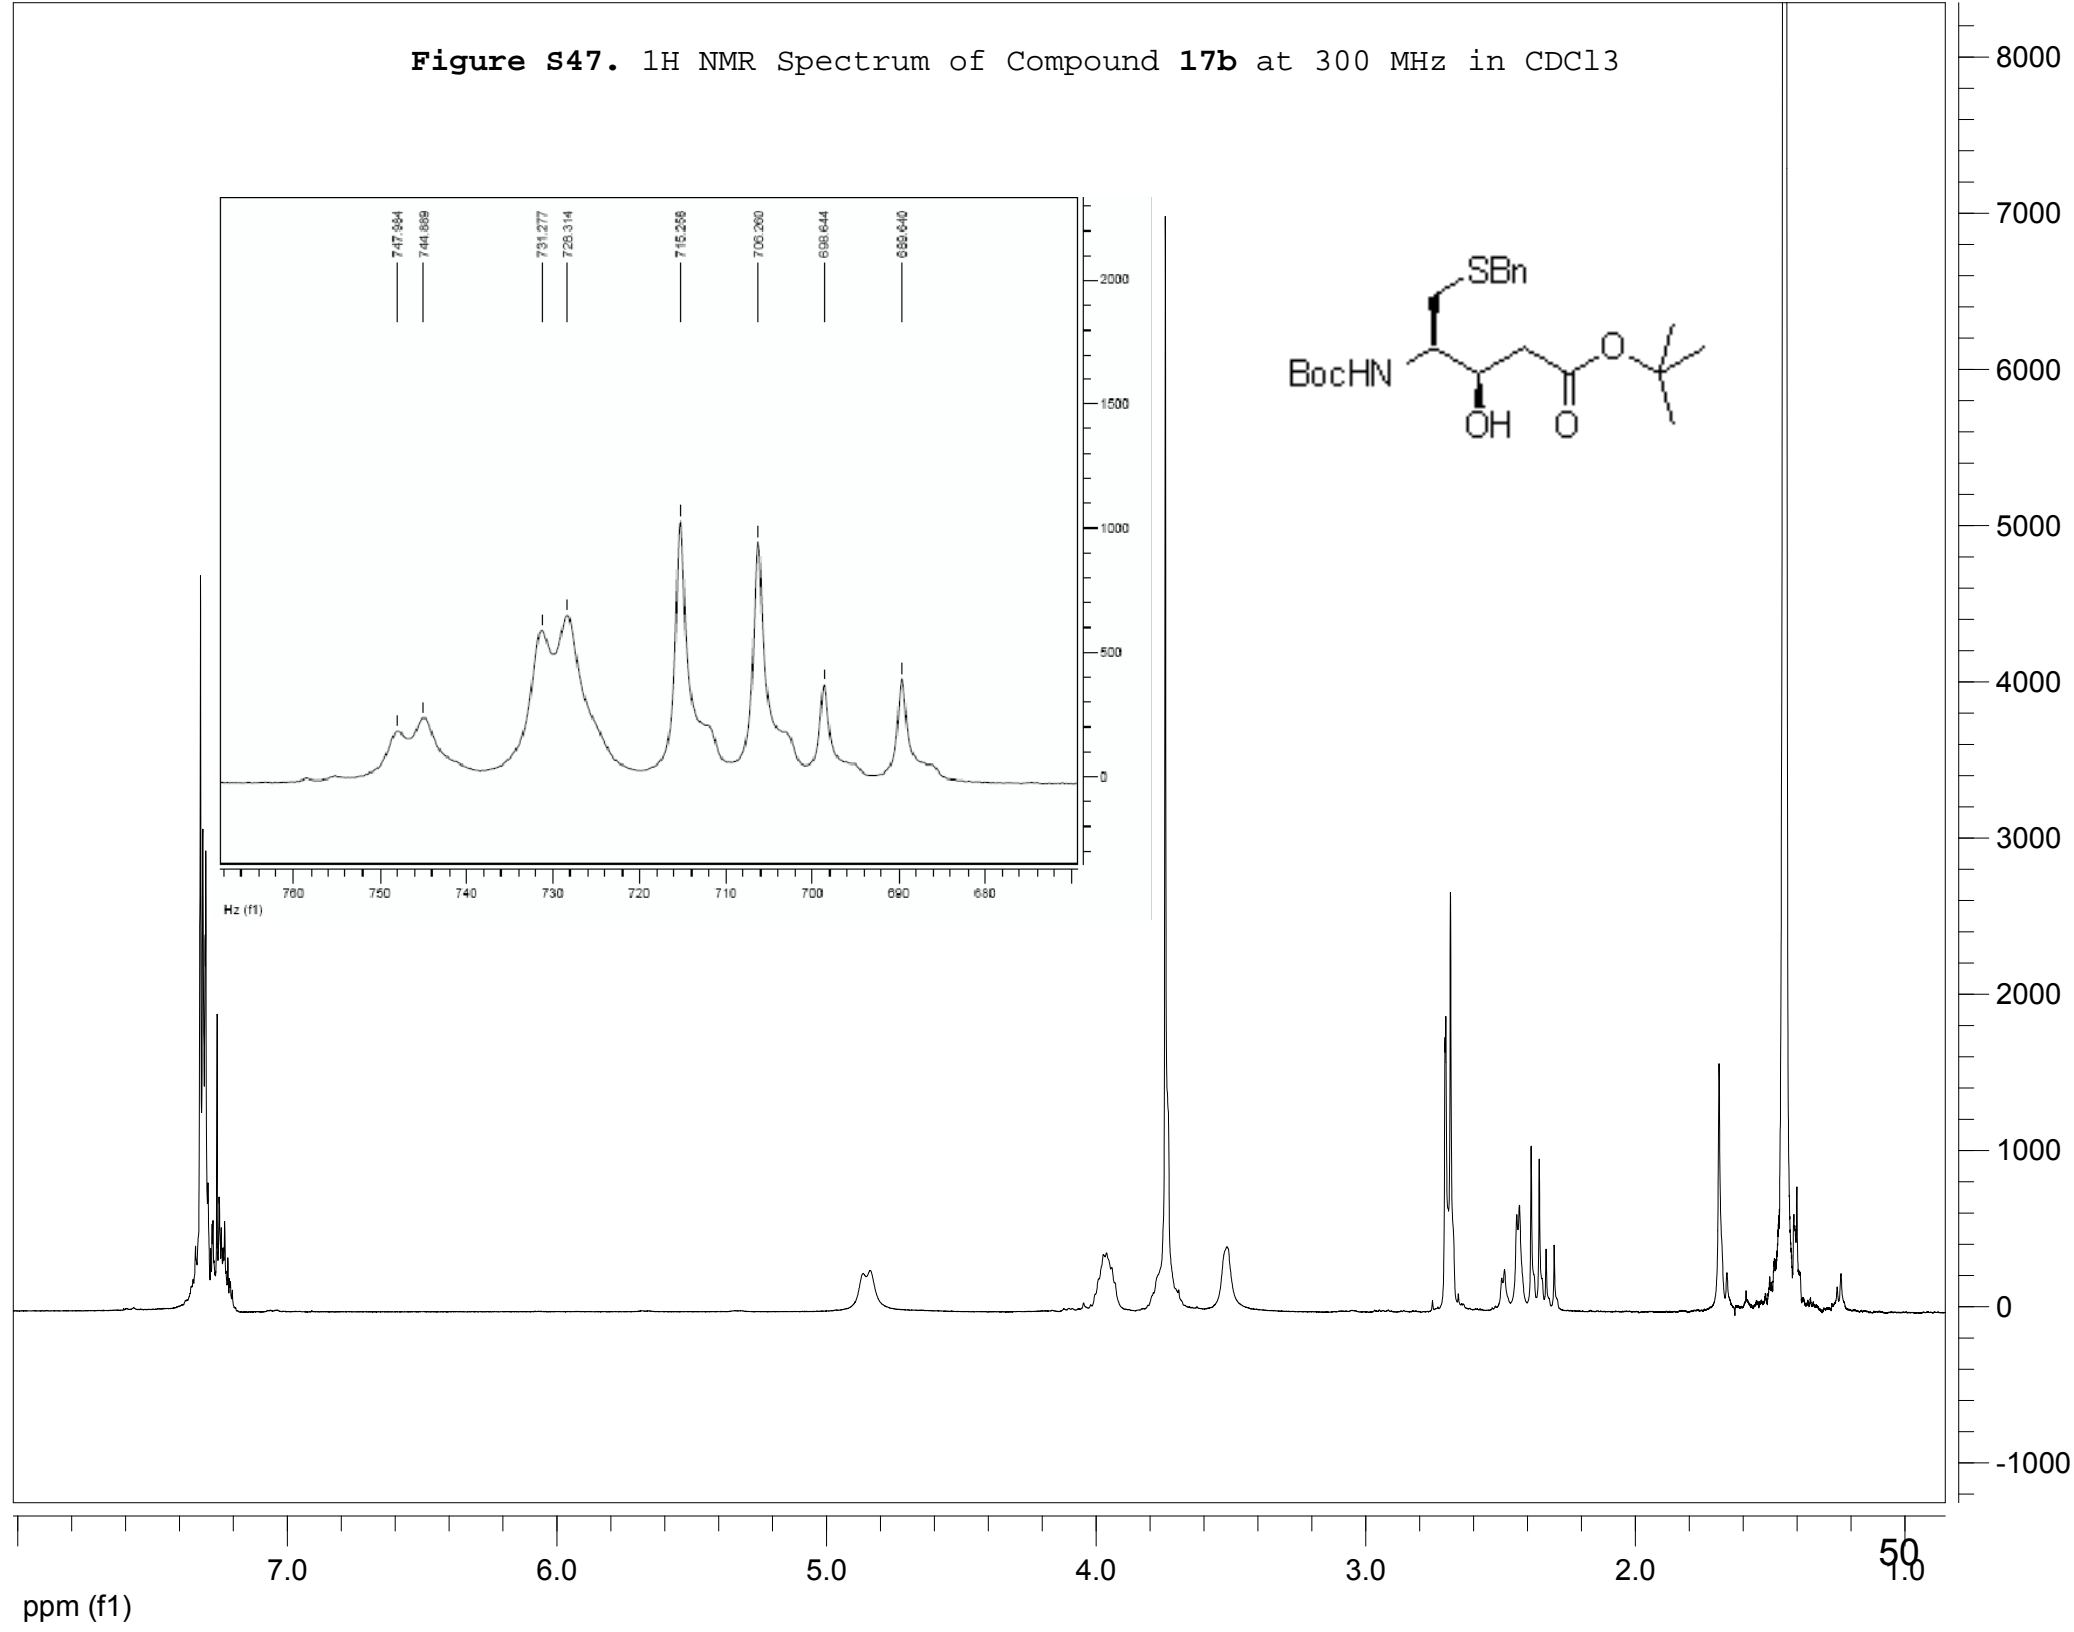

Figure S48. <sup>1</sup>H NMR Spectrum of Compound **19a** at 300 MHz in CDCl<sub>3</sub>

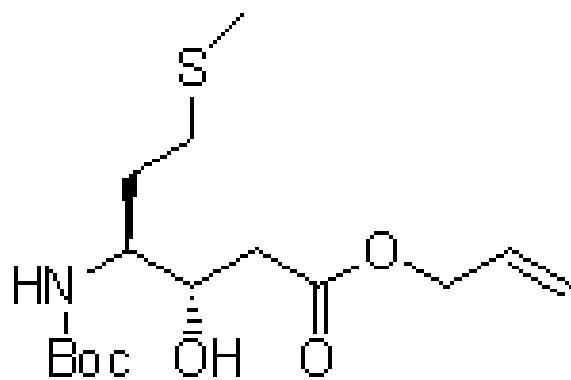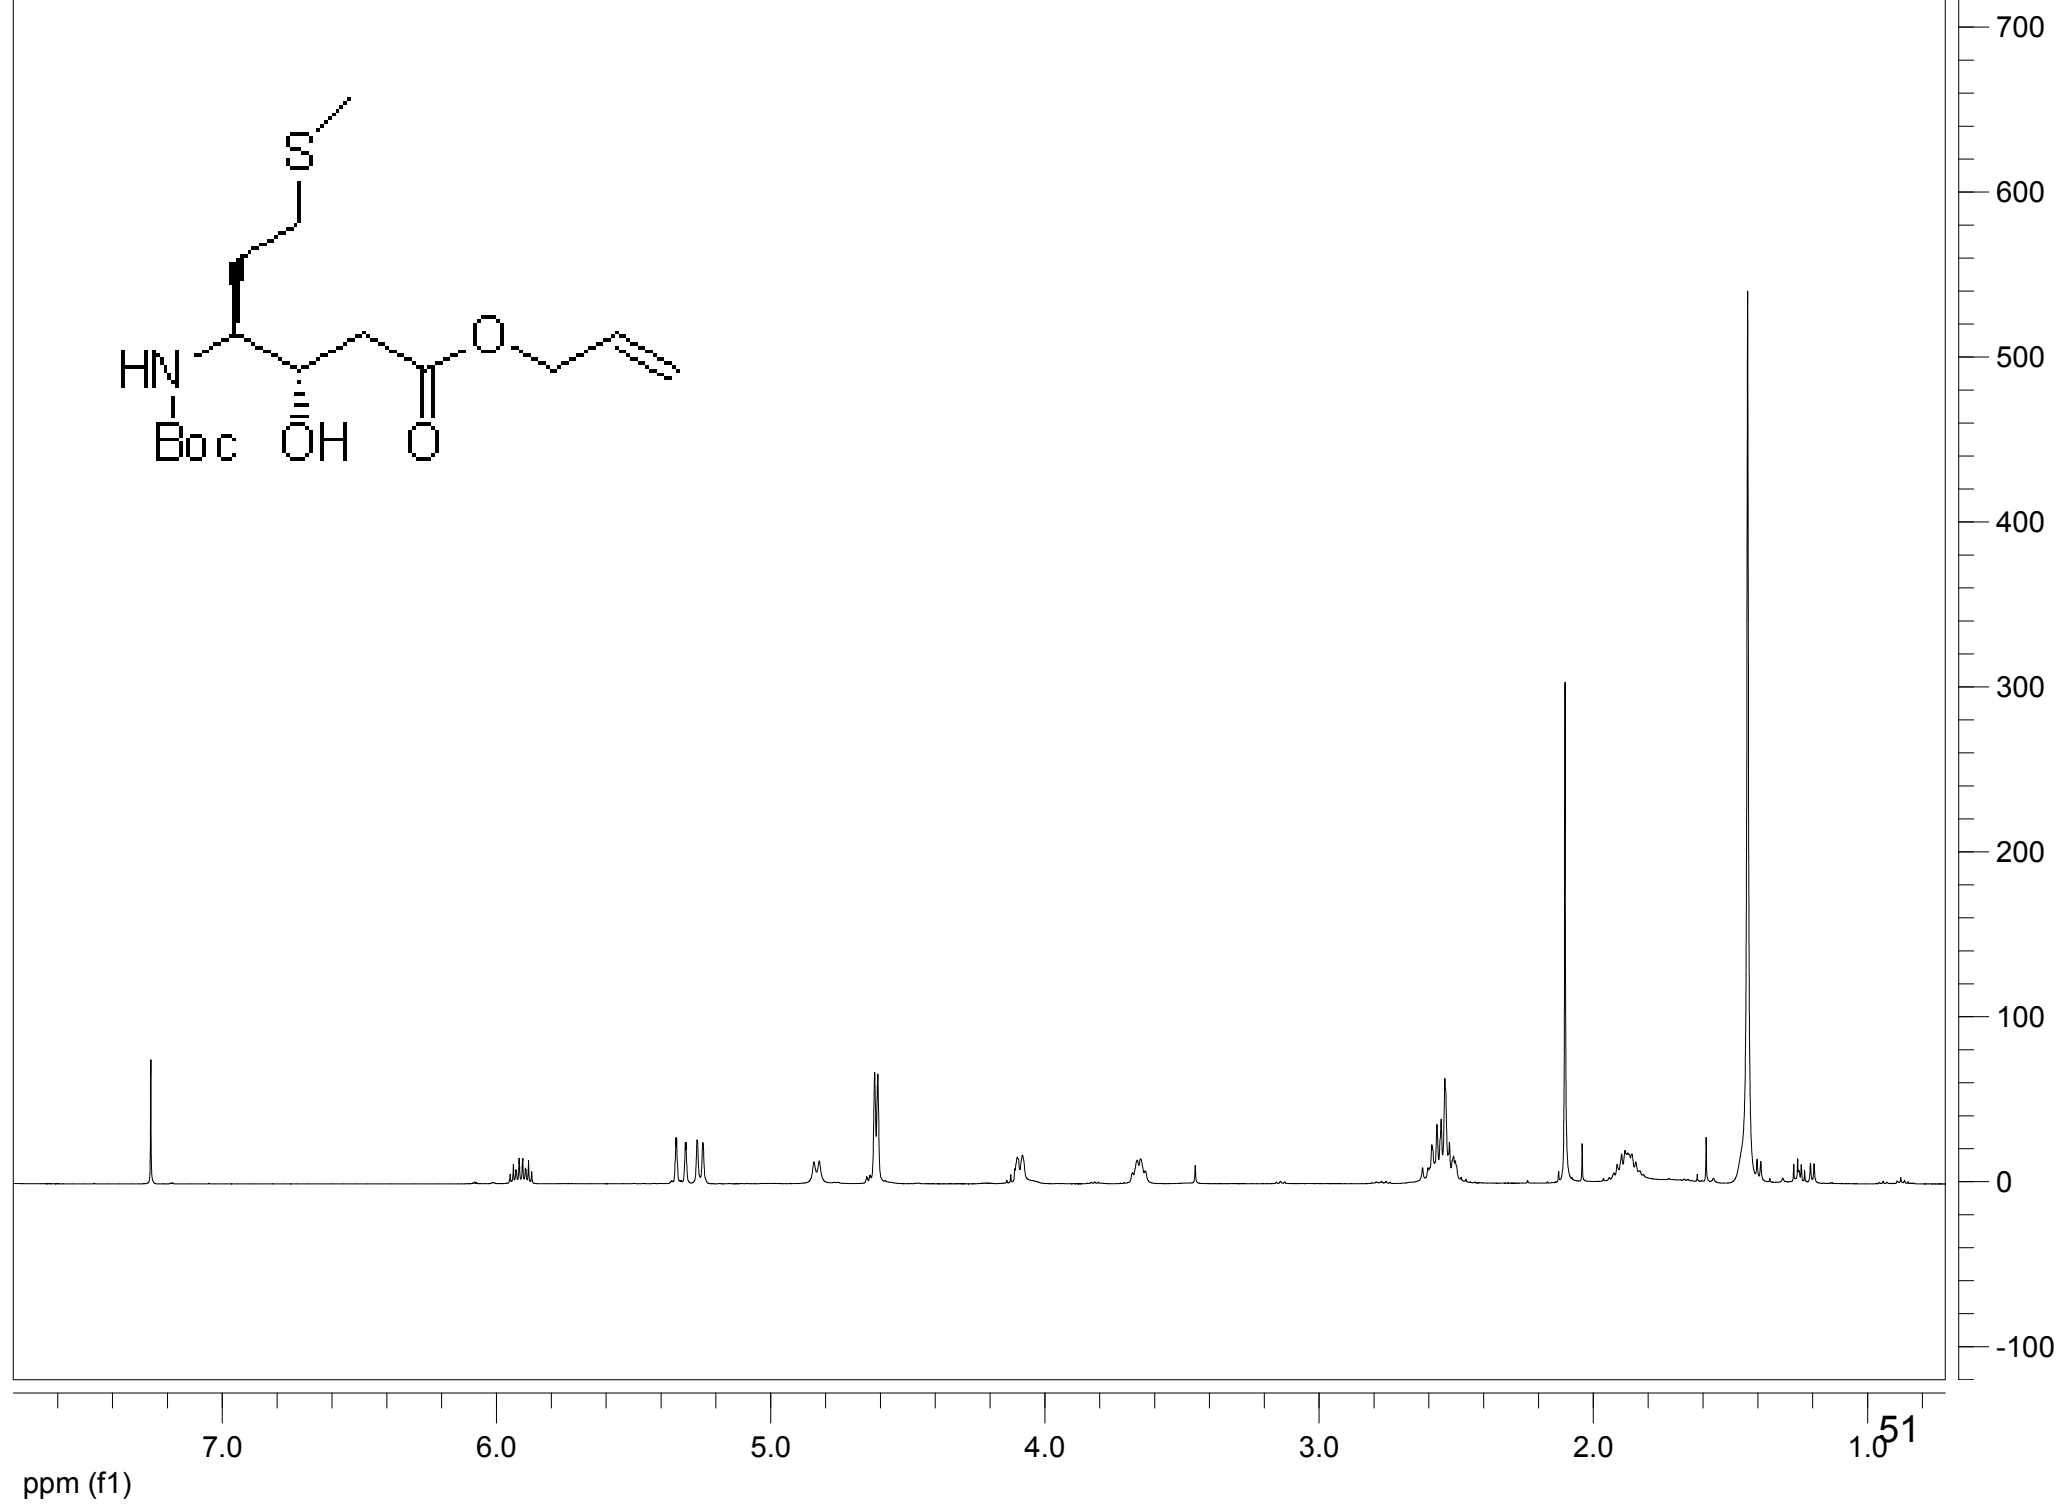

Figure S49. <sup>1</sup>H NMR Spectrum of Compound **19b** at 300 MHz in CDCl<sub>3</sub>

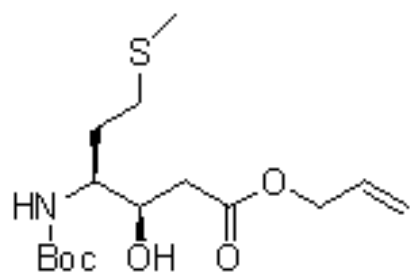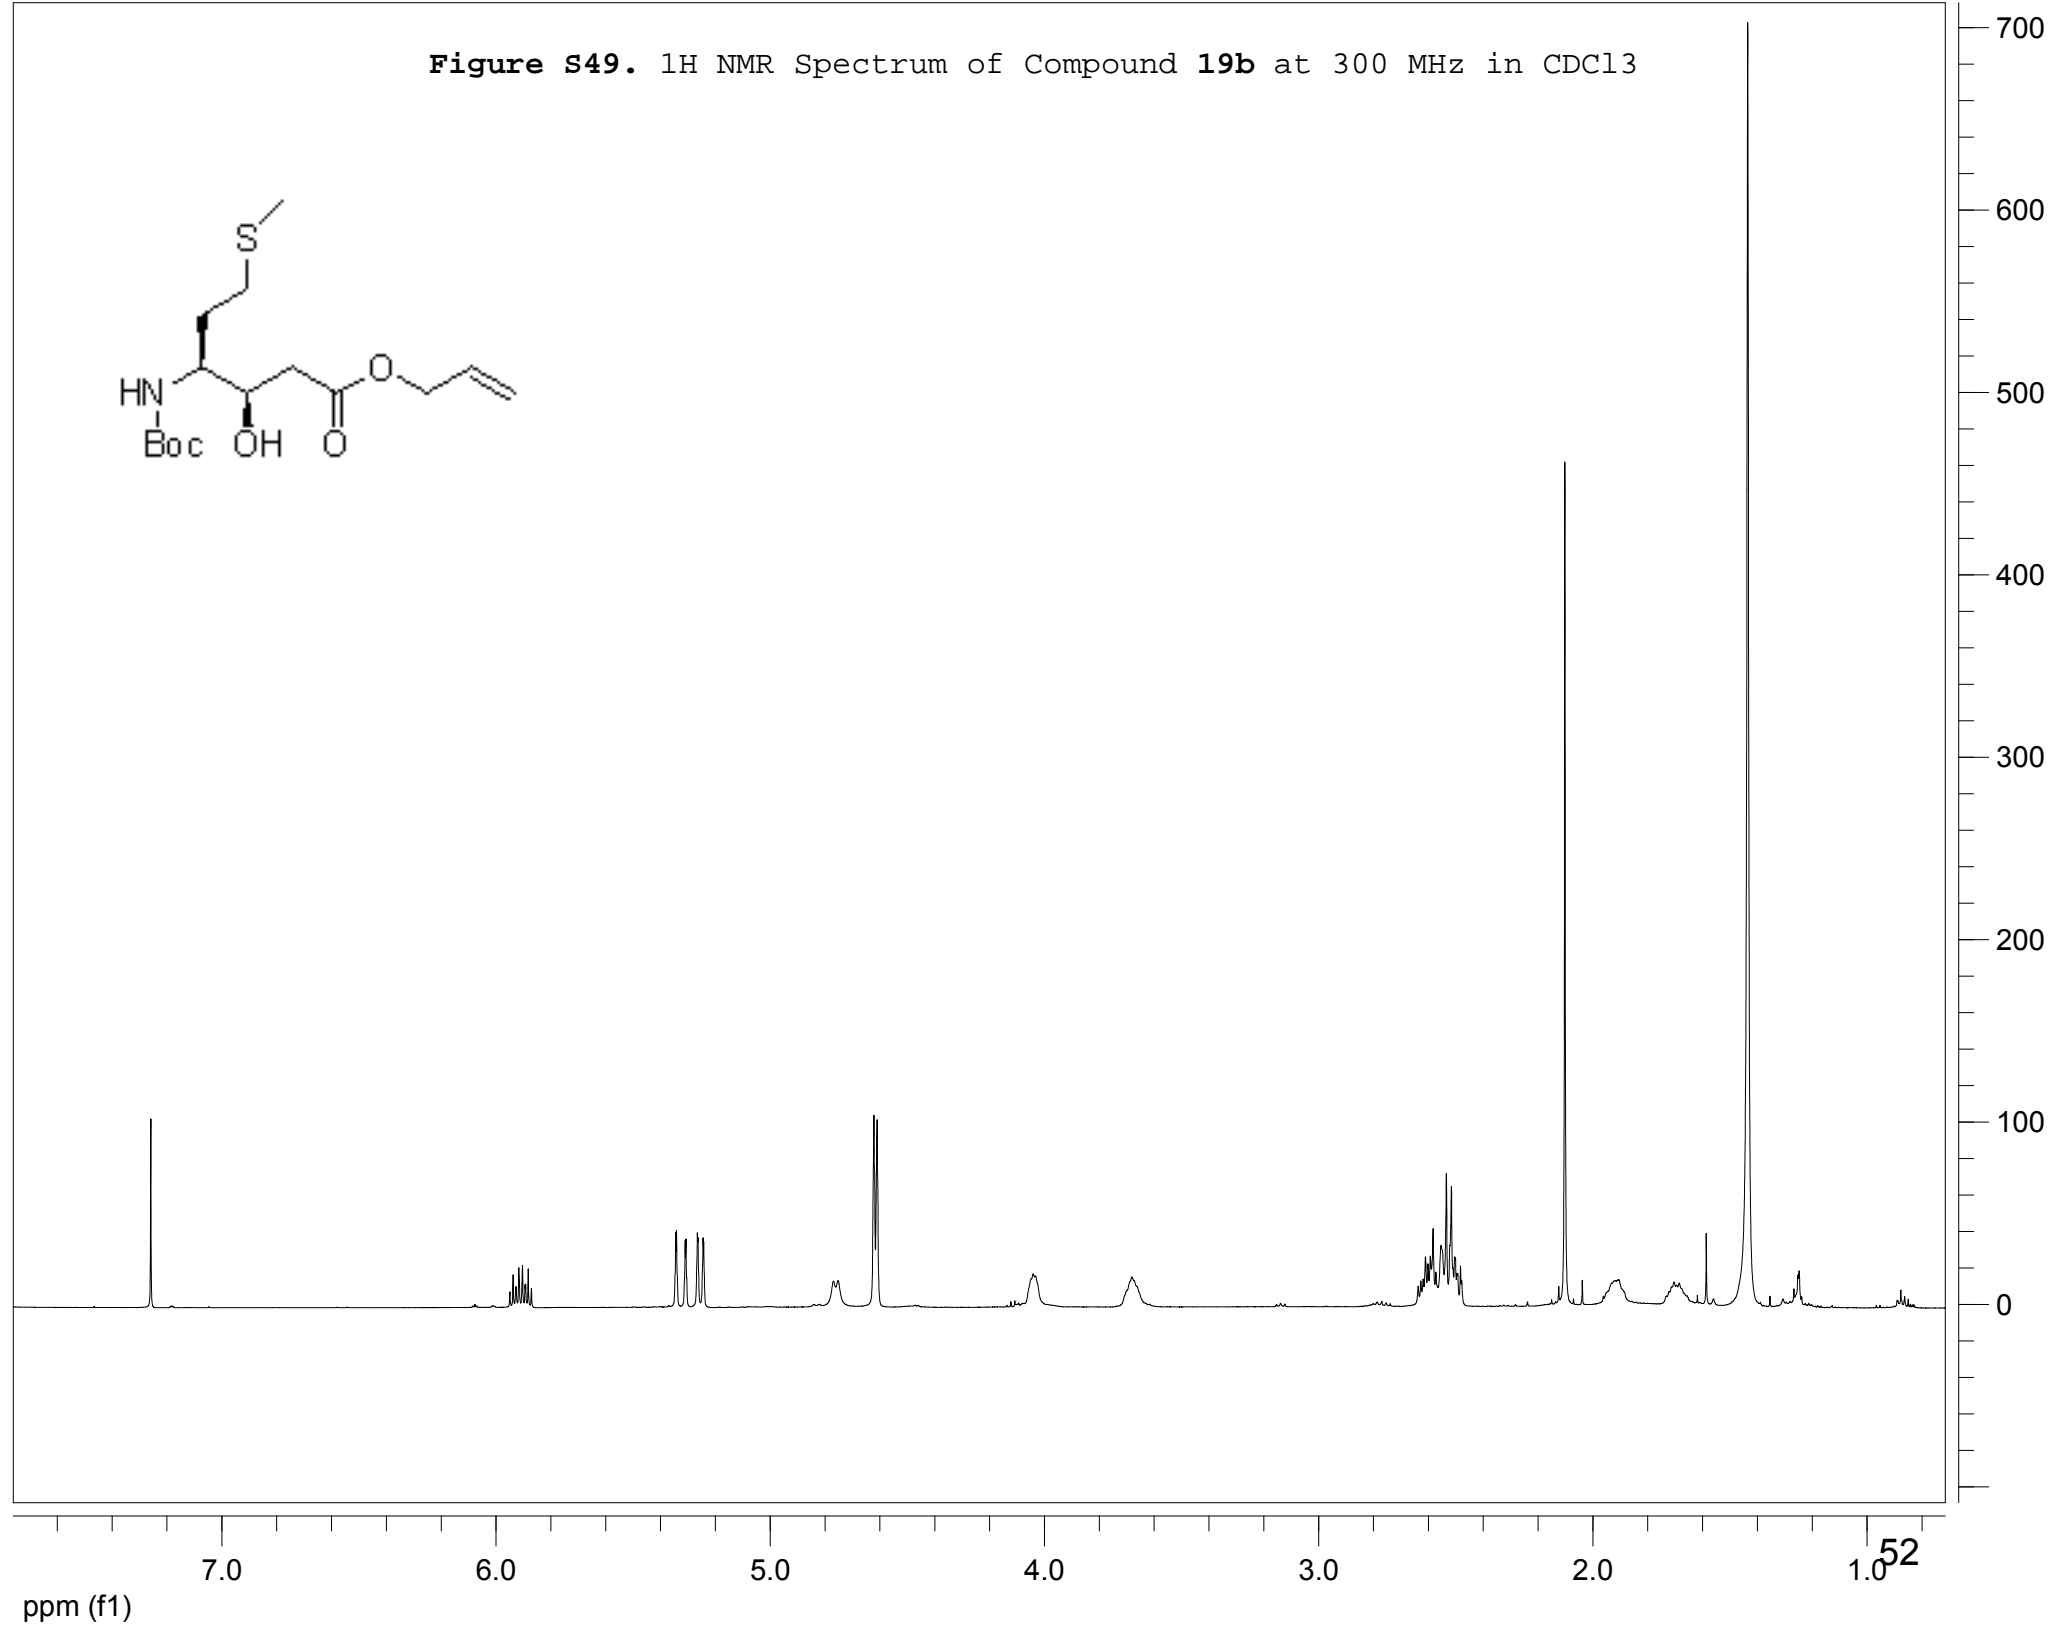

Figure S50. <sup>1</sup>H NMR Spectrum of Compound **20a** at 300 MHz in CDCl<sub>3</sub>

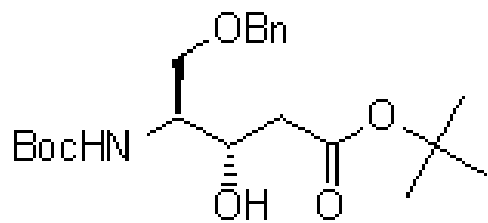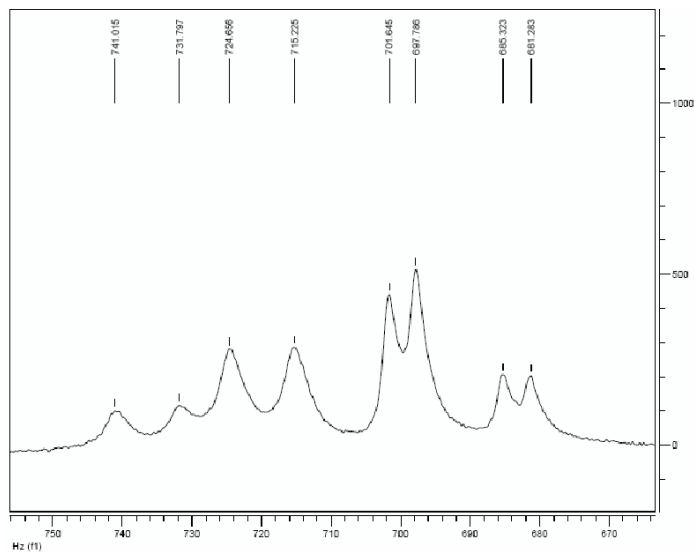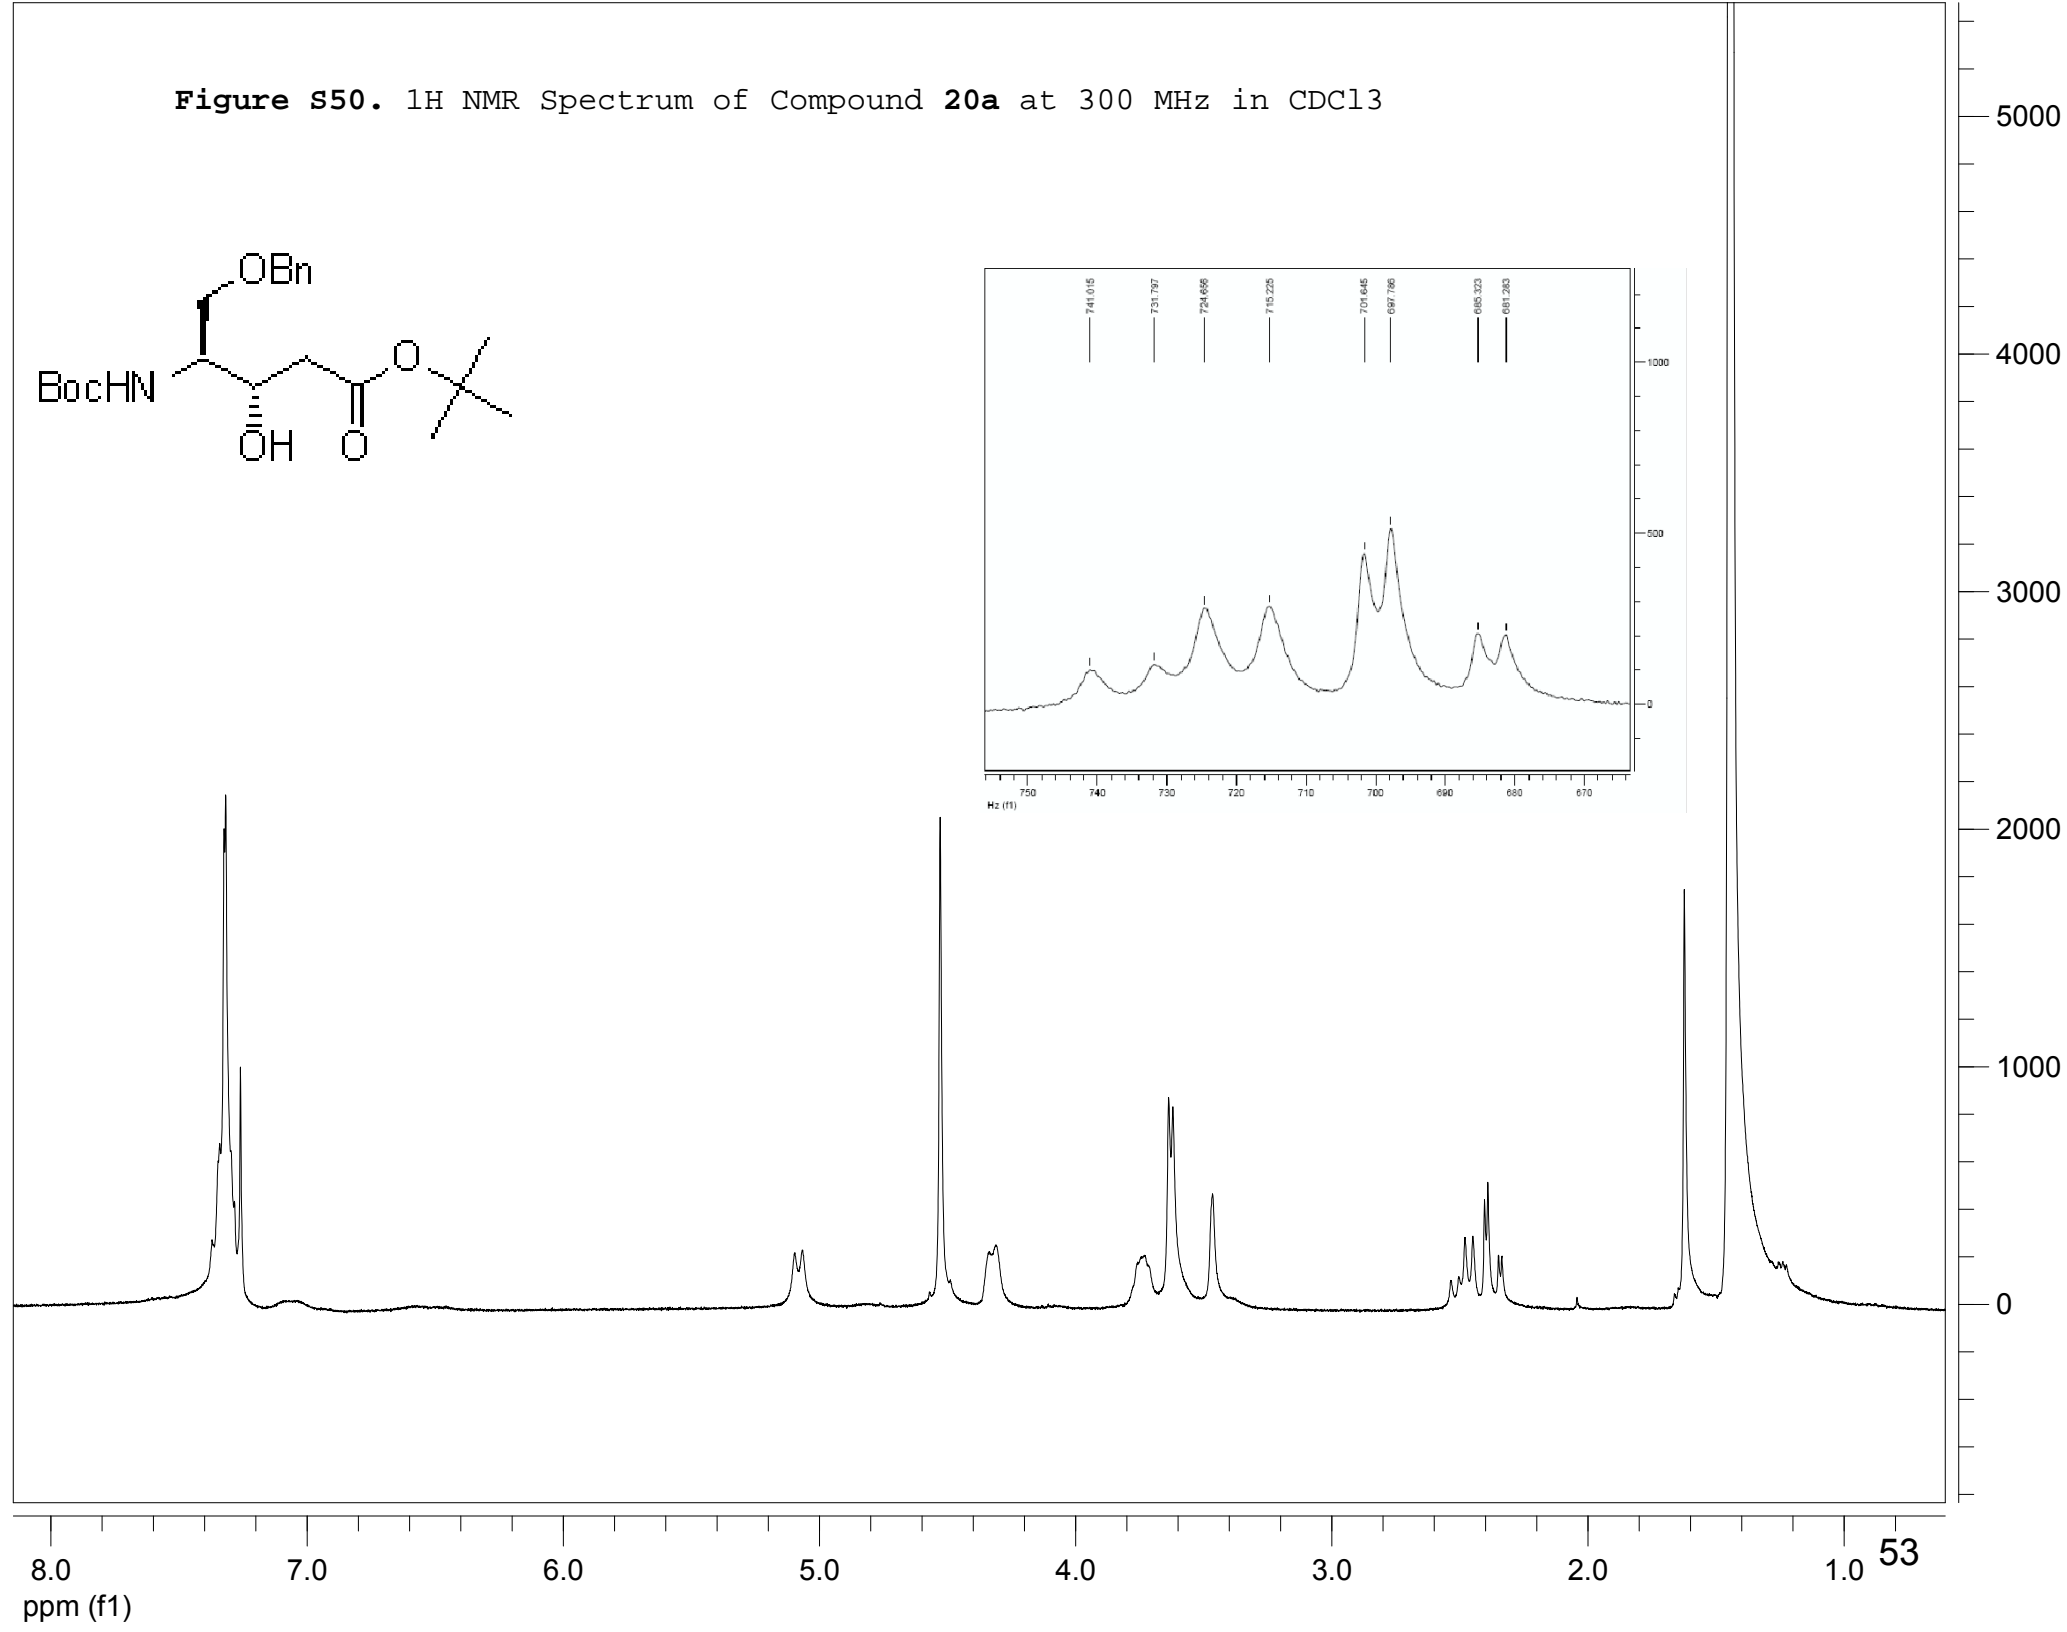

Figure S51. <sup>1</sup>H NMR Spectrum of Compound **20b** at 300 MHz in CDCl<sub>3</sub>

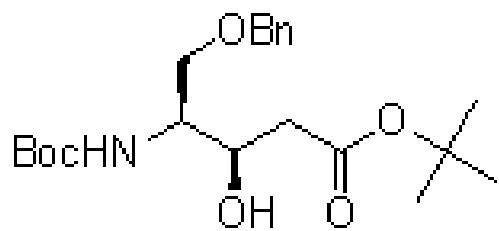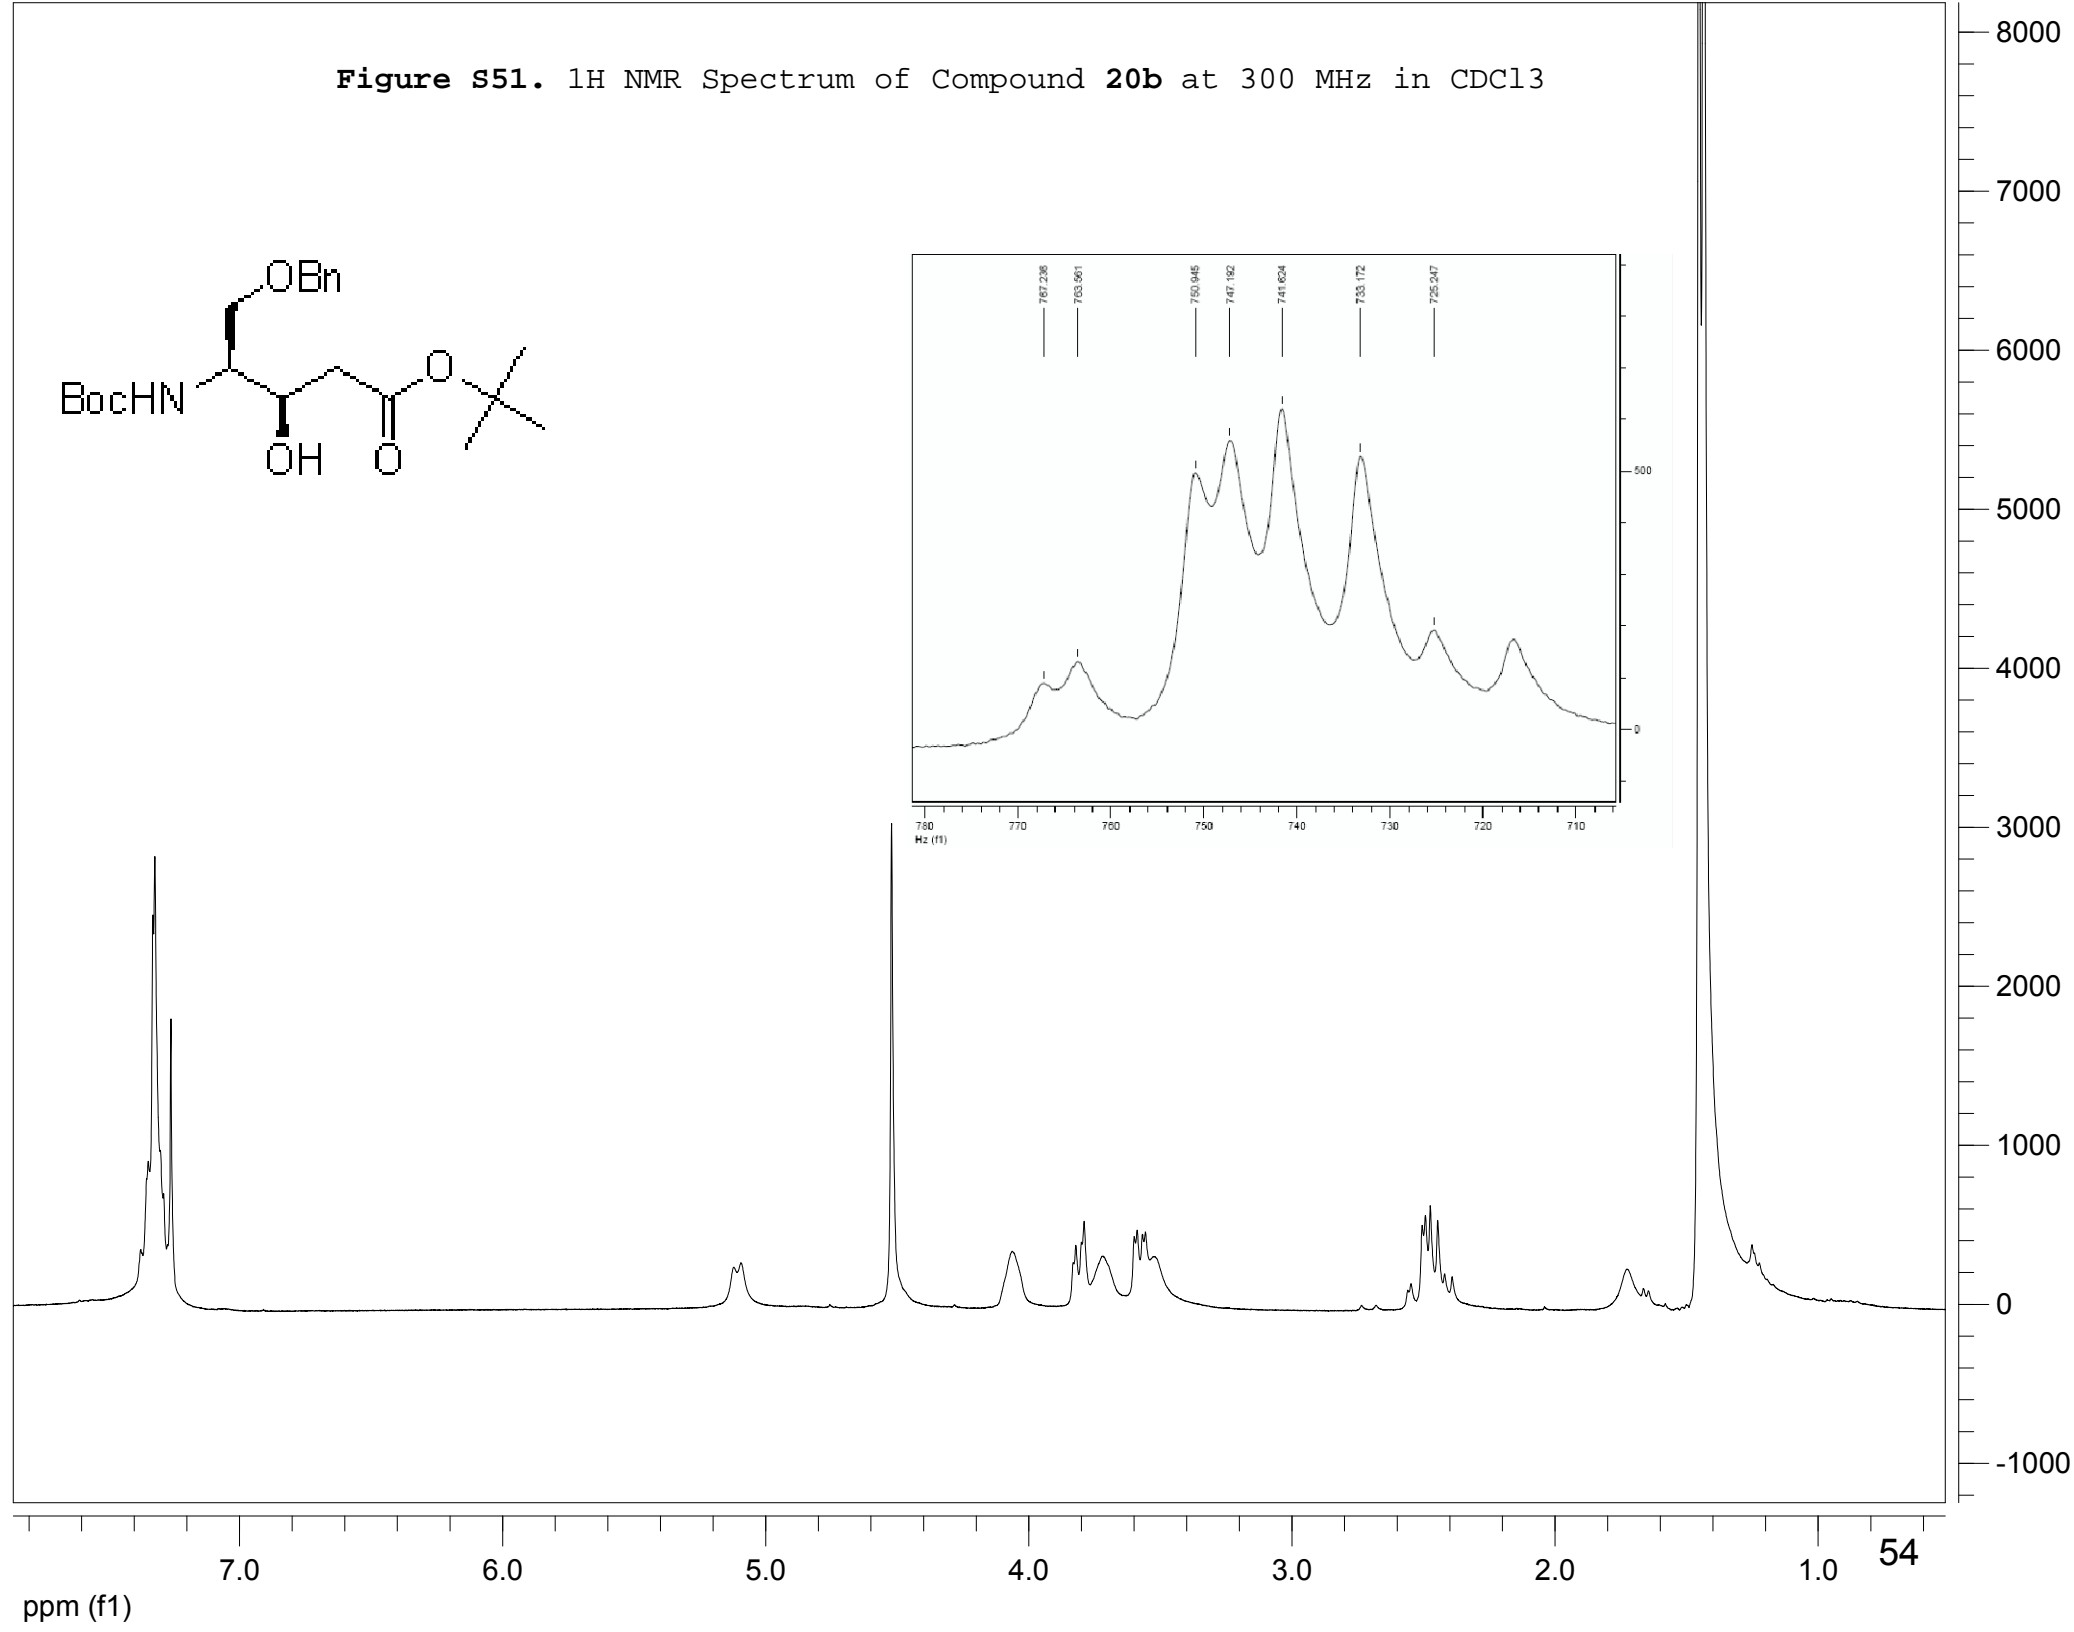

Figure S52. <sup>1</sup>H NMR Spectrum of Compound **21a** at 300 MHz in CDCl<sub>3</sub>

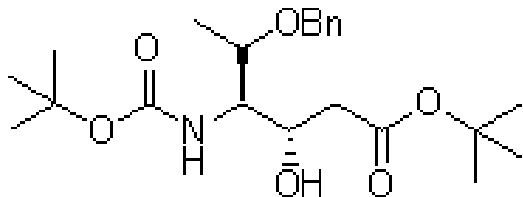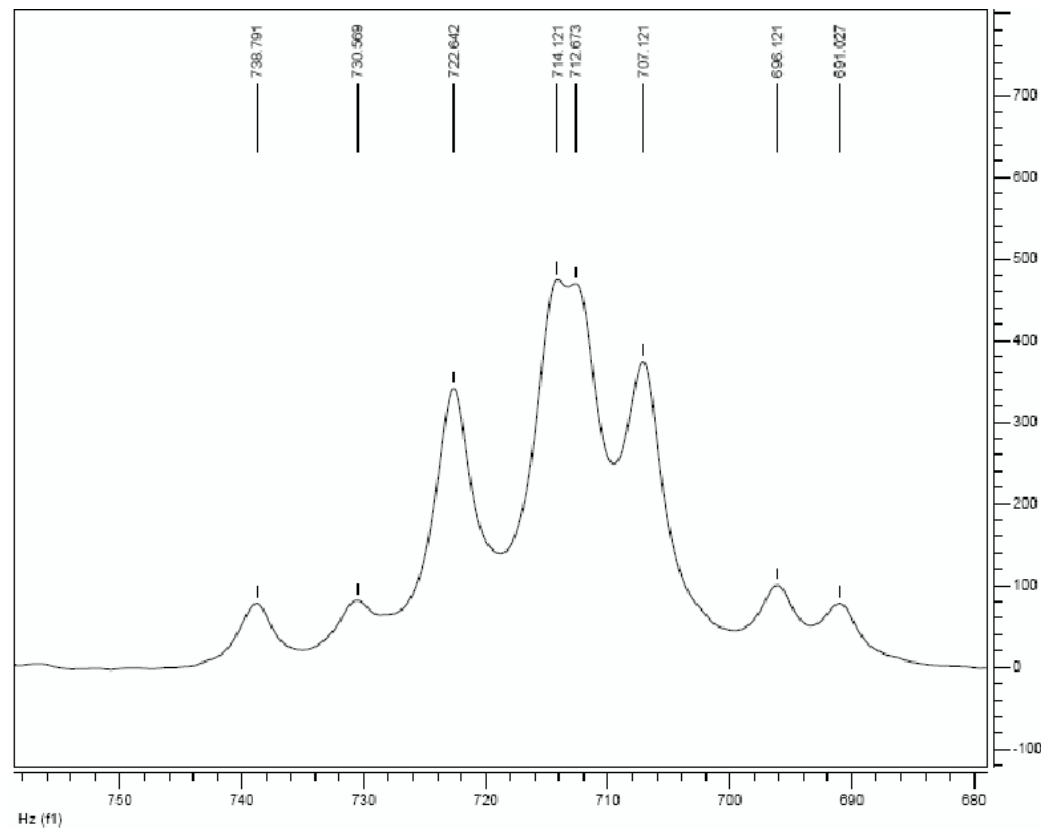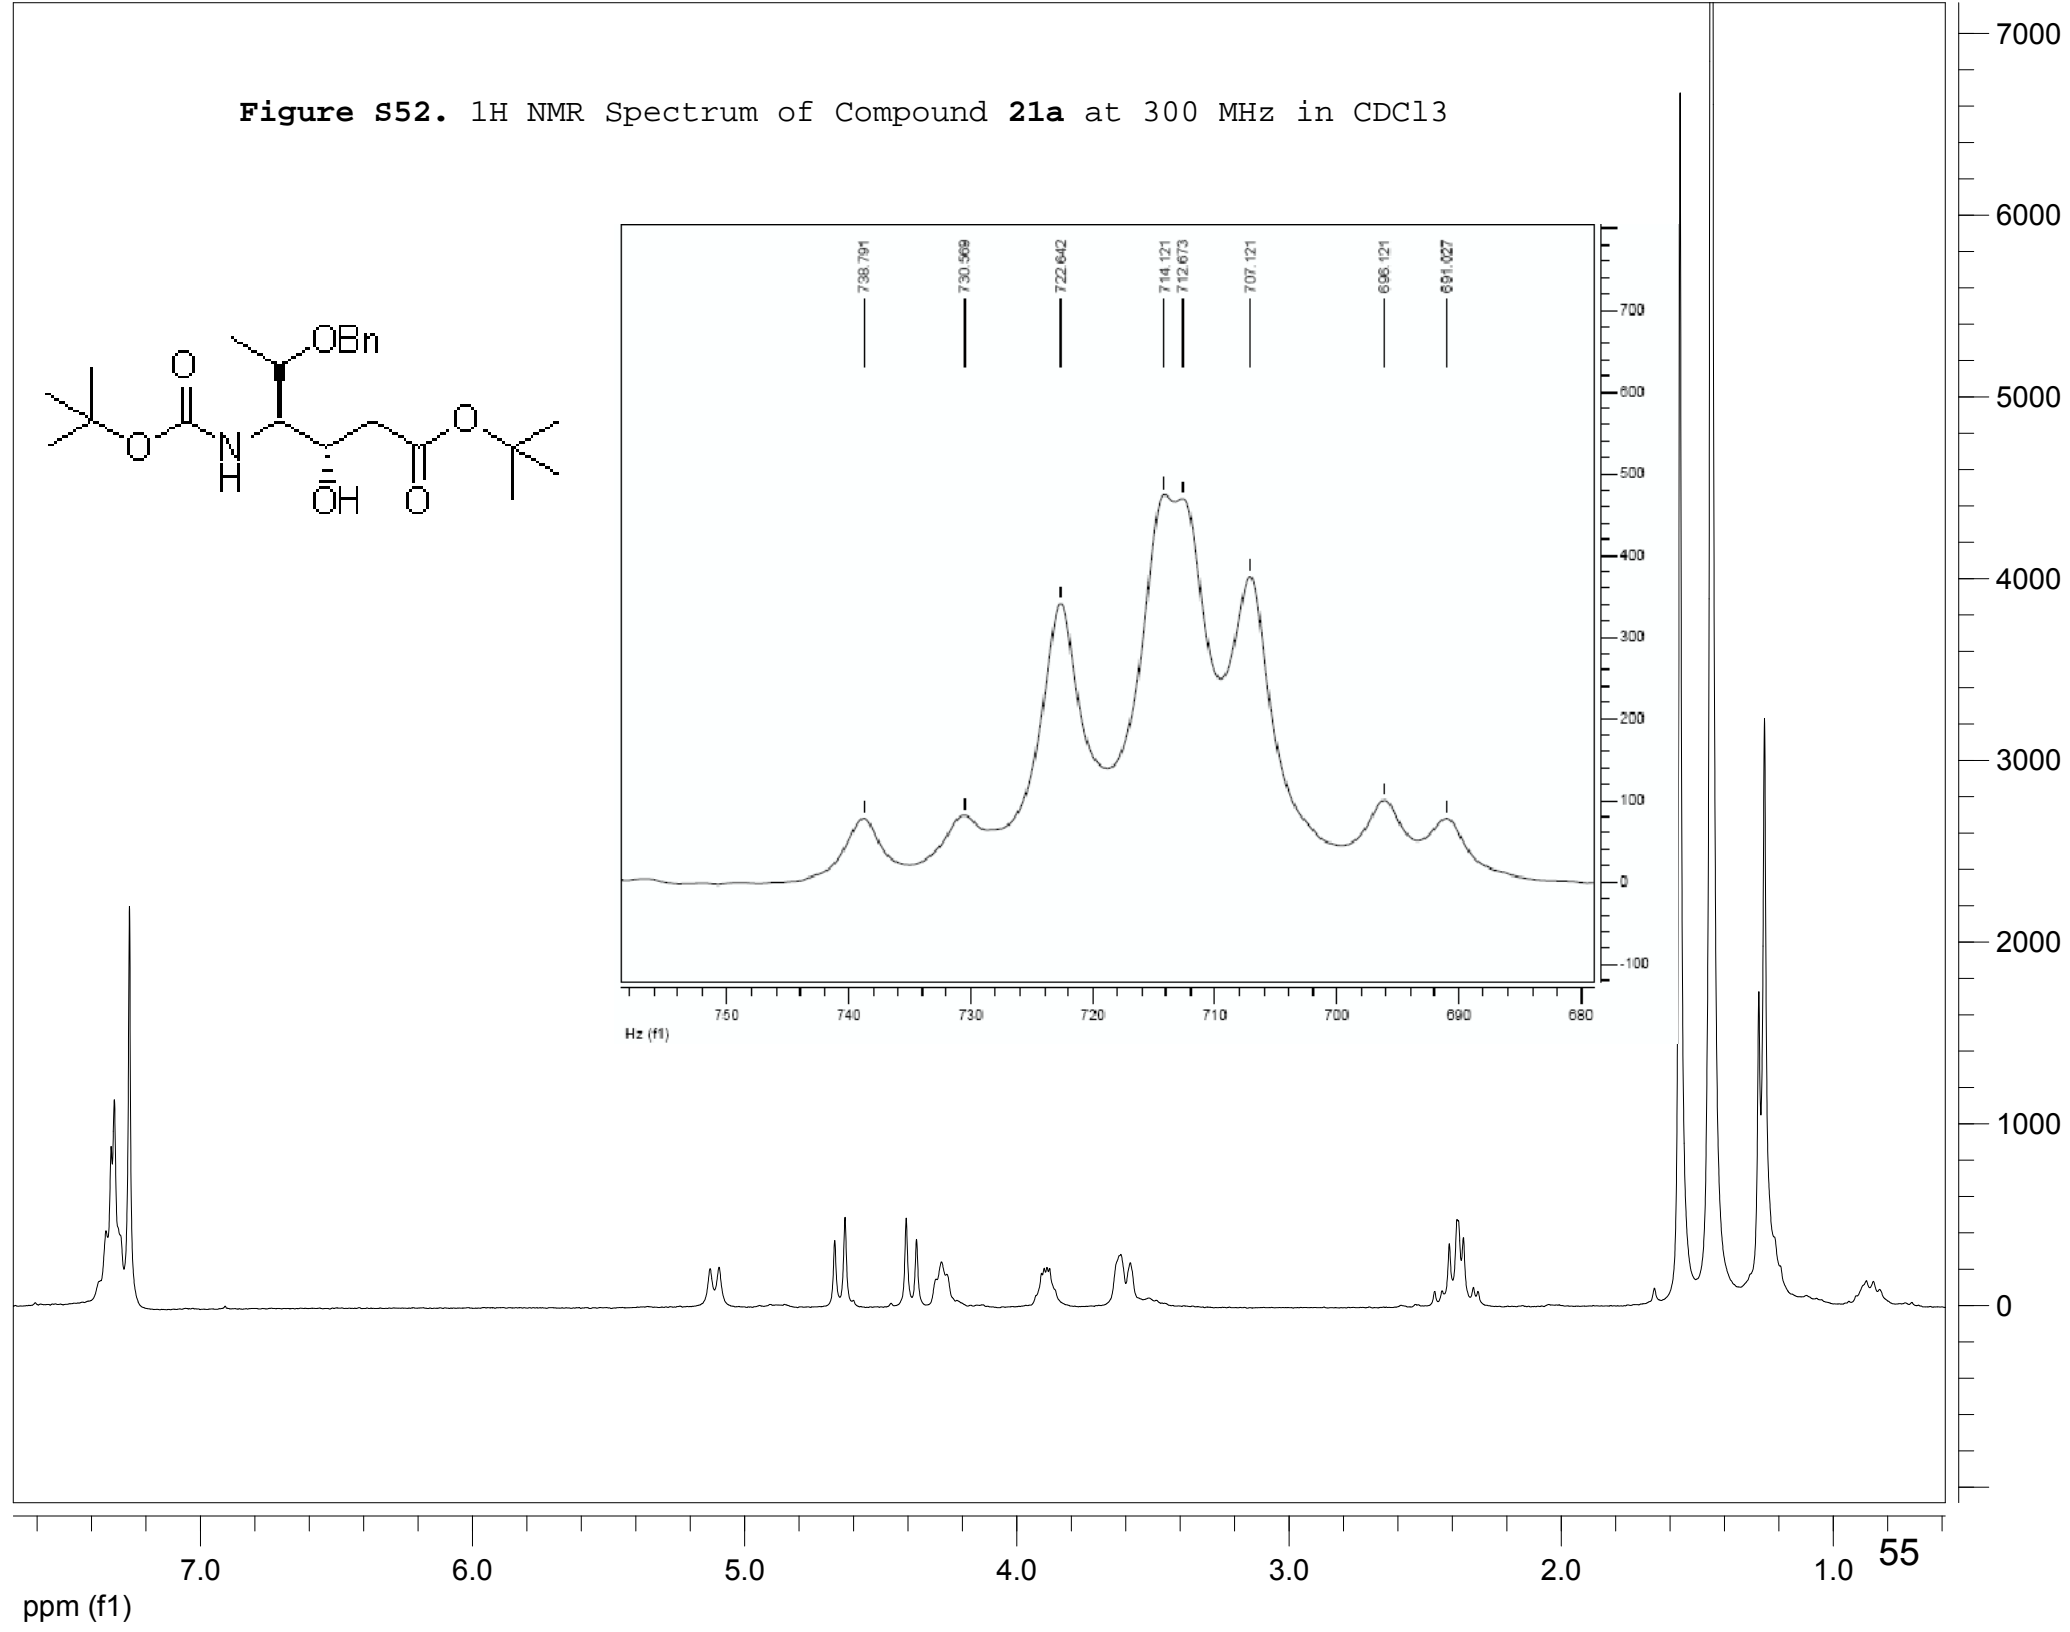

Figure S53. <sup>1</sup>H NMR Spectrum of Compound 21b at 300 MHz in CDCl<sub>3</sub>

compound 21b

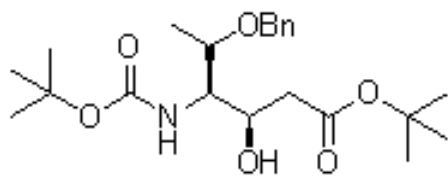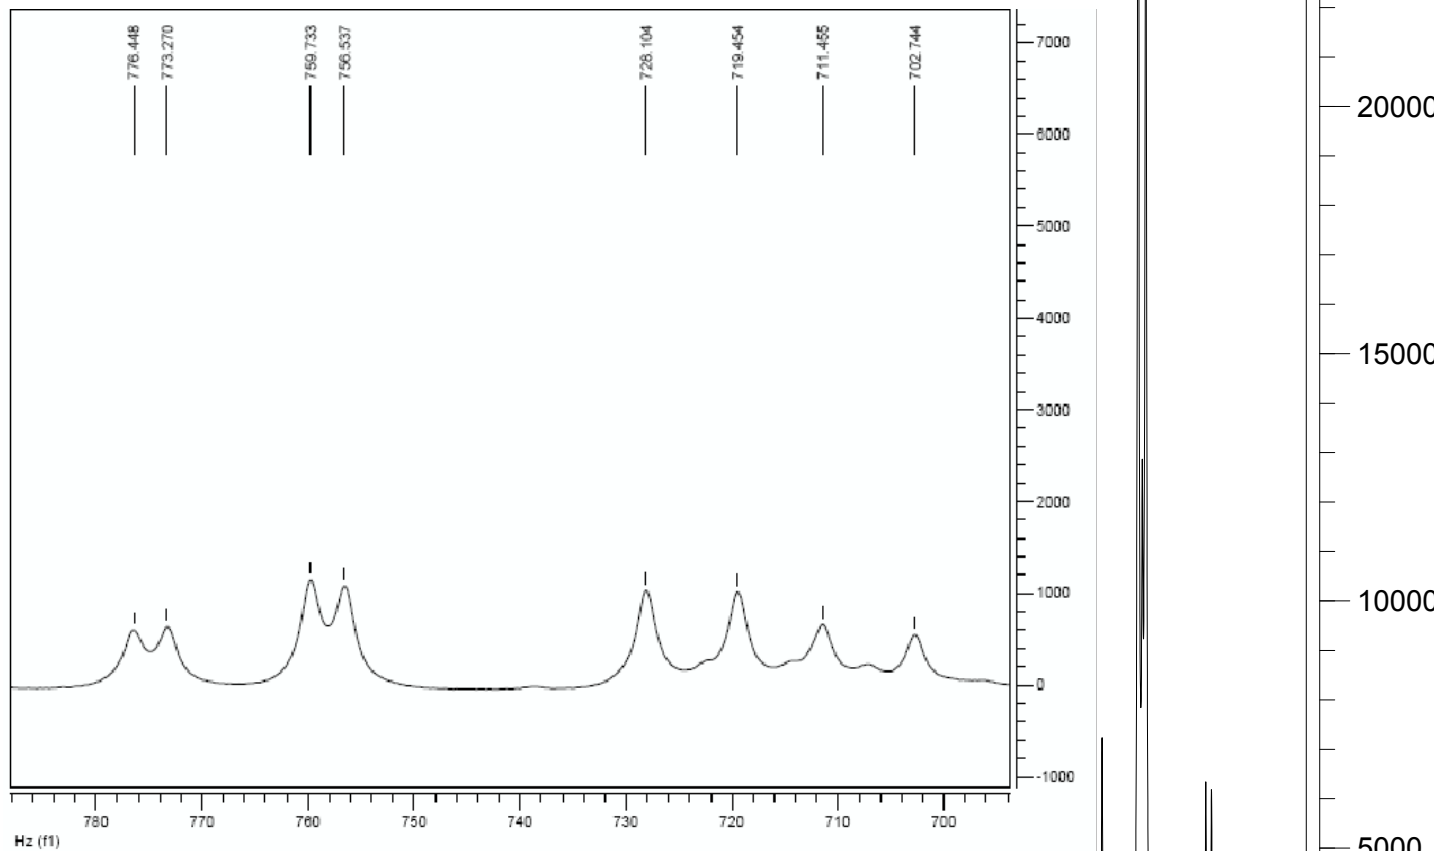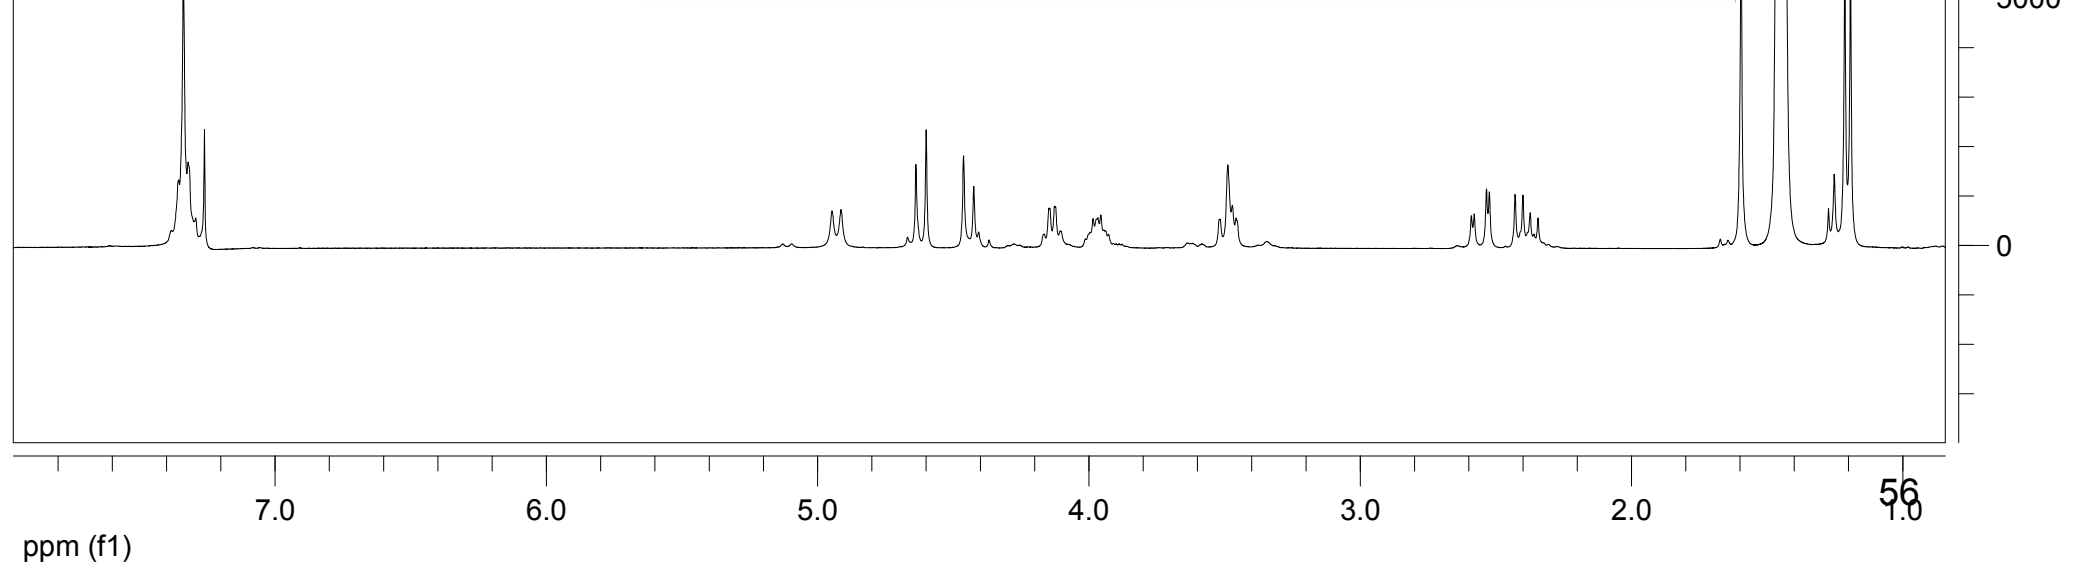



Figure S54. <sup>1</sup>H NMR Spectrum of Compound **21c** at 300 MHz in CDCl<sub>3</sub>

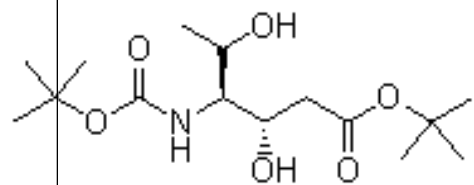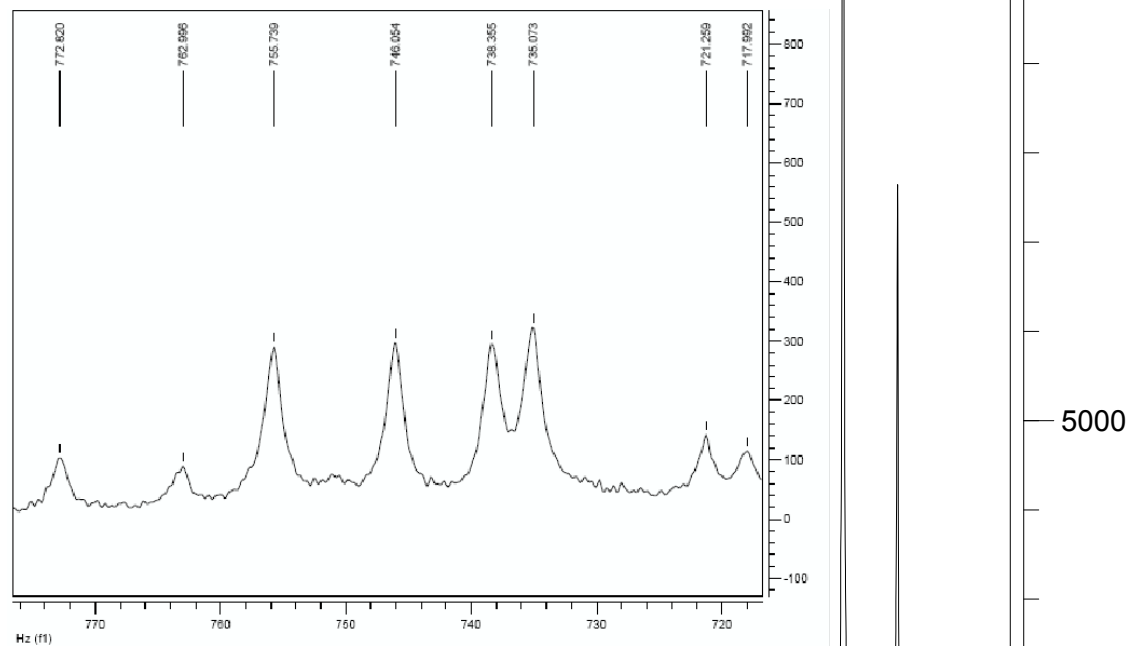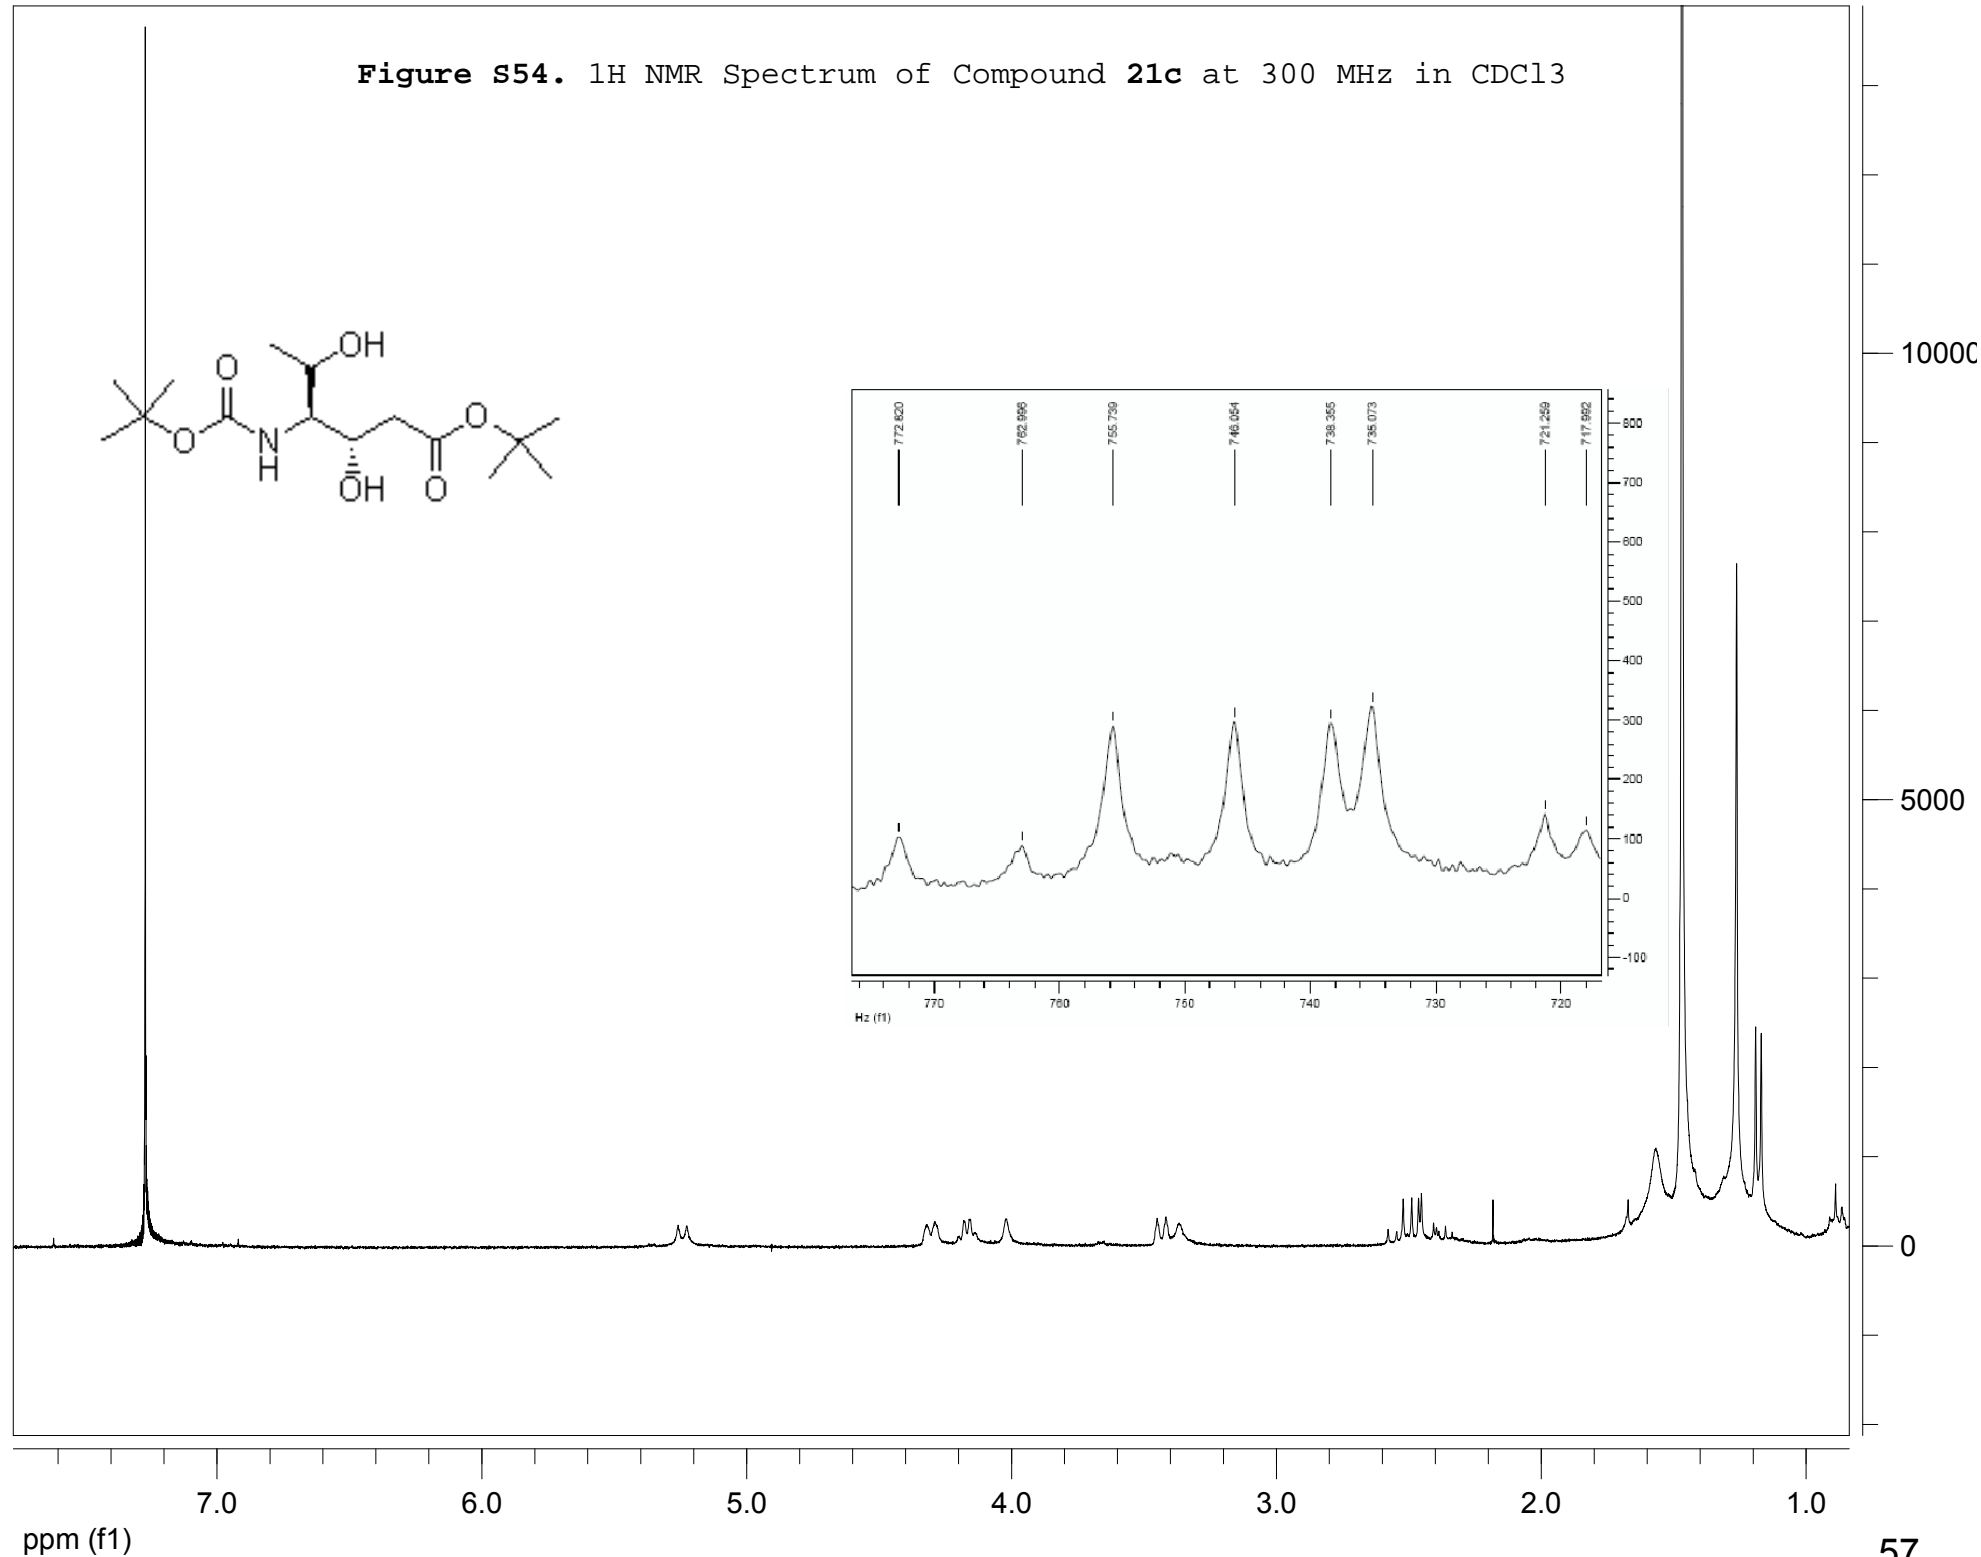

Figure S55. <sup>1</sup>H NMR Spectrum of Compound **21d** at 300 MHz in CDCl<sub>3</sub>

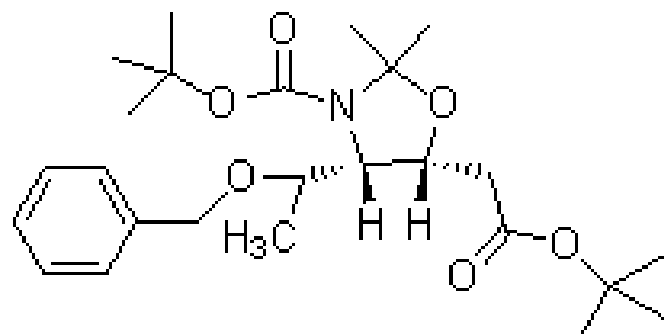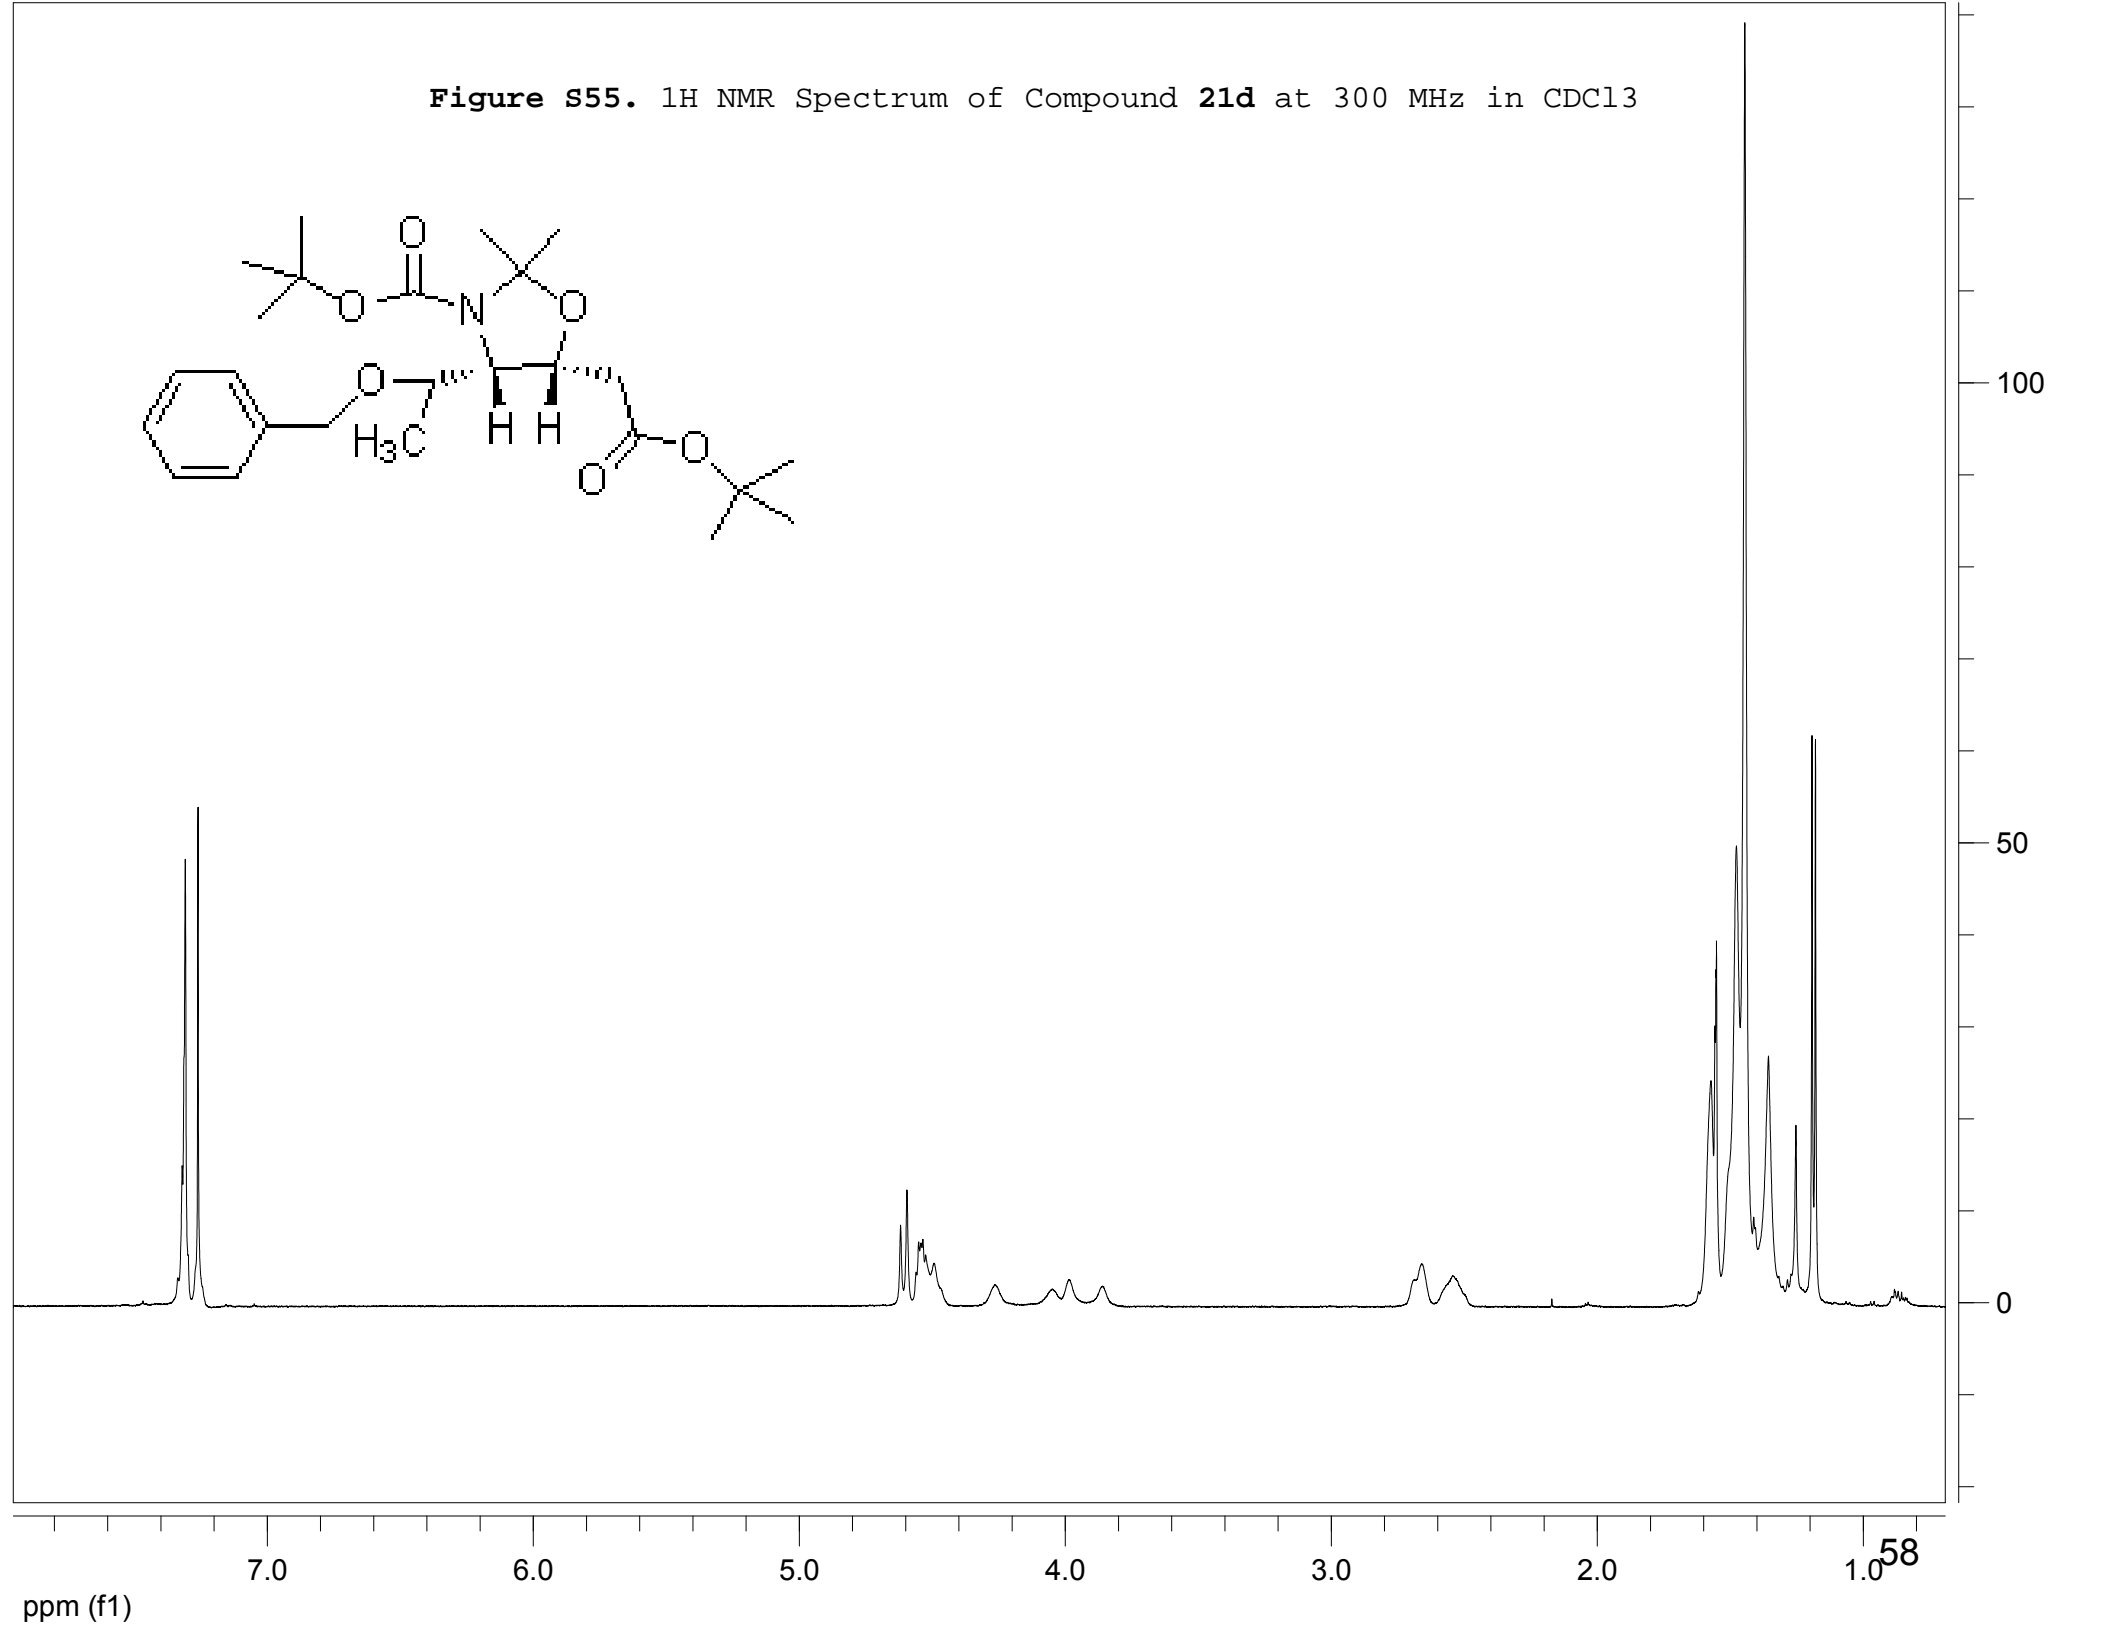

Figure S56. <sup>1</sup>H NMR Spectrum of Compound **22a** at 300 MHz in CDCl<sub>3</sub>

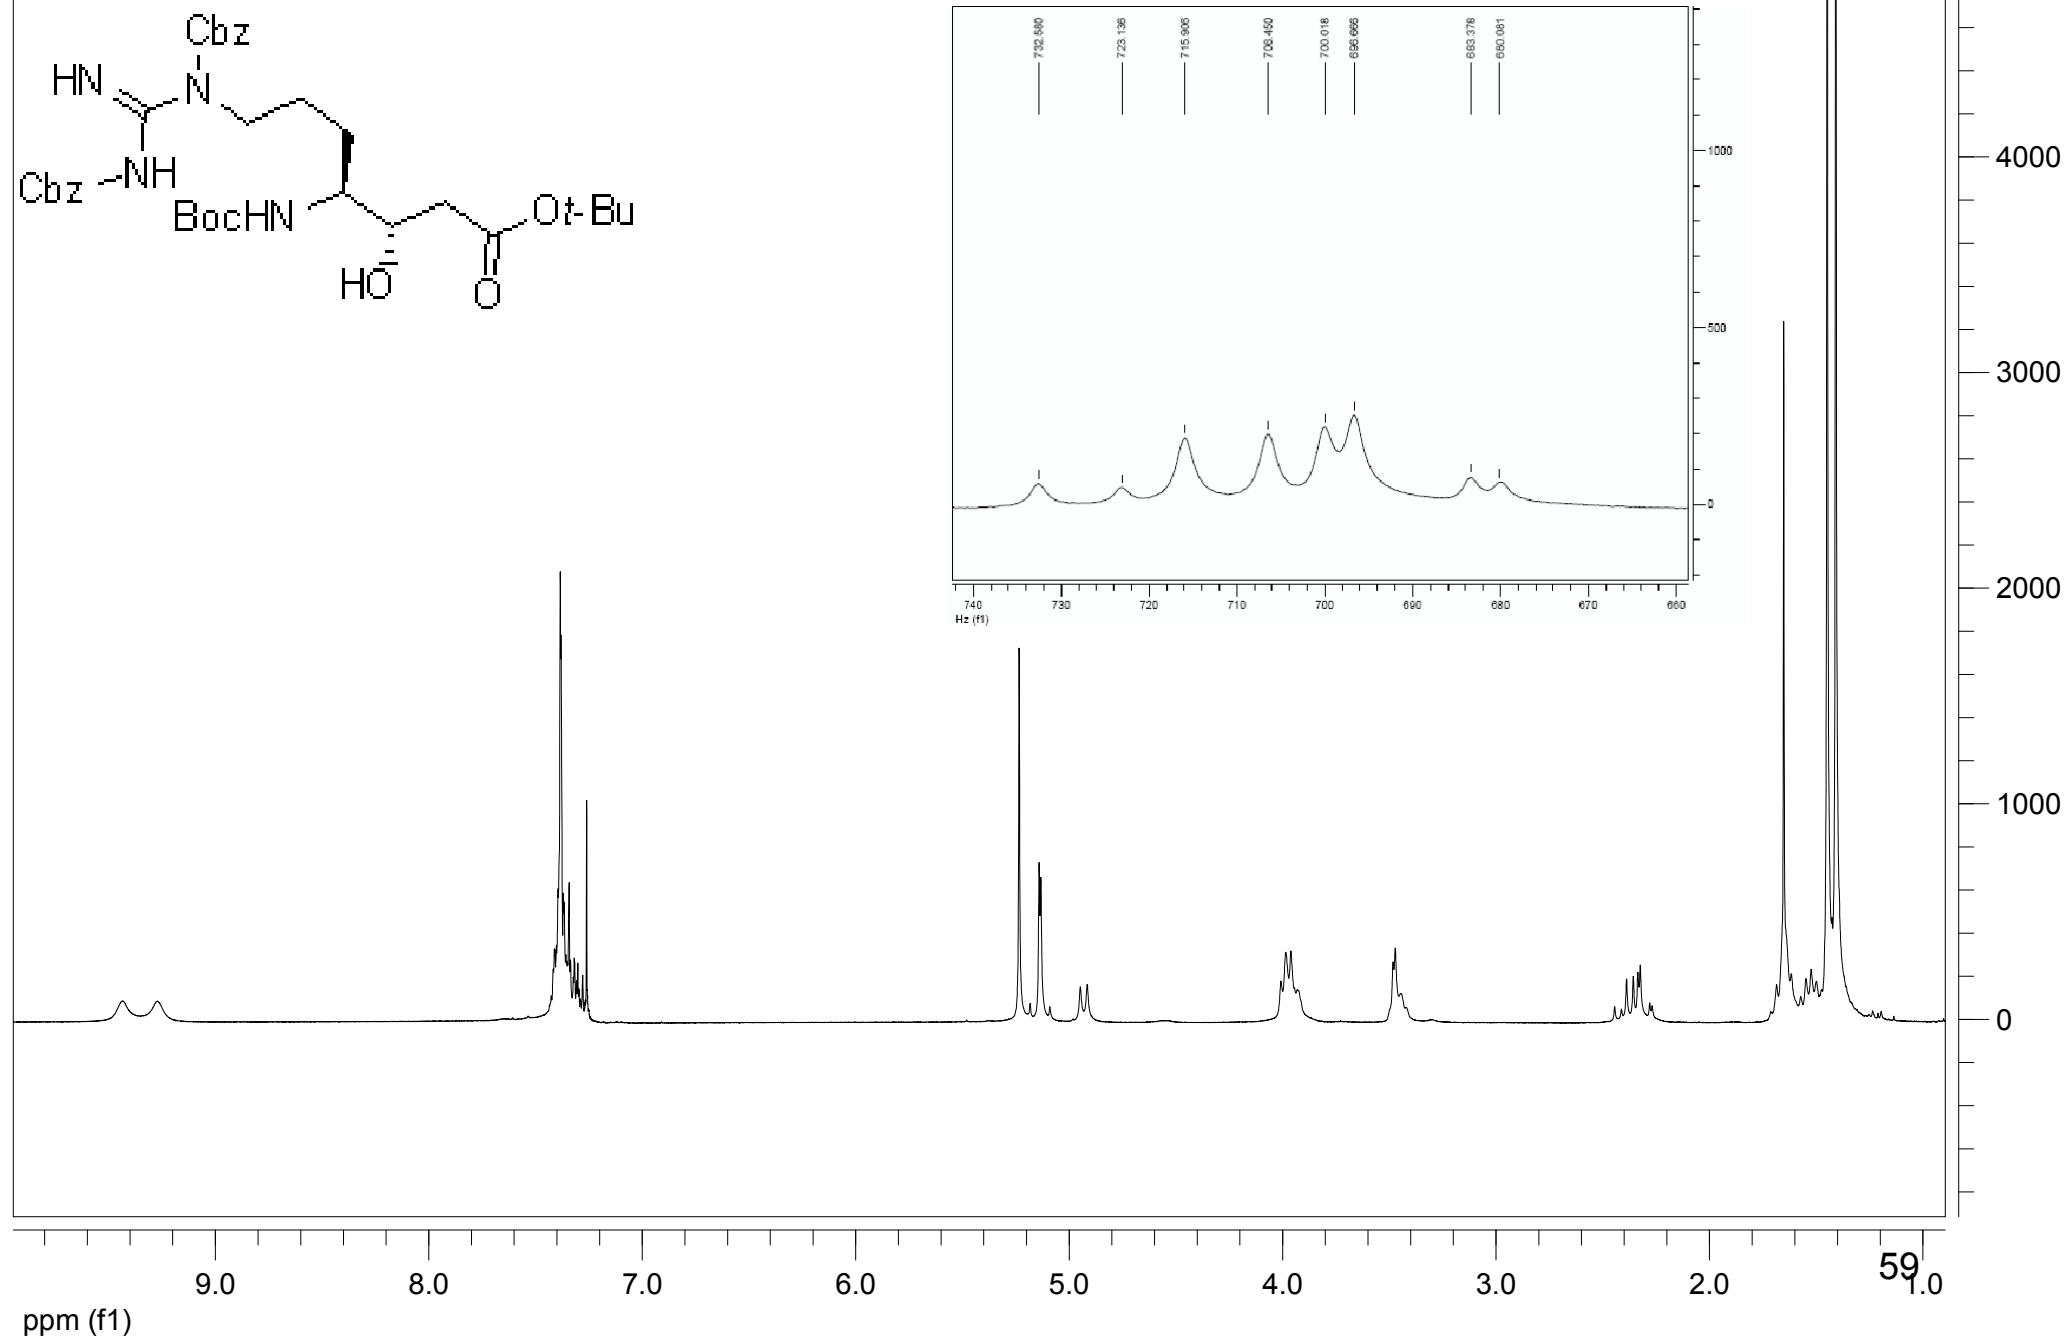

Figure S57. <sup>1</sup>H NMR Spectrum of Compound **22b** at 300 MHz in CDCl<sub>3</sub>

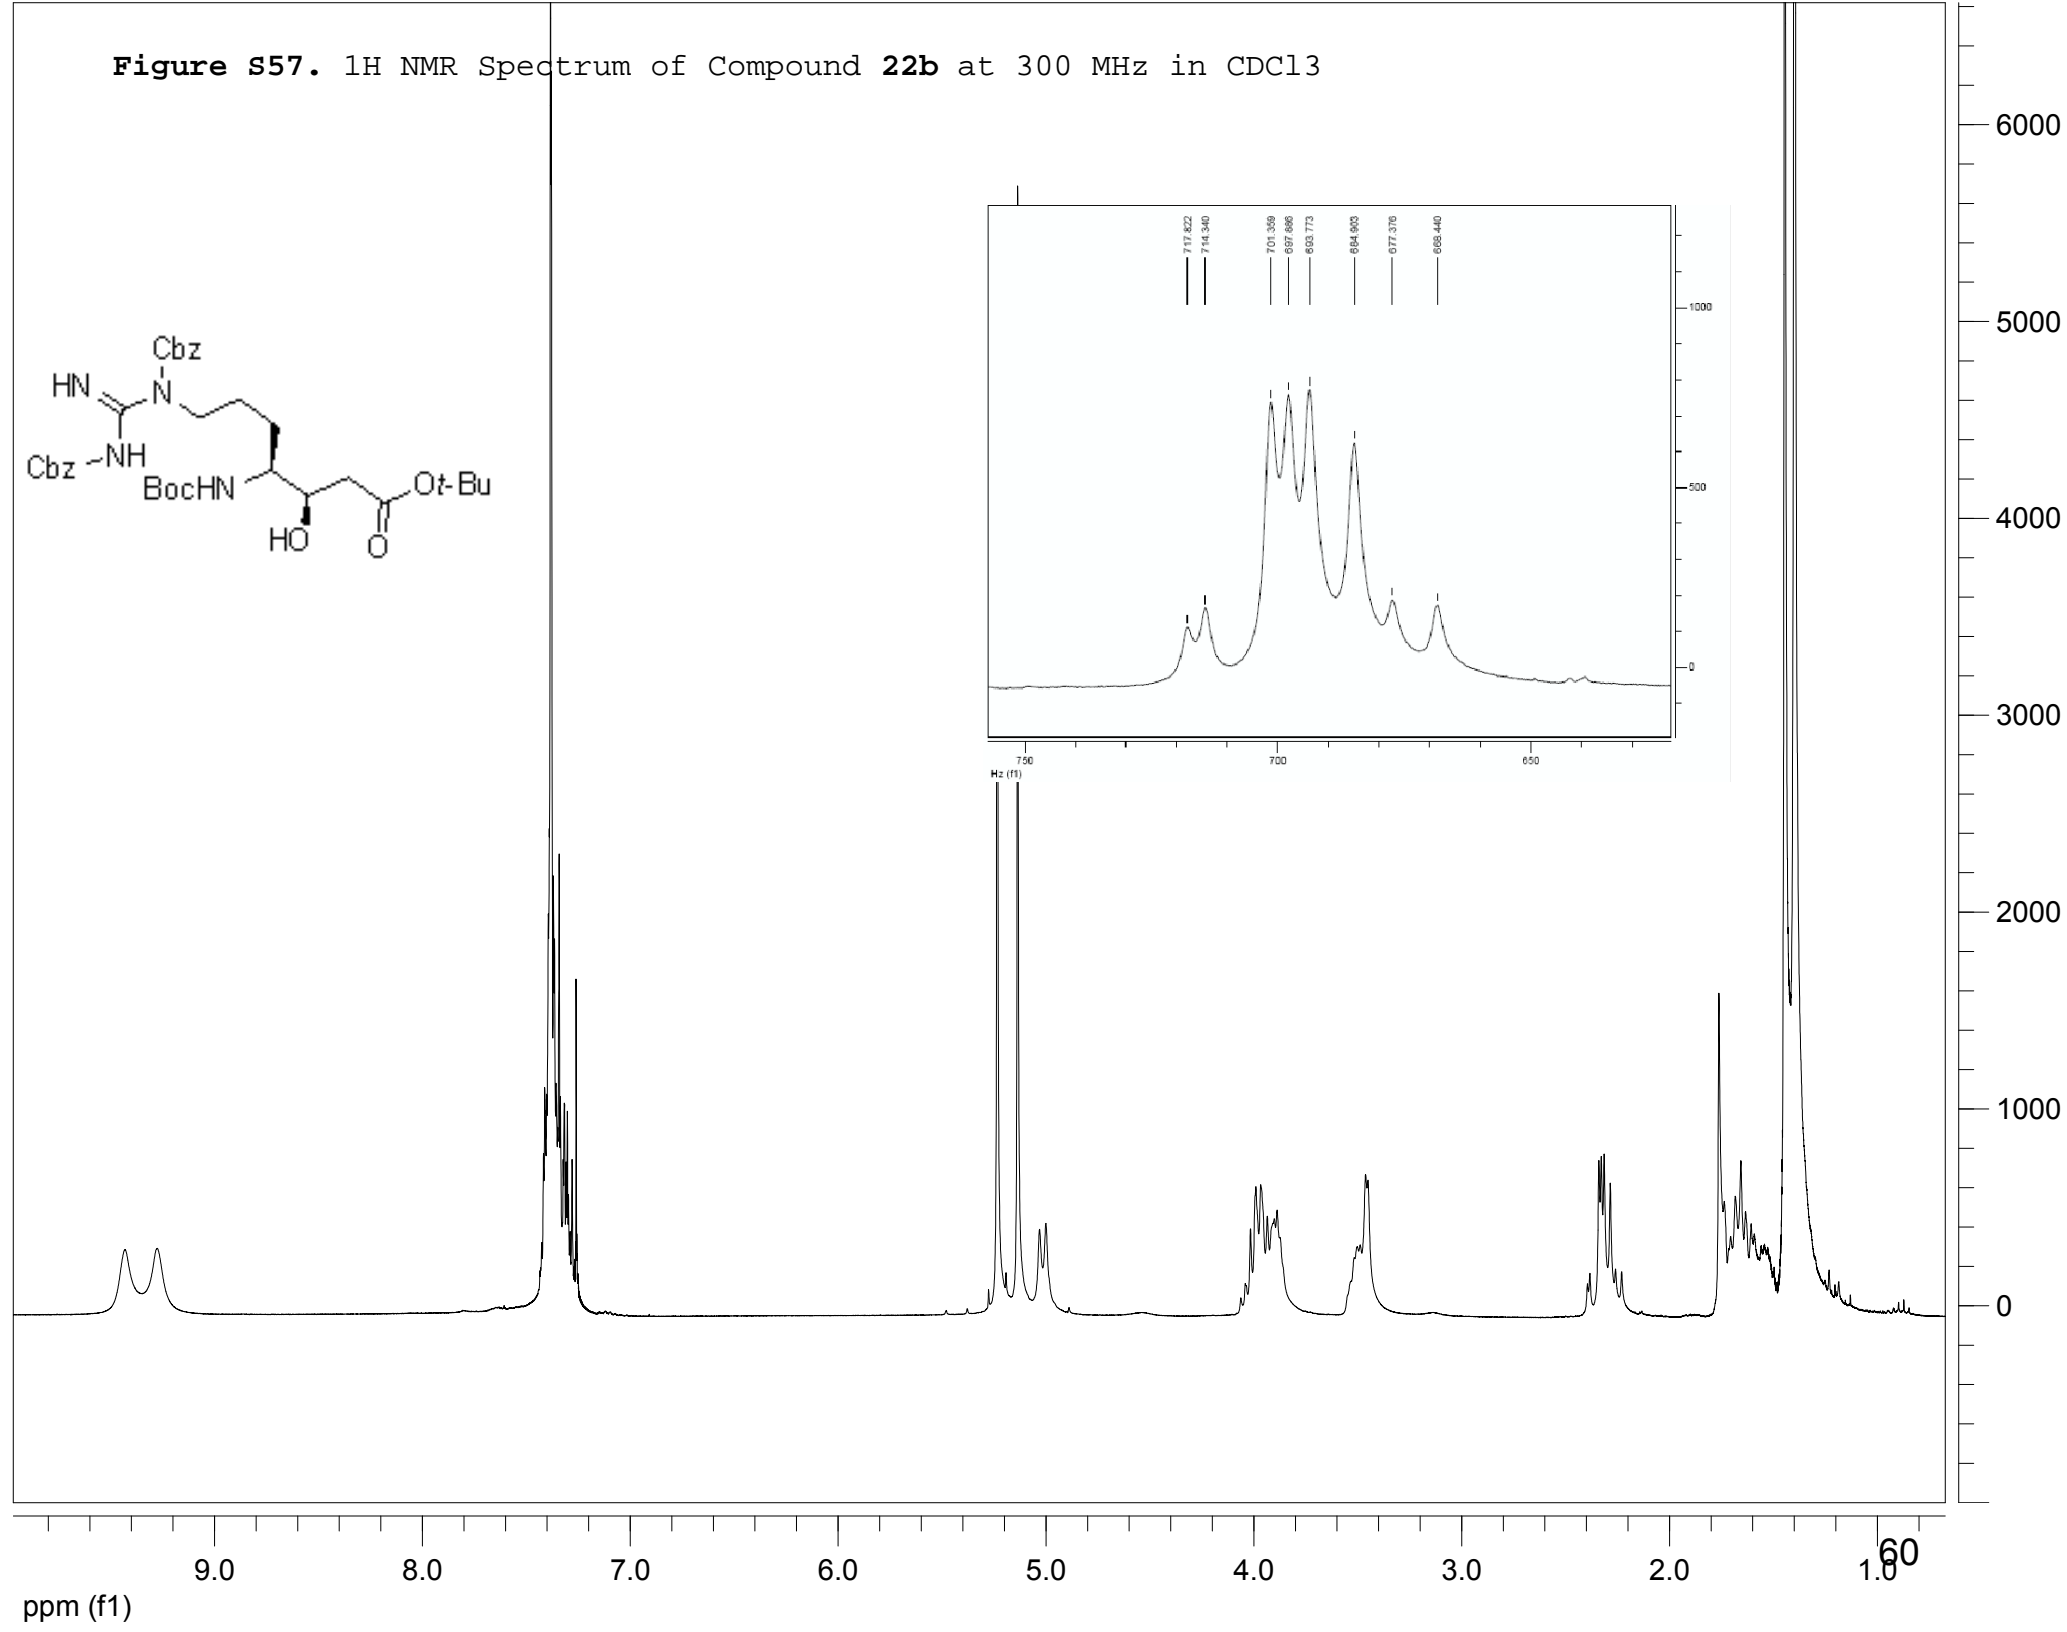

Figure S58. <sup>1</sup>H NMR Spectrum of Compound **22c** at 300 MHz in CDCl<sub>3</sub>

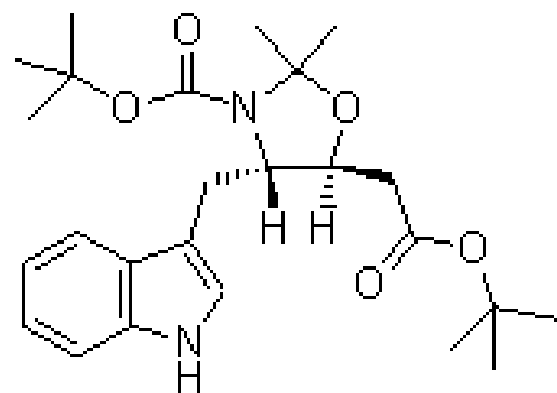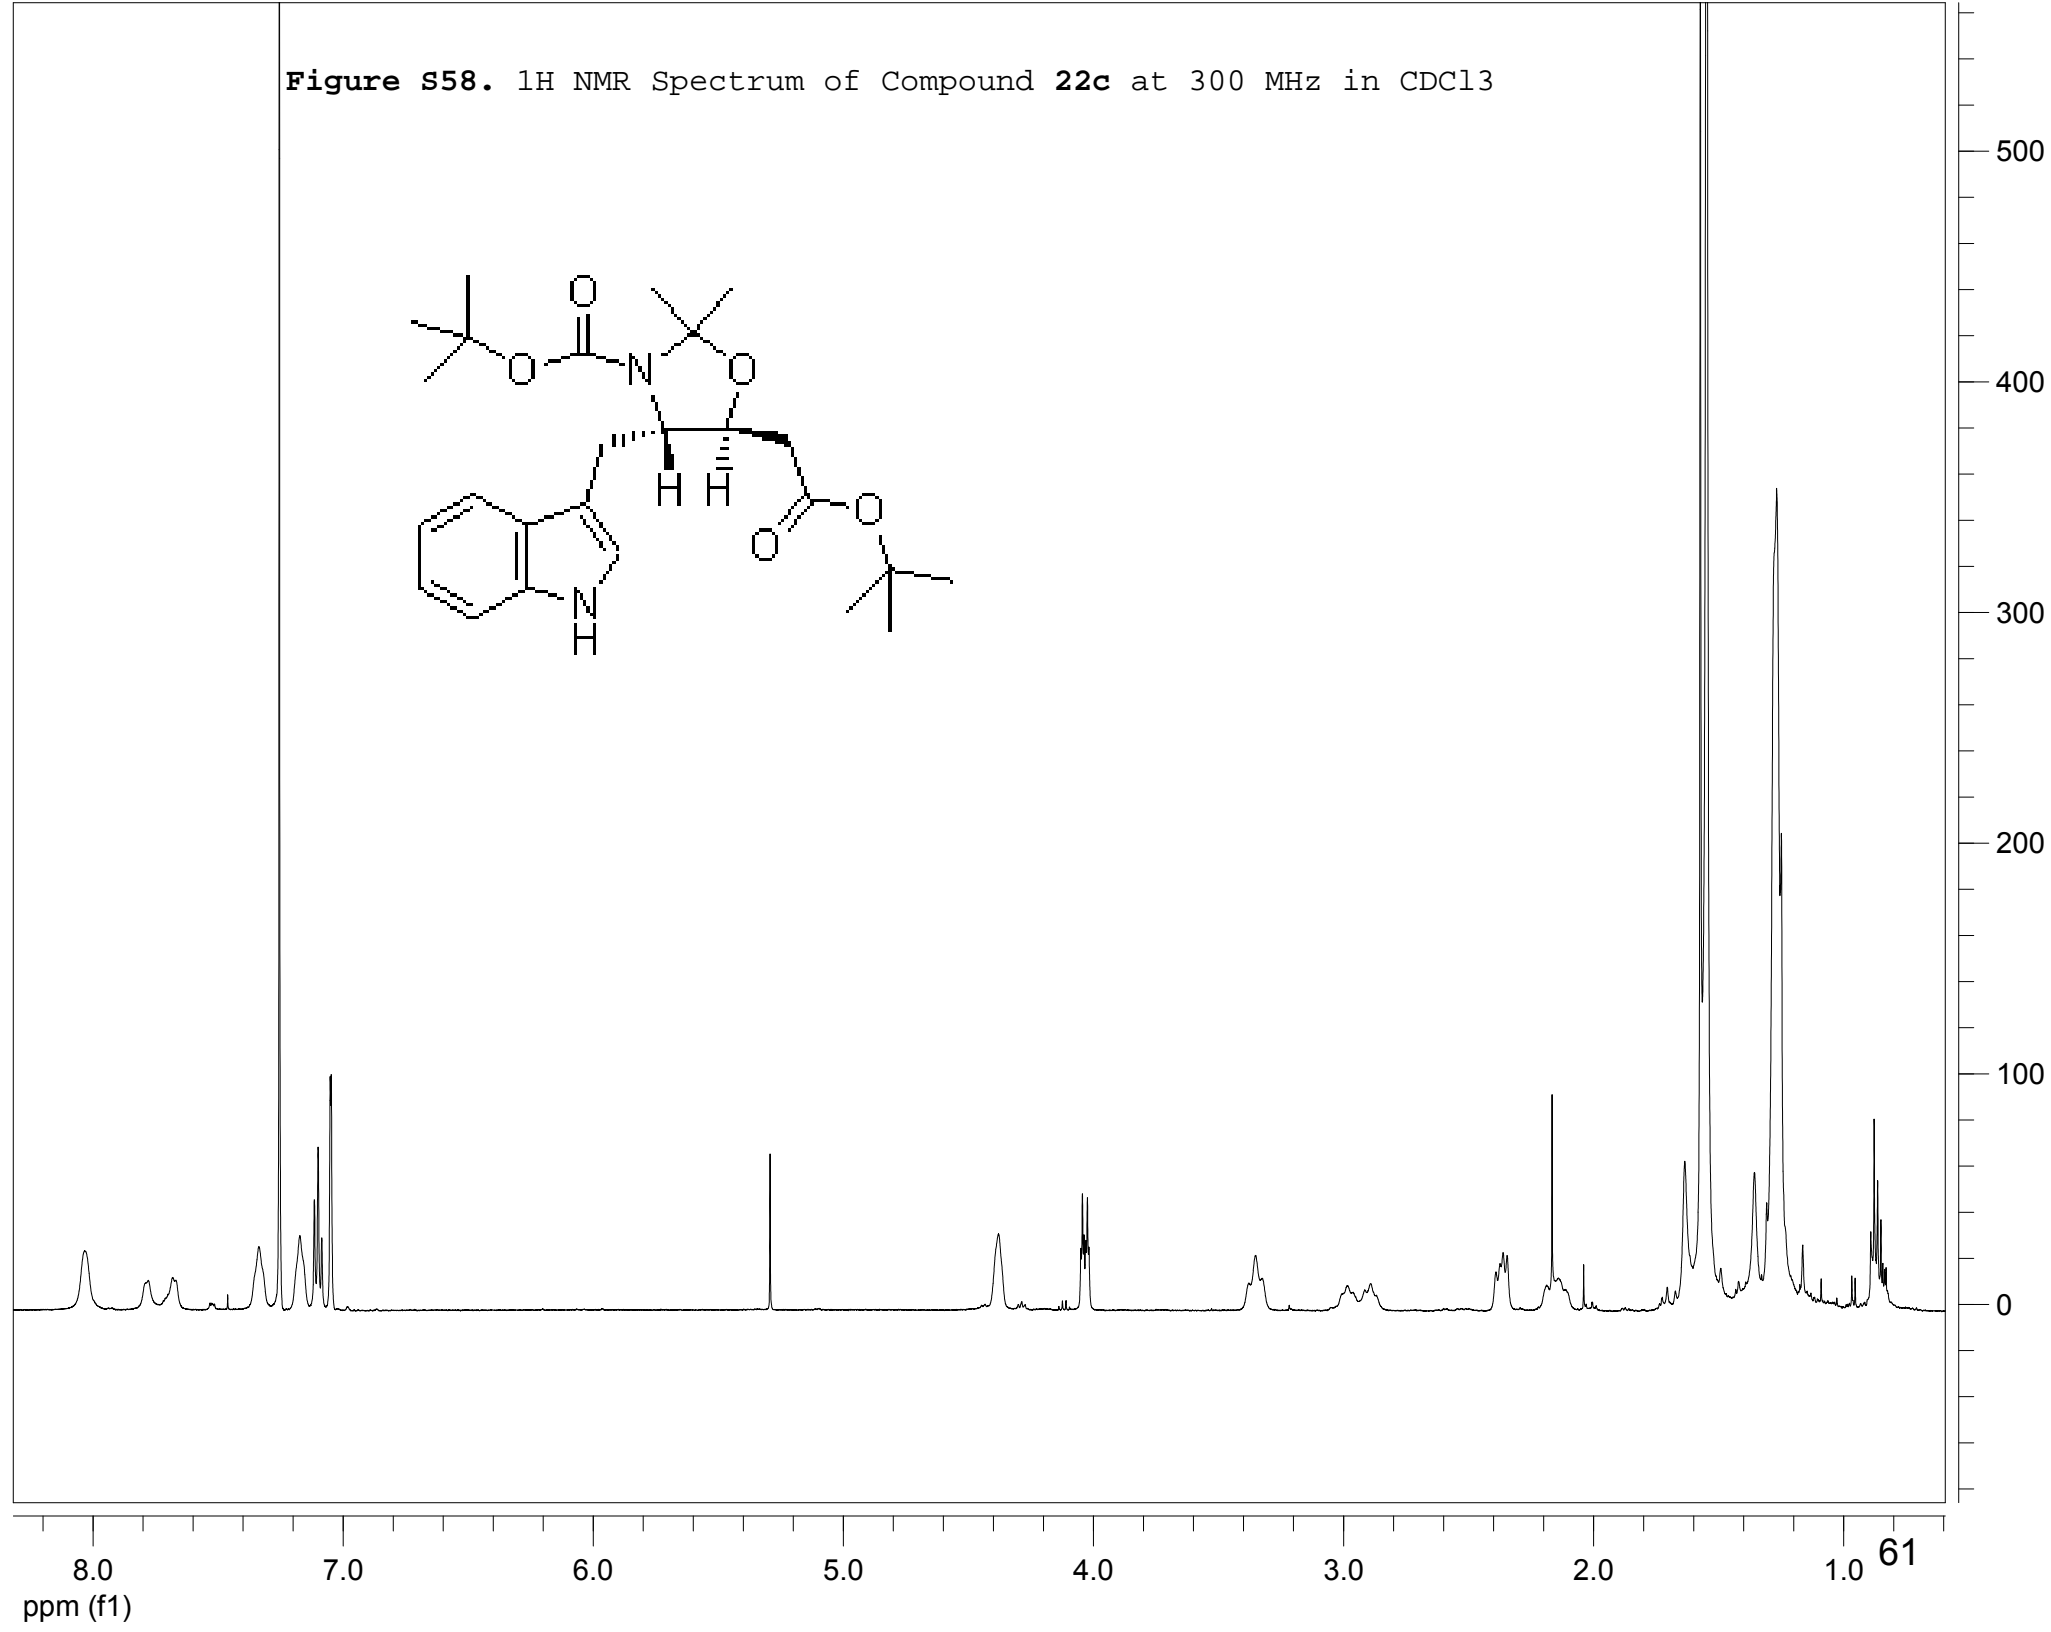

Figure S59. <sup>1</sup>H NMR Spectrum of Compound **23a** at 300 MHz in CDCl<sub>3</sub>

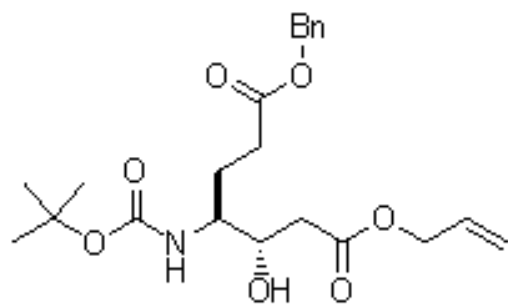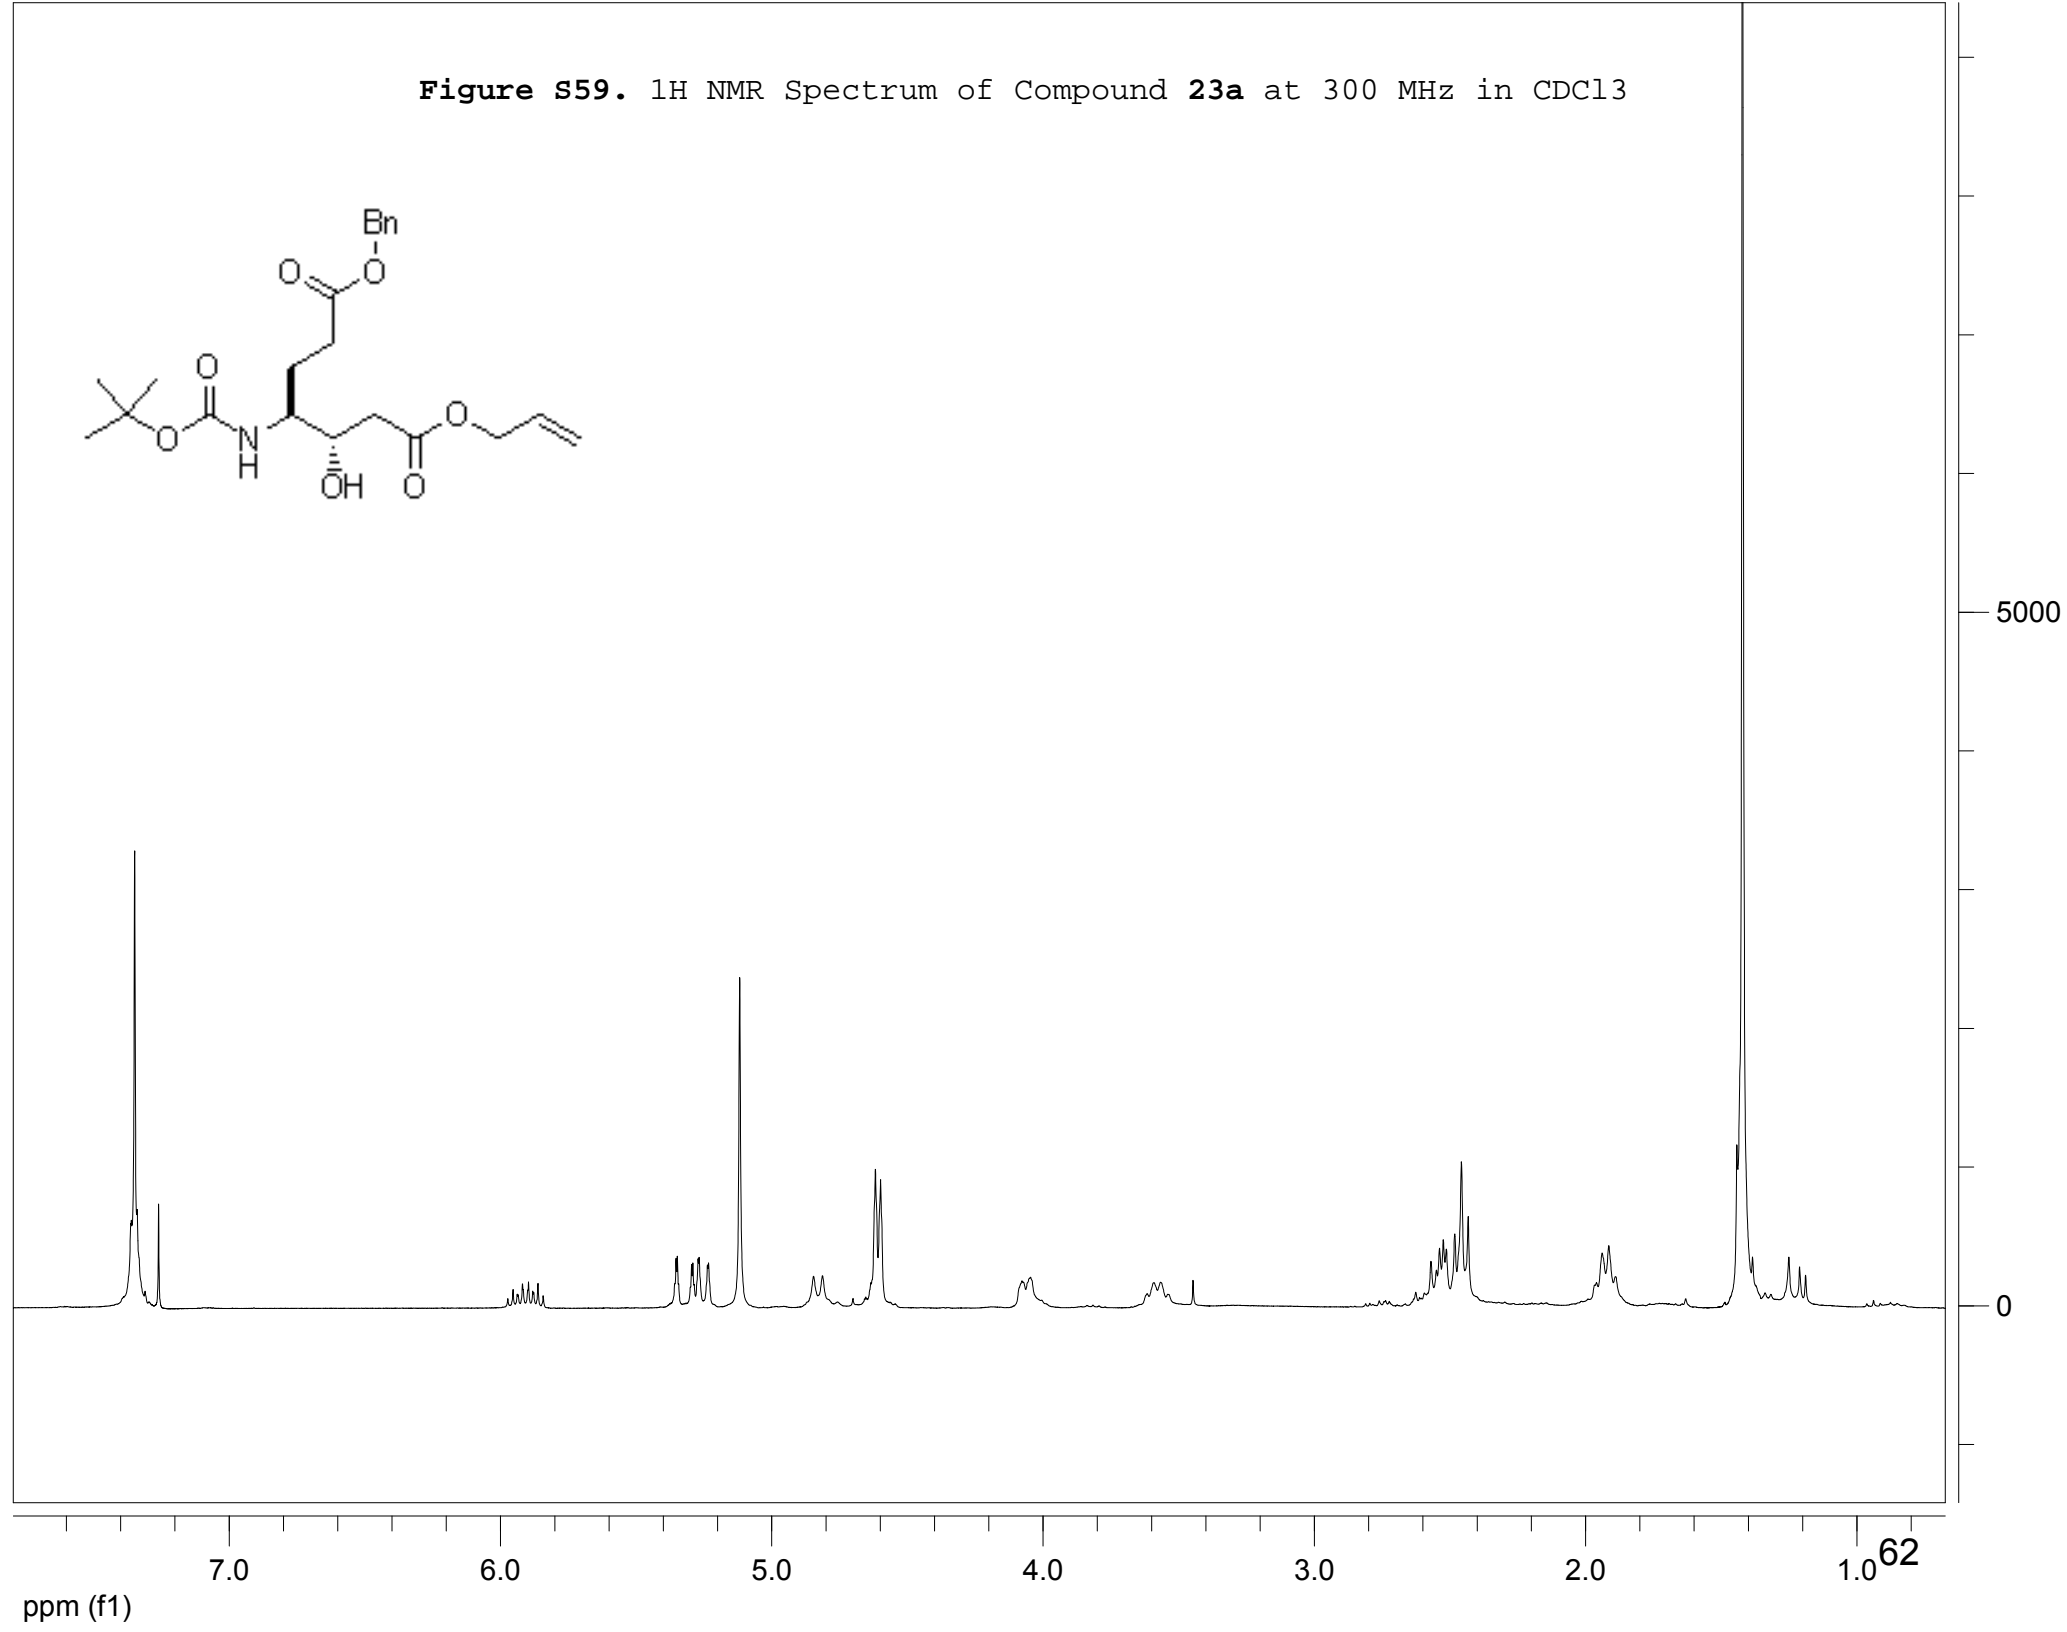

Figure S60. <sup>1</sup>H NMR Spectrum of Compound **23b** at 300 MHz in CDCl<sub>3</sub>

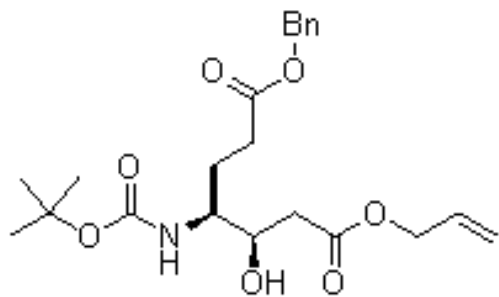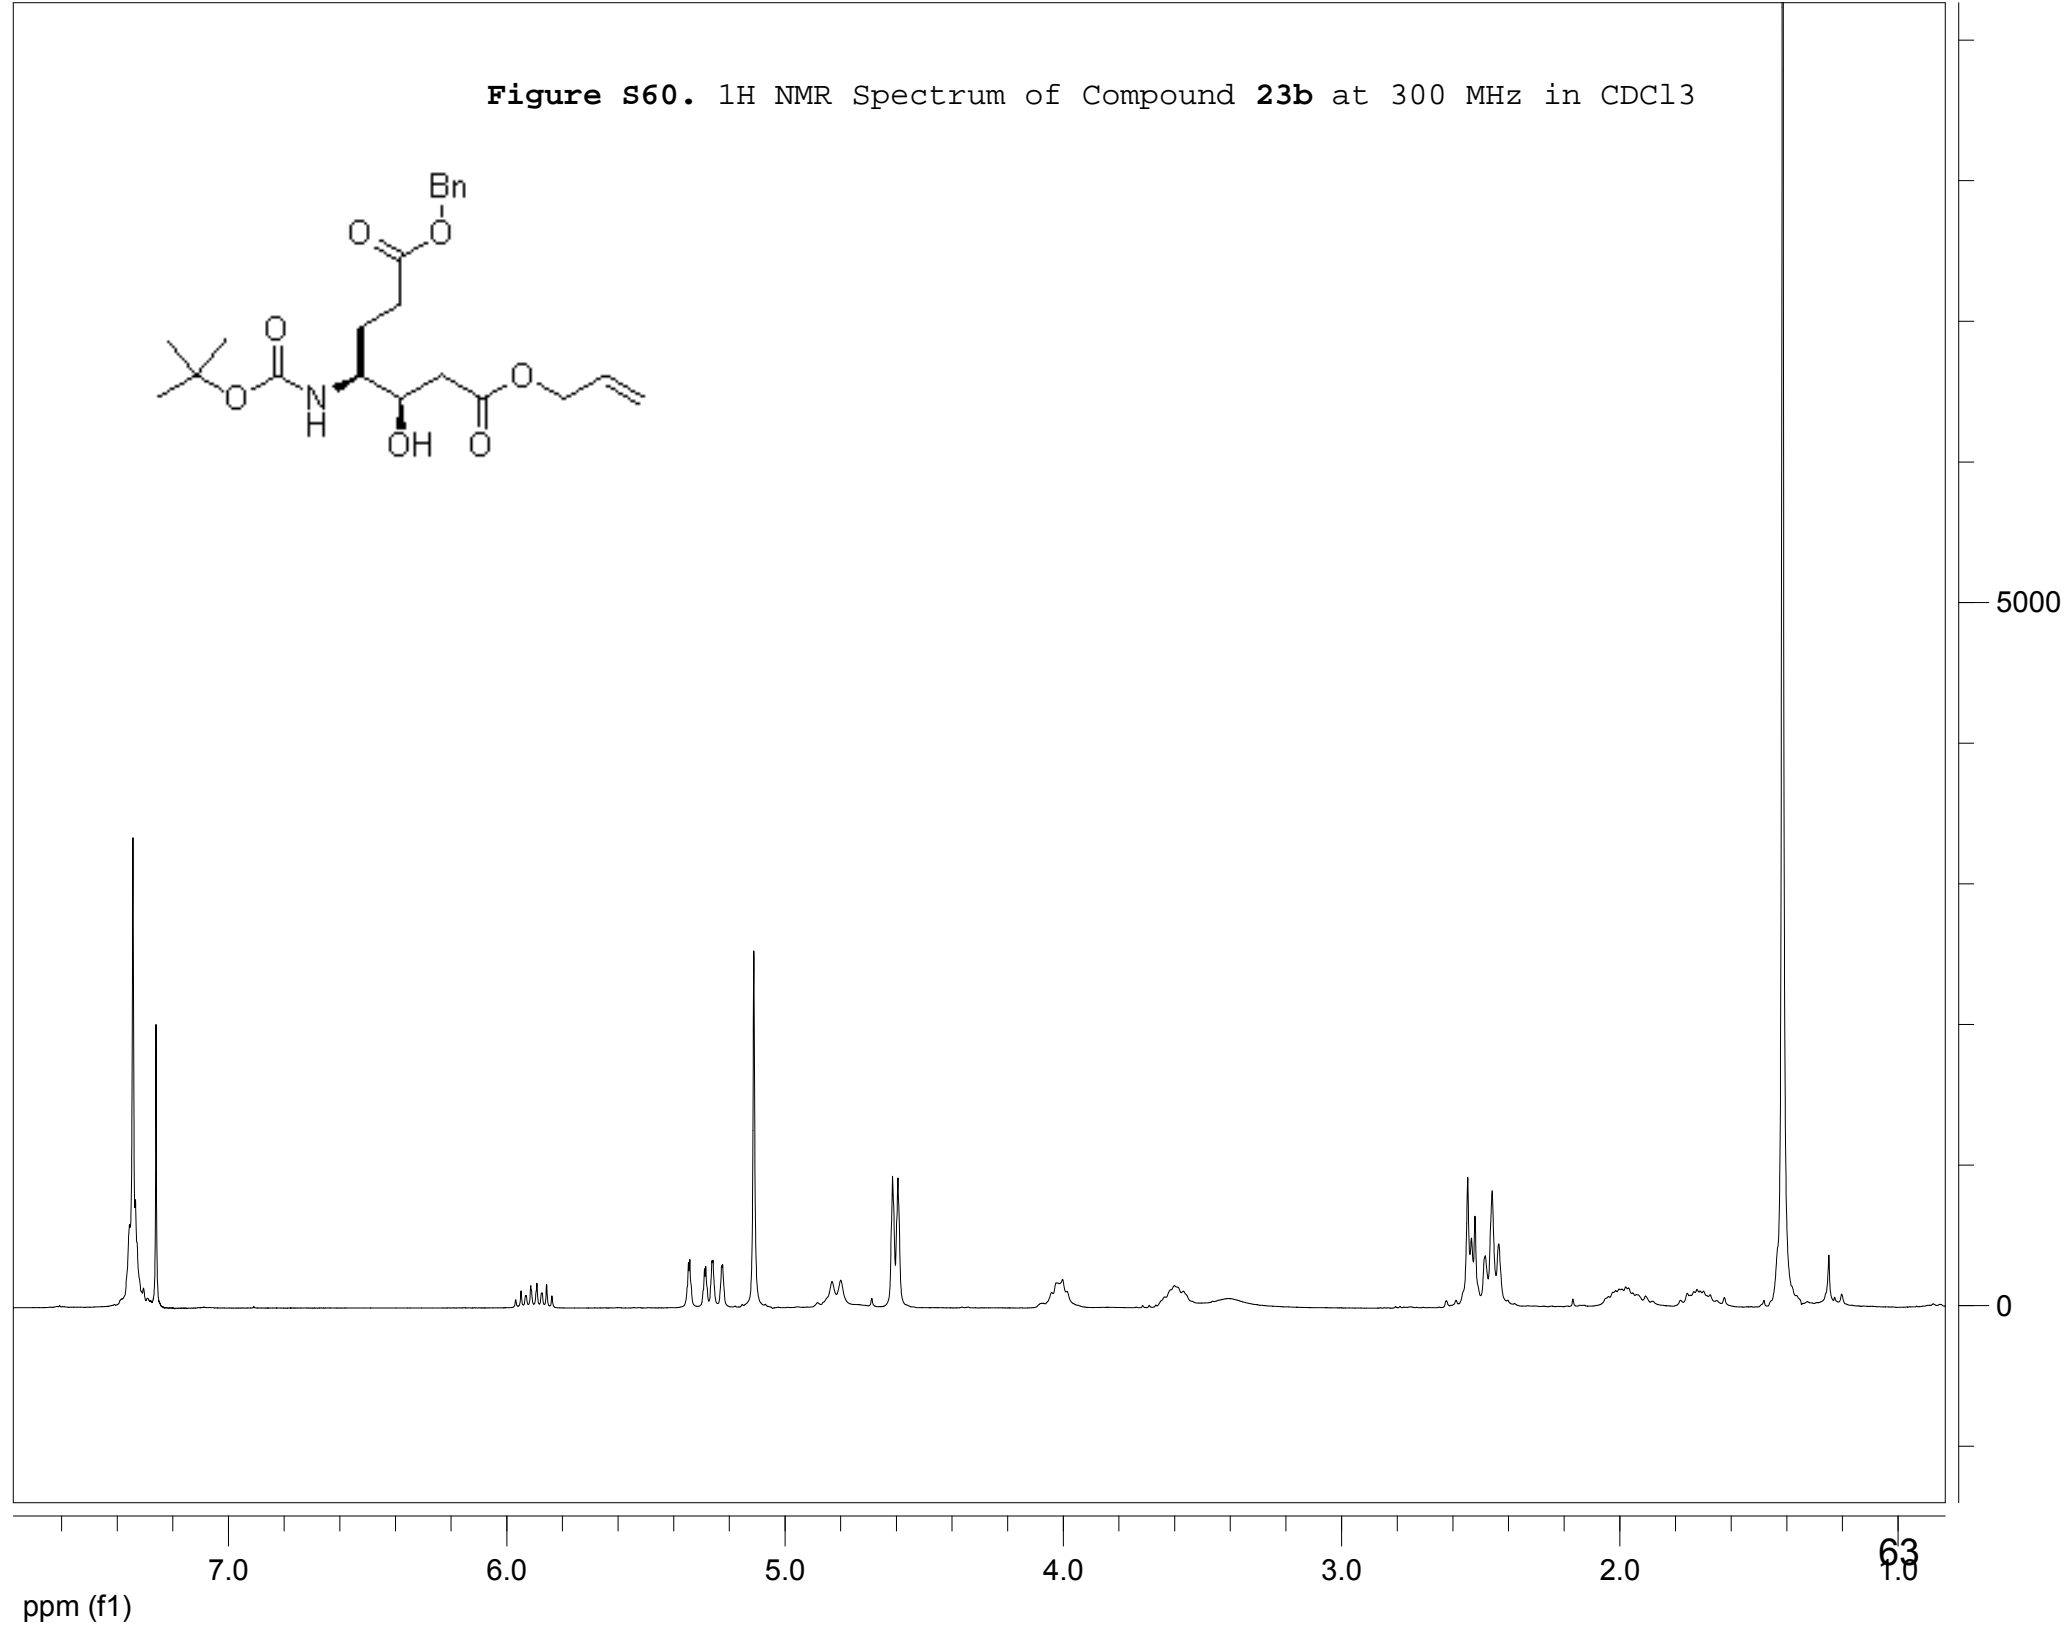

Figure S61. <sup>1</sup>H NMR Spectrum of Compound **24a** at 300 MHz in CDCl<sub>3</sub>

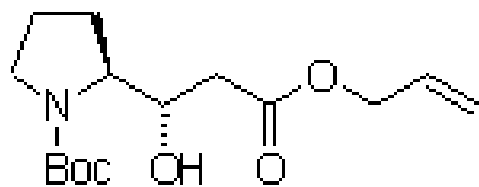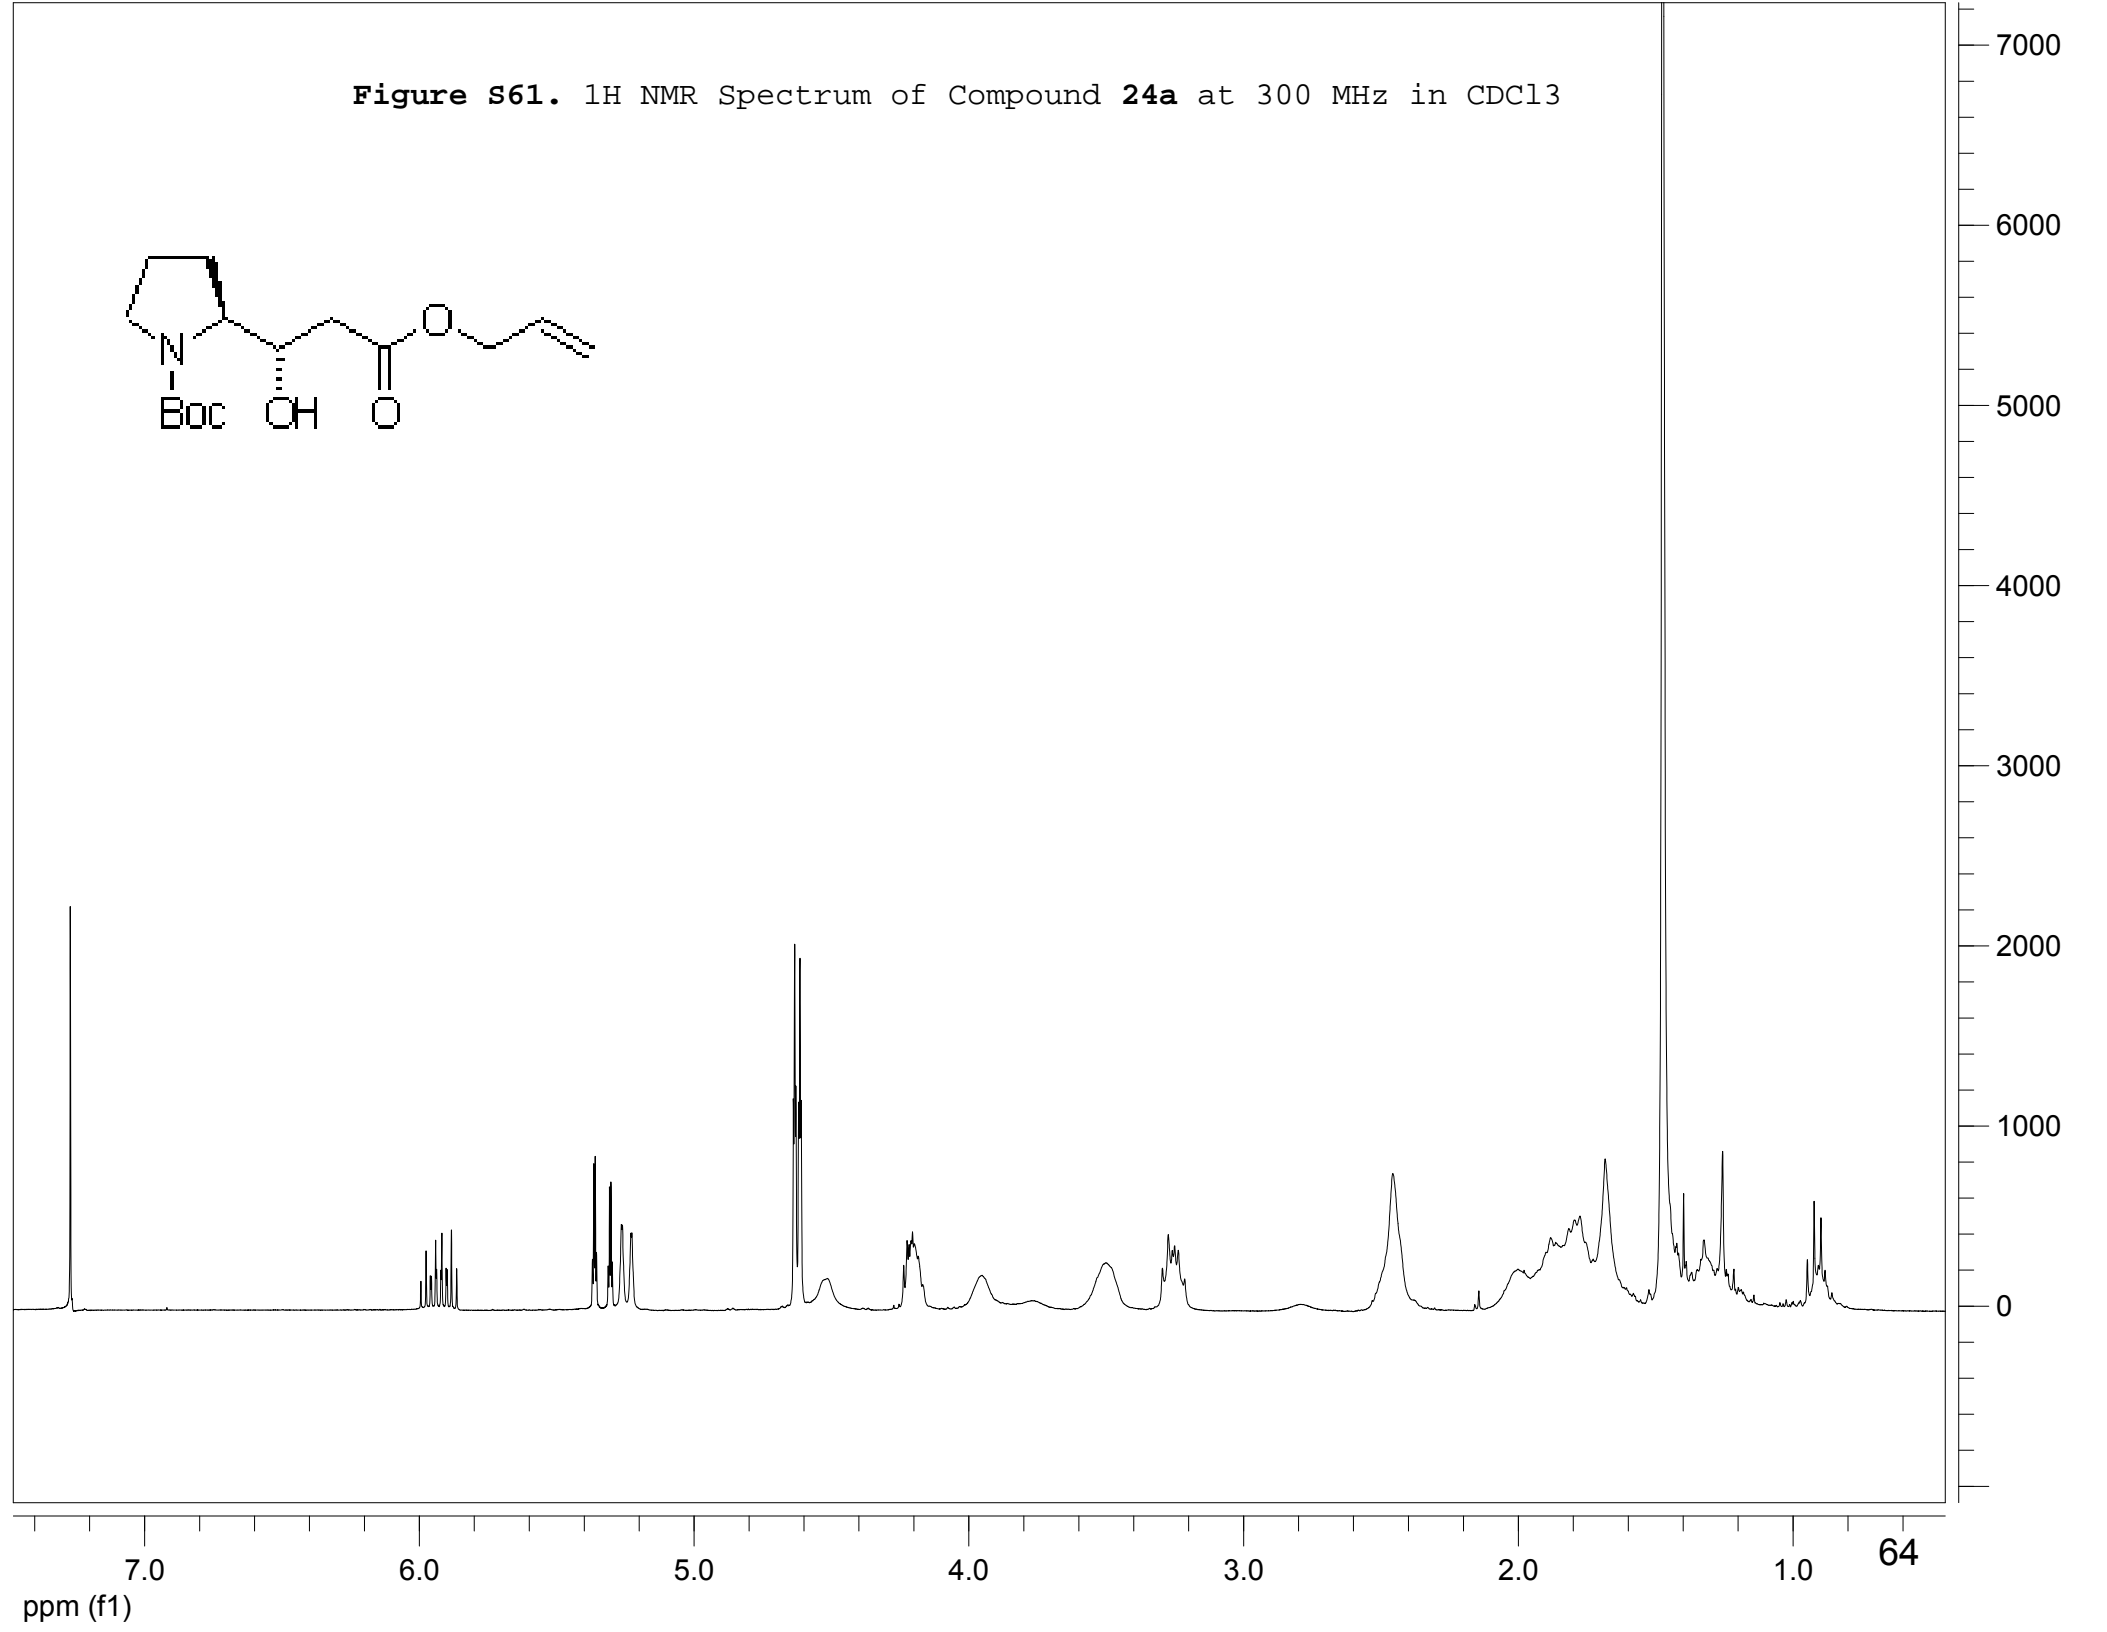



Figure S62. <sup>1</sup>H NMR Spectrum of Compound **24b** at 300 MHz in CDCl<sub>3</sub>

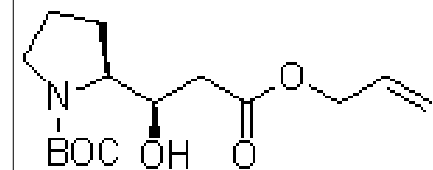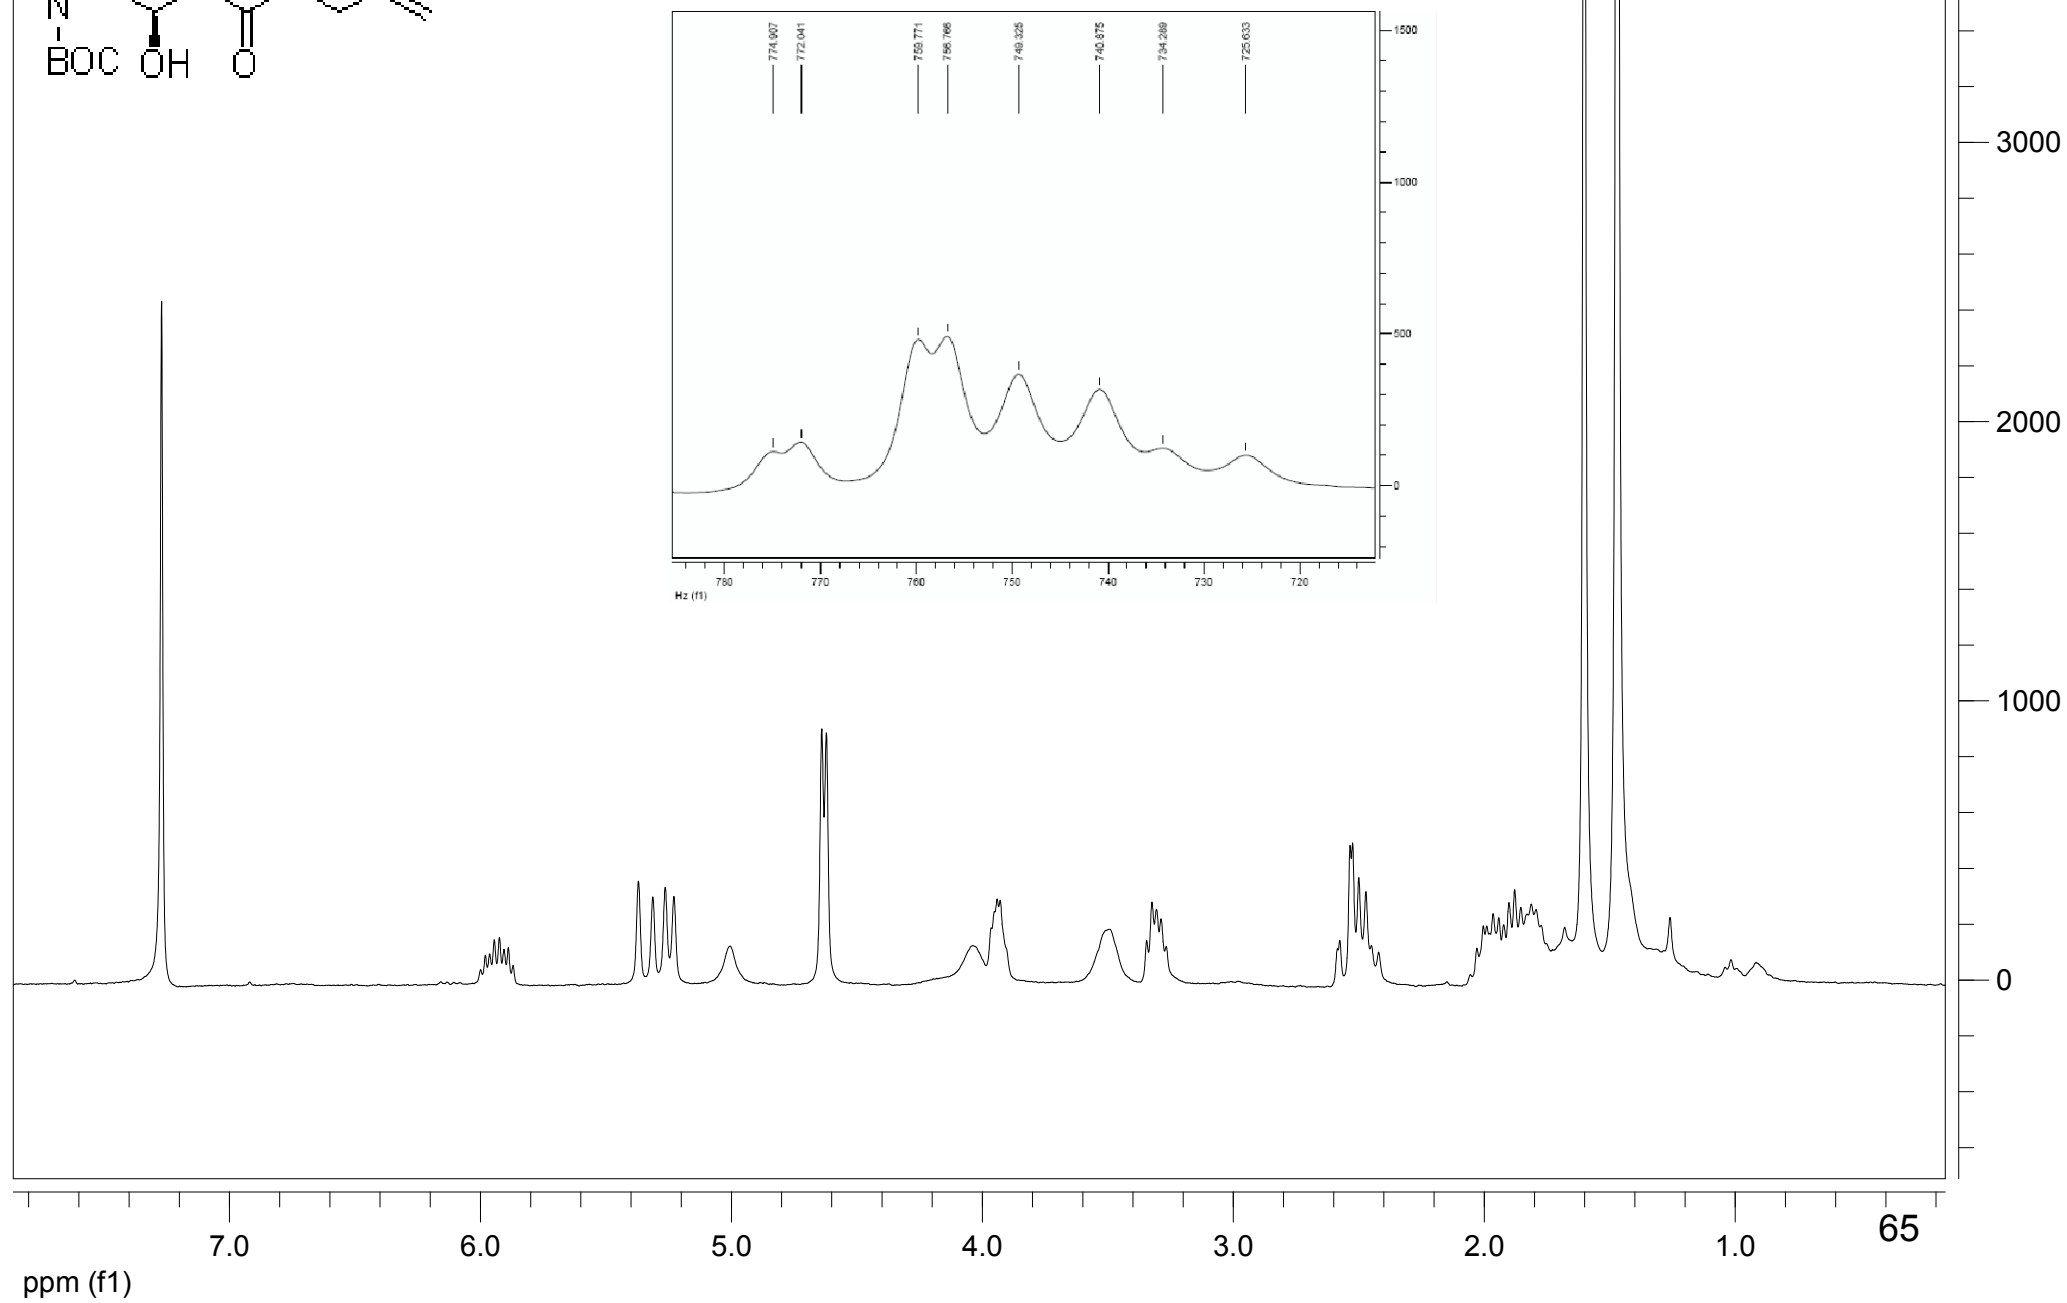

Figure 63. <sup>1</sup>H NMR Spectrum of **18a** in CDCl<sub>3</sub> at 300 MHz

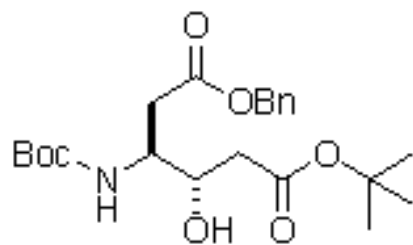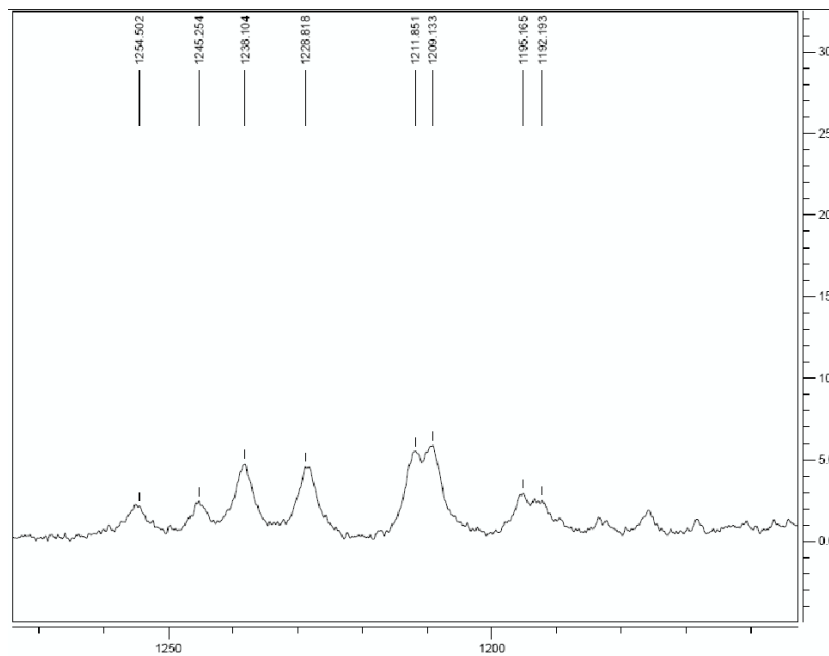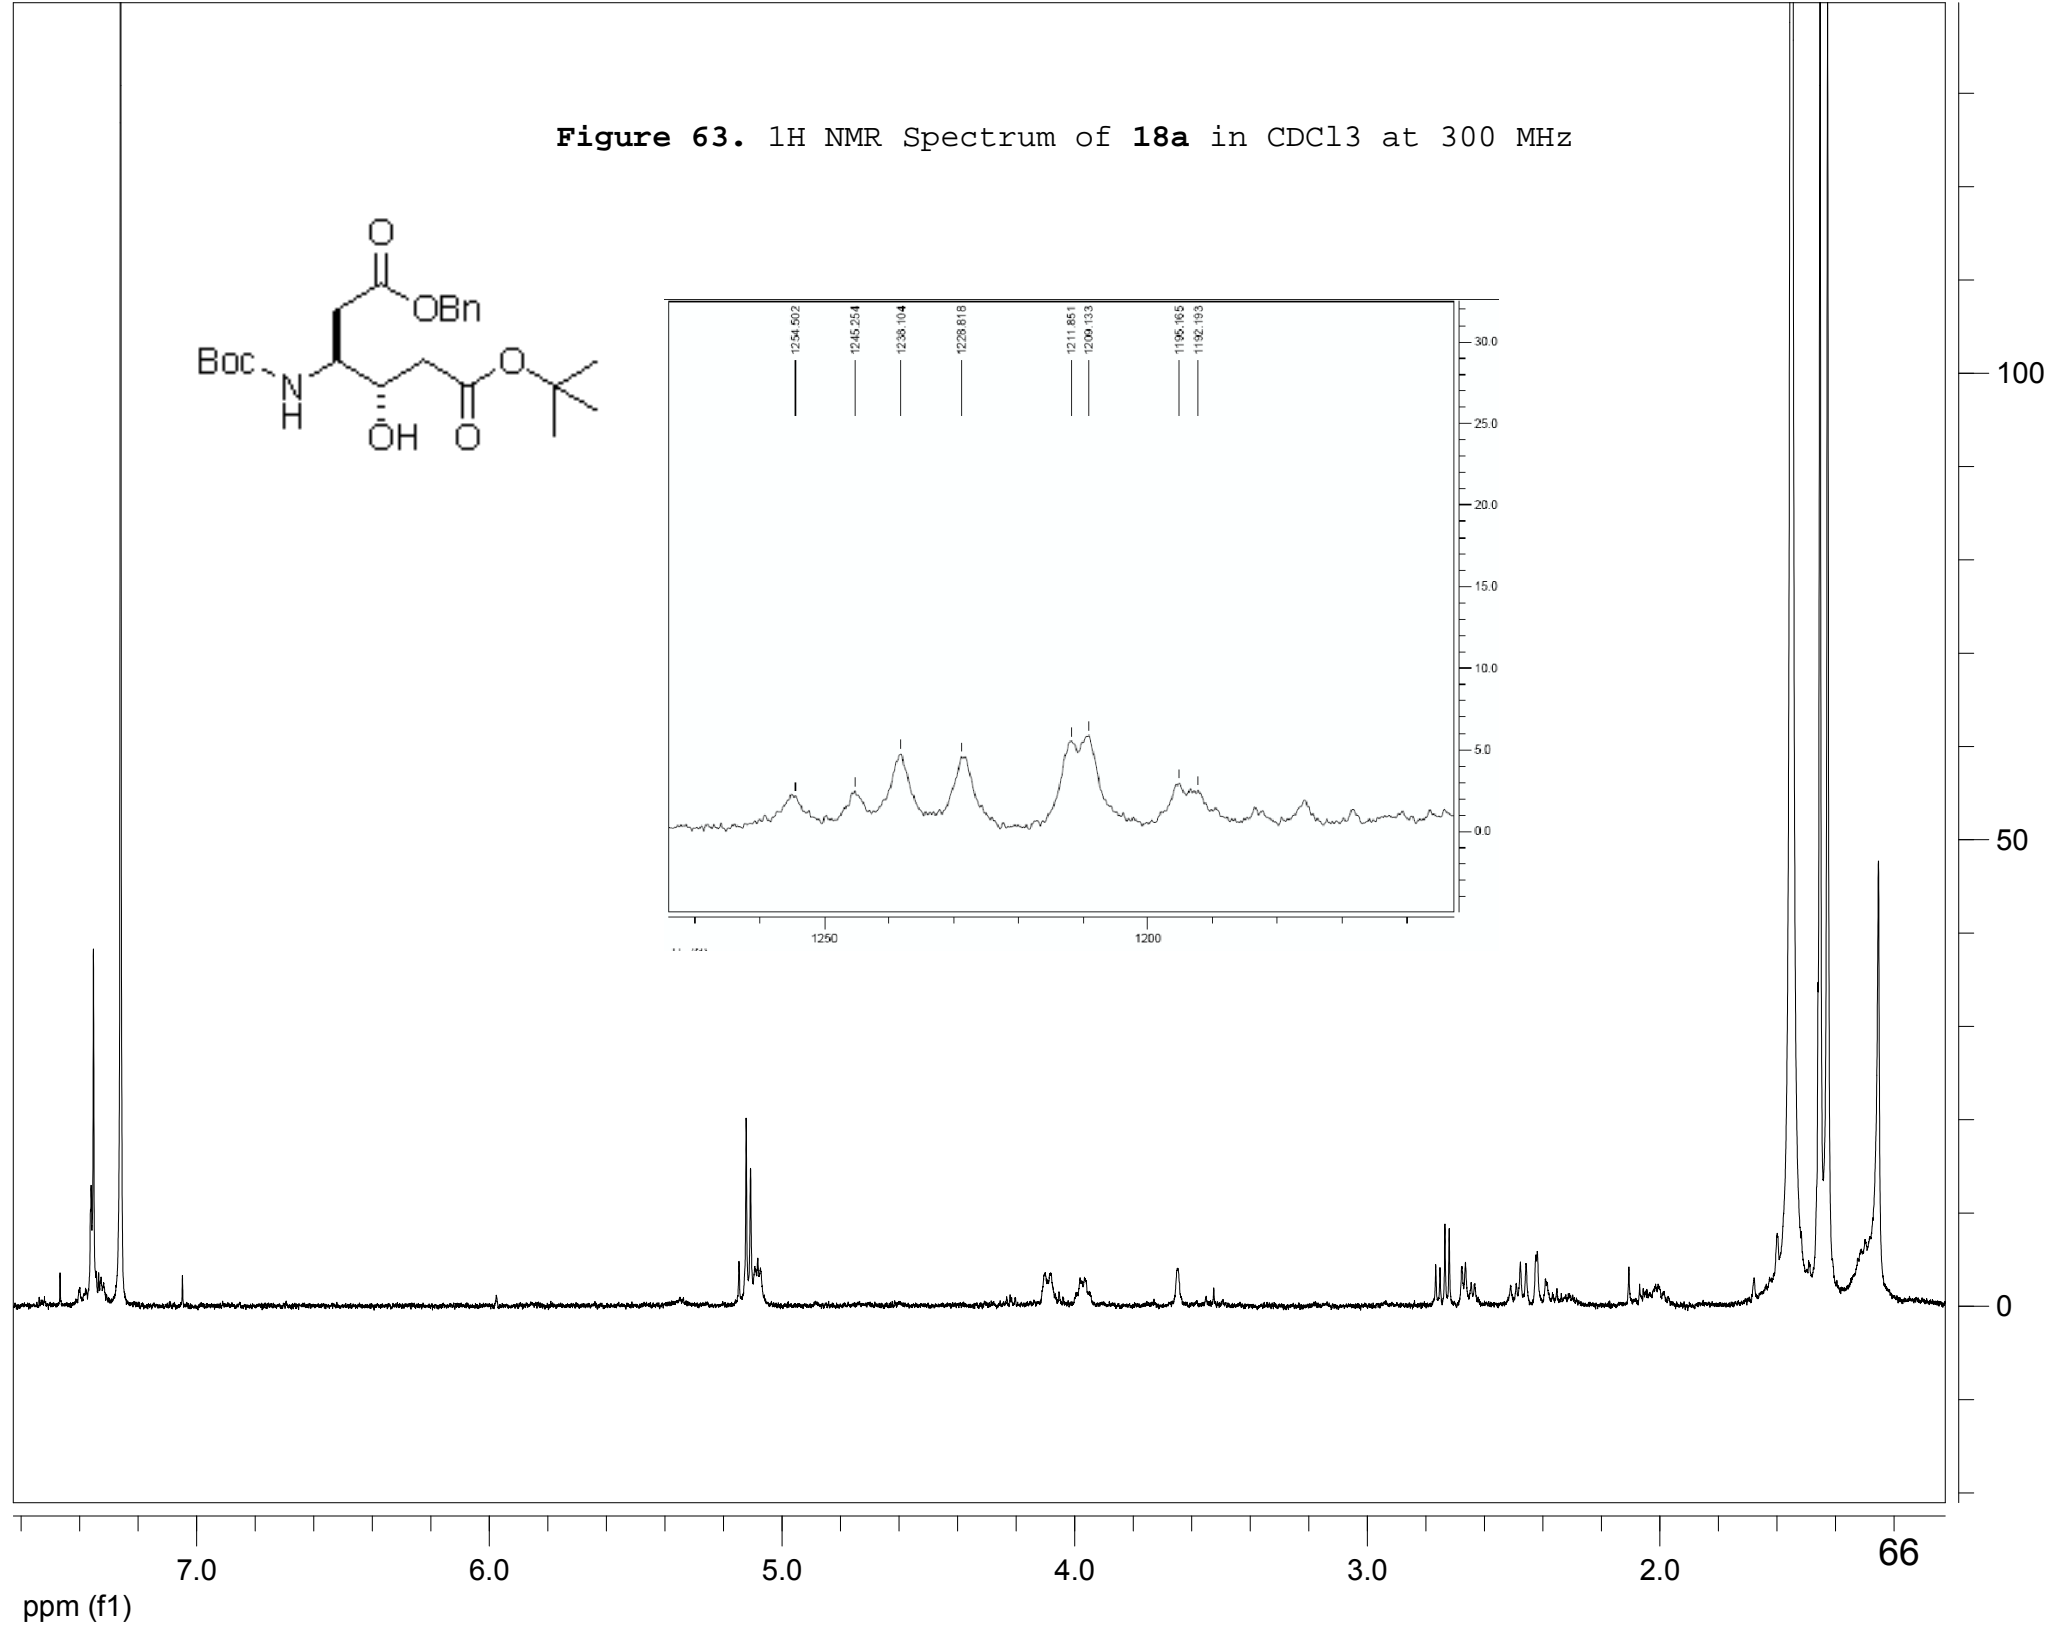

Figure 64. <sup>1</sup>H NMR Spectrum of **18b** in CDCl<sub>3</sub> at 300 MHz

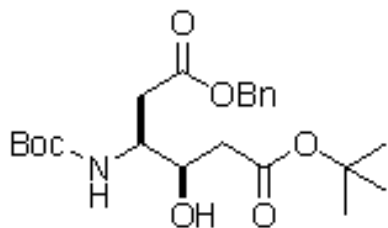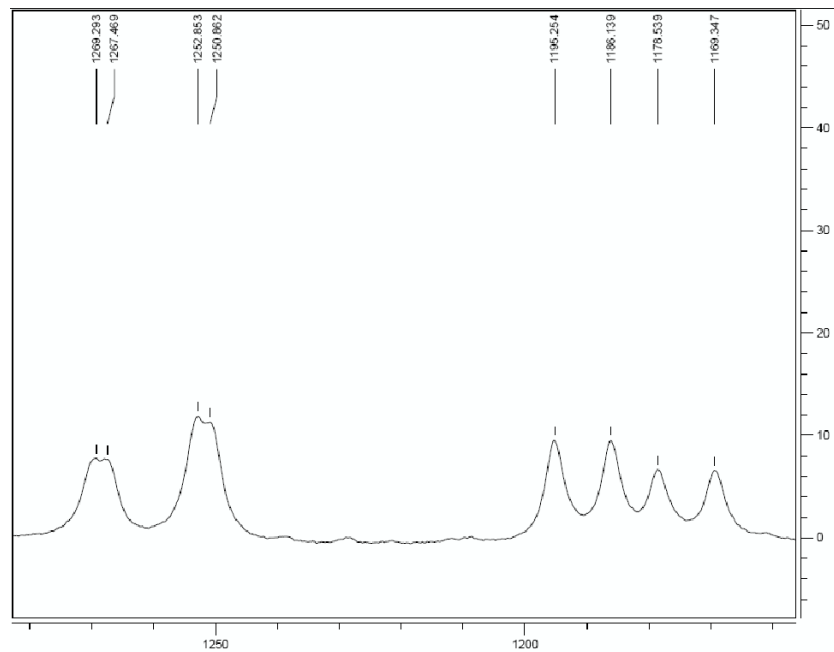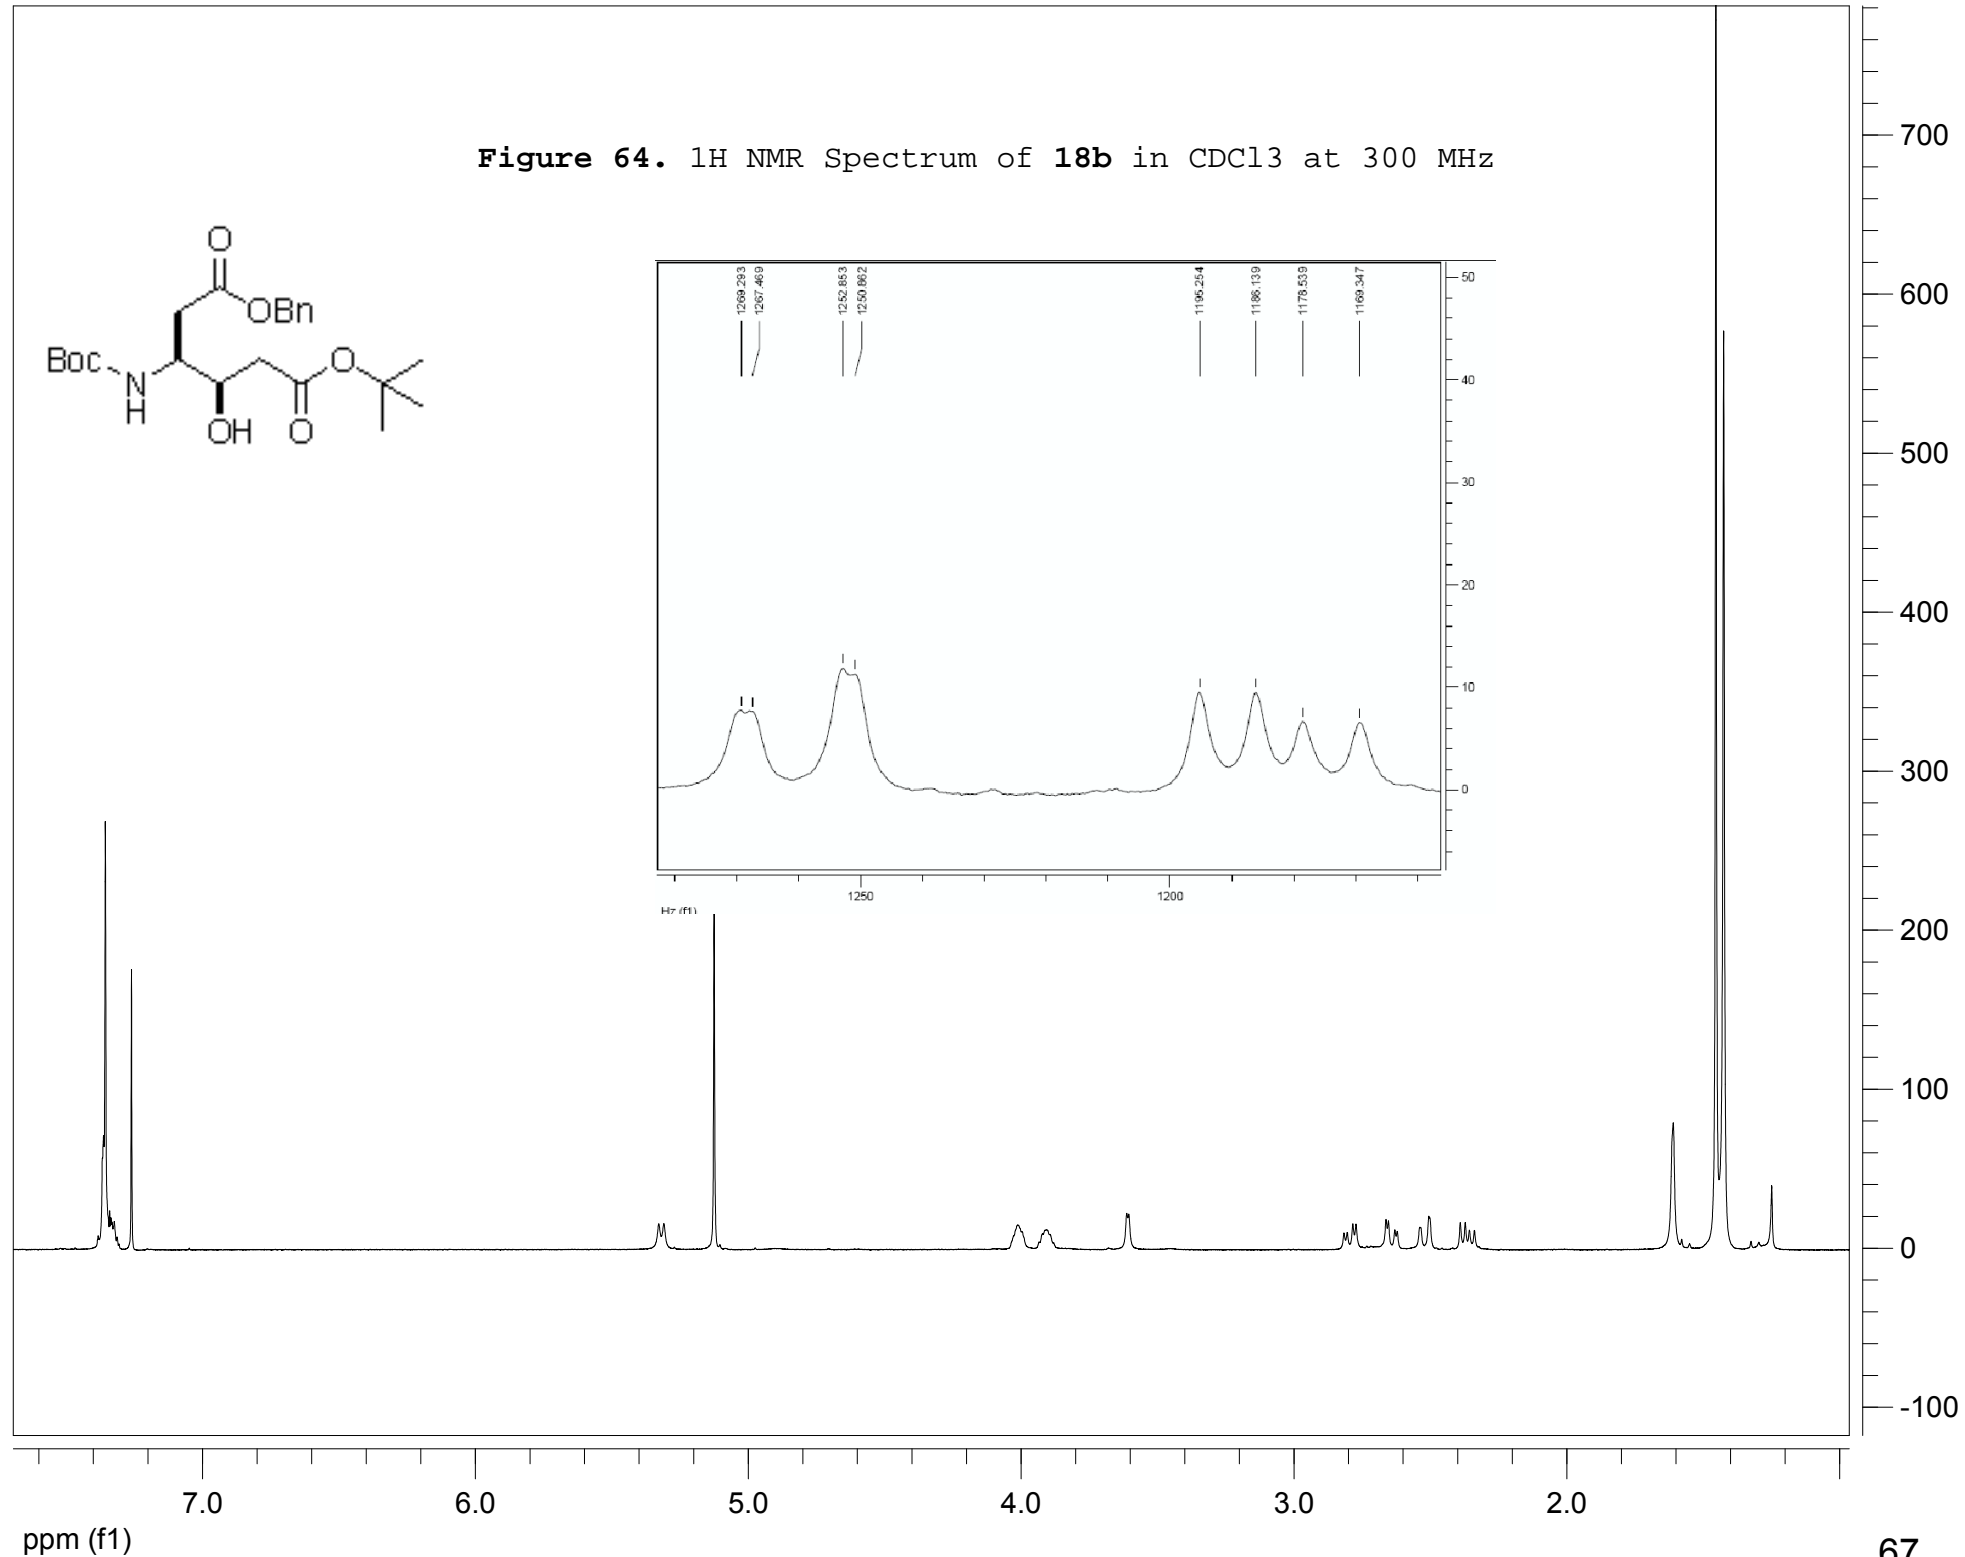

Figure 65. <sup>1</sup>H NMR spectrum of Compound **16c** at 300 MHz in CDCl<sub>3</sub>

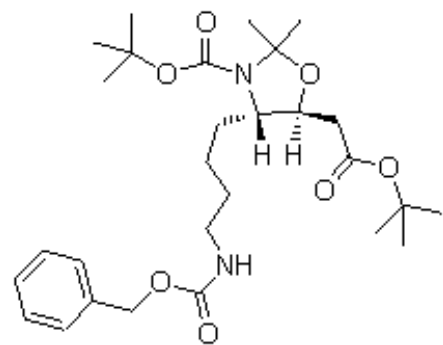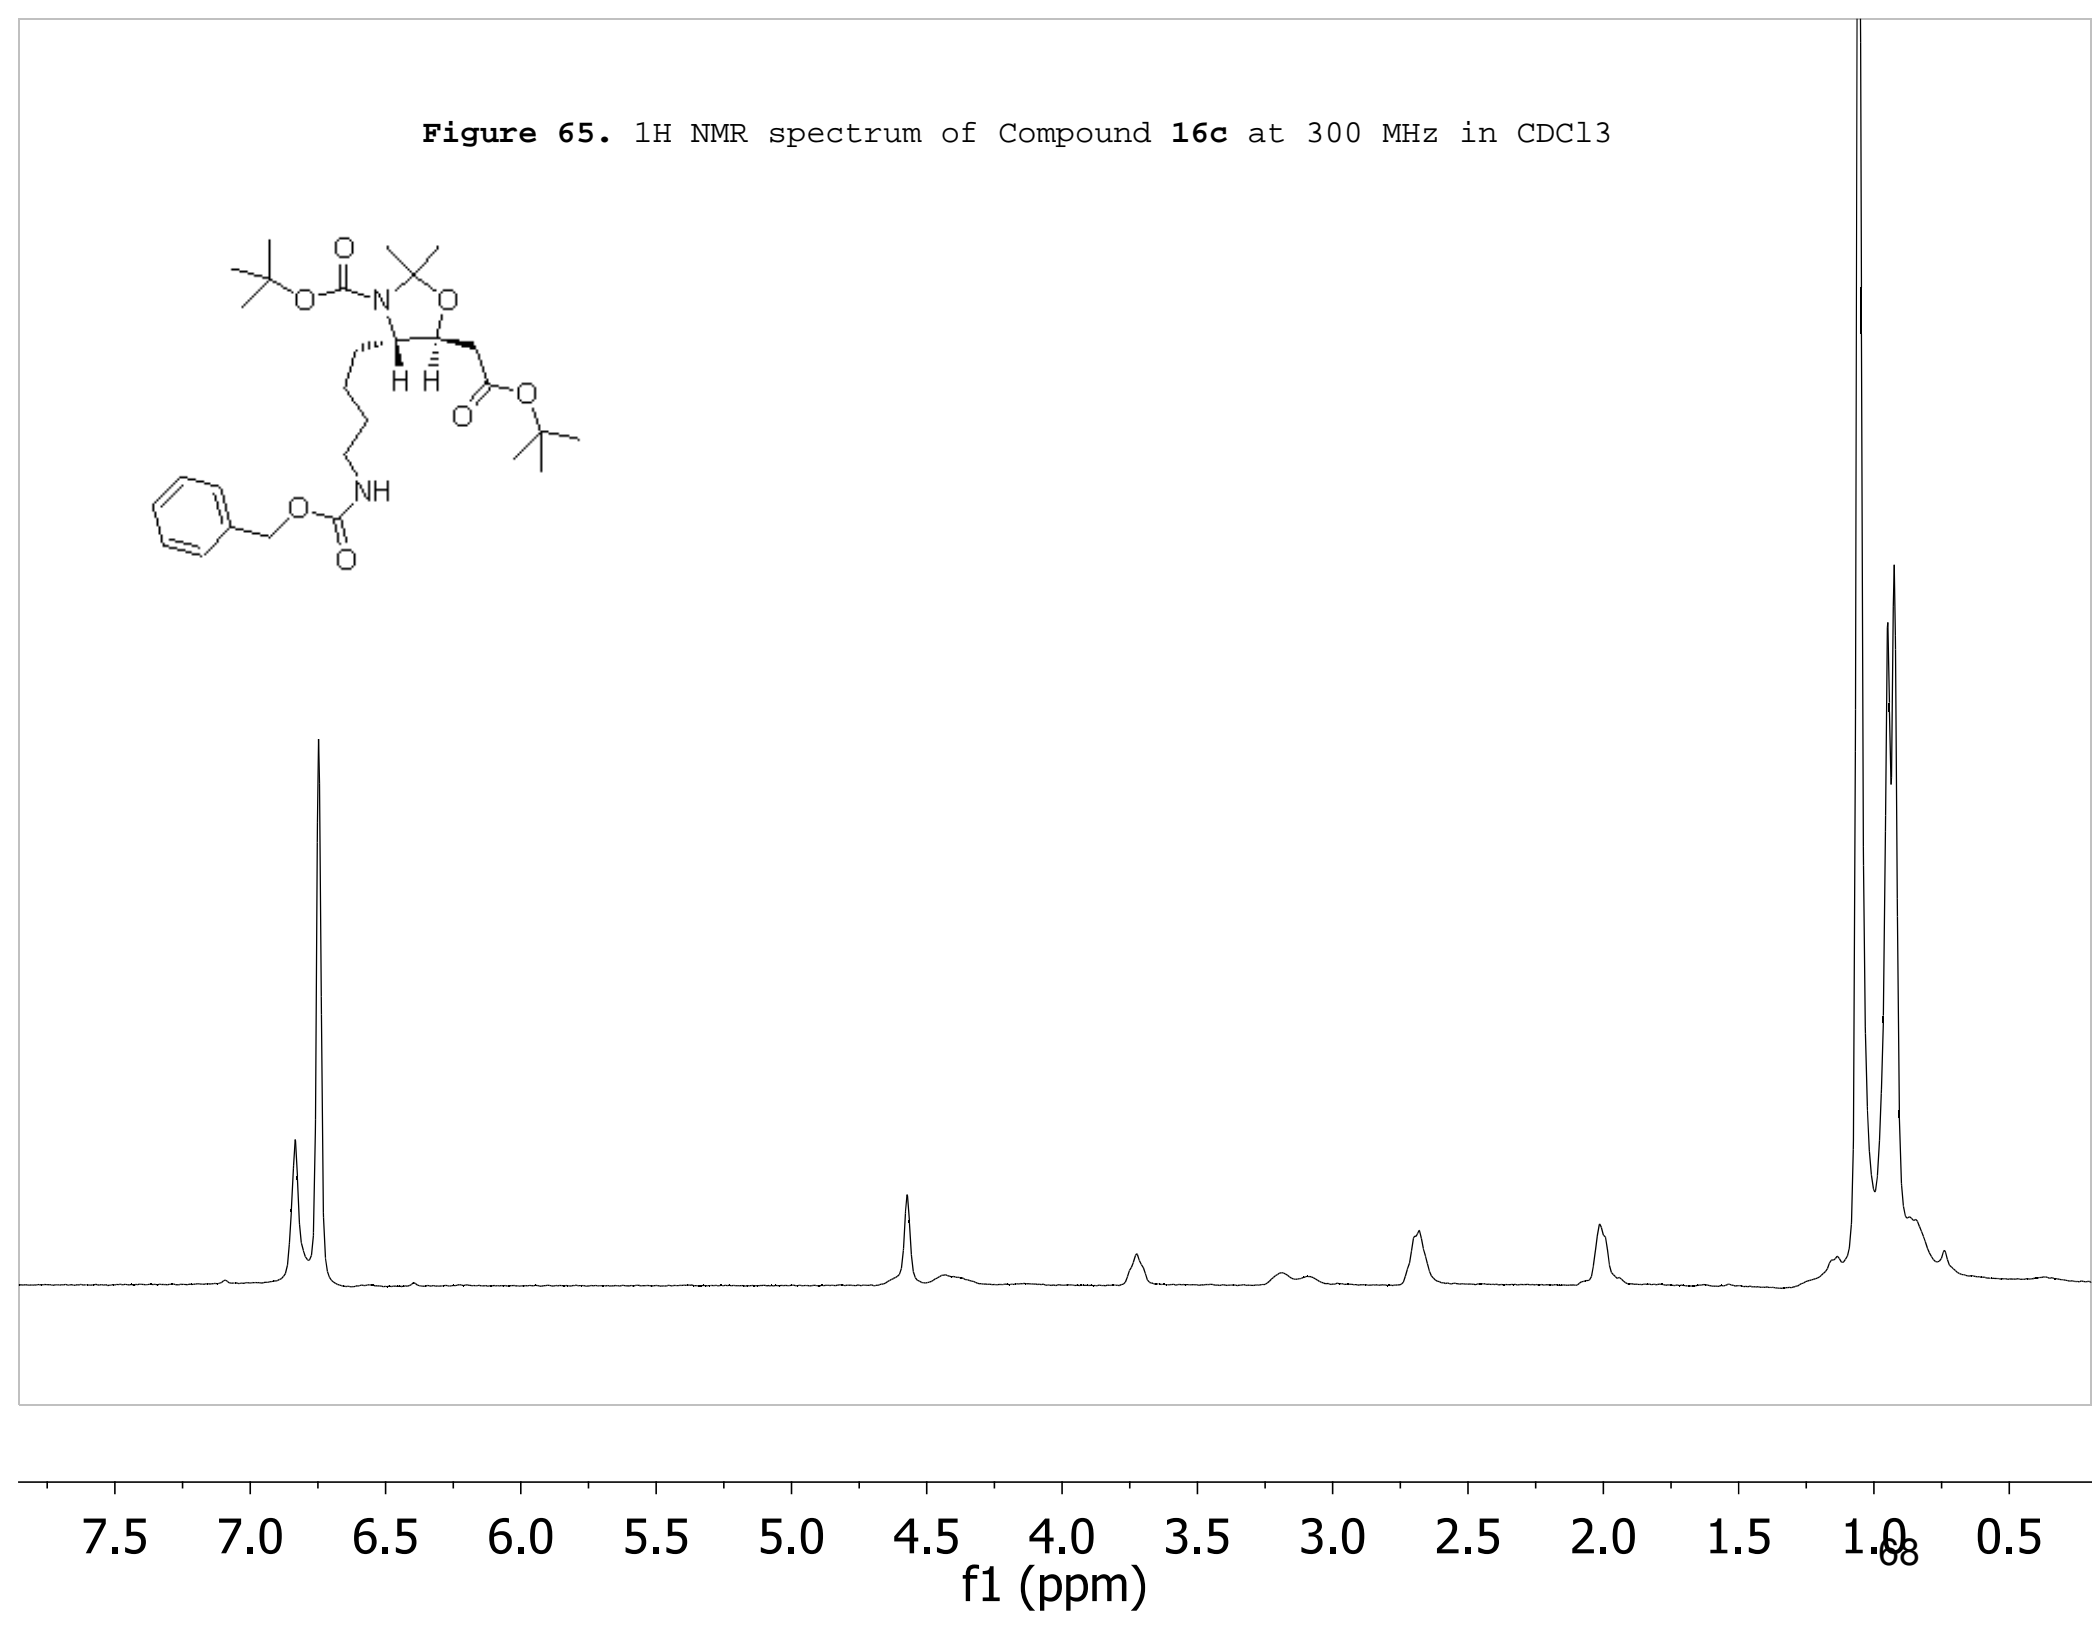

Figure 66. <sup>1</sup>H NMR spectrum of Compound **24c** at 500 MHz in CDCl<sub>3</sub>

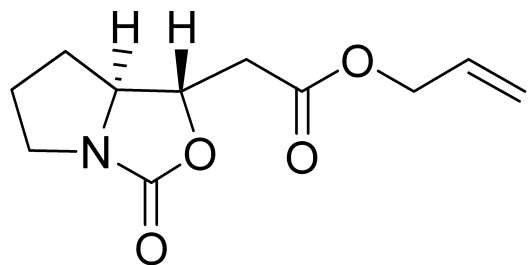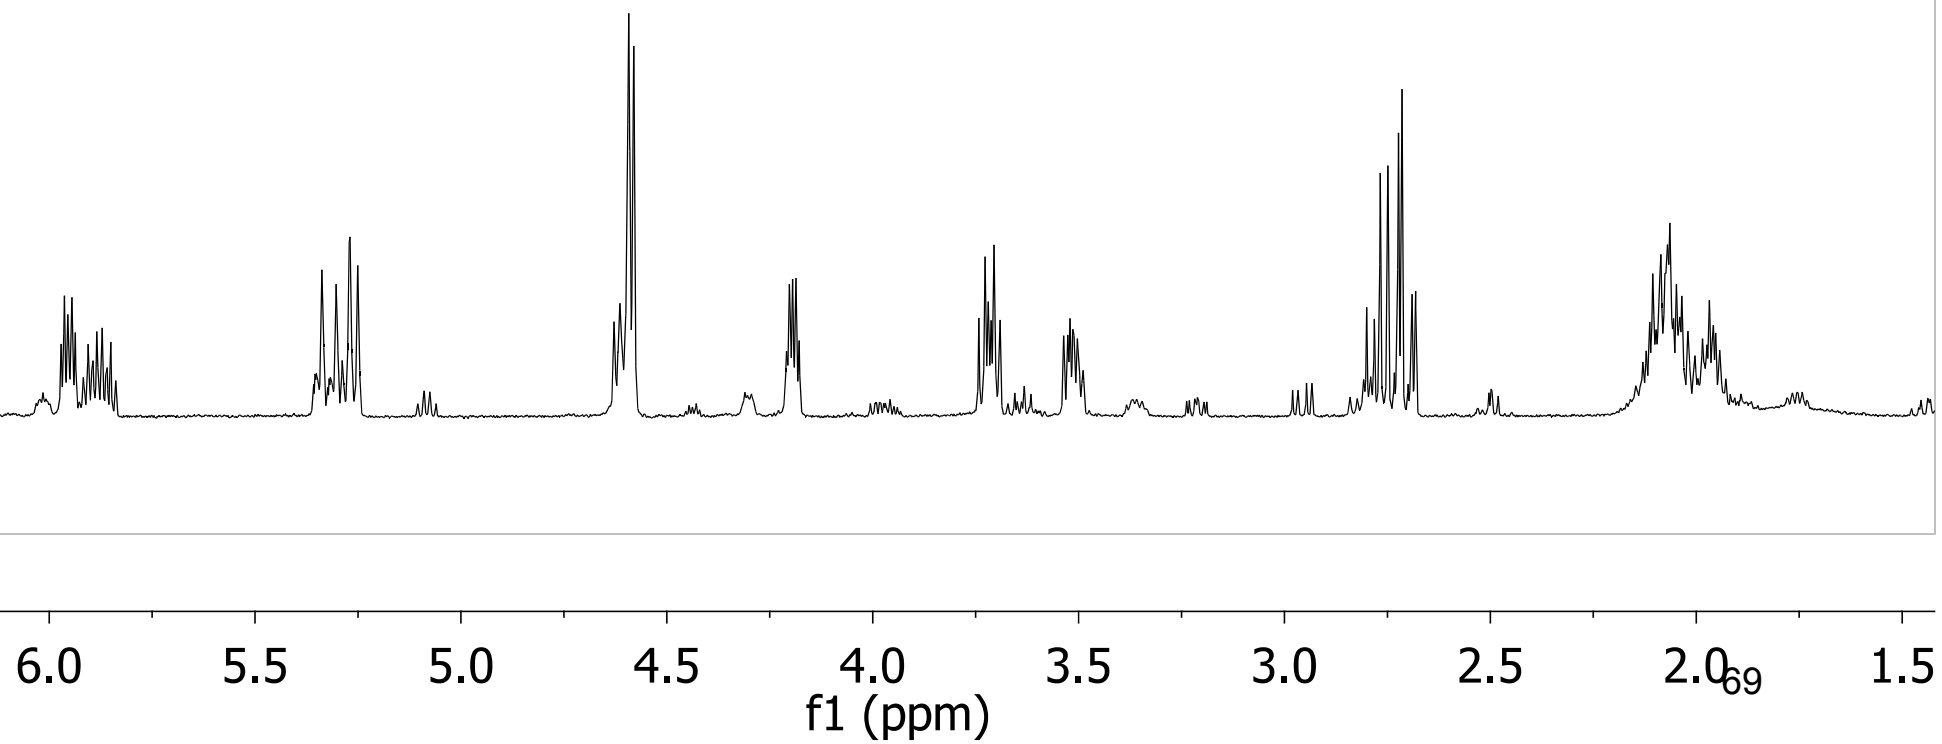

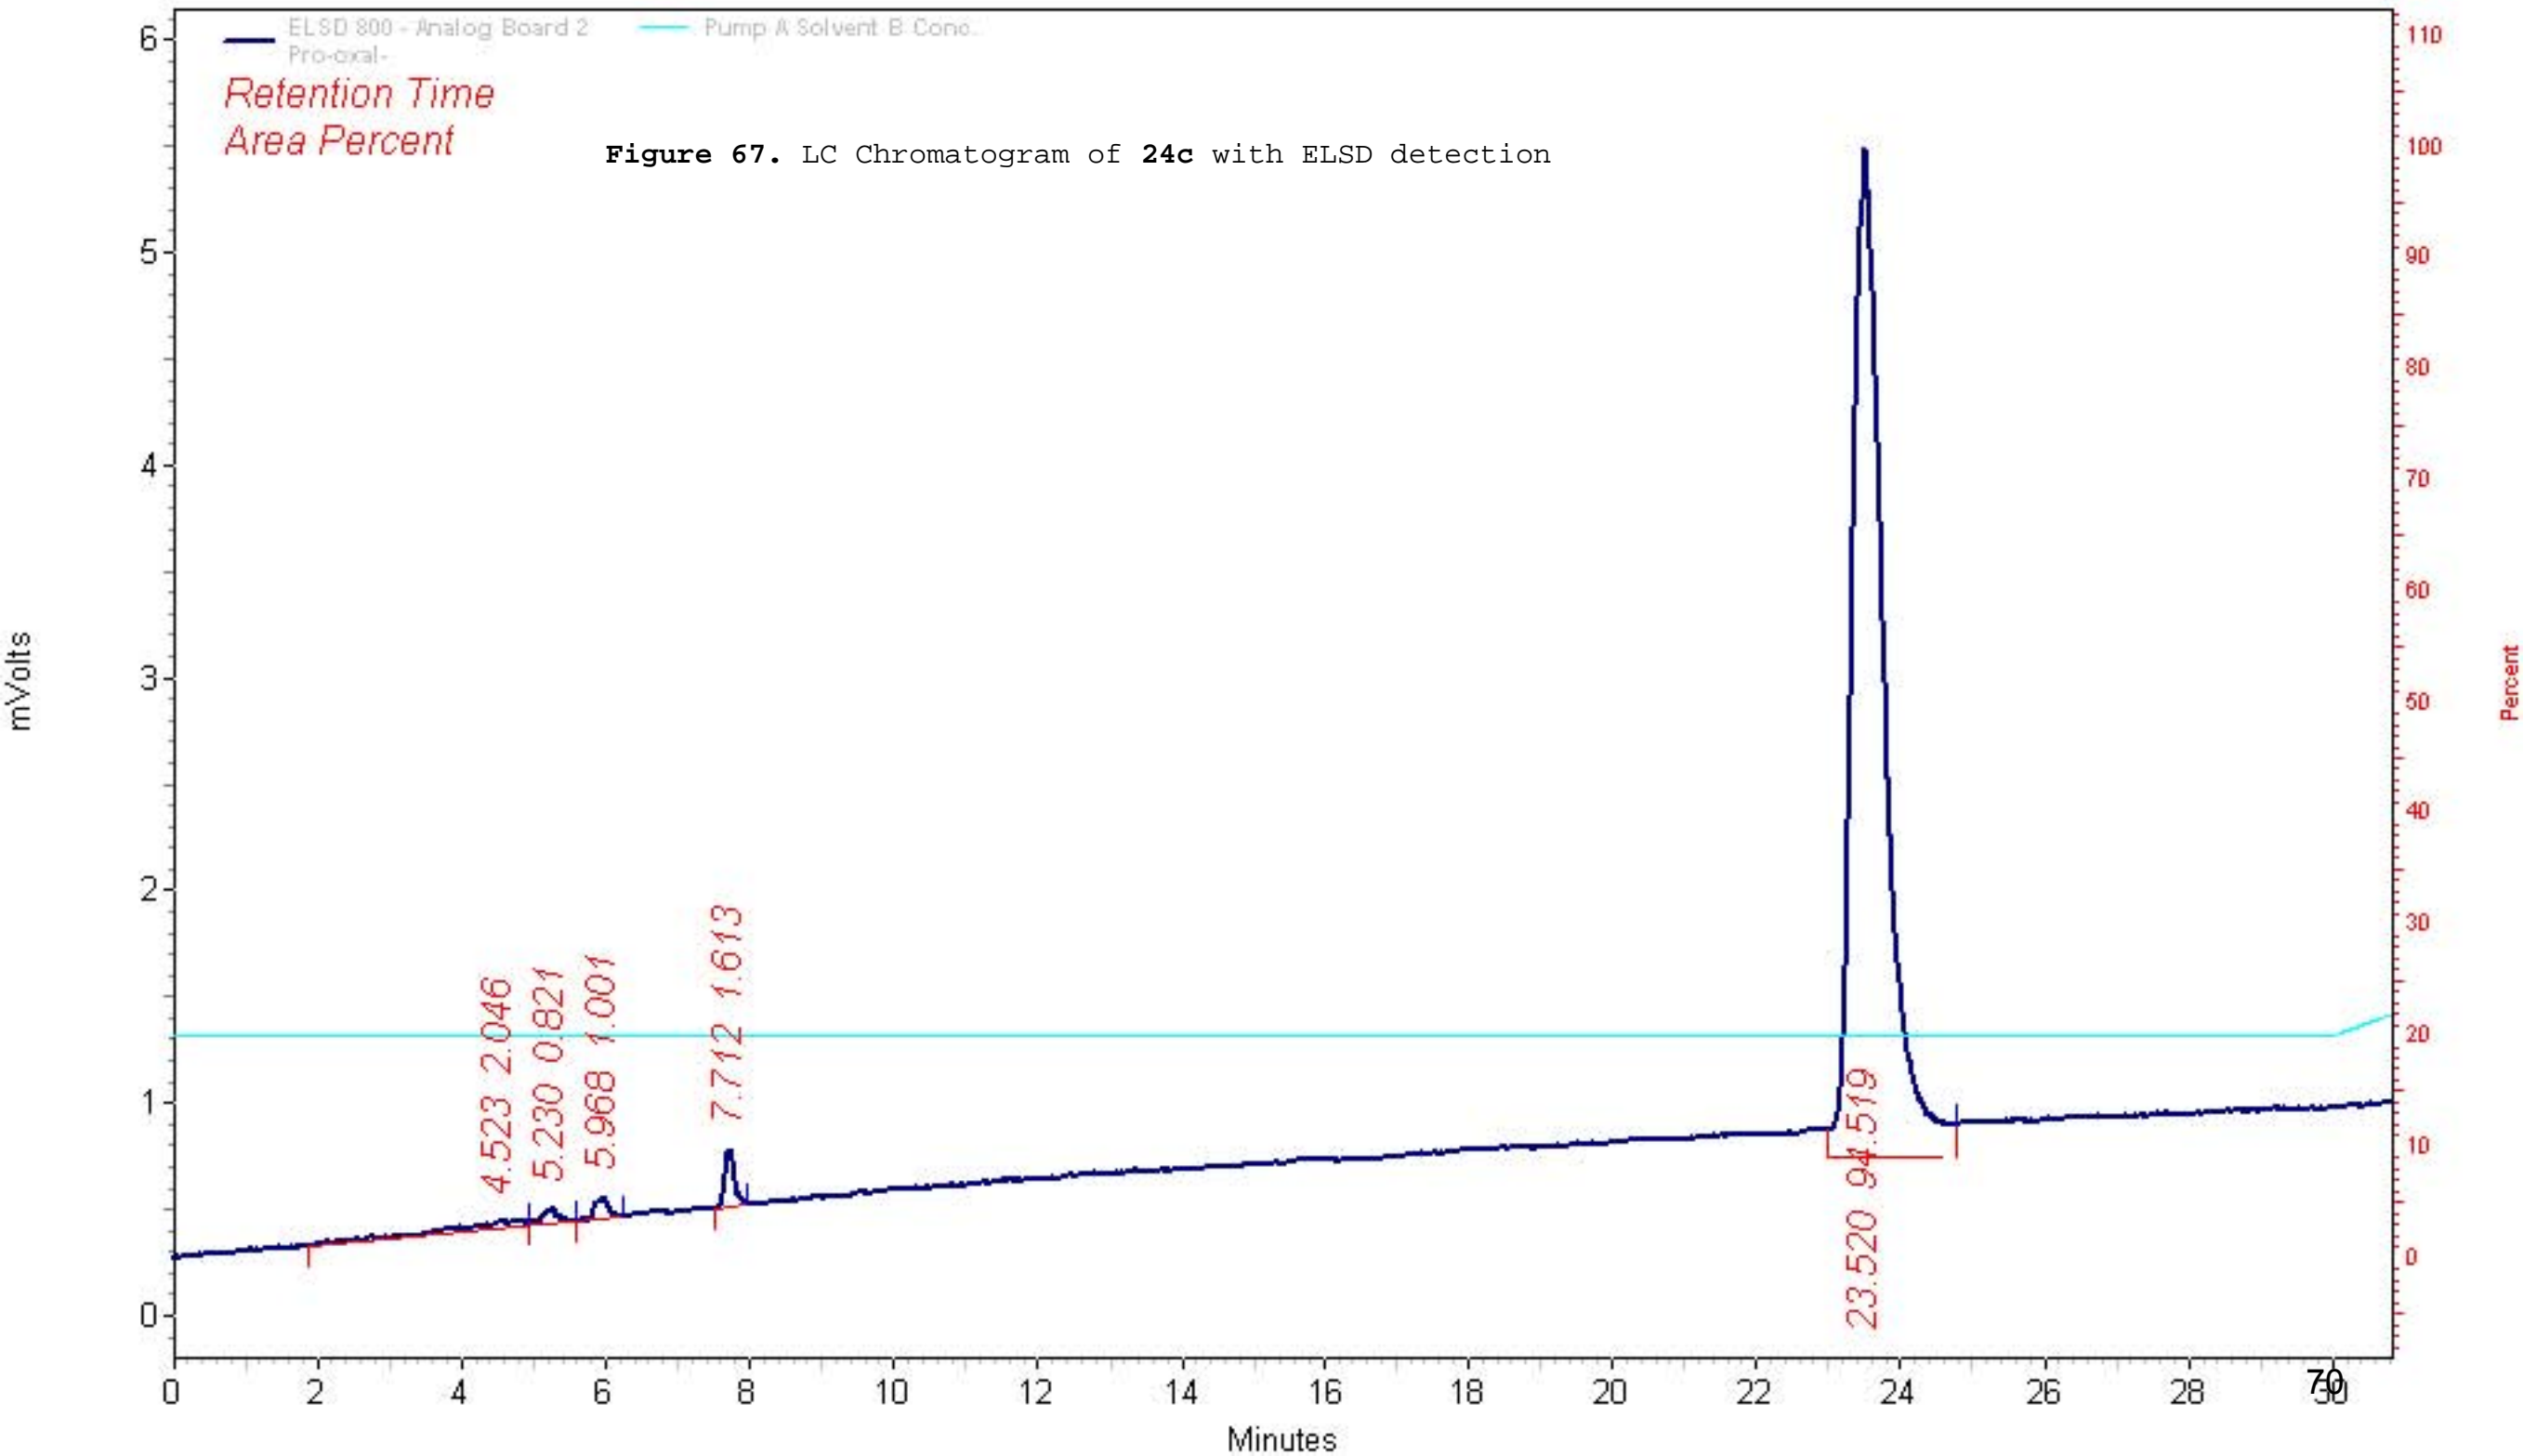

Figure 68. <sup>1</sup>H NMR spectrum of Compound **9a** at 300 MHz in CDCl<sub>3</sub>

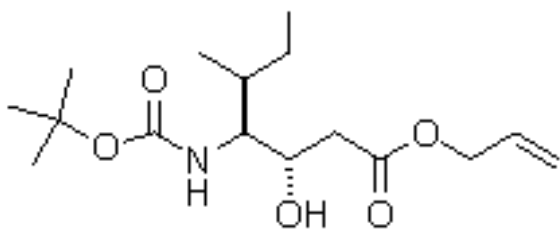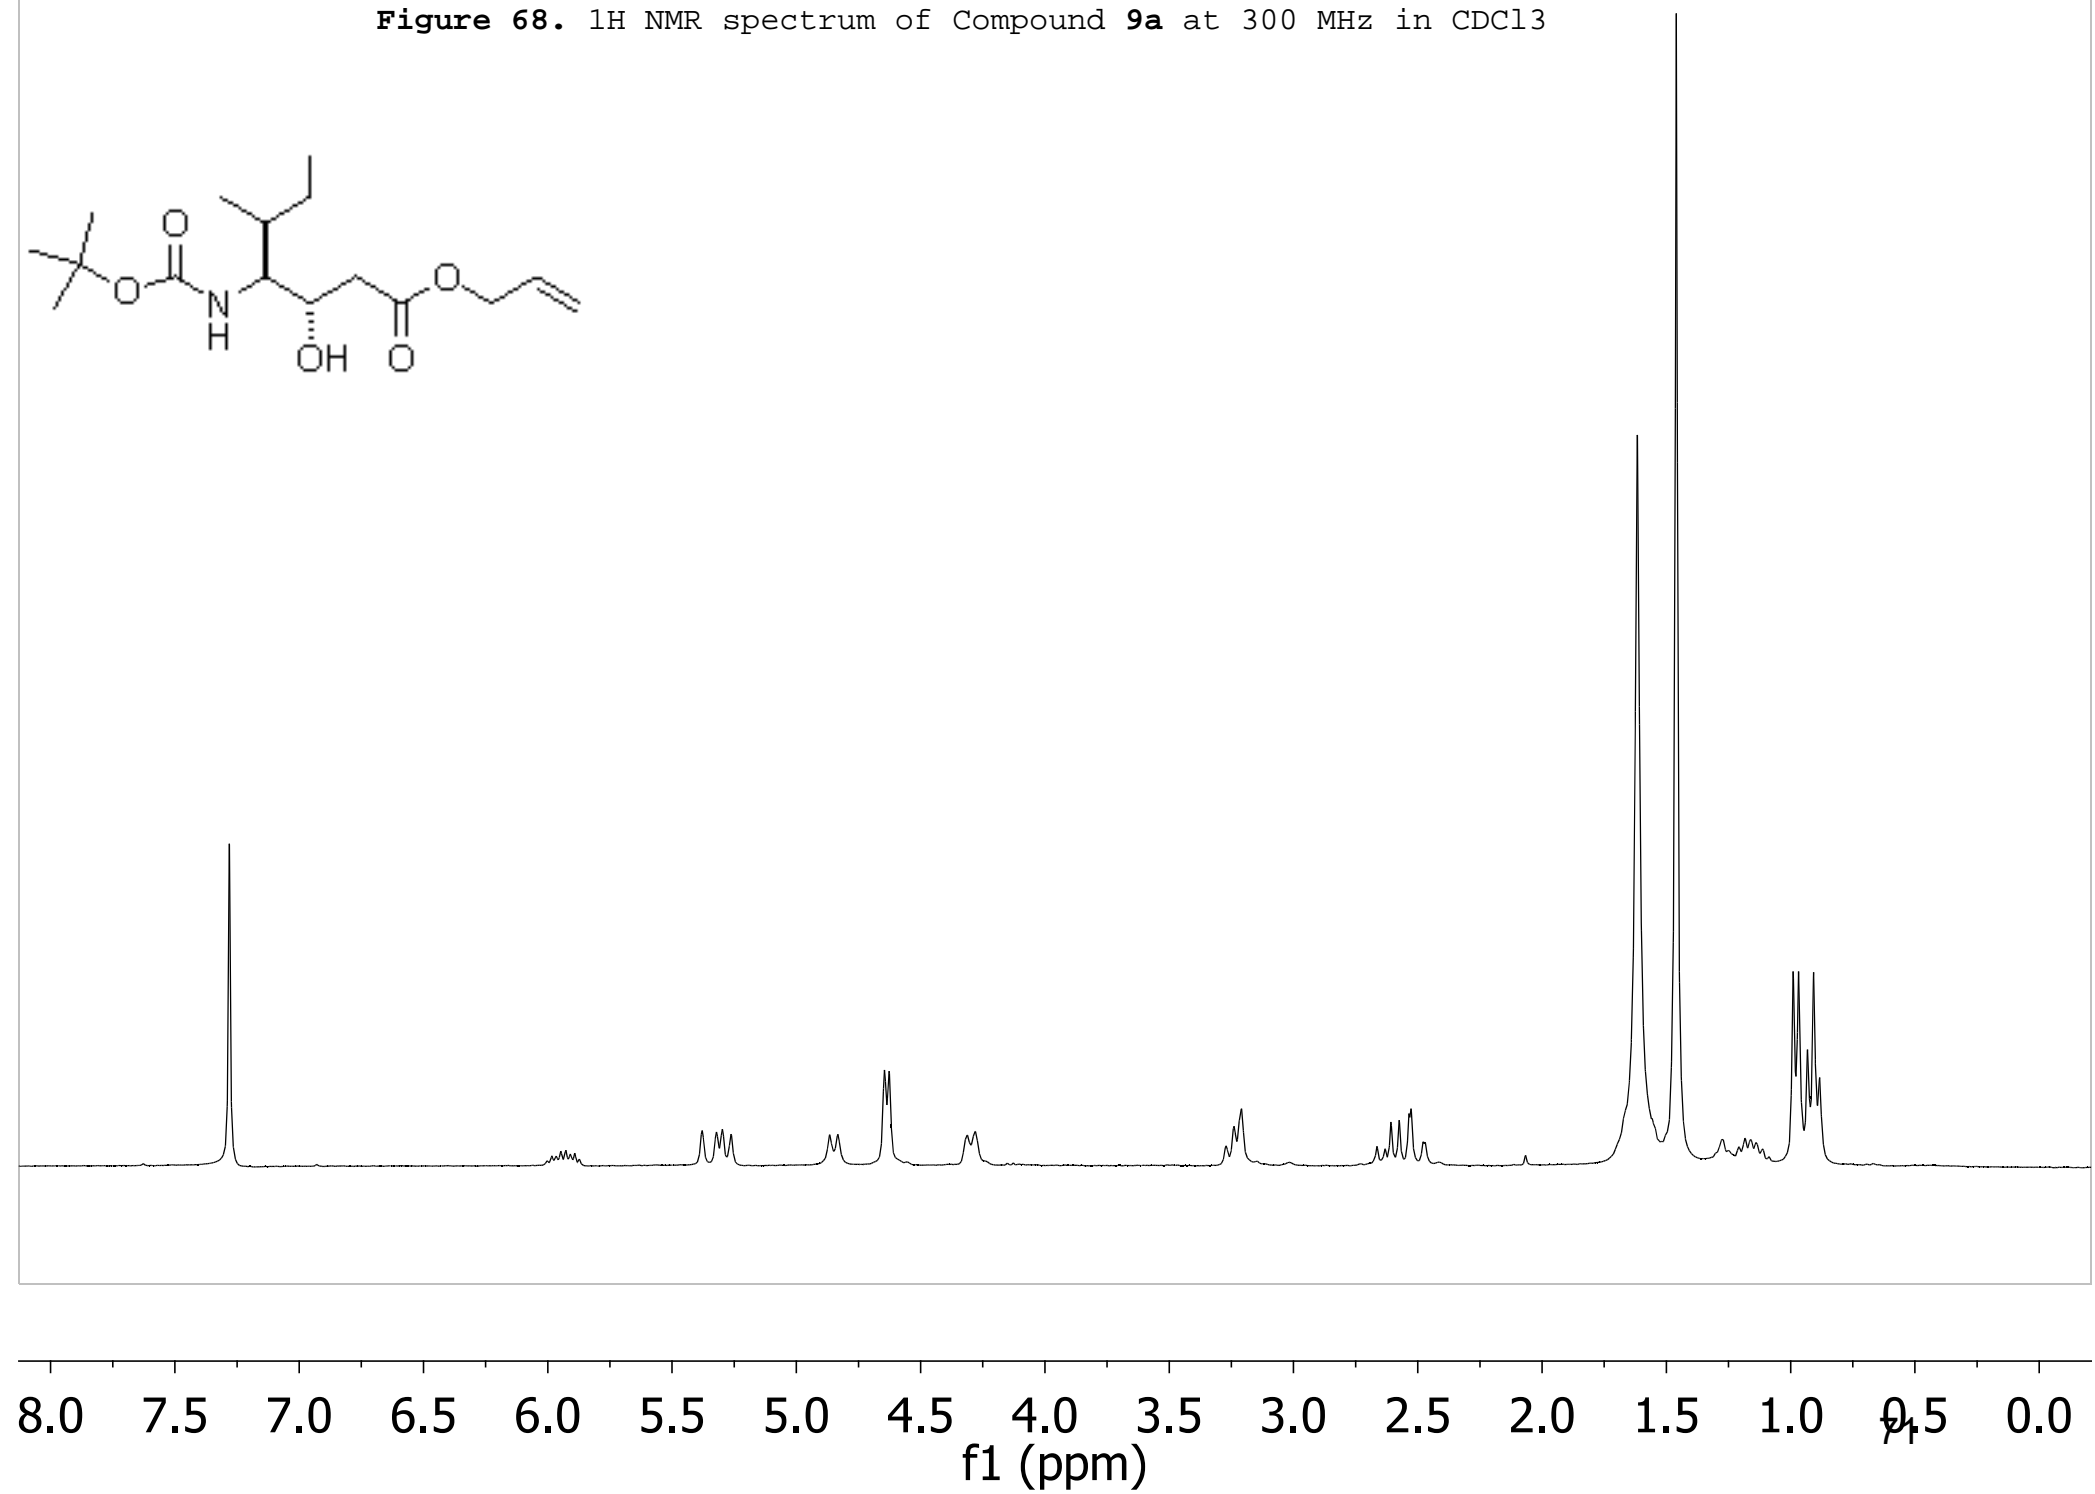

Figure 69. <sup>1</sup>H NMR spectrum of Compound **9b** at 300 MHz in CDCl<sub>3</sub>

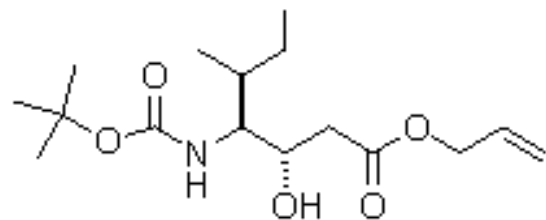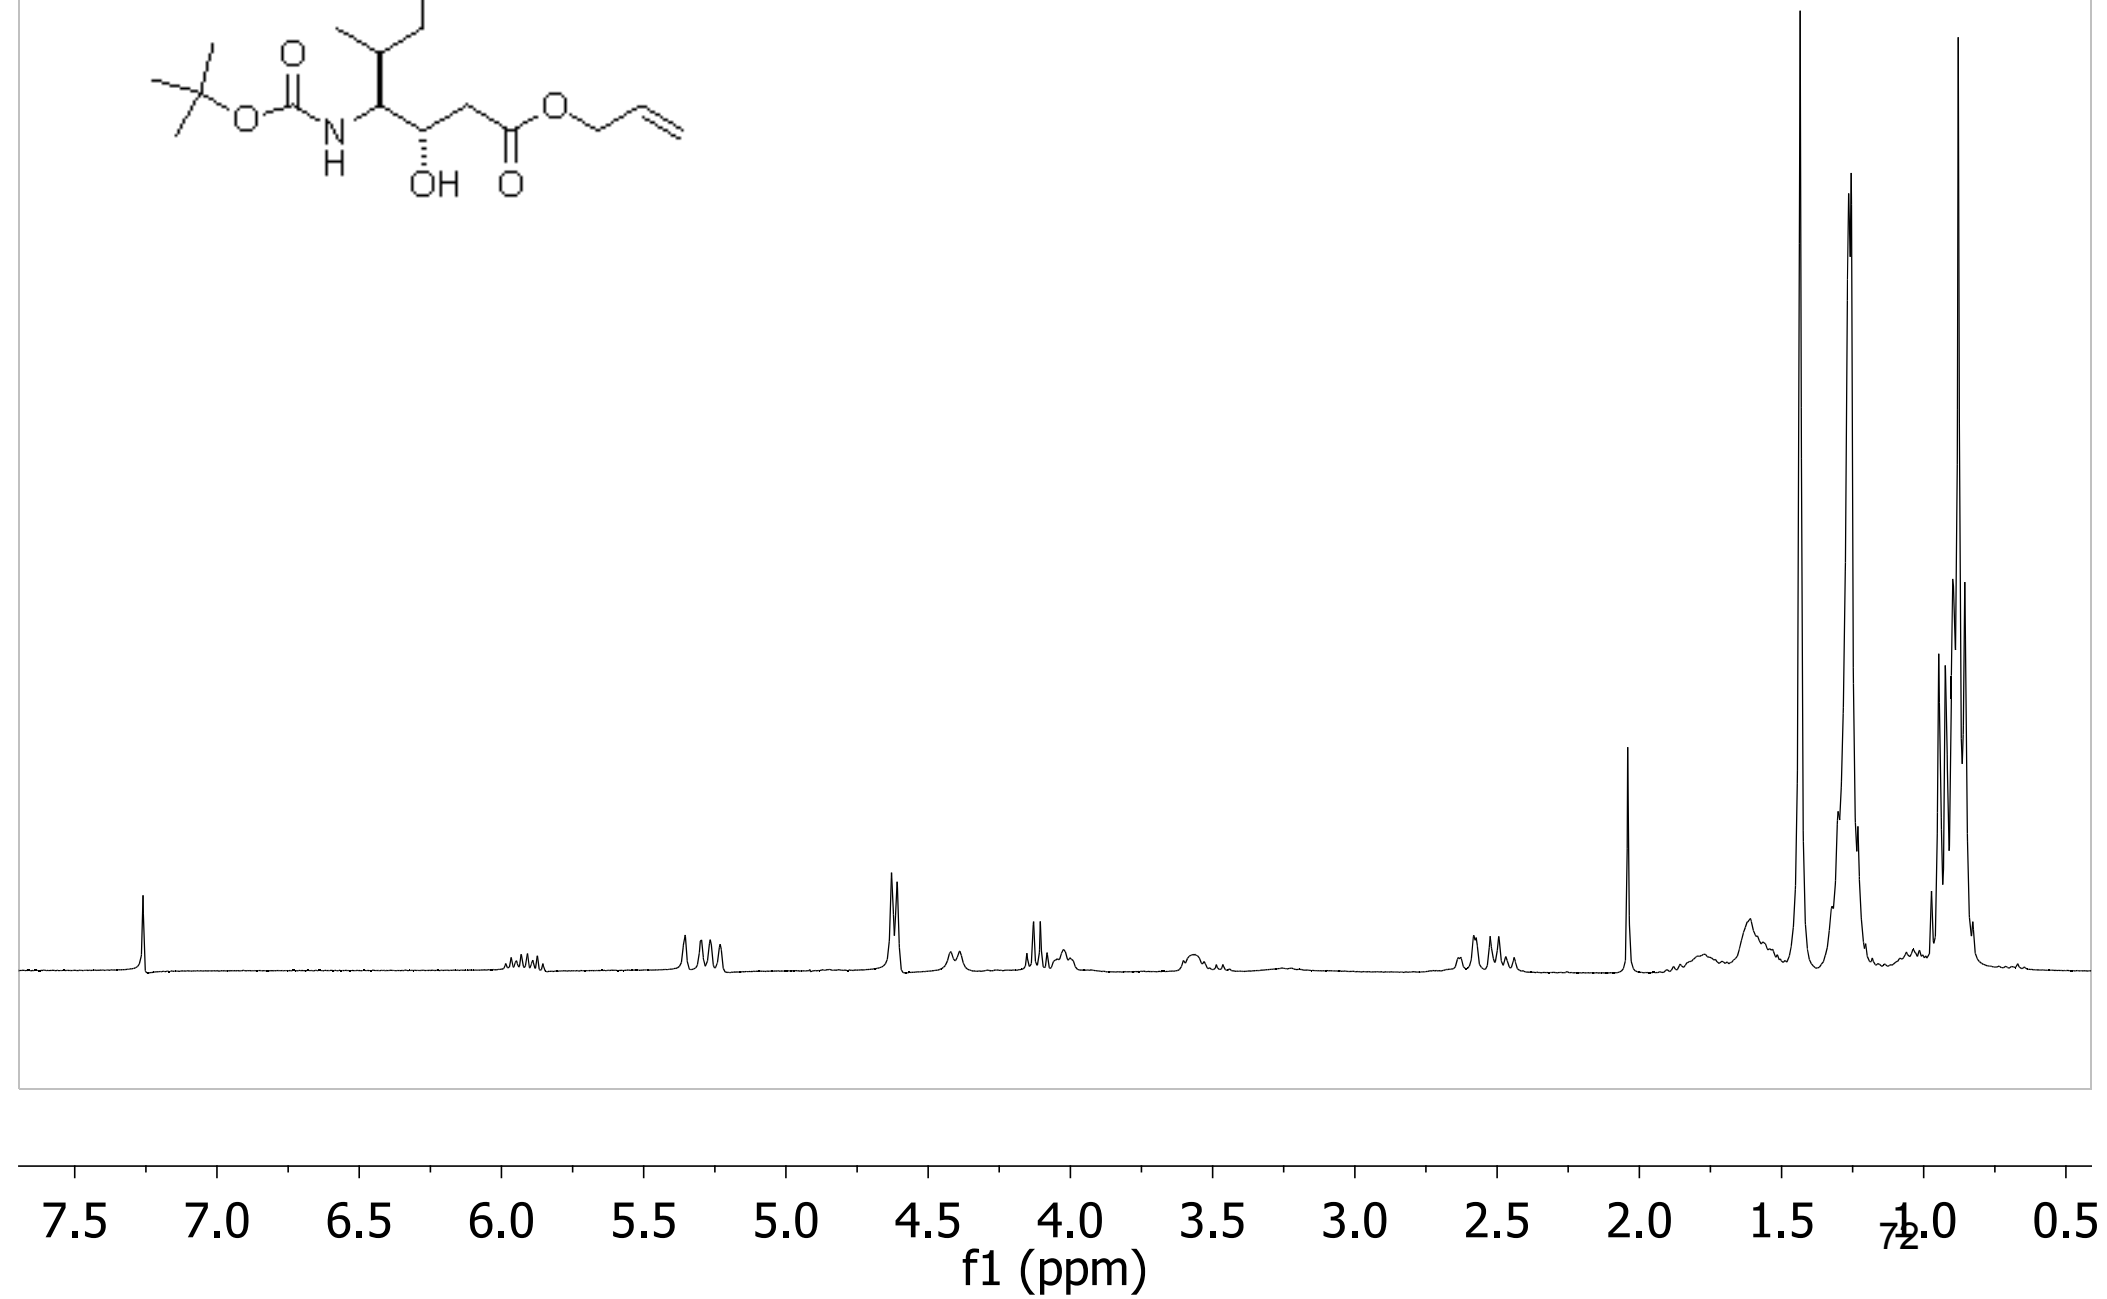



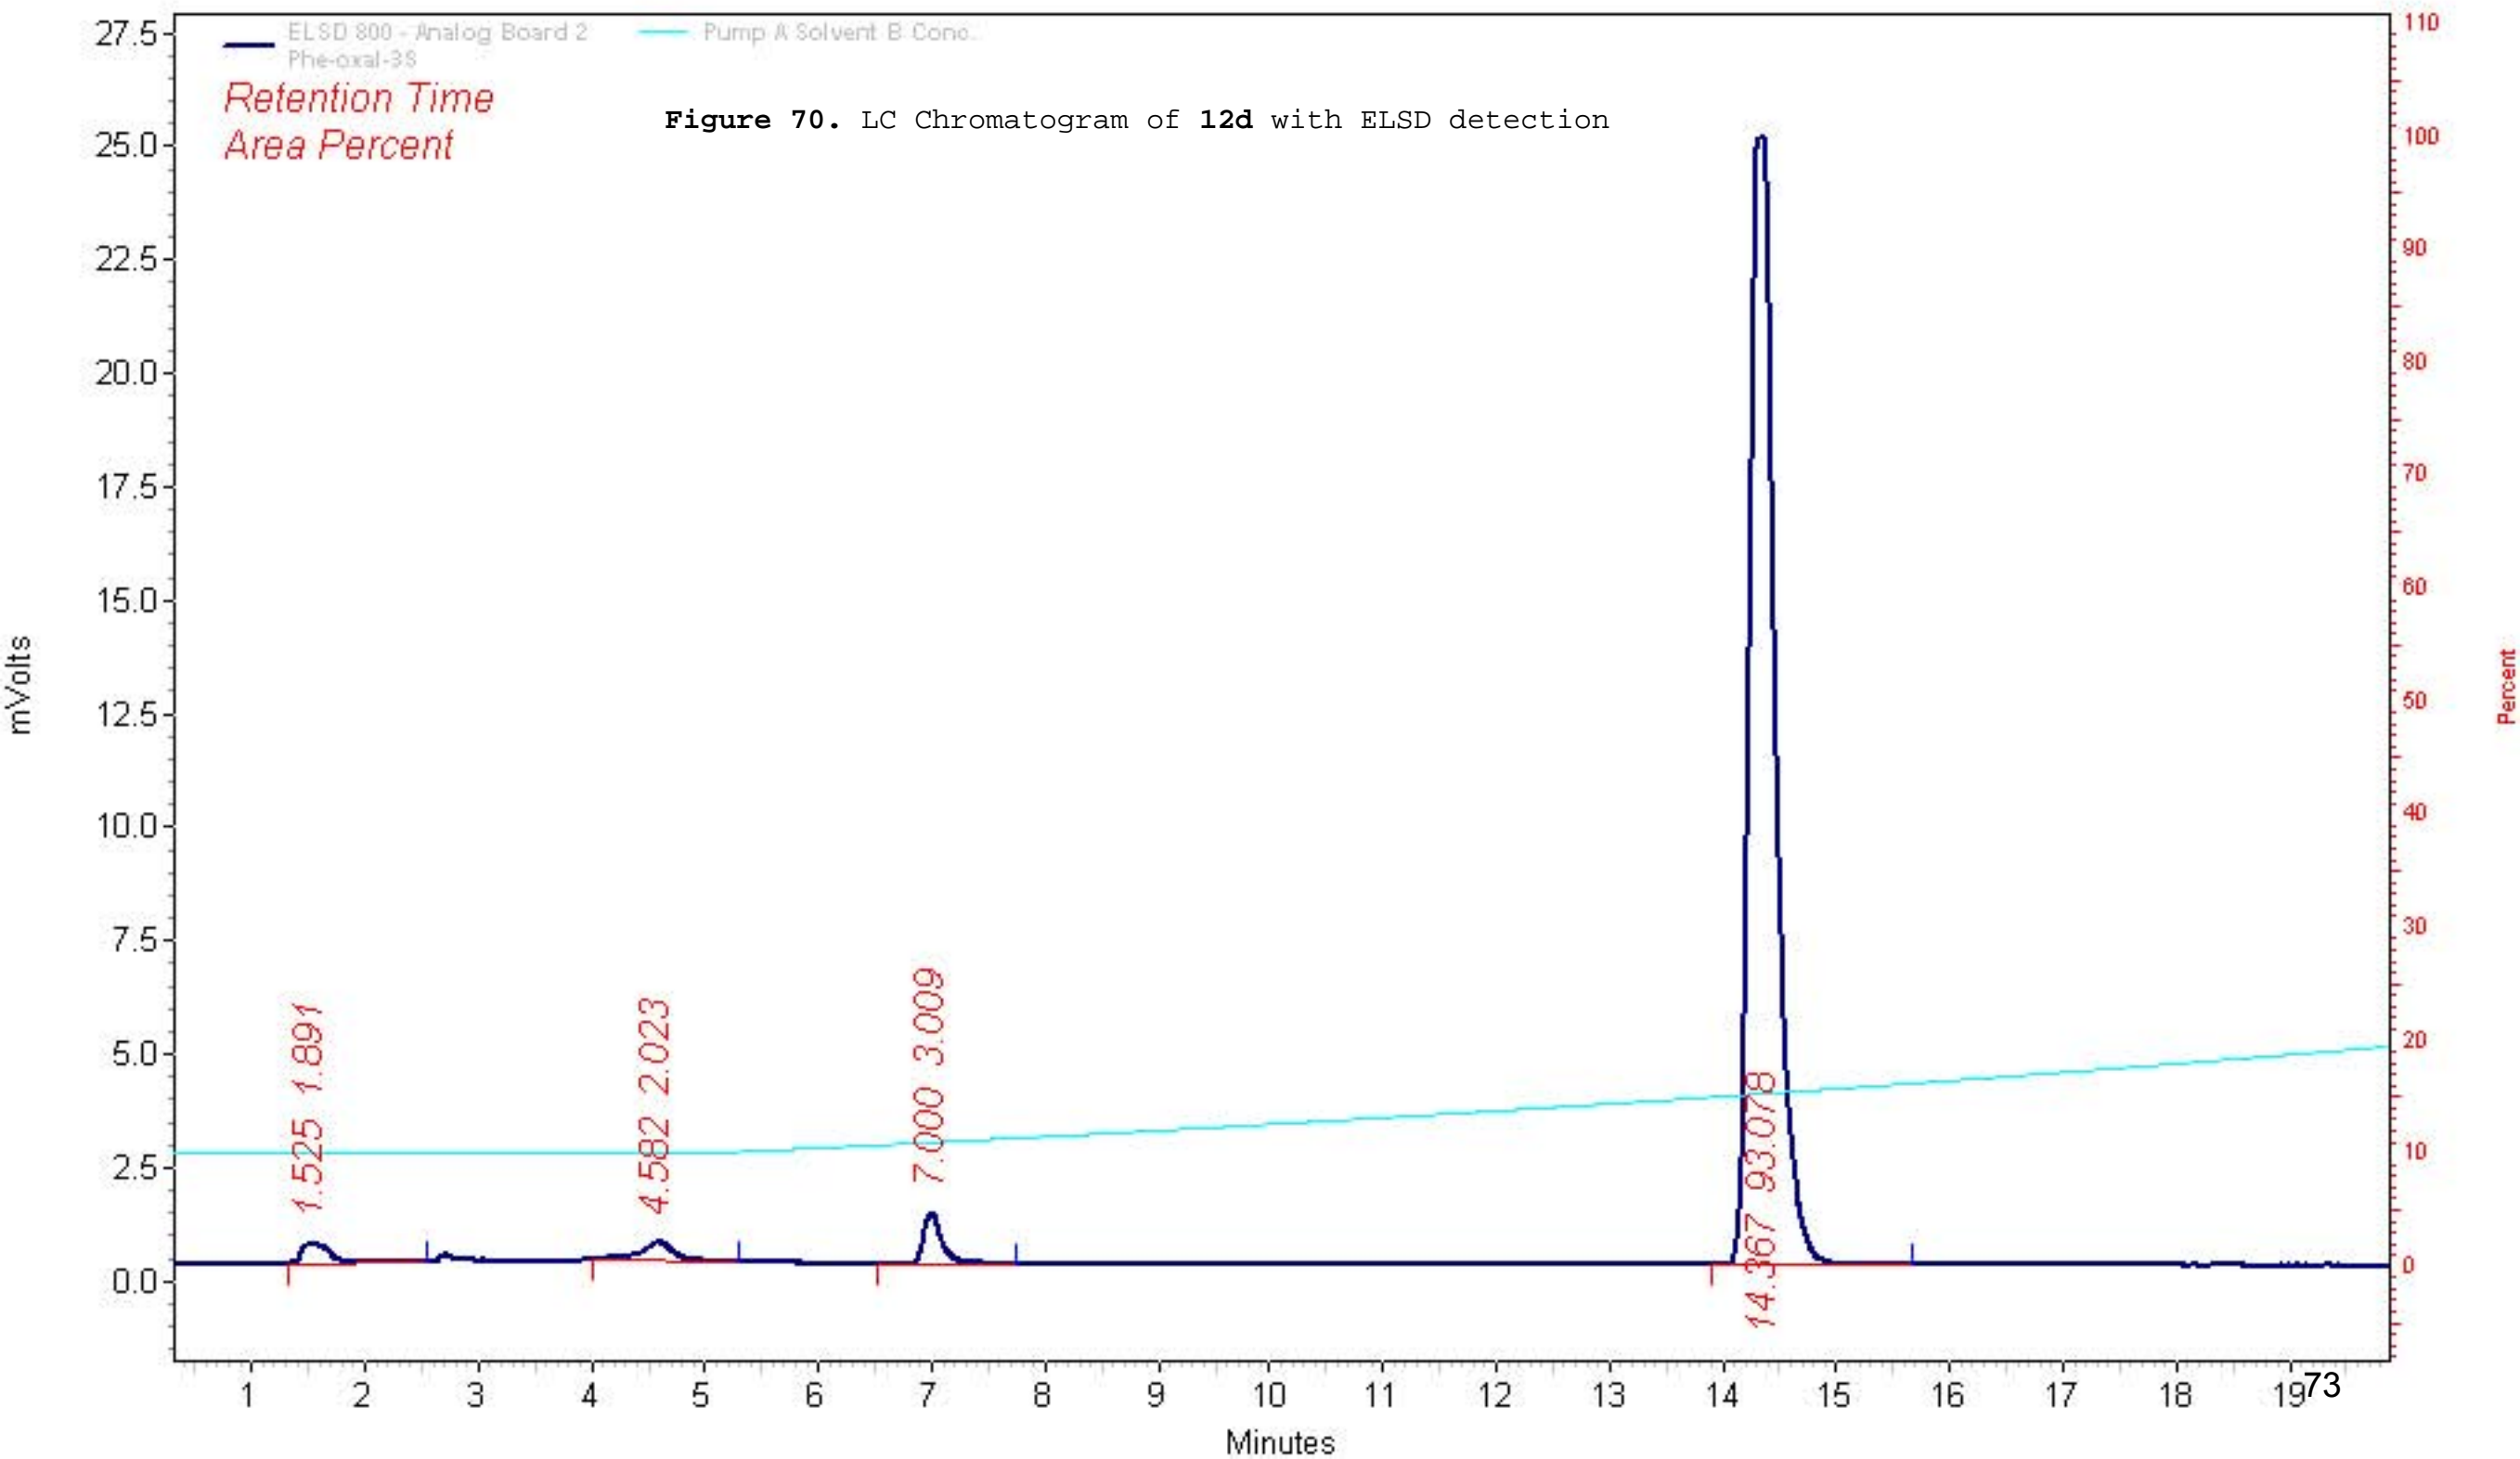

Supplement: NIHMS86475-supplement-1_si_001.pdf [file NIHMS86475-supplement-1_si_001.pdf]
