# Supplementary material
Source: PubMed Central journal article supplement (PMC2765571)

**Supporting Information To Accompany:**

**A Simple Nanoscale Method for Determining the  
Relative Stereochemistry of Statine Units.**

*Alejandro Preciado, Philip G. Williams*

Department of Chemistry, University of Hawaii at Manoa, Honolulu, Hawaii 96822

philipwi@hawaii.edu

**General Experimental Procedures.** Optical rotations were measured at the sodium line (589 nm). IR bands were measured as a thin film on a NaCl disc. NMR spectra were acquired at 500 or 125 Mz using the residual solvent signals as an internal reference ( $\text{CDCl}_3$   $\delta_{\text{H}}$  7.24 ppm,  $\delta_{\text{C}}$  77.0 ppm). High-resolution mass spectral data were obtained using the ESI or APCI mode.

**General Procedure for Production BOC- $\beta$ -keto- $\gamma$ -amino *t*-butyl esters.** One gram of the protected amino acid (1 eq.) was dissolved in 20 mL of dry THF. To this solution was added 1.1 eq. of 1,1'-carbonyldiimidazole (recrystallized from THF) with stirring under dry nitrogen at room temperature. Butyl lithium (2.2M hexane solution, 3.3 equivalents) under nitrogen was diluted with 20 mL of THF and cooled to 0°C with an ice bath. To this was added dropwise diisopropylamine (3.6 equivalents). After stirring for ten minutes at 0°C, the solution was diluted with 70 mL of THF and cooled to -78°C. To the LDA solution was added either *t*-butyl acetate or allyl acetate (3.5 equivalents). After ten minutes, the BOC-amino acid/imidazole solution was cooled to -78°C and cannulated into the enolate solution under nitrogen. The reaction was allowed to stir for 30 minutes at -78°C then quenched with 50 mL of 10% citric acid and allowed to warm to room temperature. The aqueous solution was extracted with 200 mL EtOAc (4x 50 mL) and washed with 100 mL saturated  $\text{NaHCO}_3$  (2x50 mL), 50 mL brine, and dried over  $\text{MgSO}_4$ . The solvent was evaporated and crude material purified on silica mixtures of hexane/EtOAc).

**General procedure for Redution to Statine Amino Units.** To a flame dried flask was added 0.5 g (1 eq.) of BOC- $\beta$ -keto- $\gamma$ -amino *t*-butyl ester dissolved in 20 mL dry THF and cooled to -78°C under nitrogen. To this solution was added 1.3 eq of  $\text{LiBH}_4$  (recrystallized from  $\text{Et}_2\text{O}$ ) which was stirred at -78°C until the reaction reached completion by as determined by TLC. The reaction was quenched by the addition of 1 N HCl and allowed to warm to room temperature over 15 min. This aqueous solution was extracted with 60 mL  $\text{Et}_2\text{O}$  (3x20 mL) and then dried over  $\text{MgSO}_4$ . Purification over silica eluting with Hexane/EtOAc provided a mixture of diastereomers. HPLC purification on silica provided pure diastereomers as needed.

## Physical Data:

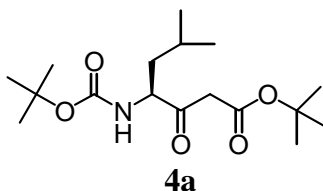

***t*-Butyl 4(*S*)-[(*tert*-butoxycarbonyl)-amino]-6-methyl-3-oxoheptanoate (4a):** amorphous powder:  $[\alpha]_D^{26} = -4.4$  (c 10, CHCl<sub>3</sub>); IR (film)  $\nu_{\max}$ : 3349, 1722, 1705, 1689 cm<sup>-1</sup>; <sup>1</sup>H NMR (CDCl<sub>3</sub> at room temperature)  $\delta$  4.90 (d,  $J = 9.8$  Hz, 1H),  $\delta$  4.31 (m, 1H),  $\delta$  3.49 (d,  $J = 15.7$  Hz, 1H),  $\delta$  3.40 (d,  $J = 15.6$  Hz, 1H),  $\delta$  1.68 (m, 3H),  $\delta$  1.47 (s, 9H),  $\delta$  1.42 (s, 9H),  $\delta$  0.94 (d,  $J = 6.0$  Hz, 3H),  $\delta$  0.91 (d,  $J = 6.0$  Hz, 3H); <sup>13</sup>C NMR 203.4, 166.2, 155.5, 82.0, 79.9, 58.1, 40.3, 39.8, 28.2, 27.8, 24.7, 23.2, 21.5; HRESI-MS  $m/z$  352.2093 [M + Na]<sup>+</sup> [Calc. for C<sub>17</sub>H<sub>31</sub>NO<sub>5</sub>Na<sup>+</sup>, 352.2100, error 0.4 ppm].

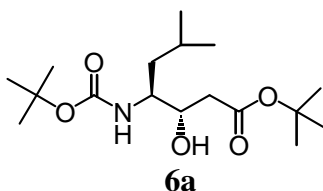

***t*-Butyl 4(*S*)-[(*tert*-butoxycarbonyl)-amino]-3(*S*)-hydroxy-6-methylheptanoate (6a):** amorphous powder;  $[\alpha]_D^{29} = -35$  (c 1, CHCl<sub>3</sub>); IR (film)  $\nu_{\max}$ : 3441, 3362, 1710, 1155 cm<sup>-1</sup>; <sup>1</sup>H NMR (CDCl<sub>3</sub> at room temperature)  $\delta$  4.70 (d,  $J = 9.8$  Hz, 1H),  $\delta$  3.96 (m, 1H),  $\delta$  3.60 (m, 1H),  $\delta$  3.39 (d,  $J = 4.6$  Hz, 1H),  $\delta$  2.47 (dd,  $J = 16.8, 10.2$  Hz, 1H),  $\delta$  2.34 (dd,  $J = 16.8, 2.4$  Hz, 1H),  $\delta$  1.85 (m, 1H),  $\delta$  1.46 (s, 9H),  $\delta$  1.43 (s, 9H),  $\delta$  1.30 (m, 2H),  $\delta$  0.92 (d,  $J = 5.9$  Hz, 6H); <sup>13</sup>C NMR 172.3, 165.0, 81.4, 79.4, 71.3, 52.6, 39.0, 38.6, 28.3, 28.0, 24.7, 23.7, 21.5; HRESI-MS  $m/z$  354.2246 [M + Na]<sup>+</sup> [Calc. for C<sub>17</sub>H<sub>33</sub>NO<sub>5</sub>Na<sup>+</sup>, 354.2257, 1.2 ppm error].

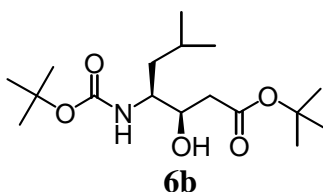

***t*-Butyl 4(*S*)-[(*tert*-butoxycarbonyl)-amino]-3(*R*)-hydroxy-6-methylheptanoate (6b):** amorphous powder;  $[\alpha]_D^{27} = -16.3$  (c 1.5, CHCl<sub>3</sub>); IR (film)  $\nu_{\max}$ : 3365, 1712 cm<sup>-1</sup>; <sup>1</sup>H NMR (CDCl<sub>3</sub> at room temperature)  $\delta$  4.60 (d,  $J = 9.8$  Hz, 1H),  $\delta$  3.96 (m, 1H),  $\delta$  3.62 (m, 1H),  $\delta$  3.43 (d,  $J = 8.9$  Hz, 1H),  $\delta$  2.47 (dd,  $J = 16.4, 2.2$  Hz, 1H),  $\delta$  2.34 (dd,  $J = 16.4, 8.9$  Hz, 1H),  $\delta$  1.66 (m, 1H),  $\delta$  1.45 (s, 9H),  $\delta$  1.43 (s, 9H),  $\delta$  1.29 (m, 2H),  $\delta$  0.92 (d,  $J = 6.7$  Hz, 3H),  $\delta$  0.89 (d,  $J = 6.5$  Hz, 3H); <sup>13</sup>C NMR 172.3, 156.0, 81.3, 79.4, 71.3, 52.6, 39.0, 38.6, 28.4, 28.1, 24.7, 23.7, 21.6; HRESI-MS  $m/z$  354.2120 [M+Na]<sup>+</sup> [Calc. for C<sub>17</sub>H<sub>33</sub>NO<sub>5</sub>Na<sup>+</sup>, 354.2099, 4.3 ppm error].

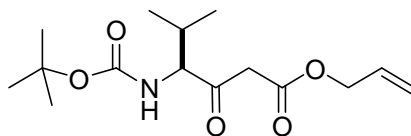

**4b**

**Allyl 4(S)-[(*tert*-butoxycarbonyl)-amino]-5-methyl-3-oxohexanoate (4b):** amorphous powder:  $[\alpha]_D^{27} = +8.5$  (c 5.4, CHCl<sub>3</sub>); UV (*i*-PrOH)  $\lambda_{\max}$  (log  $\epsilon$ ) 248 (8.10) nm; IR (film)  $\nu_{\max}$ : 3369, 1749, 1246, 1168 cm<sup>-1</sup>; <sup>1</sup>H NMR (CDCl<sub>3</sub> at room temperature)  $\delta$  5.90 (ddt,  $J=17.2, 10.4, 5.6$  Hz, 1H),  $\delta$  5.33 (dd,  $J=17.2, 1.5$  Hz, 1H),  $\delta$  5.28 (dd,  $J=10.4, 1.5$  Hz, 1H),  $\delta$  5.06 (d,  $J=8.3$  Hz, 1H),  $\delta$  4.63 (d,  $J=5.6$  Hz, 2H),  $\delta$  4.32 (dd,  $J=8.7, 4.1$  Hz, 1H),  $\delta$  3.57 (s, 2H),  $\delta$  2.24 (m, 1H),  $\delta$  1.48 (s, 9H),  $\delta$  1.01 (d,  $J=6.8$  Hz, 3H),  $\delta$  0.82 (d,  $J=6.8$  Hz, 3H); <sup>13</sup>C NMR 202.0, 166.2, 155.7, 131.5, 80.0, 66.0, 64.3, 47.0, 29.5, 28.2, 19.8, 16.7; HRESI-MS  $m/z$  322.1636 [M+Na]<sup>+</sup> [Calc. for C<sub>15</sub>H<sub>25</sub>NO<sub>5</sub>Na<sup>+</sup>, 322.1631, -3.8 ppm error].

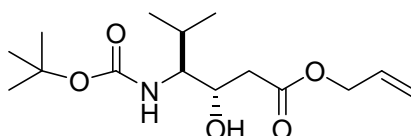

**7a**

**Allyl 4(S)-[(*tert*-butoxycarbonyl)-amino]-5-methyl-3(S)-hydroxyhexanoate (7a):** amorphous powder:  $[\alpha]_D^{27} = -1.7$  (c 1.0, CHCl<sub>3</sub>); UV (*i*-PrOH)  $\lambda_{\max}$  (log  $\epsilon$ ) 248 (8.10) nm; IR (film)  $\nu_{\max}$ : 3375, 1715, 1506, 1261, 1172 cm<sup>-1</sup>; <sup>1</sup>H NMR (CDCl<sub>3</sub> at room temperature)  $\delta$  5.90 (ddt,  $J=17.2, 10.4$  Hz, 1H),  $\delta$  5.33 (dq,  $J=17.2, 1.5$  Hz, 1H),  $\delta$  5.26 (dd,  $J=10.4, 1.5$  Hz, 1H),  $\delta$  4.83 (d,  $J=9.8$  Hz, 1H),  $\delta$  4.60 (dt,  $J=5.8, 1.5$  Hz, 2H),  $\delta$  4.20 (br. d,  $J=9.4$  Hz, 1H),  $\delta$  3.20 (d,  $J=2.6$  Hz, 1H),  $\delta$  3.15 (dt,  $J=10.5, 1.7$  Hz, 1H),  $\delta$  2.60 (dd,  $J=16.9, 9.8$  Hz, 1H),  $\delta$  2.51 (dd,  $J=16.9, 3.2$  Hz, 1H),  $\delta$  1.86 (dm, 1H),  $\delta$  1.43 (m, 9H),  $\delta$  0.99 (d,  $J=6.7$  Hz, 3H),  $\delta$  0.96 (d,  $J=6.8$  Hz, 3H); <sup>13</sup>C NMR: 173.3, 156.4, 131.7, 118.7, 79.2, 67.0, 65.5, 59.6, 39.0, 30.3, 29.7, 28.4, 19.8, 19.5; HRESI-TOF  $m/z$  324.1767 [M + Na]<sup>+</sup> [Calc. for C<sub>15</sub>H<sub>27</sub>NO<sub>5</sub>Na<sup>+</sup>, 324.1787, -4.5 ppm error].

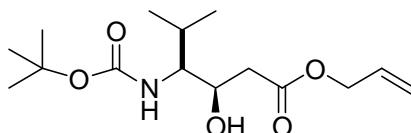

**7b**

**Allyl 4(S)-[(*tert*-butoxycarbonyl)-amino]-5-methyl-3(R)-hydroxyhexanoate (7b):**  $[\alpha]_D^{24} = +7.9$  (c 1.0, CHCl<sub>3</sub>); UV (*i*-PrOH)  $\lambda_{\max}$  (log  $\epsilon$ ) 203 nm (7.56), 205 nm (5.54); IR (Film)  $\nu_{\max}$ : 3456, 3369, 1696 cm<sup>-1</sup>; <sup>1</sup>H NMR (CDCl<sub>3</sub> at room temperature)  $\delta$  5.98 (ddt,  $J=17.2, 10.4, 5.8$  Hz, 1H),  $\delta$  5.33 (ddt,  $J=17.2, 2.7, 1.5$  Hz, 1H),  $\delta$  5.24 (dd,  $J=10.4, 1.1$  Hz, 1H),  $\delta$  4.57 (dt,  $J=5.8, 1.3$  Hz, 2H),  $\delta$  4.50 (d,  $J=9.6$  Hz, 1H),  $\delta$  3.89 (td,  $J=8.4, 2.9$  Hz, 1H),  $\delta$  3.49 (m, 1H),  $\delta$  2.58 (dd,  $J=16.5, 2.9$  Hz, 1H),  $\delta$  2.46 (dd,  $J=16.5, 8.8$  Hz, 1H),  $\delta$  2.09 (m, 1H),  $\delta$  1.43 (m, 9H),  $\delta$  0.94 (d,  $J=6.9$  Hz, 3H),  $\delta$  0.88 (d,  $J=6.8$  Hz, 3H); <sup>13</sup>C NMR 172.9, 156.4, 131.8, 118.6, 79.6, 69.2, 65.5, 58.8, 38.3, 28.3, 27.5, 20.1, 16.3; HRESI-TOF  $m/z$  302.1955 [M + H]<sup>+</sup> [Calc. for C<sub>15</sub>H<sub>28</sub>NO<sub>5</sub><sup>+</sup>, 302.1962, 2.4 ppm error].

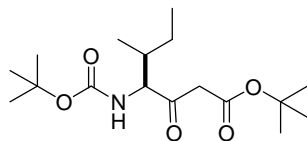

**4c**

***t*-Butyl 4(*S*)-[(*tert*-butoxycarbonyl)-amino]-4-methyl-3-oxoheptanoate (4c):** amorphous powder;  $[\alpha]_D^{27} = -16.3$  (c 1.5, CHCl<sub>3</sub>); IR (film)  $\nu_{\max}$ : 3345, 1713, 1161 cm<sup>-1</sup>; <sup>1</sup>H NMR (CDCl<sub>3</sub> at room temperature)  $\delta$  5.10 (d,  $J = 8.6$  Hz, 1H),  $\delta$  4.27 (m, 1H),  $\delta$  3.37 (m, 2H),  $\delta$  1.90 (m, 1H),  $\delta$  1.40 (s, 9H),  $\delta$  1.37 (s, 9H),  $\delta$  1.24 (m, 2H),  $\delta$  0.92 (d,  $J = 6.7$  Hz, 3H),  $\delta$  0.83 (t,  $J = 7.3$  Hz, 3H); <sup>13</sup>C NMR 202.7, 165.9, 155.7, 82.2, 79.9, 64.4, 48.5, 36.4, 28.3, 27.9, 24.1, 16.0, 11.7; HRESI-MS  $m/z$  352.2107 [M + Na]<sup>+</sup> [Calc. for C<sub>17</sub>H<sub>31</sub>NO<sub>5</sub>Na<sup>+</sup>, 352.2100, error +1.9 ppm].

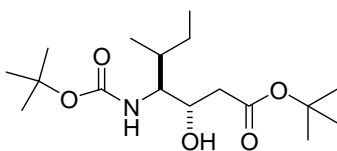

**8a**

***t*-Butyl 4(*S*)-[(*tert*-butoxycarbonyl)-amino]-3(*S*)-hydroxy-6-methylheptanoate (8a):** amorphous powder;  $[\alpha]_D -17.5$  (0.002, MeOH); IR (Film)  $\nu_{\max}$ : 3446, 3389, 1716, 1155 cm<sup>-1</sup>; <sup>1</sup>H NMR (CDCl<sub>3</sub> at room temperature)  $\delta$  4.83 (d,  $J = 10.0$  Hz, 1H),  $\delta$  4.21 (d,  $J = 10.0$  Hz, 1H),  $\delta$  3.37 (s, 1H),  $\delta$  3.19 (t,  $J = 9.4$  Hz, 1H),  $\delta$  2.48 (dd,  $J = 10.1, 16.8$  Hz, 1H),  $\delta$  2.40 (dd,  $J = 16.8, 2.8$  Hz, 1H),  $\delta$  1.87 (m, 1H),  $\delta$  1.46 (s, 9H),  $\delta$  1.43 (s, 9H),  $\delta$  1.25 (m, 2H),  $\delta$  0.91 (s, 9H),  $\delta$  0.83 (t,  $J = 7.3$  Hz, 3H); <sup>1</sup>H NMR (DMSO at room temperature)  $\delta$  6.06 (d,  $J = 9.9$  Hz, 1H),  $\delta$  4.56 (d,  $J = 7.3$  Hz, 1H),  $\delta$  4.02 (ddd,  $J = 8.4, 7.1, 1.9$  Hz, 1H),  $\delta$  3.12 (td,  $J = 9.8, 1.7$  Hz, 1H),  $\delta$  2.21 (m, 2H),  $\delta$  1.52 (m, 3H),  $\delta$  1.38 (s, 9H),  $\delta$  1.37 (s, 9H),  $\delta$  0.86 (d,  $J = 6.7$  Hz, 3H),  $\delta$  0.83 (t,  $J = 7.3$  Hz, 3H); <sup>13</sup>C NMR 173.3, 156.4, 81.5, 79.0, 66.9, 58.0, 39.9, 36.6, 28.3, 28.1, 25.6, 15.7, 11.2; HRESI-MS  $m/z$  354.2264 [M + Na]<sup>+</sup> [Calc. for C<sub>17</sub>H<sub>33</sub>NO<sub>5</sub>Na<sup>+</sup>, 354.2264, +2.0 ppm error].

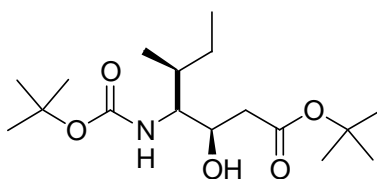

**8b**

***t*-Butyl 4(*S*)-[(*tert*-butoxycarbonyl)-amino]-3(*R*)-hydroxy-6-methylheptanoate (8b):** amorphous powder;  $[\alpha]_D^{26} = -4.4$  (c 10, CHCl<sub>3</sub>); IR (Film)  $\nu_{\max}$ : 3451, 3366, 1705, 1156 cm<sup>-1</sup>; <sup>1</sup>H NMR (CDCl<sub>3</sub> at room temperature)  $\delta$  4.42 (d,  $J = 9.9$  Hz, 1H),  $\delta$  3.93 (m, 1H),  $\delta$  3.53 (m, 1H),  $\delta$  3.38 (d,  $J = 4.4$  Hz, 1H),  $\delta$  2.54 (dd,  $J = 16.4, 2.8$  Hz, 1H),  $\delta$  2.42 (dd,  $J = 16.4, 8.8$  Hz, 1H),  $\delta$  1.79 (m, 1H),  $\delta$  1.57 (m, 2H),  $\delta$  1.45 (s, 9H),  $\delta$  1.42 (s, 9H),  $\delta$  0.89 (m, 6H); <sup>1</sup>H NMR (DMSO at room temperature)  $\delta$  4.73 (d,  $J = 7.1$  Hz, 1H),  $\delta$  3.82 (m, 1H),  $\delta$  2.26 (dd,  $J = 8.4, 4.5$  Hz, 1H);  $\delta$  2.32 (dd,  $J = 15.1, 2.8$  Hz, 1H),  $\delta$  2.06 (dd,  $J = 15.1, 9.6$  Hz, 1H),  $\delta$  1.60 (m, 1H),  $\delta$  1.46 (m, 2H),  $\delta$  1.39 (s, 9H),  $\delta$  1.36 (s, 9H),  $\delta$  0.82 (t,  $J = 7.1$  Hz, 3H),  $\delta$  0.78 (d,  $J = 6.8$  Hz, 3H); <sup>13</sup>C NMR 11.7, 16.3, 23.2, 28.0, 28.3, 34.5, 39.3, 58.8, 68.9, 79.3, 81.2, 156.3, 173.6; HRESI-MS  $m/z$  354.2247 [M + Na]<sup>+</sup> [Calc. for C<sub>17</sub>H<sub>33</sub>NO<sub>5</sub>Na<sup>+</sup>, 354.2256, -2.7 ppm error].

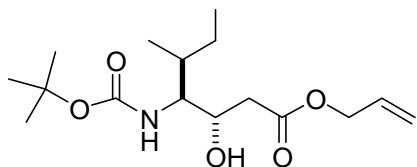

**9a**

**Allyl 4(S)-[(*tert*-butoxycarbonyl)-amino]- 3(S)-hydroxy-6-methylheptanoate (9a):** amorphous powder;  $[\alpha]_D$   $-40.3$  (0.2, MeOH); IR (Film)  $\nu_{\max}$  3444, 3388, 1717, 1505, 1176  $\text{cm}^{-1}$ ;  $^1\text{H}$  NMR ( $\text{CDCl}_3$  at room temperature)  $\delta$  5.94 (m, 1H),  $\delta$  5.35 (d,  $J=17.3$  Hz, 1H),  $\delta$  5.28 (d,  $J=10.4$  Hz, 1H),  $\delta$  4.85 (d,  $J=9.9$  Hz, 1H),  $\delta$  4.64 (d,  $J=5.6$  Hz, 2H),  $\delta$  4.30 (d,  $J=9.6$  Hz, 1H),  $\delta$  3.24 (m, 2H),  $\delta$  2.62 (dd,  $J=16.9, 9.9$  Hz, 1H),  $\delta$  2.50 (dd,  $J=16.9, 2.5$ , 1H),  $\delta$  1.60 (m, 1H),  $\delta$  1.22 (m, 2H),  $\delta$  0.98 (d,  $J=6.6$  Hz, 3H),  $\delta$  0.91 (t,  $J=7.3$  Hz, 3H).  $^{13}\text{C}$  NMR 174.2, 160.2, 131.5, 118.6, 66.8, 65.3, 57.9, 38.8, 36.3, 28.2, 25.4, 15.6, 11.0; HRESI-MS  $m/z$  338.1945  $[\text{M} + \text{Na}]^+$  [Calc. for  $\text{C}_{16}\text{H}_{29}\text{NO}_5\text{Na}^+$ , 338.1943,  $-2.3$  ppm error].

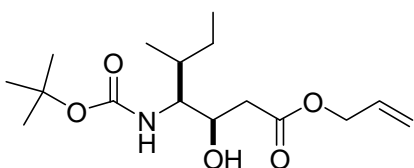

**9b**

**Allyl 4(S)-[(*tert*-butoxycarbonyl)-amino]- 3(R)-hydroxy-6-methylheptanoate (9b):** amorphous powder;  $[\alpha]_D$   $+9.2$  (0.2, MeOH); IR (Film)  $\nu_{\max}$  3436, 3362, 1711, 1519, 1168  $\text{cm}^{-1}$ ;  $^1\text{H}$  NMR ( $\text{CDCl}_3$  at room temperature)  $\delta$  5.92 (m, 1H),  $\delta$  5.33 (d,  $J=17.2$  Hz, 1H),  $\delta$  5.23 (d,  $J=10.4$  Hz, 1H),  $\delta$  4.62 (d,  $J=5.7$  Hz, 2H),  $\delta$  4.40 (d,  $J=9.8$  Hz, 2H),  $\delta$  4.02 (d,  $J=7.0$  Hz, 1H),  $\delta$  3.57 (m, 1H),  $\delta$  2.61 (dd,  $J=16.4, 10.8$  Hz, 1H),  $\delta$  2.48 (dd,  $J=16.4, 2.4$ , 1H),  $\delta$  1.87 (m, 1H),  $\delta$  1.78 (m, 2H),  $\delta$  0.98 (d,  $J=6.7$  Hz, 3H),  $\delta$  0.91 (t,  $J=7.3$  Hz, 3H); HRESI-MS  $m/z$  338.1956  $[\text{M} + \text{Na}]^+$  [Calc. for  $\text{C}_{16}\text{H}_{29}\text{NO}_5\text{Na}^+$ , 338.1943,  $-5.7$  ppm error].

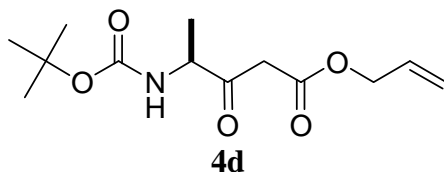

**Allyl 4(S)-[(*tert*-butoxycarbonyl)-amino]-3-oxopentanoate (4d):** amorphous powder  $[\alpha]_D^{27} = +3.73$  (c 10, CHCl<sub>3</sub>), UV (ethyl acetate)  $\lambda_{\max}$  (log  $\epsilon$ ) 257 nm (7.42); IR (Film)  $\nu_{\max}$ : 3375, 1713, 1690, 1648, 1512 cm<sup>-1</sup>; <sup>1</sup>H NMR (CDCl<sub>3</sub> at room temperature)  $\delta$  5.90 (ddt,  $J=17.2, 10.4, 5.8$  Hz, 1H),  $\delta$  5.34 (ddd,  $J=17.7, 3.3, 1.5$  Hz, 1H),  $\delta$  5.25 (ddd,  $J=17.7, 2.3, 1.2$  Hz, 1H),  $\delta$  5.10 (d,  $J=7.1$  Hz, 1H),  $\delta$  4.60 (dt,  $J=5.8, 1.4$  Hz, 2H),  $\delta$  4.37 (p,  $J=7.4, 7.2$  Hz, 1H),  $\delta$  3.60 (d,  $J=16.1$  Hz, 1H),  $\delta$  3.56 (d,  $J=16.1$  Hz, 1H),  $\delta$  1.43 (s, 9H),  $\delta$  1.35 (d,  $J=7.2$  Hz, 3H); <sup>13</sup>C NMR 202.3, 166.6, 155.2, 131.4, 118.9, 80.1, 66.0, 55.4, 45.7, 28.3, 16.9; HRESI-MS  $m/z$  294.1340 [M+Na]<sup>+</sup> [Calc. for C<sub>13</sub>H<sub>21</sub>NO<sub>5</sub>Na<sup>+</sup>, 294.1320, -1.9 ppm error].

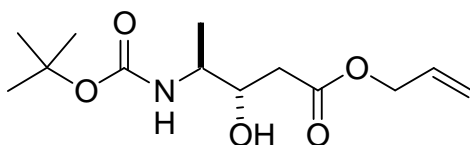

**Allyl 4(S)-[(*tert*-butoxycarbonyl)-amino]-3(S)-hydroxypentanoate (10a):** amorphous powder,  $[\alpha]_D^{26} = -17.4$  (c 1, CHCl<sub>3</sub>), UV (*i*-PrOH)  $\lambda_{\max}$  (log  $\epsilon$ ) 238 nm (6.04); IR (Film)  $\nu_{\max}$ : 3375, 1713, 1690, 1648, 1512 cm<sup>-1</sup>; <sup>1</sup>H NMR (CDCl<sub>3</sub> at room temperature)  $\delta$  5.90 (ddt,  $J=17.2, 10.4, 5.8$  Hz, 1H),  $\delta$  5.32 (dq,  $J=17.2, 1.5$  Hz, 2H),  $\delta$  5.31 (br. d,  $J=10.4$  Hz, 1H),  $\delta$  4.80 (br s, 1H),  $\delta$  4.62 (d,  $J=5.9$  Hz, 2H),  $\delta$  3.99 (br. s, 1H),  $\delta$  3.66 (m, 1H),  $\delta$  3.32 (br s, 1H),  $\delta$  2.54 (m, 2H),  $\delta$  1.43 (s, 9 H),  $\delta$  1.21 (d,  $J=6.7$  Hz, 3H); <sup>1</sup>H NMR (acetone-*d*<sub>6</sub> at room temperature)  $\delta$  6.24 (ddt,  $J=17.2, 10.9, 5.5$  Hz, 1H),  $\delta$  5.90 (br d,  $J=6.9$  Hz, 1H),  $\delta$  5.60 (dq,  $J=17.4, 1.4$  Hz, 1H),  $\delta$  5.48 (dq,  $J=17.3, 1.6$  Hz, 1H),  $\delta$  4.87 (dt,  $J=5.4, 1.5$  Hz, 2H),  $\delta$  4.45 (d, 5.5 Hz, 1H),  $\delta$  4.44 (m, 1H),  $\delta$  4.00 (m, 1H),  $\delta$  2.84 (dd,  $J=15.6, 4.4$  Hz, 1H),  $\delta$  2.77 (dd,  $J=15.6, 8.9$  Hz, 1H),  $\delta$  1.74 (s, 9H),  $\delta$  1.46 (d, 6.9 Hz, 3H), <sup>1</sup>H NMR (DMSO at room temperature)  $\delta$  6.48 (d,  $J=8.4$  Hz, 1H),  $\delta$  5.91 (ddt,  $J=17.2, J=10.4, J=5.8$  Hz, 1H),  $\delta$  5.30 (br. d,  $J=17.3$  Hz, 1H),  $\delta$  5.19 (br. d,  $J=10.5$  Hz, 1H),  $\delta$  4.89 (d,  $J=5.9$  Hz, 1H),  $\delta$  4.54 (d,  $J=4.3$  Hz, 2H),  $\delta$  3.85 (m, 1H),  $\delta$  3.54 (br.m, 1H),  $\delta$  2.46 (dd,  $J=15.6, 2.9$  Hz, 1H),  $\delta$  2.21 (dd,  $J=15.1, 9.7$  Hz, 1H),  $\delta$  1.40 (s, 9H),  $\delta$  0.98 (d,  $J=6.8$  Hz, 3H); 172.6, 155.8, 131.7, 118.5, 79.3, 70.5 65.4, 49.7, 38.7, 28.3, 18.2; HRESI-MS  $m/z$  296.1482 [M+Na]<sup>+</sup> [Calc. for C<sub>13</sub>H<sub>23</sub>NO<sub>5</sub>Na<sup>+</sup>, 296.1474, -4.9 ppm error].

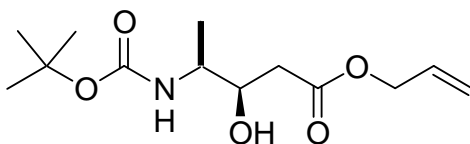

**Allyl 4(S)-[(*tert*-butoxycarbonyl)-amino]-3(R)-hydroxypentanoate (10b):** amorphous powder,  $[\alpha]_D^{31} = +1.6$  (c 1, CHCl<sub>3</sub>); UV (*i*-PrOH)  $\lambda_{\max}$  (log  $\epsilon$ ) 206 nm (6.99), 278 nm (5.85); IR (Film)  $\nu_{\max}$ : 3376, 1716, 1699, 1684, 1259, 1160 cm<sup>-1</sup>; <sup>1</sup>H NMR (CDCl<sub>3</sub> at room temperature)  $\delta$  5.93 (ddt,  $J=17.2, 10.4, 5.8$  Hz, 1H),  $\delta$  5.33 (dq,  $J=17.2, 1.5$  Hz, 1H),  $\delta$  5.26 (dq,  $J=10.4, 1.5$  Hz, 1H),  $\delta$  4.74 (d,  $J=6.4$  Hz, 1H),  $\delta$  4.62 (dt,  $J=5.8, 1.3$  Hz, 2H),  $\delta$  4.04 (sext,  $J=4.8, 1H$ ),  $\delta$  3.70 (m, 1H),  $\delta$  3.48 (d,  $J=4.3$  Hz, 1H),  $\delta$  3.35 (br. s, 1H),  $\delta$  2.50 (m, 2H),  $\delta$  1.44 (s, 9 H),  $\delta$  1.13 (d,  $J=6.8$  Hz, 3H); <sup>1</sup>H NMR (DMSO at room temperature)  $\delta$  6.62 (d,  $J=9.1$  Hz, 1H),  $\delta$  5.90 (ddt,  $J=17.2, 10.4, 5.8$  Hz, 1H),  $\delta$  5.30 (dm,  $J=17.3$  Hz, 1H),  $\delta$  5.29 (dm,  $J=10.5$  Hz, 1H),  $\delta$  4.93 (d,  $J=6.0$  Hz, 1H),  $\delta$

4.54 (d,  $J=5.2$  Hz, 1H),  $\delta$  3.73 (m, 1H),  $\delta$  3.31 (m, 1H),  $\delta$  2.46 (dd,  $J=15.2, 3.5$  Hz, 1H),  $\delta$  2.24 (dd,  $J=15.2, 9.9$  Hz, 1H),  $\delta$  1.37 (s, 9H),  $\delta$  0.99 (d,  $J=6.6$  Hz, 1H);  $^{13}\text{C}$  NMR 172.4, 155.8, 131.8, 118.7, 79.3, 70.9, 65.5, 49.6, 38.0, 28.4, 15.2; HRESI-MS  $m/z$  296.1482  $[\text{M}+\text{Na}]^+$  [Calc. for  $\text{C}_{13}\text{H}_{23}\text{NO}_5\text{Na}^+$ , 296.1474, -4.8 ppm].

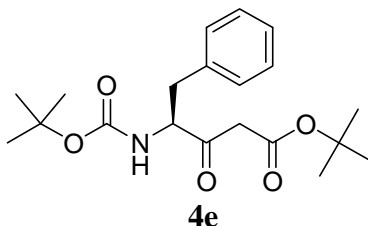

***t*-Butyl 4(S)-[(*tert*-butoxycarbonyl)-amino]-4-phenyl-3-oxopentanoate (4e):** amorphous powder;  $[\alpha]_{\text{D}}^{27} = +3.73$  (c 10,  $\text{CHCl}_3$ ); UV (*i*-PrOH)  $\lambda_{\text{max}}$  (log  $\epsilon$ ) 210 nm (8.85), 244 nm (8.05); IR (Film)  $\nu_{\text{max}}$  3357, 1705, 1689, 1499, 1252, 1167  $\text{cm}^{-1}$ ;  $^1\text{H}$  NMR  $\delta$  7.27 (m, 5H),  $\delta$  5.06 (d,  $J=7.6$  Hz, 2H),  $\delta$  4.58 (q,  $J=7.3$  Hz, 1H),  $\delta$  3.43 (d,  $J=15.9$  Hz, 1H),  $\delta$  3.36 (d,  $J=15.9$  Hz, 1H),  $\delta$  3.16 (dd, 14.1, 6.0 Hz, 1H),  $\delta$  2.98 (dd, 14.1, 7.2 Hz, 1H),  $\delta$  1.46 (s, 9H),  $\delta$  1.40 (s, 9H);  $^{13}\text{C}$  NMR: 202.3, 166.1, 136.2, 19.2, 128.6, 126.9, 82.2, 80.1, 60.4, 48.1, 37.0, 28.2, 27.9; HRESI-MS  $m/z$  386.1941  $[\text{M}+\text{Na}]^+$  [Calc. for  $\text{C}_{20}\text{H}_{29}\text{NO}_5\text{Na}^+$ , 386.1944, -0.7 ppm error].

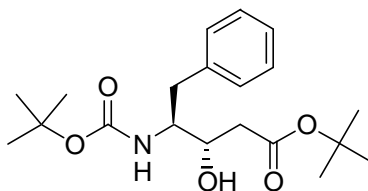

***t*-Butyl 4(S)-[(*tert*-butoxycarbonyl)-amino]-3(S)-hydroxy 4-phenylpentanoate (11a):** amorphous powder;  $[\alpha]_{\text{D}} -36.6$  (c 1, MeOH),  $[\alpha]_{\text{D}}^{27} = -1.3$  (c 1,  $\text{CHCl}_3$ ); UV (MeOH)  $\lambda_{\text{max}}$  (log  $\epsilon$ ) 209 (3.95) nm; IR (Film)  $\nu_{\text{max}}$  : 3365, 1698  $\text{cm}^{-1}$ ;  $^1\text{H}$  NMR ( $\text{CDCl}_3$  at room temperature)  $\delta$  7.24 (m, 5H),  $\delta$  4.98 (d,  $J=9.4$  Hz, 1H),  $\delta$  3.92 (d,  $J=10.5$  Hz, 1H),  $\delta$  3.68 (m, 1H),  $\delta$  2.90 (d,  $J=7.6$  Hz, 2H),  $\delta$  2.51 (dd,  $J=16.9, 10.4$  Hz, 1H),  $\delta$  2.27 (dd,  $J=16.9, 2.4$  Hz, 1H),  $\delta$  1.42 (s, 9H),  $\delta$  1.40 (s, 9H);  $^1\text{H}$  NMR (DMSO at room temperature)  $\delta$  7.22 (m, 5H),  $\delta$  6.45 (d,  $J=9.2$  Hz, 1H),  $\delta$  4.92 (d,  $J=6.2$  Hz, 1H),  $\delta$  3.85 (m, 1H),  $\delta$  3.65 (m, 1H),  $\delta$  2.80 (dd,  $J=13.6, 5.1$  Hz, 1H),  $\delta$  2.56 (dd,  $J=13.5, 9.5$  Hz, 1H),  $\delta$  2.34 (dd,  $J=15.1, 4.2$  Hz, 1H),  $\delta$  2.17 (dd,  $J=15.2, 8.8$  Hz, 1H),  $\delta$  1.37 (s, 9H),  $\delta$  1.30 (s, 9H);  $^{13}\text{C}$  NMR 172.8, 155.7, 138.2, 129.4, 128.3, 126.2, 81.3, 79.2, 66.9, 55.3, 39.6, 38.6, 28.3, 28.0; HRESI-MS  $m/z$  388.2095  $[\text{M}+\text{Na}]^+$  [Calc. for  $\text{C}_{20}\text{H}_{31}\text{NO}_5\text{Na}^+$ , 388.2089, -1.3 ppm error].

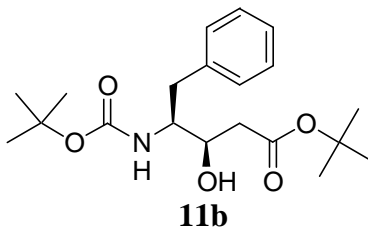

***t*-Butyl 4(S)-[(*tert*-butoxycarbonyl)-amino]-3(R)-hydroxy 4-phenylpentanoate (11b):** amorphous powder;  $[\alpha]_{\text{D}} -14.5$  (c 1, MeOH),  $[\alpha]_{\text{D}}^{28} = 1.9$  (c 1,  $\text{CHCl}_3$ ); UV (MeOH)  $\lambda_{\text{max}}$  (log  $\epsilon$ ) 209 (4.17) nm; IR (Film)  $\nu_{\text{max}}$  : 3367, 1728, 1690, 1158  $\text{cm}^{-1}$ ;  $^1\text{H}$  NMR ( $\text{CDCl}_3$  at room temperature)  $\delta$  7.24 (m, 5H),  $\delta$  4.57 (d,  $J=8.2$  Hz, 1H),  $\delta$  3.99 (m, 1H),  $\delta$  3.82 (m, 1H),  $\delta$  3.66 (br. s, 1H),  $\delta$  2.96 (dd,  $J=13.8, 3.5$  Hz, 1H),  $\delta$  2.83 (dd,  $J=13.7, J=8.4$  Hz, 1H),  $\delta$  2.52 (dd,  $J=16.6, 2.4$  Hz, 1H),  $\delta$  2.40 (dd,  $J=16.5, 8.9$  Hz, 1H),  $\delta$  1.46 (s, 9H),  $\delta$  1.33 (s, 9H);  $^1\text{H}$  NMR



(DMSO at room temperature)  $\delta$  7.20 (m, 5H),  $\delta$  4.56 (br d,  $J=8.8$  Hz, 1H),  $\delta$  3.93 (m, 1H)  $\delta$  3.82 (m, 1H), 3.67 (m, 1H),  $\delta$  3.00 (dd,  $J=14.1, 4.1$  Hz, 1H),  $\delta$  2.88 (dd,  $J=13.4, 9.0$  Hz, 1H),  $\delta$  2.52 (dd,  $J=17.2, 3.0$  Hz, 1H), 2.41 (dd,  $J=16.5, 8.8$  Hz, 1H),  $\delta$  1.40 (s, 9H),  $\delta$  1.33 (s, 9H);  $^{13}\text{C}$ NMR 172.4, 155.6, 137.8, 129.5, 128.3, 126.3, 81.4, 79.4, 70.1, 55.1, 39.2, 35.7, 28.2, 28.0; HRESI-MS  $m/z$  388.2094  $[\text{M}+\text{Na}]^+$  [Calc. for  $\text{C}_{20}\text{H}_{31}\text{NO}_5\text{Na}^+$ , 388.2089, 0.2 ppm error].

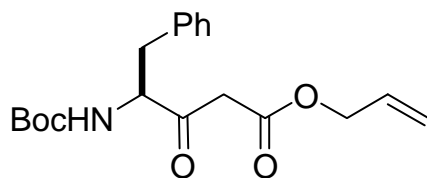

**4f**

**Allyl 4(S)-[(tert-butoxycarbonyl)-amino]-4-phenyl-3-oxopentanoate (4g):** amorphous powder;  $[\alpha]_{\text{D}}^{25} = -6.65$  (c 1,  $\text{CHCl}_3$ ); UV (ethyl acetate)  $\lambda_{\text{max}}$  (log  $\epsilon$ ) 254 nm (7.98), 257 nm (7.94), 288 nm (6.78); IR (Film)  $\nu_{\text{max}}$ : 3345, 1745, 1713, 1690, 1517  $\text{cm}^{-1}$ ;  $^1\text{H}$  NMR ( $\text{CDCl}_3$  at room temperature)  $\delta$  7.32 (m, 5H),  $\delta$  5.93 (ddt,  $J=17.2, 10.4, 5.8$  Hz, 1H),  $\delta$  5.33 (d,  $J=17.2$  Hz, 1H),  $\delta$  5.25 (dm,  $J=10.4$  Hz, 1H),  $\delta$  5.01 (d,  $J=6.7$  Hz, 1H),  $\delta$  4.61 (d,  $J=5.4$  Hz, 2H),  $\delta$  4.52 (m, 1H),  $\delta$  3.63 (d,  $J=16.8$  Hz, 1H),  $\delta$  3.54 (d,  $J=16.2$  Hz, 1H), 3.51 (d,  $J=16.2$  Hz, 1H),  $\delta$  3.15 (dd,  $J=14.0, 6.0$  Hz, 1H),  $\delta$  2.98 (dd,  $J=14.0, 7.4$  Hz, 1H),  $\delta$  1.39 (s, 9H);  $^{13}\text{C}$  NMR 201.7, 166.3, 154.8, 136.0, 131.4, 129.7, 128.5, 126.9, 118.7, 80.0, 65.9, 60.4, 46.6, 36.6, 28.1; HRESI-MS  $m/z$  370.1637  $[\text{M}+\text{Na}]^+$  [Calc. for  $\text{C}_{19}\text{H}_{25}\text{NO}_5\text{Na}$ , 370.1631, -3.5 ppm error].

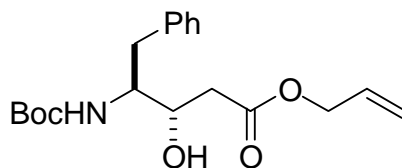

**12a**

**t-Butyl 4(S)-[(tert-butoxycarbonyl)-amino]-3(S)-hydroxy 4-phenylpentanoate (12a):** amorphous powder;  $[\alpha]_{\text{D}}^{22} = -16.5$  (c 1,  $\text{CHCl}_3$ ); UV (*i*-PrOH)  $\lambda_{\text{max}}$  (log  $\epsilon$ ) 206 nm (7.07), 210 nm (7.04); IR (Film)  $\nu_{\text{max}}$  3492, 3358, 1715, 1686, 1519, 1366, 1260, 1166  $\text{cm}^{-1}$ ;  $^1\text{H}$  NMR ( $\text{CDCl}_3$  at room temperature)  $\delta$  7.26 (m, 5H),  $\delta$  5.88 (ddt,  $J=17.2, 10.4, 5.8$  Hz, 1H),  $\delta$  5.28 (dq,  $J=17.2, 1.4$  Hz, 1H),  $\delta$  5.24 (d,  $J=10.4$  Hz, 1H),  $\delta$  4.94 (d,  $J=9.5$  Hz, 1H),  $\delta$  4.57 (d,  $J=5.8$  Hz, 2H),  $\delta$  3.99 (d,  $J=10.0$  Hz, 1H),  $\delta$  3.73 (q,  $J=8.3$  Hz, 1H),  $\delta$  3.42 (br.s, 1H),  $\delta$  2.91 (d,  $J=7.8$  Hz, 2H),  $\delta$  2.63 (dd,  $J=17.1, 10.3$  Hz, 1H),  $\delta$  2.41 (dd,  $J=17.0, 2.6$  Hz, 1H),  $\delta$  1.40 (s, 9H);  $^{13}\text{C}$  NMR 173.2, 155.8, 138.1, 131.6, 129.4, 128.5, 126.4, 118.7, 79.4, 67.0, 65.5, 55.4, 38.6, 28.3; HRESI-MS  $m/z$  350.1958  $[\text{M}+\text{H}]^+$  [Calc. for  $\text{C}_{19}\text{H}_{28}\text{NO}_5$ , 350.1958, 1.3 ppm error].

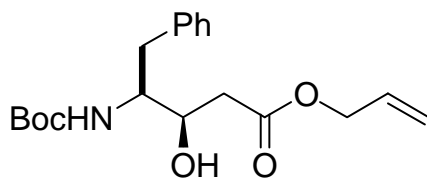

**12b**

***t*-Butyl 4(*S*)-[(*tert*-butoxycarbonyl)-amino]-3(*R*)-hydroxy 4-phenylpentanoate (12b):** amorphous powder;  $[\alpha]_D^{20} = +2.1$  (c 1, CHCl<sub>3</sub>); UV (*i*-PrOH)  $\lambda_{\max}$  (log  $\epsilon$ ) 203 nm (7.22), 211 nm (6.98), 240 nm (5.87); IR (Film)  $\nu_{\max}$  3353, 1734, 1680, 1523, 1270, 1170 cm<sup>-1</sup>; <sup>1</sup>H NMR  $\delta$  7.20 (m, 5H),  $\delta$  5.97 (ddt,  $J=17.2, 10.4, 5.8$  Hz, 1H),  $\delta$  5.38 (dq,  $J=17.3, 1.5$  Hz, 1H),  $\delta$  5.31 (dq,  $J=10.4, 1.5$  Hz, 1H),  $\delta$  4.67 (dt  $J=5.8, 1.4$  Hz, 2H),  $\delta$  4.62 (br d,  $J=8.8$  Hz, 1H),  $\delta$  4.07 (m, 1H)  $\delta$  3.92 (m, 1H),  $\delta$  3.04 (dd,  $J=14.1, 4.6$  Hz, 1H),  $\delta$  2.95 (dd,  $J=14.1, 8.9$  Hz, 1H),  $\delta$  2.78 (dd,  $J=16.4, 3.0$  Hz, 1H), 2.64 (dd,  $J=16.5, 8.8$  Hz, 1H),  $\delta$  1.40 (s, 9H); <sup>13</sup>C NMR 172.5, 155.8, 137.6, 131.7, 129.4, 128.4, 126.4, 118.6, 79.6, 65.5, 64.3, 55.3, 38.3, 35.8, 28.2; HRESI-MS  $m/z$  350.1948 [M+H]<sup>+</sup> [Calc. for C<sub>19</sub>H<sub>28</sub>NO<sub>5</sub>, 350.1958, 4.2 ppm error].

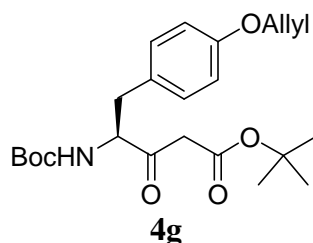

**4g**

***tert*-butyl 5-(4-(allyloxy)phenyl)-4-(*tert*-butoxycarbonylamino)-3-oxopentanoate (4g):**  $[\alpha]_D^{24} = +10$  (c 1, CHCl<sub>3</sub>); UV (*i*-PrOH)  $\lambda_{\max}$  (log  $\epsilon$ ) 205 nm (6.88), 228 nm (6.83), 278 nm (5.66); IR (Film)  $\nu_{\max}$  3364, 1714, 1511, 1246, 1164 cm<sup>-1</sup>; <sup>1</sup>H NMR  $\delta$  7.09 (d,  $J=8.2$  Hz, 2H), 6.93 (d,  $J=8.2$  Hz, 2H), 6.05 (ddt,  $J=17.2, 10.4, 5.8$  Hz, 1H),  $\delta$  5.42 (d,  $J=17.2$  Hz, 1H),  $\delta$  5.35 (d,  $J=10.2$  Hz, 1H),  $\delta$  5.04 (d,  $J=5.9$  Hz, 1H),  $\delta$  4.53 (br. d,  $J=4.1$  Hz, 2H), 4.13 (q,  $J=8.3$  Hz, 1H), 3.74 (br. s, 1H),  $\delta$  3.42 (d,  $J=15.9$  Hz, 1H), 3.38 (d,  $J=15.5$  Hz, 1H),  $\delta$  3.09 (dd,  $J=14.1, 6.4$  Hz, 1H),  $\delta$  2.94 (dd,  $J=13.5, 6.7$  Hz, 1H),  $\delta$  1.47 (s, 9H),  $\delta$  1.41 (s, 9H); <sup>13</sup>C NMR: 202.0, 165.8, 157.1, 154.9, 132.9, 114.4, 81.4, 79.3, 77.4, 68.2, 41.1, 35.4, 27.8, 27.5; HRESI-MS  $m/z$  420.2365 [M+H]<sup>+</sup> [Calc. for C<sub>23</sub>H<sub>34</sub>NO<sub>6</sub>, 420.2381, 3.8 ppm error].

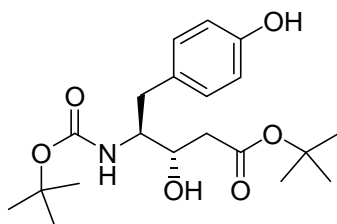

**13a**

***tert*-butyl 5-(4-(allyloxy)phenyl)-4(*S*)-(*tert*-butoxycarbonylamino)-3(*S*)-hydroxypentanoate (13a):**  $[\alpha]_D^{28} = -22.5$  (c 1, CHCl<sub>3</sub>); UV (*i*-PrOH)  $\lambda_{\max}$  (log  $\epsilon$ ) 227 nm (6.53), 279 nm (5.72); IR (Film)  $\nu_{\max}$ : 3363, 1715, 1697, 1684, 1157 cm<sup>-1</sup>; <sup>1</sup>H NMR (CDCl<sub>3</sub> at room temperature)  $\delta$  7.11 (d,  $J=8.3$  Hz, 2H),  $\delta$  6.81 (d,  $J=8.5$  Hz, 2H),  $\delta$  4.99 (d,  $J=9.8$  Hz, 1H),  $\delta$  3.94 (br d,  $J=10.2$ , 1H),  $\delta$  3.73 (m, 1H),  $\delta$  2.83 (d,  $J=7.5$  Hz, 2H),  $\delta$  2.51 (dd,  $J=17.0, 10.4$  Hz, 1H),  $\delta$  2.28 (dd,  $J=17.0, 2.6$  Hz, 1H),  $\delta$  1.44 (s, 9H),  $\delta$  1.42 (s, 9H); <sup>13</sup>C NMR 173.2, 155.9, 154.3 130.5, 130.2 115.3, 81.6, 79.5, 66.8, 55.6, 39.4, 37.8, 28.4, 28.1; HRESI-MS  $m/z$  382.2229 [M + H]<sup>+</sup> [Calc. for C<sub>20</sub>H<sub>32</sub>NO<sub>6</sub><sup>+</sup>, 382.2230, -1.3 ppm error].

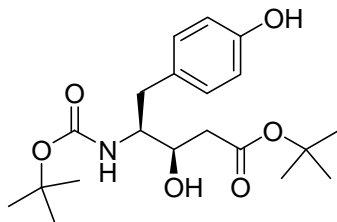

**13b**

**tert-butyl 5-(4-(allyloxy)phenyl)-4(S)-(tert-butoxycarbonylamino)-3(R)-hydroxypentanoate (13b):**  $[\alpha]_D^{28} = +2.4$  (c 1,  $\text{CHCl}_3$ ); UV (*i*-PrOH)  $\lambda_{\text{max}}$  (log  $\epsilon$ ) 226 nm (6.25), 278 nm (5.39); IR (Film)  $\nu_{\text{max}}$ : 3398, 1681, 1649, 1155  $\text{cm}^{-1}$ ;  $^1\text{H}$  NMR  $\delta$  7.08 (d,  $J=8.4$  Hz, 2H),  $\delta$  6.84 (d,  $J=8.5$  Hz, 2H),  $\delta$  4.56 (d,  $J=8.5$  Hz, 1H),  $\delta$  3.93 (m, 1H),  $\delta$  3.78 (m, 1H),  $\delta$  3.64 (m, 1H),  $\delta$  2.88 (dd,  $J=14.2, 4.6$  Hz, 1H),  $\delta$  2.82 (dd,  $J=14.2, 7.8$  Hz, 1H),  $\delta$  2.51 (dd,  $J=16.4, 2.9$  Hz, 1H),  $\delta$  2.41 (dd,  $J=16.6, 8.8$  Hz, 1H),  $\delta$  1.47 (s, 9H),  $\delta$  1.36 (s, 9H);  $^{13}\text{C}$  NMR 172.5, 155.8, 154.5, 130.5, 129.3, 115.3, 81.6, 79.7, 70.0, 55.3, 39.1, 34.9, 28.3, 28.1; HRESI-MS  $m/z$  382.2210  $[\text{M} + \text{H}]^+$  [Calc. for  $\text{C}_{20}\text{H}_{32}\text{NO}_6^+$ , 382.2230, 3.8 ppm error].

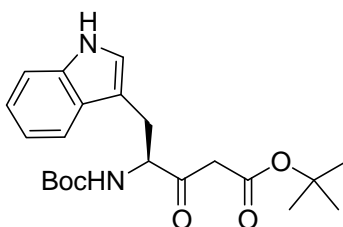

**4h**

**t-Butyl 4(S)-[(tert-butoxycarbonyl)-amino]-4-indole-3-oxopentanoate (4h):** amorphous powder;  $[\alpha]_D^{25} = +3.46$  (c 10,  $\text{CHCl}_3$ ); UV (*i*-PrOH)  $\lambda_{\text{max}}$  (log  $\epsilon$ ) 224 nm (7.75), 282 nm (7.01); IR (Film)  $\nu_{\text{max}}$ : 3402, 1705, 1690, 1164, 743  $\text{cm}^{-1}$ ;  $^1\text{H}$  NMR ( $\text{CDCl}_3$  at room temperature)  $\delta$  8.83 (br. s, 1H),  $\delta$  7.69 (d,  $J=7.8$  Hz, 1H),  $\delta$  7.40 (d,  $J=7.9$  Hz, 1H);  $\delta$  7.19 (t,  $J=7.2$  Hz, 1H);  $\delta$  7.16 (t,  $J=7.4$  Hz, 1H),  $\delta$  6.95 (br. s, 1H),  $\delta$  5.40 (d,  $J=7.6$  Hz, 1H),  $\delta$  4.70 (q,  $J=6.5$  Hz, 1H),  $\delta$  3.42 (d,  $J=5.8$  Hz, 2H),  $\delta$  3.30 (dd,  $J=16.5, 7.6$  Hz, 1H),  $\delta$  3.25 (dd,  $J=14.9, 6.5$  Hz, 1H),  $\delta$  1.46 (s, 9H),  $\delta$  1.44 (s, 9H);  $^{13}\text{C}$  NMR 203.0, 166.2, 155.3, 136.1, 127.3, 123.0, 122.0, 119.4, 118.5, 111.3, 109.6, 82.0, 79.9, 59.9, 48.0, 28.2, 27.8, 26.8; HRESI-MS  $m/z$  425.2038  $[\text{M} + \text{Na}]^+$  [Calc. for  $\text{C}_{22}\text{H}_{30}\text{N}_2\text{O}_5\text{Na}^+$ , 425.2053, 2.7 ppm error].

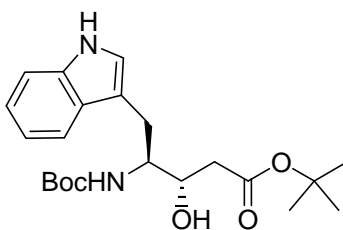

**14a**

**t-Butyl 4(S)-[(tert-butoxycarbonyl)-amino]-3(S)-hydroxy 4-indolepentanoate (14a):** amorphous powder;  $[\alpha]_D^{28} = -5.8$  (c 2,  $\text{CHCl}_3$ ); UV (EtOAc)  $\lambda_{\text{max}}$  (log  $\epsilon$ ) 285 nm (7.75), IR (Film)  $\nu_{\text{max}}$ : 3415, 1713, 1690, 1681, 1251, 1162, 742  $\text{cm}^{-1}$ ;  $^1\text{H}$  NMR ( $\text{CDCl}_3$  at room temperature)  $\delta$  8.23 (br. s, 1H),  $\delta$  7.75 (d,  $J=7.8$  Hz, 1H),  $\delta$  7.34 (d,  $J=8.0$  Hz, 1H);  $\delta$  7.18 (t,  $J=7.2$  Hz, 1H),  $\delta$  7.12 (t,  $J=7.0$  Hz, 1H),  $\delta$  7.05 (s, 1H),  $\delta$  5.10 (d,  $J=9.6$  Hz, 1H),  $\delta$  4.03 (br. d,  $J=10.3$  Hz, 1H),  $\delta$  3.83 (q,  $J=7.9$  Hz, 1H),  $\delta$  3.63 (br. s, 1H),  $\delta$  3.07 (d,  $J=7.7$  Hz, 2H),  $\delta$  2.53 (dd,  $J=16.9, 10.5$  Hz, 1H),  $\delta$  2.25 (dd,  $J=16.9, 2.6$  Hz, 1H),  $\delta$  1.45 (s, 9H),  $\delta$  1.41 (s, 9H);  $^{13}\text{C}$  NMR 173.0, 156.0, 136.2, 127.6, 122.8, 121.8, 119.3, 119.0, 112.1, 111.0, 81.4, 79.2, 67.0, 57.5, 39.6, 28.4, 28.2, 27.9; HRESI-MS  $m/z$  427.2232  $[\text{M} + \text{Na}]^+$  [Calc. for  $\text{C}_{22}\text{H}_{32}\text{N}_2\text{O}_5\text{Na}^+$ , 427.2214, 5.2 ppm error].

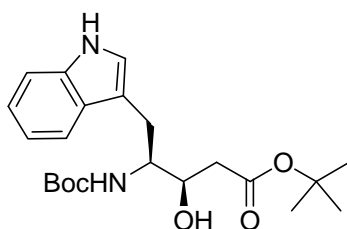

**14b**

***t*-Butyl 4(*S*)-[(*tert*-butoxycarbonyl)-amino]-3(*R*)-hydroxy 4-indolepentanoate (14b):** amorphous powder;  $[\alpha]_D^{28} = +3.1$  (c 2, CHCl<sub>3</sub>); UV (MeOH)  $\lambda_{\max}$  (log  $\epsilon$ ) 224 nm (7.39), 285 nm (6.58); IR (Film)  $\nu_{\max}$ : 3361, 1706, 1690, 1157 cm<sup>-1</sup>; <sup>1</sup>H NMR (CDCl<sub>3</sub> at room temperature)  $\delta$  8.23 (br. s, 1H),  $\delta$  7.65 (d,  $J=7.8$  Hz, 1H),  $\delta$  7.36 (d,  $J=7.9$  Hz, 1H),  $\delta$  7.16 (dt,  $J=7.0, 1.2$  Hz, 1H), 7.13 (dt,  $J=7.3, 1.2$  Hz, 1H)  $\delta$  7.08 (br. s, 1H),  $\delta$  4.66 (d,  $J=5.8$  Hz, 1H),  $\delta$  3.94 (m, 2H),  $\delta$  3.77 (br. s, 1H),  $\delta$  3.08 (br. s, 1H),  $\delta$  2.53 (dd,  $J=16.9, 1.0$  Hz, 1H),  $\delta$  2.46 (dd,  $J=16.6, 8.0$  Hz, 1H),  $\delta$  1.45 (s, 9H),  $\delta$  1.36 (s, 9H); <sup>13</sup>C NMR 172.5, 155.9, 136.1, 127.9, 122.9, 121.8, 119.3, 118.8, 111.2, 111.1, 81.4, 79.4, 69.9, 54.5, 39.1, 28.3, 28.0, 25.4; HRESI-MS  $m/z$  427.2206 [M + Na]<sup>+</sup> [Calculated for C<sub>22</sub>H<sub>32</sub>N<sub>2</sub>O<sub>5</sub>Na<sup>+</sup>, 427.2210, -0.8 ppm error].

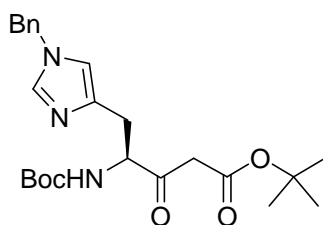

**4i**

***t*-Butyl 4(*S*)-[(*tert*-butoxycarbonyl)-amino]-4-(*N*-benzyl-imidazole)-3-oxopentanoate (4i):** amorphous powder;  $[\alpha]_D^{25} = +0.45$  (c 10, CHCl<sub>3</sub>); UV (*i*-PrOH)  $\lambda_{\max}$  (log  $\epsilon$ ) 210 nm (8.48); IR (Film)  $\nu_{\max}$ : 3332, 1740, 1721, 1707, 1164 cm<sup>-1</sup>; <sup>1</sup>H NMR (CDCl<sub>3</sub> at room temperature)  $\delta$  7.33-7.20 (m, 6H),  $\delta$  6.64 (br.s, 1H),  $\delta$  6.13 (d,  $J=7.2$  Hz, 1H),  $\delta$  4.97 (br. s, 2H),  $\delta$  4.44 (q,  $J=5.4$  Hz, 1H),  $\delta$  3.39 (br. s, 2H),  $\delta$  3.02 (dd,  $J=15.0, 5.7$  Hz, 1H),  $\delta$  2.93 (dd,  $J=14.9, 5.0$  Hz, 1H),  $\delta$  1.38 (s, 9H),  $\delta$  1.36 (s, 9H); <sup>13</sup>C NMR 203.1, 166.3, 155.5, 137.4, 136.8, 135.7, 128.8, 128.1, 127.1, 81.6, 79.6, 63.9, 59.7, 35.4, 28.8, 28.0; HRESI-MS  $m/z$  444.2506 [M + H]<sup>+</sup> [Calc. for C<sub>24</sub>H<sub>33</sub>N<sub>3</sub>O<sub>5</sub><sup>+</sup>, 444.2499, -2.9 ppm error].

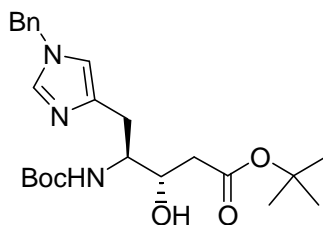

**15a**

***t*-Butyl 4(*S*)-[(*tert*-butoxycarbonyl)-amino]-4-(*N*-benzyl-imidazole)-3(*S*)-hydroxypentanoate (15a):**  $[\alpha]_D^{27} = +11.9$  (c 1, CHCl<sub>3</sub>); UV (MeOH)  $\lambda_{\max}$  (log  $\epsilon$ ) 205 nm (7.70), 209 nm (7.57); IR (Film)  $\nu_{\max}$ : 3335, 1717, 1699, 1260, 1161 cm<sup>-1</sup>; <sup>1</sup>H NMR (CHCl<sub>3</sub> at room temperature)  $\delta$  7.68 (s, 1H),  $\delta$  7.40-7.22 (m, 5H),  $\delta$  6.73 (br.s, 1H),  $\delta$  5.33 (d,  $J=7.0$  Hz, 1H),  $\delta$  5.19 (d,  $J=9.3$  Hz, 1H),  $\delta$  5.14 (br. s, 2H),  $\delta$  4.19 (dd,  $J=7.4, 5.6$  Hz, 1H),  $\delta$  3.74 (m, 1H),  $\delta$  3.10 (dd,  $J=14.5, 8.2$  Hz, 1H),  $\delta$  2.91 (dd,  $J=14.6, 4.7$  Hz, 1H),  $\delta$  2.58 (dd,  $J=15.9, 8.2$  Hz, 1H),  $\delta$  2.38 (dd,  $J=15.8, 5.0$  Hz, 1H),  $\delta$  1.45 (s, 9H),  $\delta$  1.40 (s, 9H); <sup>13</sup>C NMR 171.6, 155.9, 135.8, 129.0, 128.4, 127.3, 80.8, 78.9, 69.3, 53.2, 50.9, 40.3, 31.6, 29.7, 28.3, 28.1; HRESI-MS  $m/z$  446.2649 [M + H]<sup>+</sup> [Calc. for C<sub>24</sub>H<sub>36</sub>N<sub>3</sub>O<sub>5</sub><sup>+</sup>, 446.2656, 0.1 ppm error].

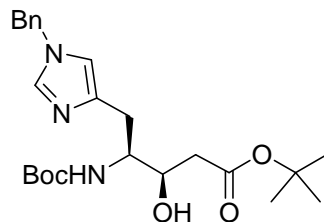

**15b**

***t*-Butyl 4(*S*)-[(*tert*-butoxycarbonyl)-amino]-4-(*N*-benzyl-imidazole)-3(*R*)-hydroxypentanoate (15b):** amorphous powder;  $[\alpha]_D^{26} = +45.6$  (c 1, CHCl<sub>3</sub>); UV (*i*-PrOH)  $\lambda_{\max}$  (log  $\epsilon$ ) 205 nm (8.09), 286 nm (6.87); IR (film)  $\nu_{\max}$ : 3300, 1683, 1161 cm<sup>-1</sup>; <sup>1</sup>H NMR (CHCl<sub>3</sub> at room temperature)  $\delta$  7.48 (s, 1H),  $\delta$  7.33-7.14 (m, 5H),  $\delta$  6.73 (br.s, 1H),  $\delta$  5.34 (d,  $J = 5.9$  Hz, 1H),  $\delta$  5.06 (br. s, 2H),  $\delta$  3.48 (m, 2H),  $\delta$  2.97 (dd,  $J = 15.0, 2.4$  Hz, 1H),  $\delta$  2.84 (dd,  $J = 14.5, 1.6$  Hz, 1H),  $\delta$  2.51 (m, 2H),  $\delta$  1.45 (s, 9H),  $\delta$  1.40 (s, 9H); <sup>1</sup>H NMR (CD<sub>3</sub>OD at room temperature)  $\delta$  7.68 (s, 1H),  $\delta$  7.33 (m, 5H),  $\delta$  6.73 (br.s, 1H),  $\delta$  5.05 (br. s, 2H),  $\delta$  3.79 (m, 1H),  $\delta$  3.58 (m, 1H),  $\delta$  3.84 (dd,  $J = 14.9, 3.5$  Hz, 1H),  $\delta$  2.97 (dd,  $J = 14.9, 2.4$  Hz, 1H),  $\delta$  2.84 (dd,  $J = 14.9$  Hz, 1H),  $\delta$  1.46 (s, 9H),  $\delta$  1.40 (s, 9H); <sup>13</sup>C NMR: 172.1, 155.7, 138.4, 136.6, 135.9, 129.0, 128.3, 127.3, 117.6, 80.8, 79.1, 69.9, 53.3, 50.9, 40.2, 29.7, 28.3, 28.1; HRESI-MS  $m/z$  446.2653 [M + H]<sup>+</sup> [Calc. for C<sub>24</sub>H<sub>36</sub>N<sub>3</sub>O<sub>5</sub><sup>+</sup>, 446.2656, -0.8 ppm error].

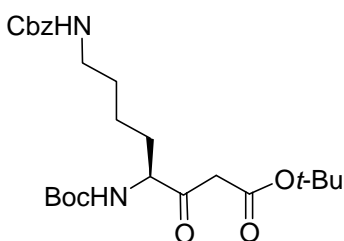

**4j**

***t*-Butyl 4(*S*),8-di[(*tert*-butoxycarbonyl)-amino]-3-oxooctanoate (4j):** amorphous powder;  $[\alpha]_D^{27} = +1.5$  (c 1, CHCl<sub>3</sub>); UV (*i*-PrOH)  $\lambda_{\max}$  (log  $\epsilon$ ) 210 nm (6.48), 235 nm (7.22); IR (Film)  $\nu_{\max}$ : 3339, 1707, 1249, 1163 cm<sup>-1</sup>; <sup>1</sup>H NMR (CDCl<sub>3</sub> at room temperature)  $\delta$  7.32 (m, 5H),  $\delta$  5.37 (d,  $J = 7.6$  Hz, 1H),  $\delta$  5.18 (m, 1H),  $\delta$  5.01 (br. s, 2H),  $\delta$  4.23 (m, 1H),  $\delta$  3.42 (d,  $J = 15.9$  Hz, 1H),  $\delta$  3.34 (d,  $J = 15.7$  Hz, 1H),  $\delta$  3.09 (m, 2H),  $\delta$  1.76 (m, 6H),  $\delta$  1.40 (br. s, 9H),  $\delta$  1.36 (br. s, 9H); <sup>13</sup>C NMR: 202.7, 166.1, 156.5, 136.5, 128.4, 128.0, 82.2, 78.0, 66.5, 59.3, 40.3, 30.4, 29.3, 28.2, 27.8, 22.1; HRESI-MS  $m/z$  479.2748 [M + H]<sup>+</sup> [Calc. for C<sub>25</sub>H<sub>39</sub>N<sub>2</sub>O<sub>7</sub><sup>+</sup>, 479.2758, 0.9 ppm error].

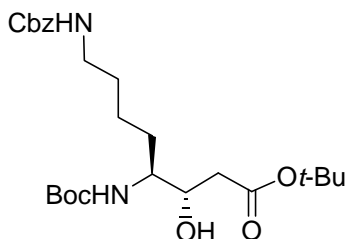

**16a**

***t*-Butyl 4(*S*),8-di[(*tert*-butoxycarbonyl)-amino]-3(*S*)-hydroxyoctanoate (16a):** amorphous powder,  $[\alpha]_D^{29} = -27.9$  (c 1, CHCl<sub>3</sub>); UV (*i*-PrOH)  $\lambda_{\max}$  (log  $\epsilon$ ) 209 nm (6.64), 214 nm (6.61), 233 nm (6.58); IR (film)  $\nu_{\max}$ : 3338, 1705, 1694, 1250, 1155 cm<sup>-1</sup>; <sup>1</sup>H NMR (CDCl<sub>3</sub> at room temperature)  $\delta$  7.33 (m, 5H),  $\delta$  5.09 (s, 2H),  $\delta$  4.83 (m, 2H),  $\delta$  3.98 (m, 1H),  $\delta$  3.48 (m, 2H),  $\delta$  3.18 (m, 2H),  $\delta$  2.48 (d,  $J=16.7, 9.8$  Hz, 1H),  $\delta$  2.36 (d,  $J=16.7, 3.2$  Hz, 1H),  $\delta$  1.59 (m, 6H),  $\delta$  1.45 (s, 9H),  $\delta$  1.40 (s, 9H); <sup>13</sup>C NMR 172.8, 156.5, 156.1, 136.6, 128.4, 128.1, 127.9, 81.4, 79.2, 70.9, 69.0, 66.5, 53.6, 40.6, 39.6, 32.2, 29.5, 28.3, 28.0, 22.9; HR-APCI-MS  $m/z$  481.2912 [M + H]<sup>+</sup> [Calc. for C<sub>25</sub>H<sub>41</sub>N<sub>2</sub>O<sub>7</sub><sup>+</sup>, 481.2915, -0.6 ppm error].

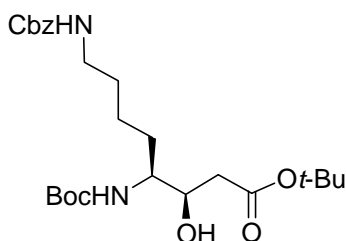

**16b**

***t*-Butyl 4(*S*),8-di[(*tert*-butoxycarbonyl)-amino]-3(*R*)-hydroxyoctanoate (16b):** amorphous powder;  $[\alpha]_D^{27} = -6.3$  (c 1, CHCl<sub>3</sub>); UV (*i*-PrOH)  $\lambda_{\max}$  (log  $\epsilon$ ) 206 nm (7.12), 233 nm (7.05); IR (Film)  $\nu_{\max}$ : 3337, 1695, 1256, 1153 cm<sup>-1</sup>; <sup>1</sup>H NMR (CDCl<sub>3</sub> at room temperature)  $\delta$  7.34 (m, 5H),  $\delta$  5.09 (s, 2H),  $\delta$  4.85 (m, 1H),  $\delta$  4.73 (d,  $J=8.8$  Hz, 1H),  $\delta$  3.95 (m, 1H),  $\delta$  3.57 (m, 1H),  $\delta$  3.46 (d,  $J=3.1$  Hz, 1H),  $\delta$  3.20 (q,  $J=6.3$  Hz, 1H),  $\delta$  2.42 (m, 2H),  $\delta$  1.60 (m, 6H),  $\delta$  1.45 (s, 9H),  $\delta$  1.40 (s, 9H); <sup>13</sup>C NMR 172.3, 156.5, 156.1, 136.6, 128.5, 128.1, 128.0, 81.5, 79.5, 70.9, 66.6, 54.0, 40.7, 39.0, 29.6, 29.1, 28.4, 28.1, 22.8; HR-APCI-MS  $m/z$  481.2908 [M + H]<sup>+</sup> [Calc. for C<sub>25</sub>H<sub>41</sub>N<sub>2</sub>O<sub>7</sub><sup>+</sup>, 481.2915, 0.1 ppm error].

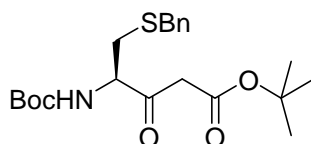

**4k**

***t*-Butyl 4(*R*)-[(*tert*-butoxycarbonyl)-amino]-3-oxo-5-(benzylthio)-pentanoate (4k):** amorphous powder;  $[\alpha]_D^{25} = +0.35$  (c 3.4, CHCl<sub>3</sub>); UV (*i*-PrOH)  $\lambda_{\max}$  (log  $\epsilon$ ) 207 nm (7.71); IR (film)  $\nu_{\max}$ : 2975, 1740, 1712, 1706, 1695, 1158 cm<sup>-1</sup>; <sup>1</sup>H NMR (CDCl<sub>3</sub> at room temperature)  $\delta$  7.31 (m, 5H),  $\delta$  5.31 (d,  $J=6.3$  Hz, 1H),  $\delta$  4.48 (m, 1H),  $\delta$  3.73 (br. s, 2H),  $\delta$  3.48 (d,  $J=15.8$  Hz, 1H),  $\delta$  3.38 (d,  $J=15.9$  Hz, 1H),  $\delta$  2.88 (dd,  $J=13.7, 4.3$  Hz, 1H),  $\delta$  2.74 (dd,  $J=13.2, 6.4$  Hz, 1H),  $\delta$  1.45 (s, 18H); <sup>13</sup>C NMR 201.4, 166.0, 155.2, 137.6, 129.0, 128.6, 127.3, 82.3, 80.3, 58.6, 47.7, 36.7, 32.2, 28.3, 27.9; HRESI-MS  $m/z$  432.1816 [M+Na]<sup>+</sup> [Calc. for C<sub>21</sub>H<sub>31</sub>NO<sub>5</sub>SNa<sup>+</sup>, 432.1821, -0.3 ppm error].

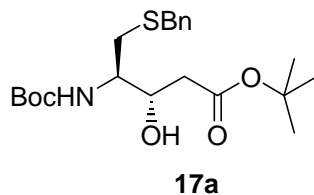

***t*-Butyl 4(*R*)-[(*tert*-butoxycarbonyl)-amino]-3(*S*)-hydroxy-5-(benzylthia)-pentanoate (17a):** amorphous powder;  $[\alpha]_D^{26} = +4.5$  (c 1, CHCl<sub>3</sub>); UV (*i*-PrOH)  $\lambda_{\max}$  (log  $\epsilon$ ) 205 nm (6.95), 238 nm (6.34); IR (film)  $\nu_{\max}$ : 3440, 1706, 1156 cm<sup>-1</sup>; <sup>1</sup>H NMR (CDCl<sub>3</sub> at room temperature)  $\delta$  7.23 (m, 5H),  $\delta$  4.89 (d,  $J = 8.4$  Hz, 1H),  $\delta$  4.21 (d,  $J = 9.9$  Hz, 1H),  $\delta$  3.69 (br. s, 2H),  $\delta$  3.55 (s, 1H),  $\delta$  3.42 (br. s, 1H),  $\delta$  2.52 (m, 2H),  $\delta$  2.47 (dd,  $J = 16.6, 10.2$  Hz, 1H),  $\delta$  2.26 (dd,  $J = 16.6, 1.0$  Hz, 1H),  $\delta$  1.24 (br. s, 18H); <sup>13</sup>C NMR 172.7, 155.7, 138.2, 129.1, 128.4, 126.9, 81.6, 79.5, 67.0, 53.1, 39.5, 36.1, 33.2, 28.3, 28.0; HR-ESI-TOF  $m/z$  412.2152 [M + H]<sup>+</sup> [Calc. for C<sub>21</sub>H<sub>34</sub>NO<sub>5</sub>S<sup>+</sup>, 412.2152, 4.1 ppm error].

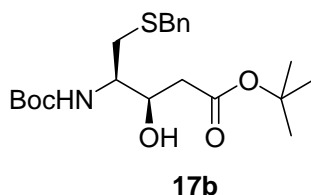

***t*-Butyl 4(*R*)-[(*tert*-butoxycarbonyl)-amino]-3(*R*)-hydroxy-5-(benzylthia)-pentanoate (17b):** amorphous powder;  $[\alpha]_D^{26} = -3.7$  (c 1, CHCl<sub>3</sub>); UV (*i*-PrOH)  $\lambda_{\max}$  (log  $\epsilon$ ) 222 nm (6.96), 283 nm (6.09); IR (Film)  $\nu_{\max}$ : 3372, 1704, 1689, 1156 cm<sup>-1</sup>; <sup>1</sup>H NMR (CDCl<sub>3</sub> at room temperature)  $\delta$  7.89 (m, 5H),  $\delta$  4.86 (d,  $J = 7.6$  Hz, 1H),  $\delta$  3.96 (m, 1H),  $\delta$  3.75 (s, 2H),  $\delta$  3.74 (s, 1H),  $\delta$  3.52 (br. s, 1H),  $\delta$  2.69 (m, 2H),  $\delta$  2.47 (dd,  $J = 16.6, 3.0$  Hz, 1H),  $\delta$  2.35 (dd,  $J = 16.6, 9.0$  Hz, 1H),  $\delta$  1.45 (s, 9H),  $\delta$  1.42 (s, 9H); <sup>13</sup>C NMR 172.3, 155.6, 138.1, 128.9, 125.5, 127.1, 81.6, 79.7, 69.8, 53.2, 39.0, 36.6, 32.1, 28.3, 28.0; HR-APCI-TOF  $m/z$  412.2157 [M + H]<sup>+</sup> [Calc. for C<sub>21</sub>H<sub>34</sub>NO<sub>5</sub>S<sup>+</sup>, 412.2152, -1.2 ppm error].

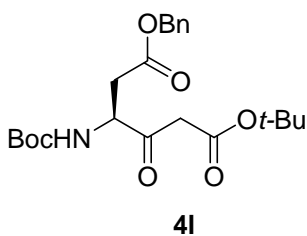

***t*-Butyl 4(*S*)-[(*tert*-butoxycarbonyl)-amino]-3-oxo-6-benzyl-hexandioate (4l):**  $[\alpha]_D^{27} = -4.3$  (c 1, CHCl<sub>3</sub>); UV (*i*-PrOH)  $\lambda_{\max}$  (log  $\epsilon$ ) 207 nm (6.79), 212 nm (6.67), 258 nm (5.92); IR (Film)  $\nu_{\max}$ : 3365, 1716, 1162 cm<sup>-1</sup>; <sup>1</sup>H NMR (CDCl<sub>3</sub> at room temperature)  $\delta$  7.36 (m, 5H),  $\delta$  5.48 (d,  $J = 8.8$  Hz, 1H),  $\delta$  5.13 (br. s, 2H);  $\delta$  4.58 (m, 1H),  $\delta$  3.52 (s, 2H),  $\delta$  3.02 (dd,  $J = 15.9, 4.1$  Hz, 1H),  $\delta$  2.81 (dd,  $J = 15.9, 3.6$  Hz, 1H),  $\delta$  1.49 (s, 9H),  $\delta$  1.44 (s, 9H); <sup>13</sup>C NMR 201.7, 171.3, 166.1, 155.3, 135.3, 128.6, 128.4, 128.2, 82.2, 80.5, 66.9, 56.0, 47.1, 35.3, 28.3, 27.9; HRESI-MS  $m/z$  444.2013 [M+Na]<sup>+</sup> [Calc. for C<sub>22</sub>H<sub>31</sub>NO<sub>7</sub>Na<sup>+</sup>, 444.1999, -4.8 ppm].

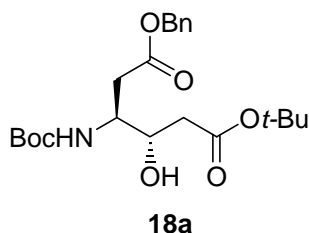

***t*-Butyl 4(*S*)-[(*tert*-butoxycarbonyl)-amino]-3(*S*)-hydroxy-6-benzyl-hexandioate (18a)**: amorphous powder;  $[\alpha]_D^{25} = +27.18$  (c 0.13, CHCl<sub>3</sub>); UV (ethyl acetate)  $\lambda_{\max}$  (log  $\epsilon$ ) 255 nm (5.09); IR (film)  $\nu_{\max}$ : 3388, 1704, 1687, 1260 cm<sup>-1</sup>; <sup>1</sup>H NMR (CDCl<sub>3</sub> at room temperature)  $\delta$  7.35 (m, 5H),  $\delta$  5.1 (m, 2H),  $\delta$  4.09 (m, 1H),  $\delta$  3.97 (m, 1H),  $\delta$  3.66 (br.s, 1H),  $\delta$  2.74 (dd,  $J=15.7, 7.4$  Hz, 1H),  $\delta$  2.65 (dd,  $J=15.8, 6.0$  Hz, 1H),  $\delta$  2.48 (dd,  $J=16.7, 10.0$  Hz, 1H),  $\delta$  2.40 (dd,  $J=16.7, 3.0$  Hz, 1H),  $\delta$  1.45 (s, 9H),  $\delta$  1.42 (s, 9H); HRESI-TOF  $m/z$  424.2330 [M+H]<sup>+</sup> [Calc. for C<sub>22</sub>H<sub>34</sub>NO<sub>7</sub>, 424.2336, 1.5 ppm error].

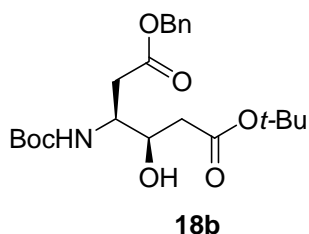

***t*-Butyl 4(*S*)-[(*tert*-butoxycarbonyl)-amino]-3(*R*)-hydroxy-6-benzyl-hexandioate (18b)**:  $[\alpha]_D^{25} = +9.27$  (c 2.2, CHCl<sub>3</sub>); UV (ethyl acetate)  $\lambda_{\max}$  (log  $\epsilon$ ) 255 nm (4.7); IR (Film)  $\nu_{\max}$ : 3370, 1703, 1696, 1685, 1260, 1649 cm<sup>-1</sup>; <sup>1</sup>H NMR (CDCl<sub>3</sub> at room temperature)  $\delta$  7.35 (m, 5H),  $\delta$  5.31 (d,  $J=10.3$  Hz, 1H),  $\delta$  5.13 (s, 2H),  $\delta$  4.01 (m, 1H),  $\delta$  3.90 (m, 1H),  $\delta$  3.60 (br.s, 1H),  $\delta$  2.74 (dd,  $J=15.7, 7.0$  Hz, 1H),  $\delta$  2.64 (dd,  $J=16.1, 4.3$  Hz, 1H),  $\delta$  2.52 (dd,  $J=16.4, 3.0$  Hz, 1H),  $\delta$  2.47 (dd,  $J=17.9, 6.8$  Hz, 1H),  $\delta$  1.45 (s, 9H),  $\delta$  1.41 (s, 9H); <sup>13</sup>C NMR 172.3, 172.0, 155.3, 135.6, 128.6, 128.3, 128.2, 81.6, 79.7, 69.6, 66.5, 51.1, 39.0, 34.5, 28.3, 28.0; HRESI-TOF  $m/z$  424.2323 [M+H]<sup>+</sup> [Calc. for C<sub>22</sub>H<sub>34</sub>NO<sub>7</sub><sup>+</sup>, 424.2336, -3.1 ppm error].

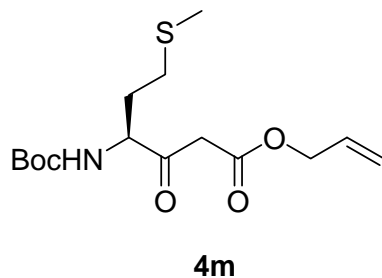

**Allyl 4(*S*)-[(*tert*-butoxycarbonyl)-amino]-3-oxo-6-methylthiahexanoate (4m)**: amorphous powder;  $[\alpha]_D^{25} = -18.1$  (c 10, CHCl<sub>3</sub>); UV (*i*-PrOH)  $\lambda_{\max}$  (log  $\epsilon$ ) 207 nm (8.03); IR (Film)  $\nu_{\max}$ : 3360, 1712, 1648, 1250, 1167 cm<sup>-1</sup>; <sup>1</sup>H NMR (CDCl<sub>3</sub> at room temperature)  $\delta$  5.89 (ddt,  $J=17.2, 10.4, 5.8$  Hz, 1H),  $\delta$  5.29 (dd,  $J=17.2, 1.4$  Hz, 2H),  $\delta$  5.17 (dd,  $J=10.4, 1.3$  Hz, 1H),  $\delta$  5.08 (d,  $J=5.7$  Hz, 1H),  $\delta$  4.60 (m, 2H),  $\delta$  4.39 (m, 1H),  $\delta$  3.46 (s, 2H),  $\delta$  2.50 (t,  $J=7.4$  Hz, 2H),  $\delta$  2.20 (m, 1H),  $\delta$  1.72 (m, 1H),  $\delta$  2.01 (s, 3H),  $\delta$  1.40 (br. s, 9H); <sup>13</sup>C NMR 200.0, 131.4, 118.8, 65.9, 65.9, 60.3, 52.7, 49.9, 32.0, 29.8, 28.2; HRESI-MS  $m/z$  354.1347 [M+Na]<sup>+</sup> [Calc. for C<sub>15</sub>H<sub>25</sub>NO<sub>5</sub>SN<sup>+</sup>, 354.1351, -0.3 ppm error].



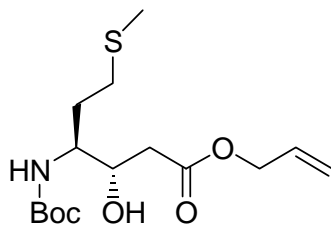

**19a**

**Allyl 4(S)-[(*tert*-butoxycarbonyl)-amino]-3(S)-hydroxy-6-methylthiahexanoate (19a):** amorphous powder;  $[\alpha]_D^{26} = +13.7$  (c 1, CHCl<sub>3</sub>); UV (*i*-PrOH)  $\lambda_{\max}$  (log  $\epsilon$ ) 206 nm (6.97); IR (Film)  $\nu_{\max}$ : 3355, 1712, 1690, 1501, 1162 cm<sup>-1</sup>; <sup>1</sup>H NMR (CDCl<sub>3</sub> at room temperature)  $\delta$  5.98 (ddt,  $J=17.2, 10.4, 5.8$  Hz, 1H),  $\delta$  5.33 (dd,  $J=17.2, 1.4$  Hz, 2H),  $\delta$  5.25 (dd,  $J=10.4, 1.1$  Hz, 1H),  $\delta$  4.82 (d,  $J=9.5$  Hz, 1H), 4.62 (d,  $J=5.4$  Hz, 1H),  $\delta$  4.09 (m, 1H),  $\delta$  3.66 (m, 1H),  $\delta$  3.34 (br s, 1H),  $\delta$  2.54 (m, 4H),  $\delta$  1.60 (s, 3H),  $\delta$  1.88 (m, 2H),  $\delta$  1.45 (br. s, 9H); <sup>13</sup>C NMR 173.0, 156.0, 131.7, 118.8, 79.5, 69.1, 65.5, 53.1, 38.6, 32.3, 30.7, 28.3, 15.5; HRESI-MS  $m/z$  356.1506 [M+Na]<sup>+</sup> [Calc. for C<sub>15</sub>H<sub>27</sub>NO<sub>5</sub>Na<sup>+</sup>, 356.1508, -1.0 ppm error].

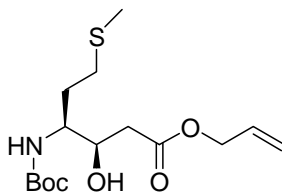

**19b**

**Allyl 4(S)-[(*tert*-butoxycarbonyl)-amino]-3(R)-hydroxy-6-methylthiahexanoate (19b):** amorphous powder;  $[\alpha]_D^{28} = +7.1$  (c 1, CHCl<sub>3</sub>); UV (MeOH)  $\lambda_{\max}$  (log  $\epsilon$ ) nm; IR (Film)  $\nu_{\max}$ : 3355, 1731, 1681, 1648, 1170 cm<sup>-1</sup>; <sup>1</sup>H NMR (CDCl<sub>3</sub> at room temperature)  $\delta$  5.91 (ddt,  $J=17.2, 10.4, 5.8$  Hz, 1H),  $\delta$  5.33 (dd  $J=17.2, 1.4$  Hz, 2H),  $\delta$  5.25 (dd,  $J=10.4, 1.1$  Hz, 1H),  $\delta$  4.76 (d,  $J=8.5$  Hz, 1H),  $\delta$  4.62 (d,  $J=5.9$  Hz, 2H),  $\delta$  4.04 (m, 1H),  $\delta$  3.68 (m, 1H),  $\delta$  3.34 (m, 1H),  $\delta$  2.52 (m, 4H),  $\delta$  2.10 (s, 3H),  $\delta$  1.85 (m, 1H), 1.65 (m, 1H),  $\delta$  1.44 (br. s, 9H); <sup>13</sup>C NMR 172.4, 156.0 (not detected), 131.7, 118.7, 79.8, 70.7, 65.6, 53.8, 38.2, 30.8, 29.5, 28.3, 15.6; HRESI-MS  $m/z$  356.1505 [M+Na]<sup>+</sup> [Calc. for C<sub>15</sub>H<sub>27</sub>NO<sub>5</sub>Na<sup>+</sup>, 356.1509, -0.1 ppm error].

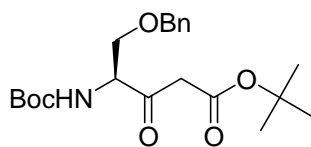

**4n**

***t*-Butyl 4(S)-[(*tert*-butoxycarbonyl)-amino]-3-oxo-5-benzyloxapentanoate (4n):** amorphous powder;  $[\alpha]_D^{27} = +19.8$  (c 5, CHCl<sub>3</sub>); UV (*i*-PrOH)  $\lambda_{\max}$  (log  $\epsilon$ ) 211 nm (6.54), 249 nm (5.61); IR (film)  $\nu_{\max}$ : 3434, 3355, 1745, 1713, 1164 cm<sup>-1</sup>; <sup>1</sup>H NMR  $\delta$  7.31 (m, 5H),  $\delta$  5.47 (d,  $J=7.2$  Hz, 1H),  $\delta$  4.50 (m, 3H),  $\delta$  3.90 (dd,  $J=9.7, 3.6$  Hz, 1H),  $\delta$  3.65 (dd,  $J=9.7, 4.3$  Hz, 1H),  $\delta$  3.52 (d,  $J=15.9$  Hz, 1H),  $\delta$  3.43 (d,  $J=15.9$  Hz, 1H),  $\delta$  1.45 (s, 9H),  $\delta$  1.43 (s, 9H); <sup>13</sup>C NMR 201.1, 166.0, 155.3, 137.3, 128.5, 127.9, 127.7, 82.1, 80.1 73.4, 69.3, 59.7, 47.9, 28.3, 27.9; HRESI-MS  $m/z$  394.22245 [M+H]<sup>+</sup> [Calc. for C<sub>21</sub>H<sub>32</sub>NO<sub>6</sub><sup>+</sup>, 394.2230, -0.1 ppm error].

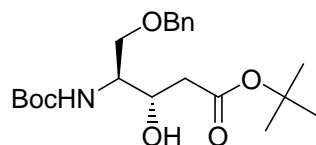

**20a**

***t*-Butyl 4(*S*)-[(*tert*-butoxycarbonyl)-amino]-3(*S*)-hydroxy-5-benzlyoxapentanoate (20a):** amorphous powder;  $[\alpha]_D^{29} = +2.6$  (c 1, CHCl<sub>3</sub>); UV (*i*-PrOH)  $\lambda_{\max}$  (log  $\epsilon$ ) 259 nm (6.15); IR (Film)  $\nu_{\max}$ : 3443, 3382, 1711, 1689, 1156 cm<sup>-1</sup>; <sup>1</sup>H NMR (CDCl<sub>3</sub> at room temperature)  $\delta$  7.23 (m, 5H),  $\delta$  5.08 (d,  $J=9.1$  Hz, 1H),  $\delta$  4.52 (br. s, 2H),  $\delta$  4.26 (br. d,  $J=9.1$  Hz, 1H),  $\delta$  3.55 (m, 1H),  $\delta$  3.63 (d,  $J=4.9$  Hz, 2H),  $\delta$  3.39 (br. s, 1H);  $\delta$  2.49 (dd,  $J=16.3, 8.9$  Hz, 1H),  $\delta$  2.47 (dd,  $J=16.4, 4.0$  Hz, 1H),  $\delta$  1.45 (s, 9H);  $\delta$  1.34 (s, 9H); <sup>13</sup>C NMR 172.0, 155.8, 137.6, 128.4, 127.8, 127.7, 81.2, 79.5, 73.4, 71.1, 68.0, 52.7, 39.5, 28.3, 28.1; HRESI-MS  $m/z$  396.2394 [M+H]<sup>+</sup> [Calc. for C<sub>21</sub>H<sub>34</sub>NO<sub>6</sub><sup>+</sup>, 396.2387, -3.3 ppm error].

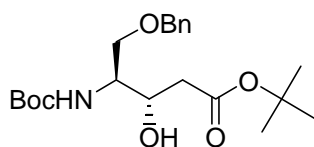

**20b**

***t*-Butyl 4(*S*)-[(*tert*-butoxycarbonyl)-amino]-3(*R*)-hydroxy-5-benzlyoxapentanoate (20b):** amorphous powder;  $[\alpha]_D^{29} = +12.3$  (c 1, CHCl<sub>3</sub>); UV (*i*-PrOH)  $\lambda_{\max}$  (log  $\epsilon$ ) 259 nm (6.04); IR (film)  $\nu_{\max}$ : 3440, 3366, 1705, 1689 cm<sup>-1</sup>; <sup>1</sup>H NMR (CDCl<sub>3</sub> at room temperature)  $\delta$  7.34 (m, 5H),  $\delta$  5.12 (d,  $J=8.5$  Hz, 1H),  $\delta$  4.52 (br. s, 2H),  $\delta$  4.06 (br. s, 1H),  $\delta$  3.81 (dd,  $J=9.4, 3.1$  Hz, 1H),  $\delta$  3.71 (br. m, 1H),  $\delta$  3.58 (dd,  $J=9.4, 3.1$  Hz, 1H);  $\delta$  3.50 (br. s, 1H),  $\delta$  2.53 (dd,  $J=16.3, 3.7$  Hz, 1H),  $\delta$  2.43 (dd,  $J=16.4, 8.5$  Hz, 1H),  $\delta$  1.45 (s, 9H);  $\delta$  1.43 (s, 9H); <sup>13</sup>C NMR 172.1, 155.8, 137.7, 128.4, 127.8, 127.6, 81.2, 79.6, 73.4, 71.1, 67.9, 53.4, 39.5, 28.4, 28.1; HRESI-MS  $m/z$  396.2381 [M+H]<sup>+</sup> [Calc. for C<sub>21</sub>H<sub>34</sub>NO<sub>6</sub>, 396.2387, -0.1 ppm error].

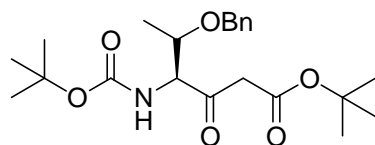

**4o**

***t*-Butyl 4(*S*)-[(*tert*-butoxycarbonyl)-amino]-3-oxo-5(*S*)-benzlyoxahexanoate (4o):** amorphous powder;  $[\alpha]_D^{26} = +11.9$  (c 10, CHCl<sub>3</sub>); UV (*i*-PrOH)  $\lambda_{\max}$  (log  $\epsilon$ ) 205 nm (7.09); IR (Film)  $\nu_{\max}$ : 3441, 1713, 1163 cm<sup>-1</sup>; <sup>1</sup>H NMR (CDCl<sub>3</sub> at room temperature)  $\delta$  7.32 (m, 5H),  $\delta$  5.37 (d,  $J=8.5$  Hz, 1H);  $\delta$  4.49 (d,  $J=11.2$  Hz, 1H),  $\delta$  4.40 (d,  $J=11.2$  Hz, 1H),  $\delta$  4.35 (dd,  $J=8.7, 2.4$  Hz, 1H),  $\delta$  4.14 (dq,  $J=6.26, 2.6, 1$ ),  $\delta$  3.44 (d,  $J=16.9$  Hz, 1H),  $\delta$  3.37 (d,  $J=16.1$  Hz, 1H);  $\delta$  1.44 (s, 9H),  $\delta$  1.25 (s, 9H),  $\delta$  1.20 (d,  $J=6.3$  Hz, 3H); <sup>13</sup>C NMR 202.0, 166.0, 155.7, 137.6, 128.4, 127.8, 127.7, 81.9, 80.0, 74.0, 71.0, 63.4, 48.5, 28.2, 27.9, 15.9; HRESI-MS  $m/z$  430.2199 [M + Na]<sup>+</sup> [Calc. for C<sub>22</sub>H<sub>33</sub>NO<sub>6</sub>Na, 430.2206, 0.3 ppm error].

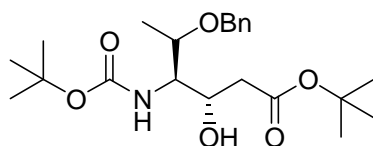

**21a**

***t*-Butyl 4(*S*)-[(*tert*-butoxycarbonyl)-amino]-3(*S*)-hydroxy-5(*S*)-benzlyoxahexanoate (21a):** amorphous powder;  $[\alpha]_D^{28} = -7.5$  (c 1, CHCl<sub>3</sub>); UV (*i*-PrOH)  $\lambda_{\max}$  (log  $\epsilon$ ) 209 nm (7.21); IR (Film)  $\nu_{\max}$ : 3452, 1713, 1501, 1157 cm<sup>-1</sup>; <sup>1</sup>H NMR (CDCl<sub>3</sub> at room temperature)  $\delta$  7.34 (m, 5H),  $\delta$  5.06 (d,  $J = 9.81$  Hz, 1H),  $\delta$  4.65 (d,  $J = 11.3$  Hz, 1H),  $\delta$  4.39 (d,  $J = 11.3$  Hz, 1H),  $\delta$  4.21 (br t,  $J = 6.3$  Hz, 1H),  $\delta$  3.88 (m, 1H),  $\delta$  3.63 (m, 1H),  $\delta$  3.52 (br s, 1H),  $\delta$  2.42 (dd,  $J = 16.3, 8.4$  Hz, 1H),  $\delta$  2.33 (dd,  $J = 16.3, 5.3$  Hz, 1H),  $\delta$  1.45 (s, 9H),  $\delta$  1.43 (s, 9H),  $\delta$  1.26 (d,  $J = 6.3$  Hz, 3H); <sup>13</sup>C NMR 171.4, 156.5, 137.5, 128.6, 128.0, 127.9, 80.9, 79.3, 77.5, 70.4, 70.2, 56.6, 39.8, 28.3, 28.1, 15.9; HRESI-MS  $m/z$  410.2544 [M+H]<sup>+</sup> [Calc. for C<sub>22</sub>H<sub>36</sub>NO<sub>6</sub>, [M+H]<sup>+</sup>, 410.2543, -1.9 ppm error].

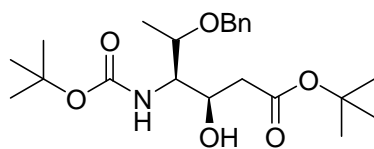

**21b**

***t*-Butyl 4(*S*)-[(*tert*-butoxycarbonyl)-amino]-3(*R*)-hydroxy-5(*S*)-benzlyoxahexanoate (21b):**  $[\alpha]_D^{29} = +18.9$  (c 1, CHCl<sub>3</sub>); UV (*i*-PrOH)  $\lambda_{\max}$  (log  $\epsilon$ ) 205 nm (7.03); IR (film)  $\nu_{\max}$  3444, 1715, 1154 cm<sup>-1</sup>; <sup>1</sup>H NMR (CDCl<sub>3</sub> at room temperature)  $\delta$  7.34 (m, 5H),  $\delta$  4.93 (d,  $J = 9.9$  Hz, 1H),  $\delta$  4.62 (d,  $J = 11.3$  Hz, 1H),  $\delta$  4.43 (d,  $J = 11.3$  Hz, 1H),  $\delta$  4.15 (m, 1H),  $\delta$  3.98 (m, 1H),  $\delta$  3.48 (m, 1H),  $\delta$  3.47 (br. s, 1H),  $\delta$  2.56 (dd,  $J = 16.6, 3.2$  Hz, 1H),  $\delta$  2.38 (dd,  $J = 16.6, 8.7$  Hz, 1H),  $\delta$  1.46 (s, 9H),  $\delta$  1.43 (s, 9H);  $\delta$  1.20 (d,  $J = 6.3$  Hz, 3H); <sup>13</sup>C NMR 172.7, 156.2, 138.2, 128.4, 127.9, 127.8, 81.3, 79.4, 72.1, 71.1, 68.5, 58.1, 39.2, 28.3, 28.1, 16.3; HRESI-MS  $m/z$  410.2552 [M+H]<sup>+</sup> [Calc. for C<sub>22</sub>H<sub>36</sub>NO<sub>6</sub>, [M+H]<sup>+</sup>, 410.2543, -3.4 ppm error].

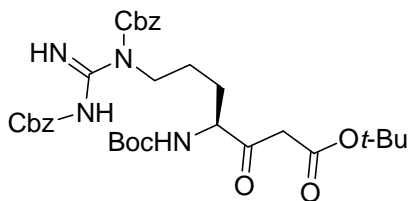

**4p**

***t*-butyl 7-(1,3-bis(benzyloxycarbonyl)guanidino)-4(*S*)-(tert-butoxycarbonylamino)-3-oxoheptanoate (4p):** amorphous powder;  $[\alpha]_D^{26} = +0.36$  (c 9.7, CHCl<sub>3</sub>); UV (*i*-PrOH)  $\lambda_{\max}$  (log  $\epsilon$ ) 210 nm (6.48), 235 nm (7.22); IR (Film)  $\nu_{\max}$ : 3389, 1706, 1613, 1257 cm<sup>-1</sup>; <sup>1</sup>H NMR (CDCl<sub>3</sub> at room temperature)  $\delta$  9.41 (br. s, 1H),  $\delta$  9.27 (br. s, 1H),  $\delta$  7.36 (m, 10H),  $\delta$  5.57 (d,  $J = 7.9$  Hz, 1H),  $\delta$  5.24 (br. s, 2H),  $\delta$  5.15 (br. s, 2H),  $\delta$  4.30 (m, 1H),  $\delta$  3.95 (m, 2H),  $\delta$  3.37 (br. s, 2H),  $\delta$  1.84 (m, 2H),  $\delta$  1.63 (m, 2H),  $\delta$  1.40 (s, 9H),  $\delta$  1.42 (s, 9H); <sup>13</sup>C NMR 202.8, 166.3, 163.6, 160.5, 155.7, 136.6, 134.5, 128.7, 128.3, 127.9, 81.9, 79.8, 68.9, 67.0, 64.1, 59.2, 47.4, 44.1, 28.2, 27.8, 26.9, 24.6; HR-APCI-TOF  $m/z$  641.3184 [M+H]<sup>+</sup> [Calc. for C<sub>33</sub>H<sub>45</sub>N<sub>4</sub>O<sub>9</sub><sup>+</sup>, 641.3187, -0.4 ppm error].

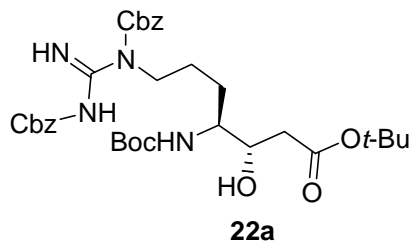

***t*-butyl 7-(1,3-bis(benzyloxycarbonyl)guanidino)-4(*S*)-(tert-butoxycarbonylamino)-3(*S*)-hydroxyheptanoate (22a)**: amorphous powder;  $[\alpha]_D^{26} = -8.2$  (c 1, CHCl<sub>3</sub>); UV (*i*-PrOH)  $\lambda_{\max}$  (log  $\epsilon$ ) 209 nm (6.64), 214 nm (6.61), 233 nm (6.58); IR (Film)  $\nu_{\max}$ : 3386, 1711, 1610, 1255 cm<sup>-1</sup>; <sup>1</sup>H NMR (CDCl<sub>3</sub> at room temperature)  $\delta$  9.44 (br. s, 1H),  $\delta$  9.27 (br. s, 1H),  $\delta$  7.36 (m, 10H),  $\delta$  5.23 (s, 2H),  $\delta$  5.16 (d,  $J=12.6$  Hz, 1H),  $\delta$  5.11 (d,  $J=12.6$  Hz, 1H),  $\delta$  4.93 (d, 9.6 Hz, 1H),  $\delta$  3.95 (m, 3H), 3.47 (d,  $J=3.6$  Hz, 1H),  $\delta$  3.46 (m, 1H),  $\delta$  2.40 (dd,  $J=16.7, 9.5$  Hz, 1H),  $\delta$  2.27 (dd,  $J=16.4, 3.3$  Hz, 1H),  $\delta$  1.61 (m, 4H),  $\delta$  1.45 (s, 9H),  $\delta$  1.40 (s, 9H); <sup>13</sup>C NMR 172.7, 163.8, 160.6, 156.1, 155.9, 136.8, 134.7, 128.8, 128.4, 128.3, 127.8, 127.7, 81.3, 79.1, 69.1, 68.8, 66.9, 53.6, 44.5, 39.6, 29.3, 28.3, 28.0, 25.5; HRESI-MS  $m/z$  375.2610 [M+H-2Cbz]<sup>+</sup> [Calc. for C<sub>17</sub>H<sub>34</sub>N<sub>4</sub>O<sub>5</sub>, 375.2602, -2.2 ppm error].

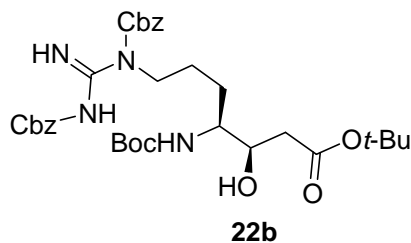

**7-(1,3-bis(benzyloxycarbonyl)guanidino)-4(*S*)-(tert-butoxycarbonylamino)-3(*R*)-hydroxyheptanoate (22b)**: amorphous powder;  $[\alpha]_D^{26} = +1$  (c 1, CHCl<sub>3</sub>); UV (*i*-PrOH)  $\lambda_{\max}$  (log  $\epsilon$ ) 206 nm (7.12), 233 nm (7.05); IR (Film)  $\nu_{\max}$ : 3386, 1724, 1711, 1610, 1257 cm<sup>-1</sup>; <sup>1</sup>H NMR (CDCl<sub>3</sub> at room temperature)  $\delta$  9.44 (br. s, 1H),  $\delta$  9.27 (br. s, 1H),  $\delta$  7.36 (m, 10H),  $\delta$  5.23 (s, 2H), 5.14 (s, 2H),  $\delta$  5.01 (d,  $J=9.1$  Hz, 1H),  $\delta$  3.98 (m, 3H),  $\delta$  3.49 (m, 2H),  $\delta$  2.37 (dd,  $J=16.5, 3.5$  Hz, 1H),  $\delta$  2.27 (dd,  $J=16.4, 8.9$  Hz, 1H), 1.61 (m, 4H), 1.45 (s, 9H), 1.40 (s, 9H); <sup>13</sup>C NMR 172.2, 163.7, 160.6, 156.1, 155.8, 136.8, 134.6, 128.7, 128.3, 128.2, 127.8, 127.7, 81.2, 79.2, 70.7, 68.8, 66.9, 54.3, 44.5, 39.1, 28.3, 28.0, 26.0, 25.3; HRESI-MS  $m/z$  375.2602 [M+H-2Cbz]<sup>+</sup> [Calc. for C<sub>17</sub>H<sub>34</sub>N<sub>4</sub>O<sub>5</sub>, 375.2602, -3.0 ppm error].

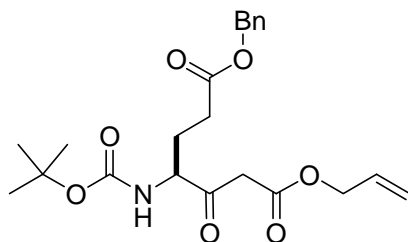

**7-benzyl 1-*t*-butyl 4-(tert-butoxycarbonylamino)-3-oxoheptanedioate (4q)**: amorphous powder;  $[\alpha]_D^{27} = +0.3$  (c 10, CHCl<sub>3</sub>); IR (Film)  $\nu_{\max}$ : 3368, 1729, 1713, 1690, 1501, 1167 cm<sup>-1</sup>; <sup>1</sup>H NMR  $\delta$  7.38 (m, 5H),  $\delta$  5.91 (ddt,  $J=17.2, 10.4, 5.8$  Hz, 1H),  $\delta$  5.32 (dd  $J=17.2, 1.4$  Hz, 2H),  $\delta$  5.25 (dd,  $J=10.4, 1.4$  Hz, 1H),  $\delta$  5.11 (s, 2H),  $\delta$  4.64 (br. m, 3H),  $\delta$  4.40 (m, 1H),  $\delta$  3.60 (m, 2H),  $\delta$  2.20 (br. m, 4H),  $\delta$  1.41 (br. s, 9H); <sup>13</sup>C NMR 201.5, 172.6, 171.9, 155.3, 135.7, 131.4, 128.5, 128.2, 128.2, 118.9, 80.3, 80.0, 66.5, 58.9, 45.9, 30.3, 29.6, 28.2; HRESI-MS  $m/z$  442.1819 [M + Na]<sup>+</sup> [Calc. for C<sub>22</sub>H<sub>29</sub>NO<sub>7</sub>Na<sup>+</sup>, 442.1836, 4.0 ppm error].

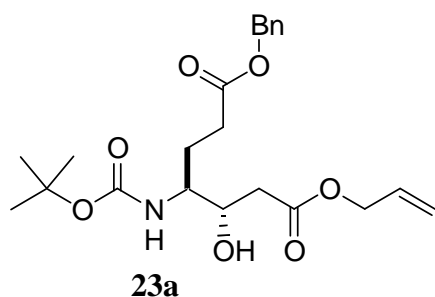

**7-benzyl 1-*t*-butyl 4-(*tert*-butoxycarbonylamino)-3(*S*)-hydroxyheptanedioate (23a):** amorphous powder;  $[\alpha]_D^{25} -9.5$  (0.01, MeOH),  $[\alpha]_D^{26} = -10.8$  (c 1, CHCl<sub>3</sub>); UV (MeOH)  $\lambda_{\max}$  (log  $\epsilon$ ) 210 (3.65) 207 nm (3.69); IR (Film)  $\nu_{\max}$ : 3391, 1734, 1715 cm<sup>-1</sup>; <sup>1</sup>H NMR  $\delta$  7.34 (m, 5H),  $\delta$  5.91 (ddt,  $J=17.2, 10.4, 5.8$  Hz, 1H),  $\delta$  5.32 (dd  $J=17.2, 1.4$  Hz, 2H),  $\delta$  5.25 (dd,  $J=10.4, 1.4$  Hz, 1H),  $\delta$  5.11 (s, 2H),  $\delta$  4.83 (d,  $J=9.9$  Hz, 1H),  $\delta$  4.62 (dm, 2H), 4.06 (d,  $J=9.5$  Hz, 1H),  $\delta$  3.58 (q,  $J=7.8$  Hz, 1H),  $\delta$  2.57 (m, 2H),  $\delta$  2.46 (t,  $J=7.4$  Hz, 2H),  $\delta$  1.93 (m, 2H),  $\delta$  1.41 (br. s, 9H); <sup>13</sup>C NMR 173.3, 172.8, 156.0, 135.9, 131.7, 128.6, 128.3, 118.7, 79.5, 69.1, 66.4, 65.5, 53.3, 38.5, 30.8, 29.7, 28.3; HRESI-MS  $m/z$  422.2179 [M + H]<sup>+</sup> [Calc. for C<sub>22</sub>H<sub>32</sub>NO<sub>7</sub><sup>+</sup>, 422.2180, -1.4 ppm error].

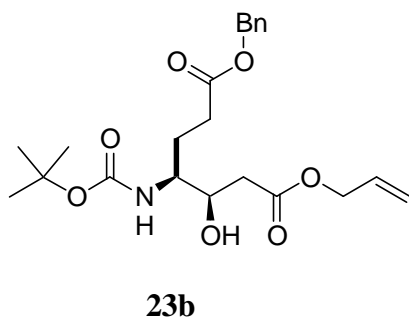

**7-benzyl 1-*t*-butyl 4-(*t*-butoxycarbonylamino)-3(*R*)-heptanedioate (23b):**  $[\alpha]_D^{25} -5.6$  (c 1, MeOH),  $[\alpha]_D^{26} = -2$  (c 1, CHCl<sub>3</sub>); UV (MeOH)  $\lambda_{\max}$  (log  $\epsilon$ ) 255 nm (5.04), 260 nm (4.90); IR (Film)  $\nu_{\max}$ : 3375, 1717, 1689, 1509, 1170 cm<sup>-1</sup>; <sup>1</sup>H NMR (CDCl<sub>3</sub> at room temperature)  $\delta$  7.34 (m, 5H),  $\delta$  5.90 (ddt,  $J=17.2, 10.4, 5.8$  Hz, 1H),  $\delta$  5.32 (dd  $J=17.2, 1.4$  Hz, 2H),  $\delta$  5.25 (dd,  $J=10.4, 1.0$  Hz, 1H),  $\delta$  5.11 (s, 2H),  $\delta$  4.82 (d, 9.5 Hz, 1H),  $\delta$  4.60 (d, 2H), 4.02 (m, 1H),  $\delta$  3.60 (m, 1H),  $\delta$  2.49 (m, 4H),  $\delta$  1.96 (m, 1H),  $\delta$  1.71 (m, 1H),  $\delta$  1.41 (br. s, 9H); <sup>13</sup>C NMR 172.3, 171.4, 154.9, 134.8, 130.7, 127.5, 117.6, 78.6, 75.5, 69.7, 65.5, 64.5, 52.9, 37.1, 29.8, 27.3, 23.7; HRESI-MS  $m/z$  444.2007 [M + Na]<sup>+</sup> [Calc. for C<sub>22</sub>H<sub>31</sub>NO<sub>7</sub>Na<sup>+</sup>, 444.1998, error 2.0 ppm].

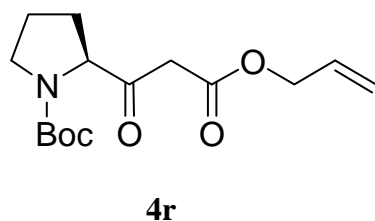

***t*-butyl 2(*S*)-(3-(allyloxy)-3-oxopropanoyl)pyrrolidine-1-carboxylate (4r):** amorphous powder;  $[\alpha]_D^{22} -39.9$  (c 10.3, CHCl<sub>3</sub>); UV (MeOH)  $\lambda_{\max}$  (log  $\epsilon$ ) 246 nm (5.95); IR (Film)  $\nu_{\max}$ : 1750, 1694, 1394, 1164 cm<sup>-1</sup>; <sup>1</sup>H NMR (CDCl<sub>3</sub> at room temperature)  $\delta$  5.91 (ddt  $J=16.2, 11.0, 5.8$  Hz, 1H),  $\delta$  5.34 (d,  $J=17.2$  Hz, 1H),  $\delta$  5.24 (d,

$J=10.2$  Hz, 1H),  $\delta$  4.63 (m, 2H),  $\delta$  4.30 (m, 1H), 3.49 (m, 2H),  $\delta$  2.04 (m, 6H),  $\delta$  1.44 (s, 9H);  $^{13}\text{C}$  NMR 202.5, 166.5, 153.7 131.4, 118.7, 80.7, 65.9, 65.4, 46.6, 45.0, 28.1, 24.3, 23.6; HRESI-MS  $m/z$  320.1472  $[\text{M}+\text{Na}]^+$  [Calc. for  $\text{C}_{15}\text{H}_{23}\text{NO}_5\text{Na}^+$ , 320.1474,  $-1.1$  ppm error].

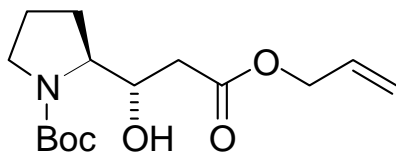

**24a**

***t*-butyl 2(S)-(3-(allyloxy)-1(S)-hydroxy-3-oxopropyl)pyrrolidine-1-carboxylate (24a):** amorphous powder;  $[\alpha]_{\text{D}}^{25} -40.3$  (0.01, MeOH),  $[\alpha]_{\text{D}}^{26} = -25.4$  (c 1,  $\text{CHCl}_3$ ); UV (MeOH)  $\lambda_{\text{max}}$  (log  $\epsilon$ ) 277 (2.35) 207 (3.55) nm; IR (Film)  $\nu_{\text{max}}$ : 3427, 1739, 1690  $\text{cm}^{-1}$ ;  $^1\text{H}$  NMR ( $\text{CDCl}_3$  at room temperature)  $\delta$  5.91 (ddd  $J=16.2$ , 11.0, 5.8 Hz, 1H),  $\delta$  5.33 (d,  $J=17.2$  Hz, 1H),  $\delta$  5.24 (d,  $J=10.2$  Hz, 1H),  $\delta$  4.63 (m, 2H),  $\delta$  4.39 (d, 5.1 Hz, 1H),  $\delta$  4.36 (d, 5.1 Hz, 1H),  $\delta$  4.28 (d,  $J=5.4$  Hz, 1H),  $\delta$  4.25 (d,  $J=5.7$  Hz, 1H),  $\delta$  3.48 (m, 3H),  $\delta$  2.10 (m, 2H),  $\delta$  1.87 (dt,  $J=12.6$ , 12.3, 6.2 Hz, 1H),  $\delta$  1.43 (s, 9H);  $^{13}\text{C}$  NMR 172.1, 156.3, 132.0, 118.3, 80.1, 70.3, 65.3, 62.2, 47.8, 45.0, 37.8 28.4, 27.6, 24.0; HRESI-TOF  $m/z$  300.1802  $[\text{M}+\text{H}]^+$  [Calc. for  $\text{C}_{15}\text{H}_{26}\text{NO}_5$ , 300.1812, 1.3 ppm error].

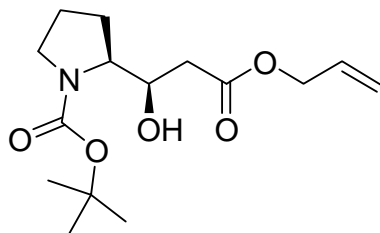

**24b**

***t*-butyl 2(S)-(3-(allyloxy)-1(R)-hydroxy-3-oxopropyl)pyrrolidine-1-carboxylate (24b):**  $[\alpha]_{\text{D}}^{24} -54.8$  (0.01, MeOH); UV (MeOH)  $\lambda_{\text{max}}$  (log  $\epsilon$ ) 278 (2.41) 217 (3.14) 207 (3.10) nm; IR (Film)  $\nu_{\text{max}}$ : 3439, 1724, 1690, 1394, 1166  $\text{cm}^{-1}$ ;  $^1\text{H}$  NMR ( $\text{CDCl}_3$  at room temperature)  $\delta$  5.93 (dd,  $J=10.9$ , 5.7 Hz, 1H),  $\delta$  5.34 (d,  $J=17.2$  Hz, 1H),  $\delta$  5.24 (d,  $J=10.4$ , 1.0 Hz, 1H),  $\delta$  5.00 (s, 1H),  $\delta$  4.63 (d, 5.5 Hz, 2H),  $\delta$  4.10 (br. m, 1H),  $\delta$  3.93 (m, 1H),  $\delta$  3.52 (m, 1H),  $\delta$  3.30 (m, 1H),  $\delta$  2.56 (dd, 15.2, 2.9 Hz, 1H),  $\delta$  2.46 (dd, 15.1, 8.6 Hz, 1H),  $\delta$  1.88 (br. m, 4H),  $\delta$  1.47 (s, 9H);  $^{13}\text{C}$  NMR 171.5, 157.5, 132.0, 118.2, 80.39, 72.5, 65.3, 61.9, 47.3, 40.1, 28.3, 24.1; HRESI-TOF  $m/z$  322.1613  $[\text{M}+\text{Na}]^+$  [Calc. for  $\text{C}_{15}\text{H}_{25}\text{NO}_5\text{Na}^+$ , 322.1631,  $-1.7$  ppm error].

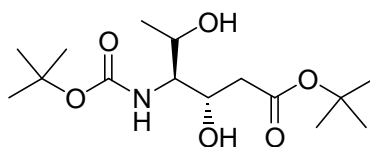

**21c**

***t*-Butyl 4(S)-[(*tert*-butoxycarbonyl)-amino]-3S,5S-dihydroxypentanoate (21c):** amorphous powder;  $[\alpha]_{\text{D}}^{26} = +5.3$  (c 1,  $\text{CHCl}_3$ ); IR (Film)  $\nu_{\text{max}}$ : 3441, 1705, 1690, 1259, 1165  $\text{cm}^{-1}$ ;  $^1\text{H}$  NMR ( $\text{CDCl}_3$  at room temperature)  $\delta$  5.42 (d,  $J=10.0$  Hz, 1H),  $\delta$  4.31 (d, 10.0 Hz, 1H),  $\delta$  4.01 (s, 1H),  $\delta$  3.43 (d, 10.0 Hz, 1H),  $\delta$  2.53 (dd, 17.0, 9.8 Hz, 1H),  $\delta$  2.43 (dd, 17.1, 3.3 Hz, 1H),  $\delta$  1.47 (s, 9H),  $\delta$  1.46 (s, 9H),  $\delta$  1.18 (d, 6.3 Hz, 3H);  $^{13}\text{C}$  NMR 173.1,

151.9, 81.9, 79.5, 72.1, 70.7, 56.4, 38.9, 28.3, 28.1, 19.9; HRESI-MS  $m/z$  342.1892  $[M + Na]^+$  [Calc. for  $C_{15}H_{29}NO_6Na^+$ , 342.18871, -1.5 ppm error].

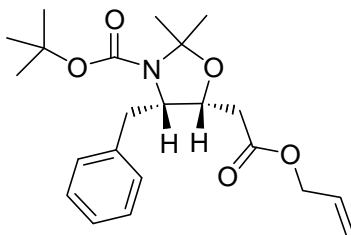

**12c**

**Compound 12c:**  $[\alpha]_D^{27} = -21.5$  (c 1,  $CHCl_3$ ); UV (*i*-PrOH)  $\lambda_{max}$  (log  $\epsilon$ ) 211 nm (7.26); IR (Film)  $\nu_{max}$ : 1720, 1700, 1257  $cm^{-1}$ ;  $^1H$  NMR (mixture of conformers)  $J_{H3,H4} = 4.5$  Hz;  $\delta$  7.23 (m, 5H),  $\delta$  5.79 (m, 1H),  $\delta$  5.25 (ddd,  $J = 17.2, 2.9, 1.5$  Hz, 1H),  $\delta$  5.21 (dm,  $J = 10.3$  Hz, 1H),  $\delta$  4.39 (m, 2H),  $\delta$  4.34 (m, 1H),  $\delta$  4.28 (dd,  $J = 13.2, 5.8$  Hz, 0.6 H),  $\delta$  4.49 (dt,  $J = 11.8, 6.1$  Hz, 1H),  $\delta$  3.01 (d,  $J = 3.3$  Hz),  $\delta$  2.90 (dd,  $J = 13.8, 4.7$  Hz, 0.7 H),  $\delta$  2.78 (dd, 14.1, 9.0 Hz, 1H),  $\delta$  2.68 (m, 1H),  $\delta$  2.48 (m, 1H),  $\delta$  1.67 (s, 3H),  $\delta$  1.57 (s, 9H),  $\delta$  1.47 (s, 3H),  $\delta$  1.25 (s, 9H);  $^{13}C$  NMR 169.9, 151.5, 138.3, 131.9, 129.3, 128.5, 128.3, 126.2, 118.4, 79.8, 72.9, 75.0, 65.3, 60.1, 59.8, 36.5, 35.8, 34.7, 34.5, 29.7, 28.8, 27.9, 27.3, 23.6, 22.7; HRESI-MS  $m/z$  412.2103  $[M + Na]^+$  [Calc. for  $C_{22}H_{31}NO_5Na^+$ , 412.2100, -2.1 ppm error].

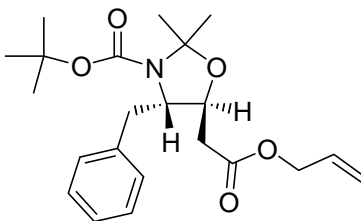

**12d**

**Compound 12d:**  $[\alpha]_D^{27} = -2.8$  (c 7.6,  $CHCl_3$ ); UV (*i*-PrOH)  $\lambda_{max}$  (log  $\epsilon$ ) 208 nm (6.90); IR (Film)  $\nu_{max}$ : 1740, 1701, 1257, 1172  $cm^{-1}$ ;  $^1H$  NMR (mixture of conformers)  $J_{H3,H4} = 2.9$  Hz;  $^{13}C$  NMR 169.9, 137.6, 131.9, 129.7, 129.3, 128.7, 128.5, 126.7, 118.2, 80.3, 75.8, 75.0, 68.1, 65.2, 63.3, 40.6, 40.1, 37.8, 29.7, 28.7, 28.5, 27.7, 27.2; HRESI-MS  $m/z$  412.2082  $[M + Na]^+$  [Calc. for  $C_{22}H_{31}NO_5Na^+$ , 412.2100, 3.09 ppm error].

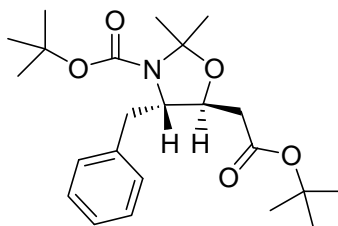

**11c**

**Compound 11c:**  $[\alpha]_D^{26} = +6.9$  (c 5,  $CHCl_3$ ); UV (*i*-PrOH)  $\lambda_{max}$  (log  $\epsilon$ ) 212 nm (6.34); IR (Film)  $\nu_{max}$ : 1733, 1704, 1256, 1170  $cm^{-1}$ ;  $^1H$  NMR ( $CDCl_3$  at room temperature): (mixture of conformers)  $J_{H3,H4} = 2.9$  Hz;  $\delta$  7.26 (m, 5H),  $\delta$  4.34 (m, 1H),  $\delta$  3.87 (m, 1H),  $\delta$  3.18 (m, 1H),  $\delta$  2.83 (m, 1H),  $\delta$  2.38 (dd,  $J = 14.8, 7.8$  Hz, 1H),  $\delta$  2.19 (m, 1H),  $\delta$  1.52 (s, 9H),  $\delta$  1.35 (s, 9H);  $^{13}C$  NMR 169.5, 155.7, 137.6, 137.5, 129.8, 129.4, 128.7, 128.4, 126.6,

126.5, 80.8, 76.1, 75.1, 63.2, 41.8, 41.3, 39.8, 37.6, 29.7, 28.5, 27.9, 27.2; HRESI-MS  $m/z$  428.241  $[M + Na]^+$  [Calc. for  $C_{23}H_{35}NO_5Na^+$ , 428.2413, -0.4 ppm error].

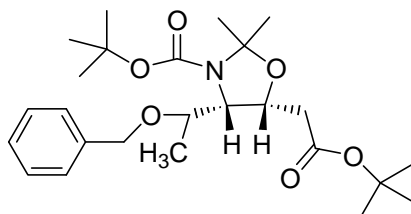

**21d**

**Compound 21d:**  $[\alpha]_D^{27} = -40.6$  (c 0.5,  $CHCl_3$ ); UV (ethyl acetate)  $\lambda_{max}$  (log  $\epsilon$ ) 257 nm (5.49); IR (Film)  $\nu_{max}$ : 1732, 1695  $cm^{-1}$ ;  $^1H$  NMR ( $CDCl_3$  at room temperature): (mixture of conformers)  $J_{H3,H4} = 4.7$  Hz;  $\delta$  7.31 (m, 5H),  $\delta$  4.61 (d,  $J = 12.1$  Hz, 1H),  $\delta$  4.53 (br s, 1H),  $\delta$  4.49 (m, 1H), 2.66 (m, 1H), 2.62 (m, 1H), 1.56 (s, 3H), 1.48 (s, 3H), 1.46 (s, 9H)  $^{13}C$  NMR 169.9, 129.3, 127.3, 80.7, 63.4, 42.1, 39.8, 29.7, 28.4, 28.2, 14.0; HRESI-MS  $m/z$  450.2856  $[M+H]^+$  [Calc. for  $C_{22}H_{34}NO_7$ , 450.2856, -1.2 ppm error].

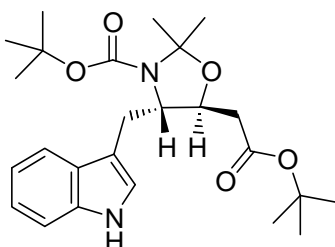

**22c**

**Compound 22c:**  $[\alpha]_D^{27} = -20.2$  (c 1,  $CHCl_3$ ); IR (Film)  $\nu_{max}$ : 3348, 1723, 1689, 1258, 1158  $cm^{-1}$ ;  $^1H$  NMR ( $CDCl_3$  at room temperature): (mixture of conformers)  $J_{H3,H4} = 2.7$  Hz;  $\delta$  8.09 (s, 1H),  $\delta$  7.79 (m, 0.5H),  $\delta$  7.68 (m, 0.5H),  $\delta$  7.34 (m, 1H),  $\delta$  7.18 (m, 1H),  $\delta$  7.10 (t,  $J = 7.3$  Hz, 1H),  $\delta$  7.05 (s, 1H),  $\delta$  4.39 (br. s, 1H),  $\delta$  4.04 (dt,  $J = 9.8, 2.8$  Hz, 1H),  $\delta$  3.36 (t,  $J = 14.4$  Hz, 1H),  $\delta$  2.99 (m, 0.5H),  $\delta$  2.90 (m, 0.5H),  $\delta$  2.38 (dd,  $J = 14.6, 7.7$  Hz, 1H),  $\delta$  2.16 (m, 1H),  $\delta$  1.56 (s, 9H),  $\delta$  1.28 (s, 9H),  $^{13}C$  NMR: 169.7, 152.0, 136.2, 127.8, 122.8, 122.0, 119.4, 118.8, 111.9, 111.2, 110.9, 80.7, 80.1, 75.9, 62.4, 61.6, 41.8, 41.6, 29.7, 28.9, 28.5, 27.9; HRESI-MS  $m/z$  467.2524  $[M + H]^+$  [Calc. for  $C_{24}H_{36}N_2O_5Na^+$ , 467.2522, -1.6 ppm error].

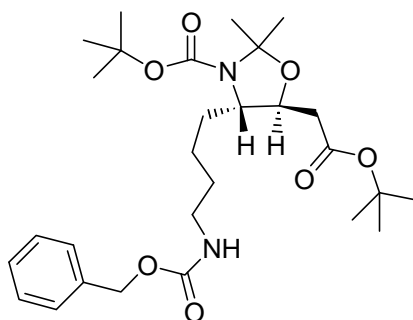

**16c**



**Compound 16c:**  $[\alpha]_D^{27} = +0.45$  (c 3.3,  $\text{CHCl}_3$ ); UV (MeOH)  $\lambda_{\text{max}}$  (log  $\epsilon$ ) 255 nm (6.04); IR (Film)  $\nu_{\text{max}}$ : 3349, 1722, 1704, 1689, 1259  $\text{cm}^{-1}$ ;  $^1\text{H}$  NMR ( $\text{CDCl}_3$  at room temperature): (mixture of conformers)  $J_{\text{H}3,\text{H}4} = 3.5$  Hz;  $\delta$   $^{13}\text{C}$  NMR 169.9, 156.4, 128.5, 128.3, 81.1, 75.9, 66.5, 62.1, 44.6, 40.1, 32.1, 29.7, 28.4, 28.4, 22.9; HR APCI-TOF  $m/z$  521.3225  $[\text{M} + \text{H}]^+$  [Calc. for  $\text{C}_{28}\text{H}_{44}\text{N}_2\text{O}_7^+$ , 521.3228, -0.7 ppm error].

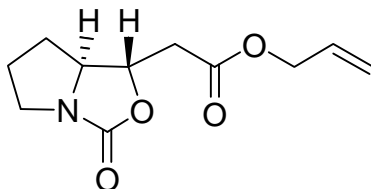

**24c**

**Compound 24c.**  $^1\text{H}$  NMR ( $\text{CDCl}_3$ )  $\delta$  5.95 (dt,  $J=9.1, 4.0$  Hz, 1H),  $\delta$  5.88 (m, 1H),  $\delta$  5.32 (ddt,  $J=17.1, 1.4, 1.3$  Hz, 1H),  $\delta$  5.26 (br. dd 10.4, 0.8 Hz, 1H),  $\delta$  4.60 (d,  $J=6.1$  Hz, 2H),  $\delta$  4.19 (dt, 7.0, 4.0 Hz, 1H),  $\delta$  3.72 (dt,  $J=10.8, 7.3$  Hz, 1H),  $\delta$  3.51 (m, 1H);  $\delta$  2.78 (dd,  $J=16.6, 9.3$  Hz, 1H),  $\delta$  2.71 (dd,  $J=16.6, 4.3$  Hz, 1H),  $\delta$  2.03 (m, 4H),  $^{13}\text{C}$  NMR ( $\text{CDCl}_3$ ) 168.3, 148.3, 131.3, 119.3, 72.9, 60.1, 61.2, 50.8, 36.2, 25.9, 23.3. HR APCI-TOF  $m/z$  226.1075  $[\text{M} + \text{H}]^+$  [Calc. for  $\text{C}_{11}\text{H}_{16}\text{NO}_4^+$ , 226.1076, -0.4 ppm error].

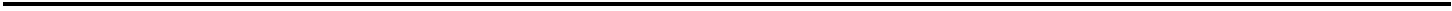

Supplement: NIHMS86475-supplement-2_si_002.pdf [file NIHMS86475-supplement-2_si_002.pdf]
